# 1 **Prolonged morphological expansion of spiny-rayed fishes** 2 **following the end-Cretaceous**

3  
4 Ava Ghezelayagh\*<sup>1</sup>, Richard C. Harrington\*<sup>1</sup>, Edward D. Burress<sup>1</sup>, Matthew A. Campbell<sup>2,3</sup>,  
5 Janet C. Buckner<sup>4,6</sup>, Prosanta Chakrabarty<sup>4</sup>, Jessica R. Glass<sup>5</sup>, W. Tyler McCraney<sup>6</sup>, Peter J.  
6 Unmack<sup>7</sup>, Christine E. Thacker<sup>8,9</sup>, Michael E. Alfaro<sup>6</sup>, Sarah T. Friedman<sup>1</sup>, William B. Ludt<sup>9</sup>,  
7 Peter F. Cowman<sup>10</sup>, Matt Friedman<sup>11,12</sup>, Samantha A. Price<sup>13</sup>, Alex Dornburg<sup>14</sup>, Brant C.  
8 Faircloth<sup>4</sup>, Peter C. Wainwright<sup>15</sup>, Thomas J. Near<sup>1,16</sup>

9  
10 1. Department of Ecology and Evolutionary Biology, Yale University, New Haven, Connecticut  
11 06520-8106, USA

12 2. Department of Animal Science, University of California, Davis, California 95616-5270, USA

13 3. University of Alaska Museum of the North, Fairbanks, Alaska 99775, USA

14 4. Museum of Natural Science and Department of Biological Sciences, Louisiana State  
15 University, Baton Rouge, Louisiana 70803, USA

16 5. College of Fisheries and Ocean Sciences, University of Alaska Fairbanks, Fairbanks, Alaska  
17 99775, USA

18 6. Department of Ecology and Evolutionary Biology, University of California, Los Angeles,  
19 California 90095-1606, USA

20 7. Institute for Applied Ecology, University of Canberra, ACT 2601, Australia

21 8. Santa Barbara Museum of Natural History, Santa Barbara, California 93105, USA

22 9. Natural History Museum of Los Angeles County, Los Angeles, California 90007, USA

23 10. Queensland Museum, Townsville, QLD 4810, Australia

24 11. Department of Earth and Environmental Sciences, University of Michigan, Ann Arbor,  
25 Michigan 48109-1079, USA

26 12. Museum of Paleontology, University of Michigan, Ann Arbor, Michigan 48109-1079, USA

27 13. Department of Biological Sciences, Clemson University, Clemson, South Carolina 29634,  
28 USA

29 14. Department of Bioinformatics and Genomics, University of North Carolina, Charlotte, North  
30 Carolina 28223, USA

31 15. Department of Evolution and Ecology, University of California, Davis, California 95616-  
32 5270, USA

33 16. Peabody Museum of Natural History, Yale University, New Haven, Connecticut 06520-  
34 8106, USA

35

36 \* These authors contributed equally to this work

## 37 **Abstract**

38  
39 **Spiny-rayed fishes (Acanthomorpha) dominate modern marine habitats and comprise**  
40 **more than a quarter of all living vertebrate species<sup>1-3</sup>. It is believed that this dominance**  
41 **resulted from explosive lineage and phenotypic diversification coincident with the**  
42 **Cretaceous-Paleogene (K-Pg) mass-extinction event<sup>4</sup>. It remains unclear, however, if living**  
43 **acanthomorph diversity is the result of a punctuated burst or gradual accumulation of**  
44 **diversity following the K-Pg. We assess these hypotheses with a time-calibrated phylogeny**  
45 **inferred using ultraconserved elements from a sampling of species that represent over 91%**  
46 **of all acanthomorph families, as well as an extensive body shape dataset of extant species.**  
47 **Our results indicate that several million years after the end-Cretaceous, acanthomorphs**  
48 **underwent a prolonged and significant expansion of morphological disparity primarily**  
49 **driven by changes in body elongation, and that acanthomorph lineages containing the bulk**  
50 **of the living species diversity originated throughout the Cenozoic. These acanthomorph**  
51 **lineages radiated into distinct regions of morphospace and retained their iconic**  
52 **phenotypes, including a large group of laterally compressed reef fishes, fast-swimming**  
53 **open-ocean predators, bottom-dwelling flatfishes, seahorses, and pufferfishes. The**  
54 **evolutionary success of spiny-rayed fishes is the culmination of a post K-Pg adaptive**  
55 **radiation in which rates of lineage diversification were decoupled from periods of high**  
56 **phenotypic disparity.**

## 57 58 **Main**

59  
60 The Cretaceous-Paleogene (K-Pg) mass extinction fundamentally affected the  
61 evolutionary trajectory of terrestrial vertebrates, laying the foundation for spectacular radiations

62 of eutherian mammals, neoavian birds, amphibians, and squamates<sup>5-12</sup>. In contrast, the impact of  
63 the K-Pg on marine vertebrate lineages is less clear. Most marine vertebrates are spiny-rayed  
64 fishes (Acanthomorpha), which collectively represent over a quarter of all living vertebrates<sup>3</sup>. It  
65 is hypothesized that the mass extinction of dominant Mesozoic plankton feeders following the K-  
66 Pg relieved acanthomorph fishes from previous predation and competitive pressures, enabling  
67 their occupation of vacated niches<sup>13</sup>. Paleogene fossils suggest a corresponding increase in  
68 acanthomorph taxonomic diversity and morphological disparity<sup>14</sup>, and phylogenomic analyses  
69 have prompted the complementary proposal that the origins of many major acanthomorph  
70 lineages coincide with the K-Pg<sup>4,15</sup>. However, the acanthomorph fossil record is sparse in the 20  
71 million years around the end-Cretaceous<sup>16</sup>, and phylogenomic efforts to date have been limited  
72 by sampling designs that inadequately represents the group's staggering taxonomic richness<sup>4,15</sup>.  
73 These factors have hindered the resolution of the timing and patterns of acanthomorph  
74 diversification near the K-Pg; it remains uncertain if acanthomorph diversification in the  
75 Cenozoic was gradual or punctuated, and whether there is a coupling of phenotypic and lineage  
76 diversification that is considered a hallmark of adaptive radiation<sup>17</sup>. A well-resolved, time-  
77 calibrated, phylogeny that includes all major lineages is critical to understanding the  
78 evolutionary dynamics of spiny-rayed fishes in the wake of the K-Pg.

79  
80 The largest challenge to acanthomorph evolutionary studies is inferring a phylogeny of its  
81 more than 19,450 species<sup>3</sup>. The resolution of relationships within the subclade Percomorpha,  
82 which contains more than 95% of all acanthomorph species, has been particularly difficult.  
83 During most of the twentieth century, inferences of acanthomorph and percomorph relationships  
84 relied on anatomical characters that resulted in largely unresolved phylogenetic hypotheses<sup>18</sup>.  
85 Although these early morphological investigations defined major groups of acanthomorphs, their

86 conclusions were dramatically upended by the introduction of phylogenies inferred from a  
87 relatively small number of Sanger-sequenced mitochondrial and nuclear genes<sup>1,19-22</sup>. For  
88 instance, molecular phylogenies placed the anglerfishes—long classified with the group of non-  
89 percomorph acanthomorphs that includes the economically-important cods (Gadiformes)—well  
90 within Percomorpha as the sister lineage of the pufferfishes<sup>19</sup>. In addition, molecular phylogenies  
91 have identified several major lineages of percomorphs that each encompass a large number of  
92 species and taxonomic families<sup>1,21</sup>. As an example, one of these lineages discovered in molecular  
93 phylogenetic studies contains such disparate lineages as cichlids, blennies, guppies, flyingfishes,  
94 surfperches, and mullets<sup>22</sup>. Despite this progress, the interrelationships among and within the  
95 major lineages of percomorphs and acanthomorphs remain unresolved due to limited  
96 informativeness in Sanger DNA sequence datasets and limited taxonomic sampling of previous  
97 phylogenomic analyses<sup>1,4,15,19-23</sup>.

98  
99 Here, we present the results of comprehensive phylogenomic analyses and estimates of  
100 divergence times of 1,084 species representing 308 of the 337 (91.4%) acanthomorph taxonomic  
101 families. We additionally sampled nine species from Aulopiformes (lizardfishes), Myctophidae  
102 (lanternfishes), and Neoscopelidae (blackchins) to serve as outgroups. Our phylogenomic  
103 inferences are based on a DNA sequence alignment of 989 ultraconserved element (UCE) loci  
104 and our divergence time estimates were calibrated with 43 fossil constraints. We combine this  
105 new acanthomorph time tree with phenotypic data for 680 living acanthomorph species<sup>24</sup> to  
106 explore the patterns of body shape diversification in spiny-rayed fishes across the K-Pg  
107 boundary.

108

109           The maximum likelihood analysis of the concatenated UCE dataset departs from previous  
110 efforts by providing confident phylogenetic resolution of nearly all sampled families of  
111 acanthomorphs and percomorphs (Fig. 1, 2, Supplementary Figs. 1-25). The UCE phylogeny  
112 differs from a phylogenomic analysis of exon capture data in the identification of  
113 Paracanthopterygii as monophyletic, the resolution of a clade containing beardfishes (*Polymixia*)  
114 and percopsiforms (troutperches, Pirate Perch, and amblyopsid cavefishes), and the placement of  
115 Beryciformes (containing Berycoidei and Holocentridae) as the sister lineage of the species-rich  
116 Percomorpha (Fig. 1, Extended Data Fig. 1)<sup>15</sup>. Our results are consistent with earlier molecular  
117 analyses in regard to the resolution of major percomorph clades that each include a large number  
118 of taxonomic families<sup>1,4,15,19-23</sup>. For example, there is strong node support [Bootstrap support  
119 (BSS) = 100%] for the percomorph subclade Acanthuriformes<sup>25</sup>, a monophyletic group  
120 comprising more than 2,325 species, including anglerfishes, pufferfishes, butterflyfishes, and  
121 scores of other percomorph lineages that long evaded resolution in morphological and molecular  
122 analyses (Fig. 2). The relationships among the most inclusive lineages of acanthomorphs inferred  
123 from the concatenated datasets are largely corroborated in species tree estimates using coalescent  
124 methods from individual gene trees (Supplementary Fig. 26). Exceptions include the placement  
125 of codlets (*Bregmaceros*), Beryciformes, and several lineages of Eupercaria whose phylogenetic  
126 relationships have historically been difficult to resolve<sup>1,21</sup>.

127  
128           In addition to yielding confident phylogenetic resolution among major lineages and  
129 taxonomic families, the maximum likelihood UCE phylogeny reveals novel relationships among  
130 some of the most scientifically interesting lineages of percomorph fishes (Figs. 1, 2,  
131 Supplementary Figs. 1-25). For example, Sanger sequencing studies led to the discovery that the  
132 enigmatic coral reef-dwelling engineer gobies (*Pholidichthys*) are the sister lineage of freshwater

133 cichlids (Fig. 1, Supplementary Fig. 11)<sup>1,21,22</sup>. Whereas these Sanger analyses provided weak  
134 resolution beyond the monophyly of these two lineages, our UCE phylogeny resolves the  
135 freshwater tropical African and South American leaffishes (Polycentridae) as the sister lineage of  
136 the *Pholidichthys*-cichlid clade (BSS = 100%), providing an opportunity for insight into the  
137 evolution of the remarkable species richness and key morphological novelties found in cichlid  
138 fishes. We also confidently resolve the near-shore rocky reef dwelling False Scorpionfish  
139 (*Centrogenys vaigiensis*) as the sister lineage to a clade of more than 630 species of wrasses and  
140 parrotfishes (Labridae; BSS = 100%) (Fig. 2, Supplementary Fig. 21). This newly discovered  
141 relationship is not corroborated by the species tree analysis, but consistent with this discovery is  
142 that wrasses and *Centrogenys vaigiensis* share ancestral, highly modified components of the  
143 “labroid” pharyngeal jaw apparatus<sup>22</sup>. This result thereby reduces the number of independent  
144 evolutions of pharyngognathy, an advanced feeding mechanism that promotes trophic  
145 diversification by freeing the oral jaws from prey-processing functions<sup>22</sup>. The maximum  
146 likelihood phylogeny inferred from our UCE dataset provides an important framework for  
147 further exploration of the relationships among the most closely related lineages of acanthomorph  
148 and percomorph fishes.

149  
150         Divergence time estimates for Acanthomorpha, inferred from relaxed molecular clock  
151 analyses calibrated with 43 well-justified fossil calibrations, allow for unprecedented resolution  
152 of the timing and tempo of family-level lineage diversification. The mean Bayesian posterior age  
153 estimates for stem lineages for 80% of living acanthomorph families post-date the K-Pg and are  
154 primarily distributed across the Paleocene through the early Miocene (~65 – 15 Mya) (Extended  
155 Data Fig. 2). This pattern contrasts with earlier hypotheses of an explosive origin of  
156 acanthomorph familial diversity following the K-Pg mass extinction<sup>4,16</sup>. Plotting the

157 accumulation of acanthomorph family origination times reveals an extended period of lineage  
158 origination that persists for approximately 40 million years after the K-Pg (Fig. 2). Although  
159 most of the taxonomic families assigned to living acanthomorphs originated in the Paleogene, we  
160 detect no statistically supported mass extinctions or tree-wide shifts in lineage diversification  
161 rates, indicating an indiscernible effect of the K-Pg on acanthomorph lineage diversification  
162 (Extended Data Fig. 3). Moreover, stepping-stone simulations, used to evaluate the relative and  
163 absolute fit of competing diversification models to the observed time-calibrated phylogeny,  
164 strongly support a constant-rate birth-death model (Extended Data Table 1). Bayesian estimates  
165 of the evolutionary rates of individual acanthomorph lineages are similarly homogenous across  
166 the K-Pg and through the Cenozoic (Extended Data Fig. 4). We observe increases in speciation  
167 rates in only a few percomorph clades, such as branches in the phylogeny leading to Apogonidae  
168 (cardinalfishes), Pseudocrenilabrinae (most Middle Eastern and African cichlids),  
169 Chaetodontidae (butterflyfishes), the species-rich *Sebastes* (rockfishes), and Lycodinae (a  
170 lineage of eelpouts).

171  
172         Although lineage diversification rate remained constant through the K-Pg boundary,  
173 acanthomorph body shapes began diversifying sharply at the start of the Paleogene into distinct  
174 regions of morphospace that correspond to iconic present-day ecomorphological types (Fig. 2,  
175 Extended Data Fig. 5, Supplementary Fig. 27). Our analyses of body shape disparity through  
176 time, repeated on a sample of 100 trees from the posterior distribution of BEAST time-trees,  
177 show that the sudden diversification of acanthomorph body shapes began an average of  
178 approximately five million years after the K-Pg (Supplementary Fig. 28). This period of high  
179 between-clade phenotypic variation persisted until the early to mid-Eocene (~45 – 40 Mya) (Fig.  
180 2). This pattern was not driven by a single clade, but rather occurred across all of

181 Acanthomorpha coincident with the origin of several major lineages (Figs. 1,2, Extended Data  
182 Fig. 6a). In contrast, subsequent radiations of acanthomorphs primarily occurred within specific  
183 percomorph lineages (Extended Data Fig. 5b, Supplementary Fig. 27). These clades expanded  
184 into well recognized ecomorphological types, such as pufferfishes and allies (Tetraodontoidei),  
185 the charismatic seahorses and relatives (Syngnathiformes), a group of open ocean predators  
186 (Scombriformes), bottom-dwelling flatfishes, a large clade of deep-bodied laterally compressed  
187 reef fishes including surgeonfishes, butterflyfishes and rabbitfishes, and Perciformes, which  
188 includes many large-mouthed predators that repeatedly invaded benthic habitats (Extended Data  
189 Fig. 5, Supplementary Fig. 27).

190  
191 Our estimate of the timing of acanthomorph body shape diversification at the onset of the  
192 Paleogene refines inferences from the fossil record. Acanthomorph taxonomic diversity and  
193 morphological disparity was low in the Late Cretaceous prior to the K-Pg event, after which  
194 body shape disparity and taxonomic diversity became greatly elevated<sup>14,16</sup>. The timing of this  
195 diversification remained unclear due to a scarcity of deposits yielding abundant and well-  
196 preserved teleost skeletons between the Campanian-Maastrichtian (~72 Mya) in the Late  
197 Cretaceous to the Paleocene-Eocene boundary (~56 Mya)<sup>14,16</sup>. Though isolated acanthomorph  
198 otoliths are known throughout this interval, they remain little studied relative to those from  
199 Eocene and younger deposits<sup>26</sup>. Our analyses provide the precision lacking in the fossil record,  
200 revealing that the disparity observed in early Cenozoic fossil acanthomorphs was likely the  
201 product of an extended period of phenotypic diversification that began approximately 60 Mya  
202 and lasted approximately 15-20 Myr. The initiation of a steady accumulation of living  
203 acanthomorph families and morphological disparity following the K-Pg extends through much of



204 the acanthomorph fossil gap (Fig. 2), demonstrating that the rise of acanthomorph diversity in the  
205 early Eocene was not punctuated<sup>16</sup>.

206  
207 The prolonged expansion of morphological variation following the K-Pg was dominated  
208 by divergences in body elongation between clades (Extended Data Fig. 5a, Extended Data Fig.  
209 6b,c), a phenotypic trait that has adaptive consequences. Body elongation is a primary axis of  
210 body shape variation in freshwater and marine fishes<sup>24,27</sup> that is often coupled with habitat  
211 transitions between pelagic, demersal and fully benthic habitats<sup>28</sup>, including in the aftermath of  
212 the K-Pg extinction<sup>23</sup>. Our observations of diversification in body elongation shortly after the K-  
213 Pg is therefore likely correlated with niche divergence along the benthic-pelagic axis. This  
214 pattern of morphological diversification is consistent with the classic trend in phenotypic  
215 evolution during adaptive radiation<sup>17</sup>, although it was not accompanied by changes in lineage  
216 diversification rate. Nonetheless, our results imply that conditions in the aftermath of the global  
217 K-Pg event promoted exceptional morphological diversification perhaps in response to the novel  
218 landscape of ecological opportunity that took shape during the Paleogene<sup>13</sup>.

219  
220 Our results provide a new perspective to the role of the K-Pg as a catalyst of vertebrate  
221 diversification by demonstrating that its effects on acanthomorph lineage diversification rates  
222 and disparity were decoupled. Although there is no indication that acanthomorph lineage  
223 diversification rates increased near the K-Pg, much less explosively (Extended Data Fig. 3), the  
224 time following the K-Pg undoubtedly played a critical role in increasing taxonomic diversity and  
225 shaping the ecomorphological disparity of the vast majority of living spiny-rayed fishes (Fig. 2  
226 and Extended Data Fig. 2). The approximately 15-20 Myr period following the K-Pg brought  
227 about the origin of ecomorphological types that acted as a reservoir of diversity, setting the stage

228 for more recent, phylogenetically or geographically localized radiations, including endothermic  
229 open-ocean tunas, Antarctic notothenioids, parrotfishes on modern coral reefs, and African Rift  
230 Lake cichlids<sup>29-32</sup>. Though the decoupling of lineage and phenotypic diversification in  
231 Acanthomorpha contradicts commonly invoked expectations of adaptive radiation<sup>17</sup>, this pattern  
232 is evident in the evolutionary dynamics of other vertebrate adaptive radiations following the K-  
233 Pg, including birds and placental mammals<sup>5,8,33,34</sup>. Our findings illuminate the origin of  
234 phenotypic diversity that characterizes the dominance of acanthomorph fishes in modern marine  
235 habitats and broadens our understanding of adaptive radiation in species-rich vertebrate lineages  
236 following the K-Pg mass extinction event.

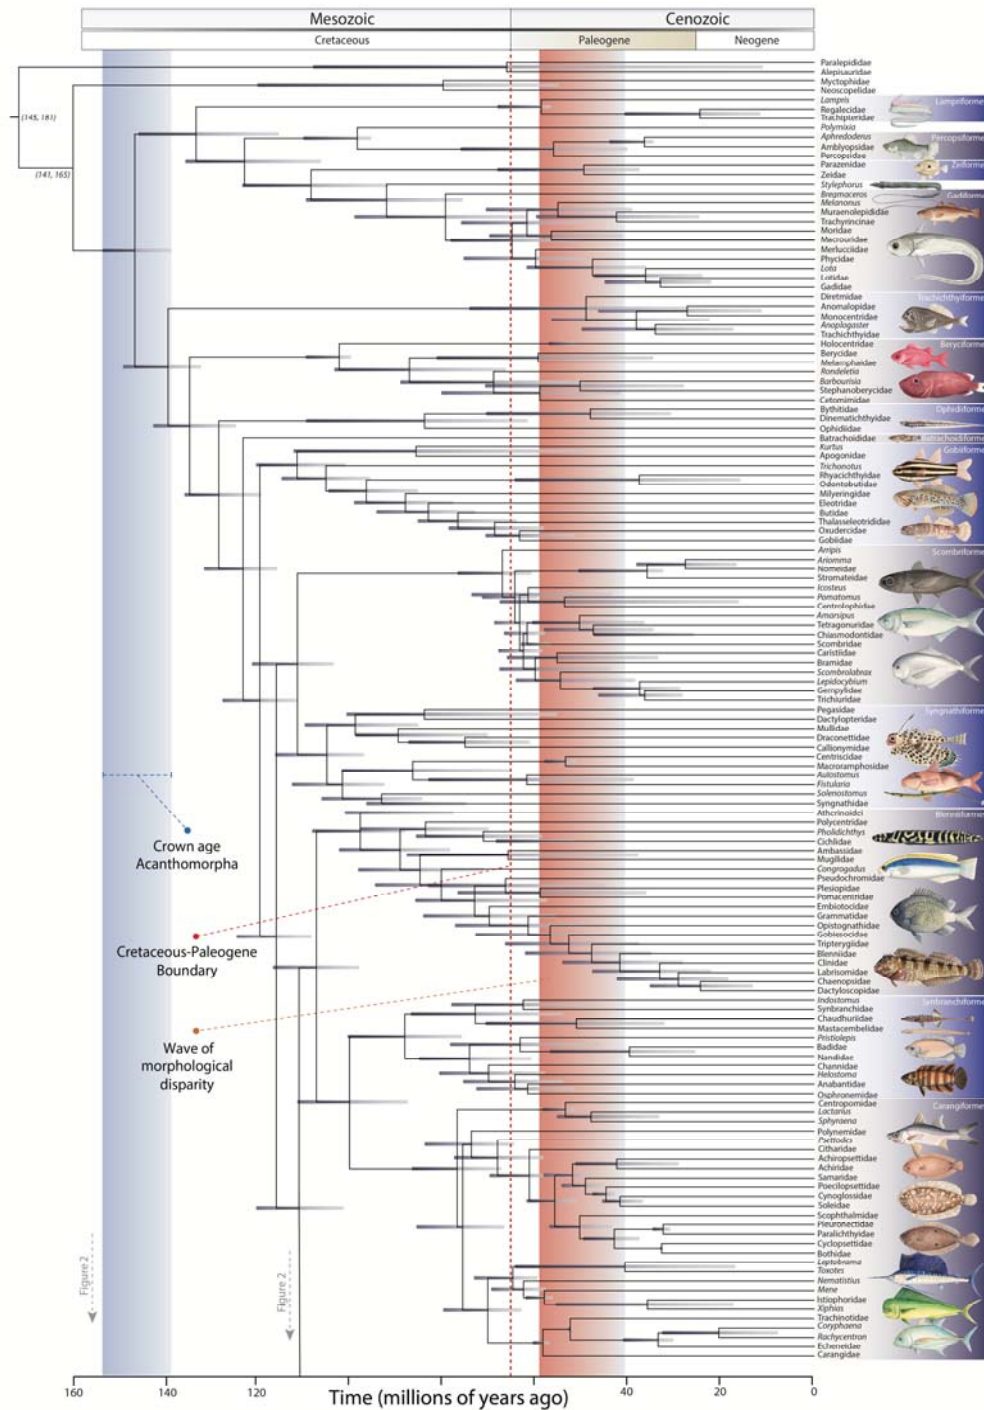

237

238 **Fig. 1: Time-calibrated phylogeny of Acanthomorpha.**

239 The phylogeny is condensed to represent taxonomic families at the tips. For families containing a  
 240 single species or genus, the genus name is given at the tip. Shaded tabs to the right of taxon  
 241 labels identify inclusive taxonomic orders. Horizontal gray bars at each node portray the 95%  
 242 highest posterior density (HPD) of node age estimates. The blue shaded region reflects the 95%  
 243 HPD of the crown age of Acanthomorpha. Maximum likelihood bootstrap support values for  
 244 relationships are in Supplementary Figs. 1-25. The time-calibrated phylogeny continues in Fig. 2.

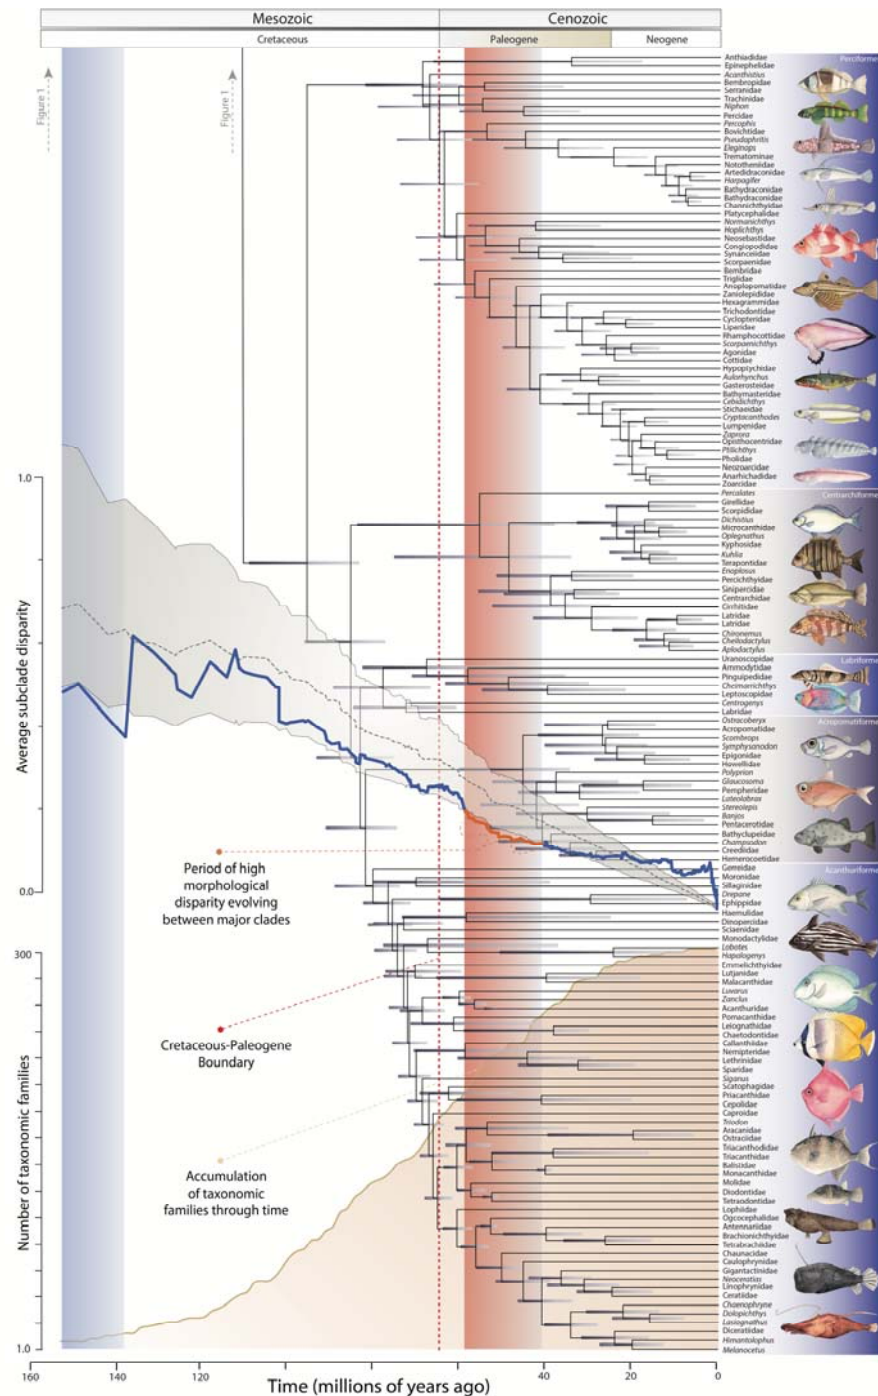

245

246 **Fig. 2: Time-calibrated phylogeny and disparity and lineage accumulation through time for**  
 247 **Acanthomorpha.**

248 Time-calibrated phylogeny condensed to represent taxonomic families at the tips (continued  
 249 from Fig. 1). The solid blue line (middle plot) shows observed morphological disparity through  
 250 time (DTT) and the red portion of the line represents the significant increase in among-clade  
 251 disparity in the early Eocene. The dashed black line and surrounding gray envelope represent the  
 252 median DTT and 95% confidence interval under Brownian evolution, respectively. The lower  
 253 plot estimates the cumulative number of taxonomic families through time. A vertical red dashed  
 254 line marks the K-Pg.

## 255 Main references

- 256
- 
- 257 1 Near, T. J. *et al.* Phylogeny and tempo of diversification in the superradiation of spiny-  
258 rayed fishes. *Proc. Nat. Acad. Sci. USA* **110**, 12738-12743,  
259 doi:10.1073/pnas.1304661110 (2013).
- 260 2 Wainwright, P. C. & Longo, S. J. Functional innovations and the conquest of the oceans  
261 by acanthomorph fishes. *Curr. Biol.* **27**, R550-R557,  
262 doi:<https://doi.org/10.1016/j.cub.2017.03.044> (2017).
- 263 3 Eschmeyer, W. N. & Fricke, R. (California Academy of Sciences (  
264 <http://research.calacademy.org/research/ichthyology/catalog/fishcatmain.asp>), San  
265 Francisco, 2021).
- 266 4 Alfaro, M. E. *et al.* Explosive diversification of marine fishes at the Cretaceous–  
267 Palaeogene boundary. *Nature Ecol. & Evol.* **2**, 688-696, doi:10.1038/s41559-018-0494-6  
268 (2018).
- 269 5 Meredith, R. W. *et al.* Impacts of the Cretaceous terrestrial revolution and KPg extinction  
270 on mammal diversification. *Science* **334**, 521-524, doi:10.1126/science.1211028 (2011).
- 271 6 Stadler, T. Mammalian phylogeny reveals recent diversification rate shifts. *Proc. Nat.*  
272 *Acad. Sci. USA* **108**, 6187-6192, doi:10.1073/pnas.1016876108 (2011).
- 273 7 Venditti, C., Meade, A. & Pagel, M. Multiple routes to mammalian diversity. *Nature* **479**,  
274 393-396, doi:10.1038/Nature10516 (2011).
- 275 8 Slater, G. J. Phylogenetic evidence for a shift in the mode of mammalian body size  
276 evolution at the Cretaceous-Palaeogene boundary. *Methods Ecol Evol* **4**, 734-744,  
277 doi:10.1111/2041-210X.12084 (2013).
- 278 9 Liu, L. *et al.* Genomic evidence reveals a radiation of placental mammals uninterrupted  
279 by the KPg boundary. *Proceedings of the National Academy of Sciences* **114**, E7282-  
280 E7290, doi:10.1073/pnas.1616744114 (2017).
- 281 10 Jetz, W. & Pyron, R. A. The interplay of past diversification and evolutionary isolation  
282 with present imperilment across the amphibian tree of life. *Nature Ecol. & Evol.* **2**, 850-  
283 858, doi:10.1038/s41559-018-0515-5 (2018).

- 284 11 Longrich, N. R., Bhullar, B.-A. S. & Gauthier, J. Mass extinction of lizards and snakes at  
285 the Cretaceous-Paleogene boundary. *Proc. Nat. Acad. Sci. USA* **109**, 21396-21401,  
286 doi:10.1073/pnas.1211526110 (2012).
- 287 12 Jarvis, E. D. *et al.* Whole-genome analyses resolve early branches in the tree of life of  
288 modern birds. *Science* **346**, 1320, doi:10.1126/science.1253451 (2014).
- 289 13 Sibert, E. C. & Norris, R. D. New Age of Fishes initiated by the Cretaceous–Paleogene  
290 mass extinction. *Proceedings of the National Academy of Sciences* **112**, 8537,  
291 doi:10.1073/pnas.1504985112 (2015).
- 292 14 Friedman, M. Explosive morphological diversification of spiny-finned teleost fishes in  
293 the aftermath of the end-Cretaceous extinction. *Proc. R. Soc. B* **277**, 1675-1683,  
294 doi:10.1098/rspb.2009.2177 (2010).
- 295 15 Hughes, L. C. *et al.* Comprehensive phylogeny of ray-finned fishes (Actinopterygii)  
296 based on transcriptomic and genomic data. *Proc. Nat. Acad. Sci. USA*,  
297 doi:10.1073/pnas.1719358115 (2018).
- 298 16 Patterson, C. An overview of the early fossil record of acanthomorphs. *Bull. Mar. Sci.* **52**,  
299 29-59 (1993).
- 300 17 Schluter, D. *The ecology of adaptive radiation*. (Oxford University Press, 2000).
- 301 18 Johnson, G. D. & Patterson, C. Percomorph phylogeny: a survey of acanthomorphs and a  
302 new proposal. *Bull. Mar. Sci.* **52**, 554-626 (1993).
- 303 19 Miya, M. *et al.* Major patterns of higher teleostean phylogenies: a new perspective based  
304 on 100 complete mitochondrial DNA sequences. *Mol. Phylogenet. Evol.* **26**, 121-138,  
305 doi:10.1016/S1055-7903(02)00332-9 (2003).
- 306 20 Near, T. J. *et al.* Resolution of ray-finned fish phylogeny and timing of diversification.  
307 *Proc. Nat. Acad. Sci. USA* **109**, 13698-13703, doi:10.1073/Pnas.1206625109 (2012).
- 308 21 Betancur-R, R. *et al.* The tree of life and a new classification of bony fishes. *PLOS Cur.*  
309 *Tree of Life* **2013** doi:10.1371/currents.tol.53ba26640df0ccaee75bb165c8c26288 (2013).
- 310 22 Wainwright, P. C. *et al.* The evolution of pharyngognathy: a phylogenetic and functional  
311 appraisal of the pharyngeal jaw key innovation in labroid fishes and beyond. *Syst. Biol.*  
312 **61**, 1001-1027, doi:10.1093/sysbio/sys060 (2012).

- 313 23 Ribeiro, E., Davis, A. M., Rivero-Vega, R. A., Ortí, G. & Betancur-R, R. Post-Cretaceous  
314 bursts of evolution along the benthic-pelagic axis in marine fishes. *Proceedings of the*  
315 *Royal Society B: Biological Sciences* **285**, 20182010, doi:10.1098/rspb.2018.2010 (2018).
- 316 24 Price, S. A. *et al.* Building a body shape morphospace of teleostean fishes. *Integ. Comp.*  
317 *Biol.* **59**, 716-730, doi:10.1093/icb/icz115 (2019).
- 318 25 Smith, W. L., Stern, J. H., Girard, M. G. & Davis, M. P. Evolution of venomous  
319 cartilaginous and ray-finned fishes. *Integ. Comp. Biol.* **56**, 950-961,  
320 doi:10.1093/icb/icw070 (2016).
- 321 26 Schwarzhans, W. & Stringer, G. Fish otoliths from the Late Maastrichtian Kemp Clay  
322 (Texas, USA) and the Early Dannian Clayton Formation (Arkansas, USA) and an  
323 assessment of extinction and survival of teleost lineages across the K-Pg boundary based  
324 on otoliths. *Riv. Ital. Paleontol. Strat.* **126**, 395-446, doi:10.13130/2039-4942/13425  
325 (2020).
- 326 27 Claverie, T. & Wainwright, P. C. A morphospace for reef fishes: elongation is the  
327 dominant axis of body shape evolution. *PloS one* **9**, e112732,  
328 doi:10.1371/journal.pone.0112732 (2014).
- 329 28 Friedman, S. T. *et al.* Body shape diversification along the benthic–pelagic axis in marine  
330 fishes. *Proceedings of the Royal Society B: Biological Sciences* **287**, 20201053,  
331 doi:10.1098/rspb.2020.1053 (2020).
- 332 29 Friedman, M. *et al.* A phylogenomic framework for pelagiarian fishes (Acanthomorpha:  
333 Percomorpha) highlights mosaic radiation in the open ocean. *Proceedings of the Royal*  
334 *Society B: Biological Sciences* **286**, 20191502, doi:10.1098/rspb.2019.1502 (2019).
- 335 30 Near, T. J. *et al.* Ancient climate change, antifreeze, and the evolutionary diversification  
336 of Antarctic fishes. *Proc. Nat. Acad. Sci. USA* **109**, 3434-3439,  
337 doi:10.1073/pnas.1115169109 (2012).
- 338 31 Price, S. A., Holzman, R., Near, T. J. & Wainwright, P. C. Coral reefs promote the  
339 evolution of morphological diversity and ecological novelty in labrid fishes. *Ecol Lett* **14**,  
340 462-469, doi:10.1111/j.1461-0248.2011.01607.x (2011).
- 341 32 McGee, M. D. *et al.* The ecological and genomic basis of explosive adaptive radiation.  
342 *Nature*, doi:10.1038/s41586-020-2652-7 (2020).

- 343 33 Jetz, W., Thomas, G. H., Joy, J. B., Hartmann, K. & Mooers, A. O. The global diversity  
344 of birds in space and time. *Nature* **491**, 444-448, doi:10.1038/nature11631 (2012).  
345 34 Slater, G. J., Price, S. A., Santini, F. & Alfaro, M. E. Diversity versus disparity and the  
346 radiation of modern cetaceans. *Proc. R. Soc. B* **277**, 3097-3104 (2010).

347

## 348 **Methods**

349

350 Detailed descriptions of all procedures are available in the Supplementary Information.

351

### 352 **Taxon sampling and procurement of sequence data**

353 This study incorporates ultraconserved element (UCE) sequence data from 1,109 specimens,  
354 including nine outgroup taxa and 1,075 acanthomorph species spanning 308 recognized,  
355 taxonomic families in Acanthomorpha (Supplementary Table 1). We generated new sequence  
356 data from 647 specimens representing 628 species of acanthomorphs and six outgroups. We  
357 extracted DNA from muscle or fin tissue following the standard protocol for Qiagen's DNeasy  
358 Blood and Tissue kits. We prepared dual-indexed DNA libraries and targeted the 1,314 UCE loci  
359 enriched by the myBaits UCE Acanthomorph kit from Arbor Biosciences<sup>4</sup>. Enriched libraries  
360 were sequenced on Illumina HiSeq platforms in  $2 \times 150$  bp paired-end runs. UCE data for 360  
361 specimens came from five previous phylogenomic studies (Supplementary Table 1), and UCE  
362 sequences for 96 species were extracted from whole genome shotgun sequence data published in  
363 the NCBI GenBank<sup>35,36</sup>

364

### 365 **Data processing and phylogenetic analyses**

366 We used the PHYLUCE<sup>35,36</sup> computer package to process raw read data, conduct de novo  
367 assembly and construct alignments of UCE loci. We generated two separate alignments of UCE  
368 loci present in at least 75% of the samples: one consisting of all 1,109 specimens (1,084 species)



369 and another including only a subset of the 702 species that overlapped with the taxon sampling  
370 of a previously published morphological dataset. The 1,084- and 702-taxon alignments consisted  
371 of 987 loci (383,250 bp) and 989 loci (499,957 bp), respectively.

372  
373 Using these two 75% complete data matrices, we conducted multiple phylogenetic analyses  
374 using maximum likelihood methods in IQ-TREE v. 1.7<sup>37</sup> and RAxML-ng v. 0.9.0<sup>38</sup>. We  
375 topologically constrained the divergence time analyses represented in Figure 1 with phylogenies  
376 inferred in IQ-TREE using single-partition alignments of the 702 taxa and 1,084 taxa datasets.  
377 Both of these tree searches assumed the GTR+Gamma model of molecular evolution and used  
378 ultrafast bootstrap approximation to generate 1,000 bootstrap replicates and 1,000 replicates of  
379 the Shimodaira-Hasegawa approximate likelihood ratio test (SH-aLRT). We used the program  
380 TOPD\_v4.6<sup>39</sup> to ensure the phylogenies inferred using different partitioning schemes and  
381 maximum likelihood programs presented similar tree topologies.

382  
383 We also used IQ-TREE's ModelFinder Plus and ultrafast bootstrap approximation options to  
384 infer maximum likelihood gene trees for each UCE locus. In TreeShrink<sup>40</sup>, we used a false  
385 positive tolerance rate parameter (alpha) of 0.05 to identify and remove potentially aberrant  
386 sequences from the single-gene alignments. We re-aligned filtered alignments using  
387 MAFFT v7.130b<sup>41</sup> and used them to repeat inference of gene trees in IQ-TREE. We employed  
388 the resulting gene trees to generate a summary species tree in ASTRAL-III v5.6.3<sup>42</sup>.

389  
390 We applied Bayesian methods to understand the degree of topological discordance along the  
391 backbone of the Acanthomorph tree. We inferred gene trees for UCE loci with Bayesian methods

392 for an 82-taxon alignment that represented the major acanthomorph subclades and was generated  
393 using MAFFT. We ran these tree searches in MrBayes v. 3.2.7<sup>43</sup> for 2 million generations,  
394 assuming a GTR+Gamma model of molecular evolution. Using an alpha value of 1.0, we  
395 estimated genome-wide concordance factors in BUCKy<sup>44</sup> as a measure of the amount of  
396 topological discordance between these Bayesian gene trees.

397

### 398 **Divergence time estimation**

399 We estimate divergence times for the 702- and 1,084-taxon phylogenies in BEAST v.2.5<sup>45-47</sup> using  
400 reduced datasets of randomly subsampled UCE loci<sup>29,48</sup>. For both phylogenies, we repeated  
401 dating analyses on three different alignments of 30 loci. For each of these alignments, we  
402 accounted for site-specific variation in evolutionary patterns by selecting the best-fit partitioning  
403 schemes using PartitionFinder2 v. 2.1.1<sup>49</sup>. We performed at least three replicate analyses for each  
404 30-locus dataset. We ran all BEAST analyses under a relaxed lognormal clock model and a birth-  
405 death tree model, using the IQ-TREE phylogenies inferred from the single-partition, 702-taxon  
406 and 1,084-taxon alignments as topological constraints. We used forty-three fossil constraints  
407 (detailed in the Supplementary Information) to assign minimum age priors and ran BEAST  
408 analyses for a minimum of 200 million generations after discarding a burnin of 200 million  
409 iterations. We used Tracer v.1.7.1<sup>50</sup> to assess convergence of parameters across replicate MCMC  
410 chains and ensure there were no directional trends in parameter estimates. For each set of random  
411 loci, we combined replicate analyses in LogCombiner and constructed maximum clade  
412 credibility (MCC) trees using TreeAnnotator in BEAST v1.8.4<sup>51</sup>, with summarized node heights  
413 rescaled to reflect the posterior median heights. MCC trees for the 702-taxon datasets were

414 summarized from 10,000 post-burnin, randomly sampled trees, while MCC trees for the 1,084-  
415 taxon datasets were summarized from 1,200 such trees.

416

### 417 **Diversification rate analyses**

418 We removed all outgroup and duplicate taxa from the 1,084 taxa maximum clade credibility tree  
419 displaying the highest effective sample size (ESS) and used this pruned tree for all diversification  
420 rate analyses. We used TESS<sup>52</sup> to conduct stepping-stone simulations that estimated the marginal  
421 likelihoods of eight birth-death models, allowing us to calculate Bayes Factors and assess the  
422 competing models' relative and absolute fits to the time-calibrated phylogeny of  
423 Acanthomorpha. We examined tree-wide speciation, extinction, and net-diversification rates  
424 using TESS's CoMET model. For this analysis, we accounted for our incomplete sampling,  
425 specified a uniform sampling strategy, and ran three replicate reversible-jump MCMC chains  
426 until ESS values were  $\geq 200$ . CoMET runs were checked for within- and between-analysis  
427 convergence of the diversification rate parameters as described in the Supplementary  
428 Information. Using the same time-calibrated phylogeny, we also inferred rate heterogeneity  
429 across lineages using BAMM v.2.5.0<sup>53</sup>. BAMM analyses accounted for the incomplete taxon  
430 sampling of taxonomic families and other major representative clades and used empirically  
431 determined rate priors identified by the R package BAMMtools v.2.1.6<sup>54</sup>. We ran 23 MCMC  
432 chains with different combinations of parameters in BAMM, each for 100 million generations,  
433 and we identified the rate shifts along specific branches that were predicted by at least sixteen of  
434 these analyses.

435

436

437 **Phylogenetic comparative methods**

438 We pruned a body trait dataset of teleost fishes<sup>24</sup> to include maximum body depth, maximum fish  
439 width, head depth, lower-jaw length, mouth width, minimum caudal-peduncle depth, and  
440 minimum caudal-peduncle width for the 680 species that matched the species represented in the  
441 702-taxon UCE phylogeny. To correct for body size, we regressed log-transformed trait values  
442 against log-transformed standard fish lengths and calculated phylogenetic residuals in  
443 PHYTOOLS<sup>55</sup>. We assessed disparity through time using GEIGER<sup>56</sup> and the time-calibrated IQ-  
444 TREE phylogeny. We repeated disparity through time analyses on 100 randomly sampled time  
445 trees from the posterior distribution generated in BEAST, and summarized the mean and 95%  
446 confidence interval for the 1.0 My time interval after the K-Pg during which average subclade  
447 disparity first dropped below the value simulated under Brownian evolution, as well as the  
448 proportion of trees through time that strayed from the Brownian prediction. We tested the  
449 sensitivity of disparity through time analyses to the exclusion of body shape traits and of major  
450 clades that arose immediately around the K-Pg boundary. Finally, we used PHYTOOLS to  
451 visualize body shape morphospace using principal component analysis (PCA) and to generate  
452 phenograms that visualize the evolutionary histories of the following seven major lineages:  
453 Carangiformes, Lophioidei, Perciformes, Scombriformes, “Squamipinnes” (the clade in  
454 Supplemental Fig. 23 defined by *Chaetodon kleinii* and *Luvarus imperialis*), Syngnathiformes  
455 and Tetraodontoidei.

456  
457 **Code availability**

458 Computer code for analyses can be obtained from the authors upon request.

459  
460 **Data availability**

461 Alignments used to perform the analyses in this manuscript are available upon request. NCBI  
462 BioSample Accession numbers corresponding to sequence data are listed in Supplementary  
463 Table 1.

## 464 **Methods references**

- 465
- 
- 466 35 Faircloth, B. C. PHYLUCe is a software package for the analysis of conserved genomic  
467 loci. *Bioinformatics* **32**, 786-788, doi:10.1093/bioinformatics/btv646 (2016).
- 468 36 Faircloth, B. C. *et al.* Ultraconserved elements anchor thousands of genetic markers  
469 spanning multiple evolutionary timescales. *Syst. Biol.* **61**, 717-726,  
470 doi:10.1093/sysbio/sys004 (2012).
- 471 37 Nguyen, L. T., Schmidt, H. A., von Haeseler, A. & Minh, B. Q. IQ-TREE: A fast and  
472 effective stochastic algorithm for estimating maximum likelihood phylogenies. *Mol. Biol.*  
473 *Evol.* **32**, 268-274, doi:10.1093/molbev/msu300 (2015).
- 474 38 Kozlov, A. M., Darriba, D., Flouri, T., Morel, B. & Stamatakis, A. RAxML-NG: a fast,  
475 scalable and user-friendly tool for maximum likelihood phylogenetic inference.  
476 *Bioinformatics* **35**, 4453-4455, doi:10.1093/bioinformatics/btz305 (2019).
- 477 39 Puigbò, P., Garcia-Vallvé, S. & McInerney, J. O. TOPD/FMts: a new software to  
478 compare phylogenetic trees. *Bioinformatics* **23**, 1556-1558,  
479 doi:10.1093/bioinformatics/btm135 (2007).
- 480 40 Mai, U. & Mirarab, S. TreeShrink: fast and accurate detection of outlier long branches in  
481 collections of phylogenetic trees. *Bmc Genomics* **19**, 272, doi:10.1186/s12864-018-4620-  
482 2 (2018).
- 483 41 Katoh, K. & Standley, D. M. MAFFT multiple sequence alignment software Version 7:  
484 improvements in performance and usability. *Mol. Biol. Evol.* **30**, 772-780,  
485 doi:10.1093/molbev/mst010 (2013).
- 486 42 Zhang, C., Rabiee, M., Sayyari, E. & Mirarab, S. ASTRAL-III: polynomial time species  
487 tree reconstruction from partially resolved gene trees. *BMC Bioinf.* **19**, 153,  
488 doi:10.1186/s12859-018-2129-y (2018).
- 489 43 Ronquist, F. *et al.* MrBayes 3.2: efficient Bayesian phylogenetic inference and model  
490 choice across a large model space. *Syst. Biol.* **61**, 539-542, doi:10.1093/sysbio/sys029  
491 (2012).
- 492 44 Ane, C., Larget, B., Baum, D. A., Smith, S. D. & Rokas, A. Bayesian estimation of  
493 concordance among gene trees. *Mol. Biol. Evol.* **24**, 412-426,  
494 doi:10.1093/molbev/msl170 (2007).

- 495 45 Bouckaert, R. *et al.* BEAST 2: a software platform for Bayesian evolutionary analysis.  
496 *Plos Comput Biol* **10**, e1003537, doi:10.1371/journal.pcbi.1003537 (2014).
- 497 46 Gernhard, T. The conditioned reconstructed process. *Journal of Theoretical Biology* **253**,  
498 769-778, doi:10.1016/j.jtbi.2008.04.005 (2008).
- 499 47 Drummond, A. J., Ho, S. Y. W., Phillips, M. J. & Rambaut, A. Relaxed phylogenetics  
500 and dating with confidence. *PLOS Biol.* **4**, 699-710, doi:10.1371/journal.pbio.0040088  
501 (2006).
- 502 48 Harrington, R. C. *et al.* Phylogenomic analysis of carangimorph fishes reveals flatfish  
503 asymmetry arose in a blink of the evolutionary eye. *BMC Evol. Biol.* **16**, 224,  
504 doi:10.1186/s12862-016-0786-x (2016).
- 505 49 Lanfear, R., Frandsen, P. B., Wright, A. M., Senfeld, T. & Calcott, B. PartitionFinder 2:  
506 New methods for selecting partitioned models of evolution for molecular and  
507 morphological phylogenetic analyses. *Mol. Biol. Evol.* **34**, 772-773,  
508 doi:10.1093/molbev/msw260 (2017).
- 509 50 Rambaut, A., Drummond, A. J., Xie, D., Baele, G. & Suchard, M. A. Posterior  
510 summarization in Bayesian phylogenetics using Tracer 1.7. *Syst. Biol.* **67**, 901-904,  
511 doi:10.1093/sysbio/syy032 (2018).
- 512 51 Drummond, A. J., Suchard, M. A., Xie, D. & Rambaut, A. Bayesian phylogenetics with  
513 BEAUti and the BEAST 1.7. *Mol. Biol. Evol.* **29**, 1969-1973,  
514 doi:10.1093/molbev/mss075 (2012).
- 515 52 Höhna, S., May, M. R. & Moore, B. R. TESS: an R package for efficiently simulating  
516 phylogenetic trees and performing Bayesian inference of lineage diversification rates.  
517 *Bioinformatics* **32**, 789-791, doi:10.1093/bioinformatics/btv651 (2016).
- 518 53 Rabosky, D. L. Automatic detection of key innovations, rate shifts, and diversity-  
519 dependence on phylogenetic trees. *PLOS One* **9**, e89543,  
520 doi:10.1371/journal.pone.0089543 (2014).
- 521 54 Rabosky, D. L. *et al.* BAMMtools: an R package for the analysis of evolutionary  
522 dynamics on phylogenetic trees. *Methods Ecol Evol* **5**, 701-707, doi:10.1111/2041-  
523 210X.12199 (2014).
- 524 55 Revell, L. J. phytools: an R package for phylogenetic comparative biology (and other  
525 things). *Methods Ecol Evol* **3**, 217-223, doi:10.1111/j.2041-210X.2011.00169.x (2012).

526 56 Harmon, L. J., Weir, J. T., Brock, C. D., Glor, R. E. & Challenger, W. GEIGER:  
527 investigating evolutionary radiations. *Bioinformatics* **24**, 129-131,  
528 doi:10.1093/bioinformatics/btm538 (2008).  
529

530

531

## 531 **Acknowledgements**

532

---

533 We thank Julie Johnson for the fish illustrations in Figs. 1,2 and Supplementary Fig. 29, and the  
534 numerous undergraduate and graduate researchers from the University of California, Davis and  
535 Clemson University that helped collect morphological data. Portions of this research were  
536 conducted with high performance computational resources provided by Louisiana State  
537 University (<http://www.hpc.lsu.edu>). We are grateful to the ichthyology curators and staff of the  
538 following collections for granting access to the tissues and specimens that made this study  
539 possible: Smithsonian National Museum of Natural History (Washington, D.C.), University of  
540 Florida Museum of Natural History (Gainesville), Scripps Institution of Oceanography (La  
541 Jolla), South African Institute for Aquatic Biodiversity (Grahamstown), Southeastern Louisiana  
542 University Museum of Biology (Hammond), American Museum of Natural History (New York),  
543 Australian Museum (Sydney), Academy of Natural Sciences (Philadelphia), Field Museum of  
544 Natural History (Chicago), California Academy of Sciences (San Francisco), Cornell University  
545 Museum of Vertebrates (Ithaca), University of Tennessee David A. Etnier Ichthyological  
546 Collection (Knoxville), Burke Museum of Natural History and Culture (Seattle), Academia  
547 Sinica, Biodiversity Research Museum (Taipei), Natural History Museum and Institute (Chiba),  
548 Australian National Fish Collection (Hobart), Kyoto University Museum, Mie University Fish  
549 Collection of the Fisheries Research Laboratory (Shima), Hokkaido University Museum  
550 (Sapporo), Illinois Natural History Survey (Champaign), Kagoshima University Museum

551 (Korimoto), University of Kansas Biodiversity Institute (Lawrence), Natural History Museum of  
552 Los Angeles County, Universidade Estadual Paulista (São Paulo), Louisiana Museum of Natural  
553 History (Baton Rouge), Harvard Museum of Comparative Zoology (Cambridge), Museo  
554 Nacional de Ciencias Naturales (Madrid), Museo Nacional de Historia Natural (Santiago), North  
555 Carolina Museum of Natural Sciences (Raleigh), National Museum of Natural History (New  
556 Delhi), Museum of New Zealand Te Papa Tongarewa (Wellington), Museum Victoria  
557 (Melbourne), National Museum of Nature and Science (Tokyo), Museums and Art Galleries of  
558 the Northern Territory (Darwin), University of Tokyo Ocean Research Institute, Queensland  
559 Museum (Brisbane), Royal Ontario Museum (Toronto), Seikai National Fisheries Research  
560 Institute (Nagasaki), Universitetsmuseet i Bergen (Hordaland), University of Copenhagen  
561 Zoological Museum, and Peabody Museum of Natural History (New Haven).

562

### 563 **Funding**

564 Authors were independently funded by the National Institute of Health Predoctoral Training  
565 Program in Genetics T32 GM 007499 (to AG), the Bingham Oceanographic Fund maintained by  
566 the Peabody Museum of Natural History, Yale University (to TJN), the Australian Research  
567 Council DECRA Fellowship DE170100516 (to PFC), startup funds from Louisiana State  
568 University (to BCF), and the following National Science Foundation grants: NSF DEB-1556953  
569 (to SAP and PCW), NSF DEB-1655624 (to BCF), NSF DEB-1701323 (to PC and WBL), NSF  
570 DEB-1830127 (to SAP), NSF DEB-1839915, and NSF IOS-1755242 (to AD).

571

572

573



## 574 **Author contributions**

575  
576 The project was conceived and designed by TJN, AG, RCH, JRG, BCF, and PCW. AG, RCH,  
577 JRG, MAC, JCB, WTM, WBL, BCF, PFC and TJN organized and executed the collection of  
578 UCE sequence data. SAP, SFT, and PCW coordinated and collected morphological data. AG,  
579 RCH, BCF, and AD carried out phylogenetic analyses. AG and RCH performed phylogenetic  
580 divergence dating analyses, and AG performed analyses of lineage diversification rates. EDB  
581 and PCW performed morphological comparative analyses. AG, RCH, AD, and TJN wrote the  
582 first draft of the manuscript. All authors contributed to the writing of the final draft of the  
583 manuscript.

584

## 585 **Ethics declarations**

586  
587 **Competing interests**

588 The authors declare no competing interests.

589

## 590 **Additional information**

591  
592 **Supplementary Information** is available for this paper.

593 Correspondence and requests for materials should be addressed to [ava.ghezelayagh@yale.edu](mailto:ava.ghezelayagh@yale.edu).

594 Reprints and permissions information is available at [www.nature.com/reprints](http://www.nature.com/reprints).

595

## 596 **Extended data table and figure legends**

597  
598 The Extended Data table and figures (with legends) are available in the document labelled

599 ExtendedDataTableAndFigs.pdf, but legends are also provided below.

600

601

### Extended Data Table 1: Pairwise comparisons of 8 birth-death (BD) branching process models.

| Model 1 (Null)                                     | Model 2 (Alternative)                              | 2ln(BF)  |
|----------------------------------------------------|----------------------------------------------------|----------|
| Constant BD Uniform Sampling                       | Mass Extinction BD Diversified Sampling            | 55,487.1 |
| Episodic BD (shift at 50 mya) Uniform Sampling     | Mass Extinction BD Diversified Sampling            | 55,480.7 |
| Decreasing Speciation Rate BD Uniform Sampling     | Mass Extinction BD Diversified Sampling            | 55,477.2 |
| Episodic BD (shift at 50 mya) Diversified Sampling | Mass Extinction BD Diversified Sampling            | 54,609.6 |
| Decreasing Speciation Rate BD Diversified Sampling | Mass Extinction BD Diversified Sampling            | 50,634.5 |
| Constant BD Diversified Sampling                   | Mass Extinction BD Diversified Sampling            | 49,838.1 |
| Constant BD Uniform Sampling                       | Mass Extinction BD Uniform Sampling                | 29,863.0 |
| Episodic BD (shift at 50 mya) Uniform Sampling     | Mass Extinction BD Uniform Sampling                | 29,856.6 |
| Decreasing Speciation Rate BD Uniform Sampling     | Mass Extinction BD Uniform Sampling                | 29,853.1 |
| Episodic BD (shift at 50 mya) Diversified Sampling | Mass Extinction BD Uniform Sampling                | 28,985.5 |
| Mass Extinction BD Uniform Sampling                | Mass Extinction BD Diversified Sampling            | 25,624.1 |
| Decreasing Speciation Rate BD Diversified Sampling | Mass Extinction BD Uniform Sampling                | 25,010.4 |
| Constant BD Diversified Sampling                   | Mass Extinction BD Uniform Sampling                | 24,214.0 |
| Constant BD Uniform Sampling                       | Constant BD Diversified Sampling                   | 5,649.0  |
| Episodic BD (shift at 50 mya) Uniform Sampling     | Constant BD Diversified Sampling                   | 5,642.6  |
| Decreasing Speciation Rate BD Uniform              | Constant BD Diversified Sampling                   | 5,639.1  |
| Constant BD Uniform Sampling                       | Decreasing Speciation Rate BD Diversified Sampling | 4,852.6  |
| Episodic BD (shift at 50 mya) Uniform Sampling     | Decreasing Speciation Rate BD Diversified Sampling | 4,846.2  |
| Decreasing Speciation Rate BD Uniform Sampling     | Decreasing Speciation Rate BD Diversified Sampling | 4,842.7  |
| Episodic BD (shift at 50 mya) Diversified Sampling | Constant BD Diversified Sampling                   | 4,771.5  |
| Episodic BD (shift at 50 mya) Diversified Sampling | Decreasing Speciation Rate BD Diversified Sampling | 3,975.1  |
| Constant BD Uniform Sampling                       | Episodic BD (shift at 50 mya) Diversified Sampling | 877.5    |
| Episodic BD (shift at 50 mya) Uniform Sampling     | Episodic BD (shift at 50 mya) Diversified Sampling | 871.1    |
| Decreasing Speciation Rate BD Uniform Sampling     | Episodic BD (shift at 50 mya) Diversified Sampling | 867.6    |
| Decreasing Speciation Rate BD Diversified Sampling | Constant BD Diversified Sampling                   | 796.4    |
| Constant BD Uniform Sampling                       | Decreasing Speciation Rate BD Uniform Sampling     | 9.9      |
| Constant BD Uniform Sampling                       | Episodic BD (shift at 50 mya) Uniform Sampling     | 6.4      |
| Episodic BD (shift at 50 mya) Uniform Sampling     | Decreasing Speciation Rate BD Uniform Sampling     | 3.5      |

TESS calculated Bayes Factors (2ln(BF)) from the pairwise comparisons of marginal likelihoods for 8 birth-death (BD) branching-process models with the following priors: 1.) constant diversification rate with uniform (random) sampling, 2.) constant diversification rate with diversified sampling (i.e. sampling results in even coverage of all clades), 3.) decreasing speciation rate with uniform sampling, 4.)

decreasing speciation rate with diversified sampling, 5.) constant diversification rate with a rate shift 50 Mya (“Episodic BD”) with uniform sampling, 6.) constant diversification rate with a rate shift 50 Mya (“Episodic BD”) with diversified sampling, 7.) constant speciation rate with a single mass extinction event occurring at any point in time (“Mass Extinction BD”) with uniform sampling, and 8.) constant speciation rate with a single mass extinction event occurring at any point in time (“Mass Extinction BD”) with diversified sampling. Observations of the pairwise comparisons note strong preference for a model that assumes uniform (random) sampling and strong support for either a constant rate BD model, or an episodic BD model that assumes a shift 50 mya. There is moderate Bayesian support ( $2\ln(\text{BF}) = 6.4$ ) that among the models assuming uniform sampling, the constant rate model is preferred over the model with a shift 50 Mya.

## Extended Data Fig. 1: Bayesian concordance analyses used to compare alternative phylogenetic hypotheses concerning the sister taxa of 3 major acanthomorph lineages.

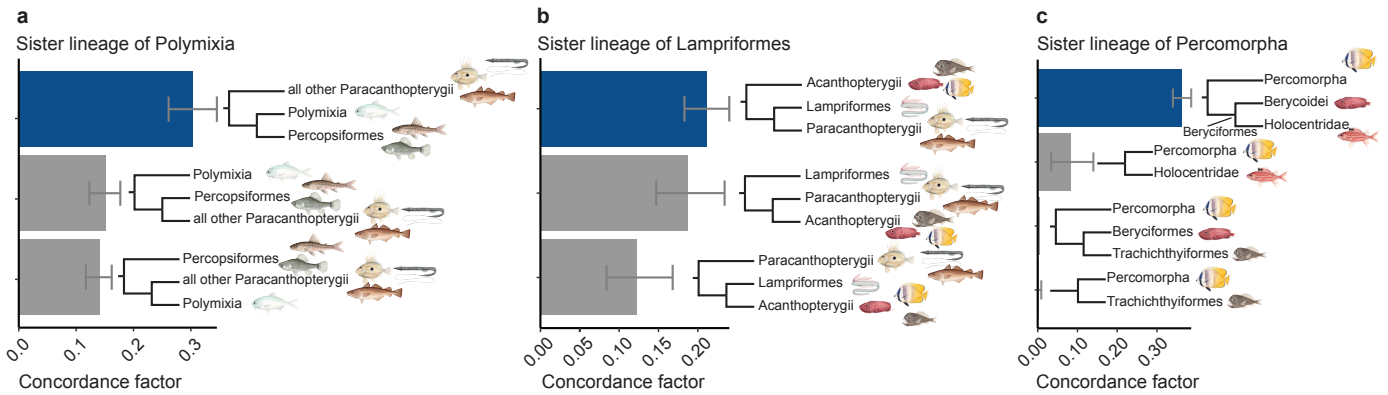

BUCKy-inferred genome-wide concordance factor estimates, with 95% confidence intervals, representing the proportion of gene trees exhibiting alternative topologies among major acanthomorph lineages. Blue bars reflect the concordance factor for the topology inferred in our concatenated analyses (see Figs. 1,2) and gray bars represent concordance factors of alternative topologies not observed in the concatenated phylogeny. **a**, Gene tree concordance for Percopsiformes, Polymixia, and all other Paracanthopterygii; **b**, Lampriformes, Paracanthopterygii, and Acanthopterygii; **c**, Alternative sister lineages of Percomorpha.

**Extended Data Fig. 2: Acanthomorphs underwent a long, steady period of increased taxonomic family origination beginning at the K-Pg boundary.**

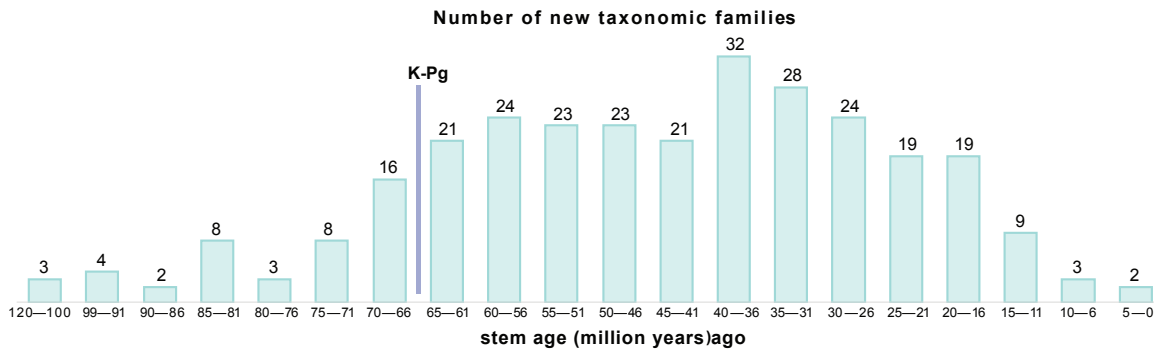

The bar plot of the estimated number of new taxonomic families originating during 5 million year bins. Note that the amounts of time represented by the first two bars are greater than the 5 million years represented by all other bars.

### Extended Data Fig. 3: TESS-CoMET analyses indicate constant tree-wide diversification rates through most of the history of Acanthomorpha.

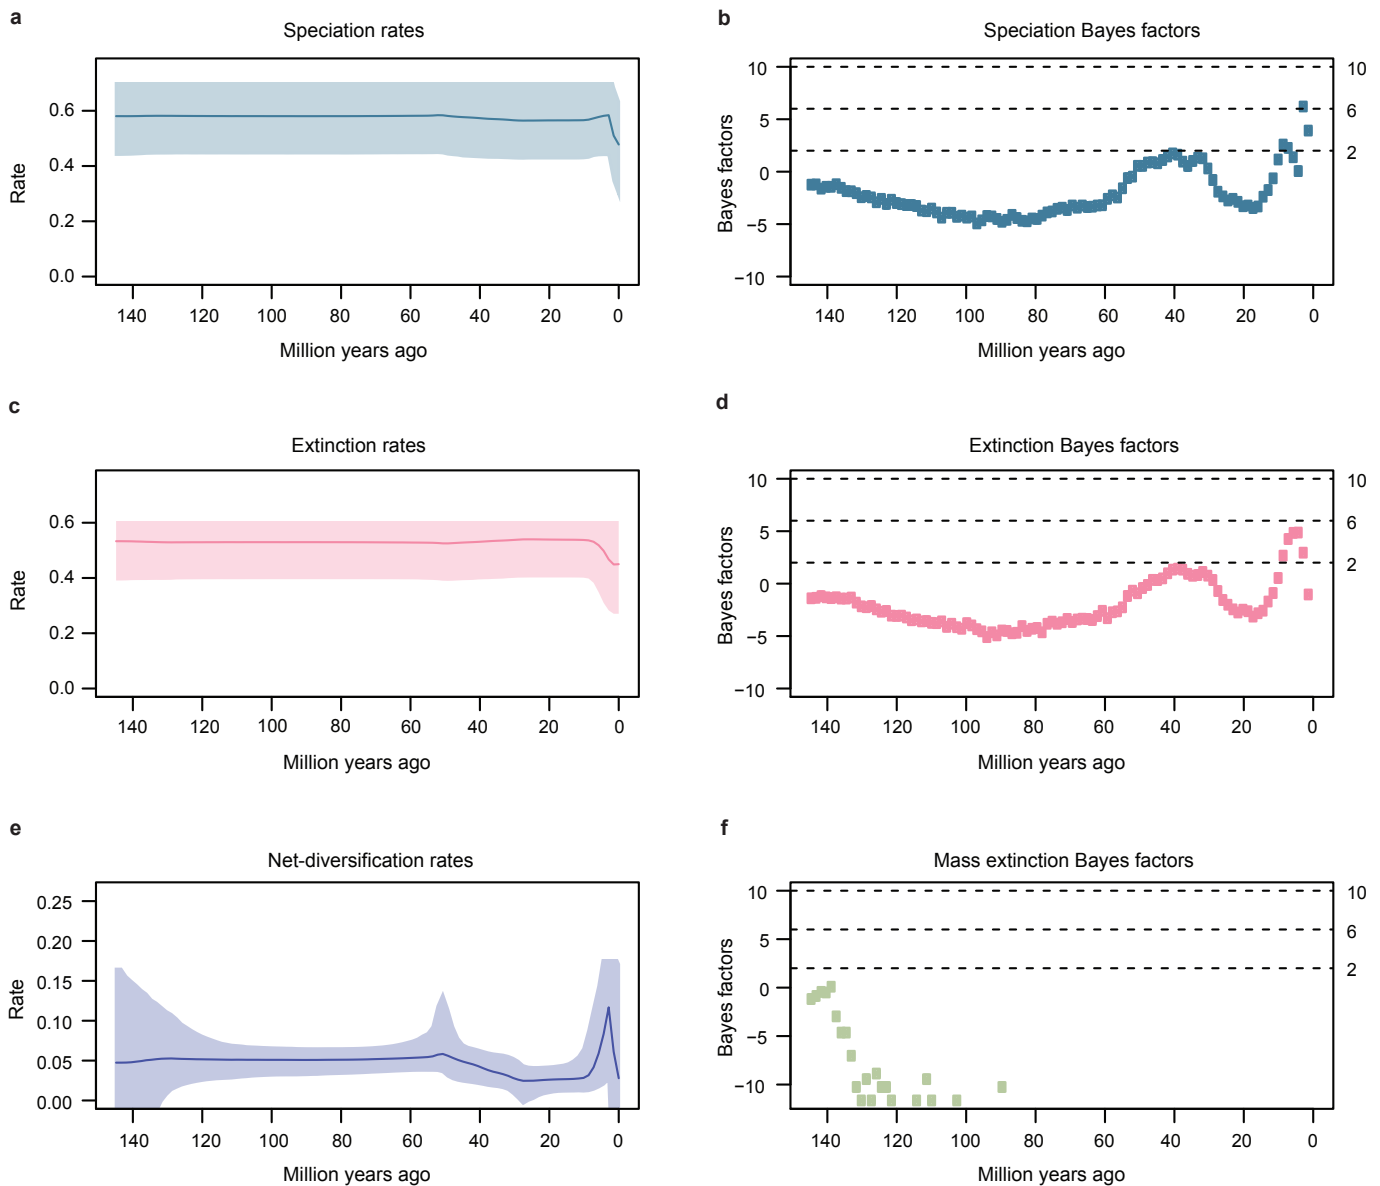

In **b**, **d**, and **e**, horizontal dashed lines and the right-hand y-axis mark statistical support cutoffs for rate shifts, with  $2 \leq \text{BF} < 6$  considered to be low support,  $6 \leq \text{BF} < 10$  considered to be moderate support and  $\geq 10$  considered to be high support. The rate shifts observed in **a**, **c**, and **e** over the last 10 million years are likely an artifact of the CoMET model (see **Supplementary Information** for further discussion). **a**, Speciation rate estimates through time for Acanthomorpha. **b**, Bayes factors (BF) support for a shift in speciation rate at every 1 Myr time period. **c**, Extinction rates through time for Acanthomorpha. **d**, Bayesian support (in Bayes factors) for a shift in extinction rate at every 1 Myr time period. **e**, Net-diversification (speciation minus extinction) rates through time for Acanthomorpha. Though this plot suggests that there is a small shift in net-diversification rate  $\sim 50$  Mya, there is no statistical support for such a shift (see **b** and **d**). **f**, There is no statistical support (in Bayes factors) for a mass extinction event in Acanthomorpha at any 1 Myr time period.

### Extended Data Fig. 4: Visual summary of shifts in speciation rates inferred using BAMM.

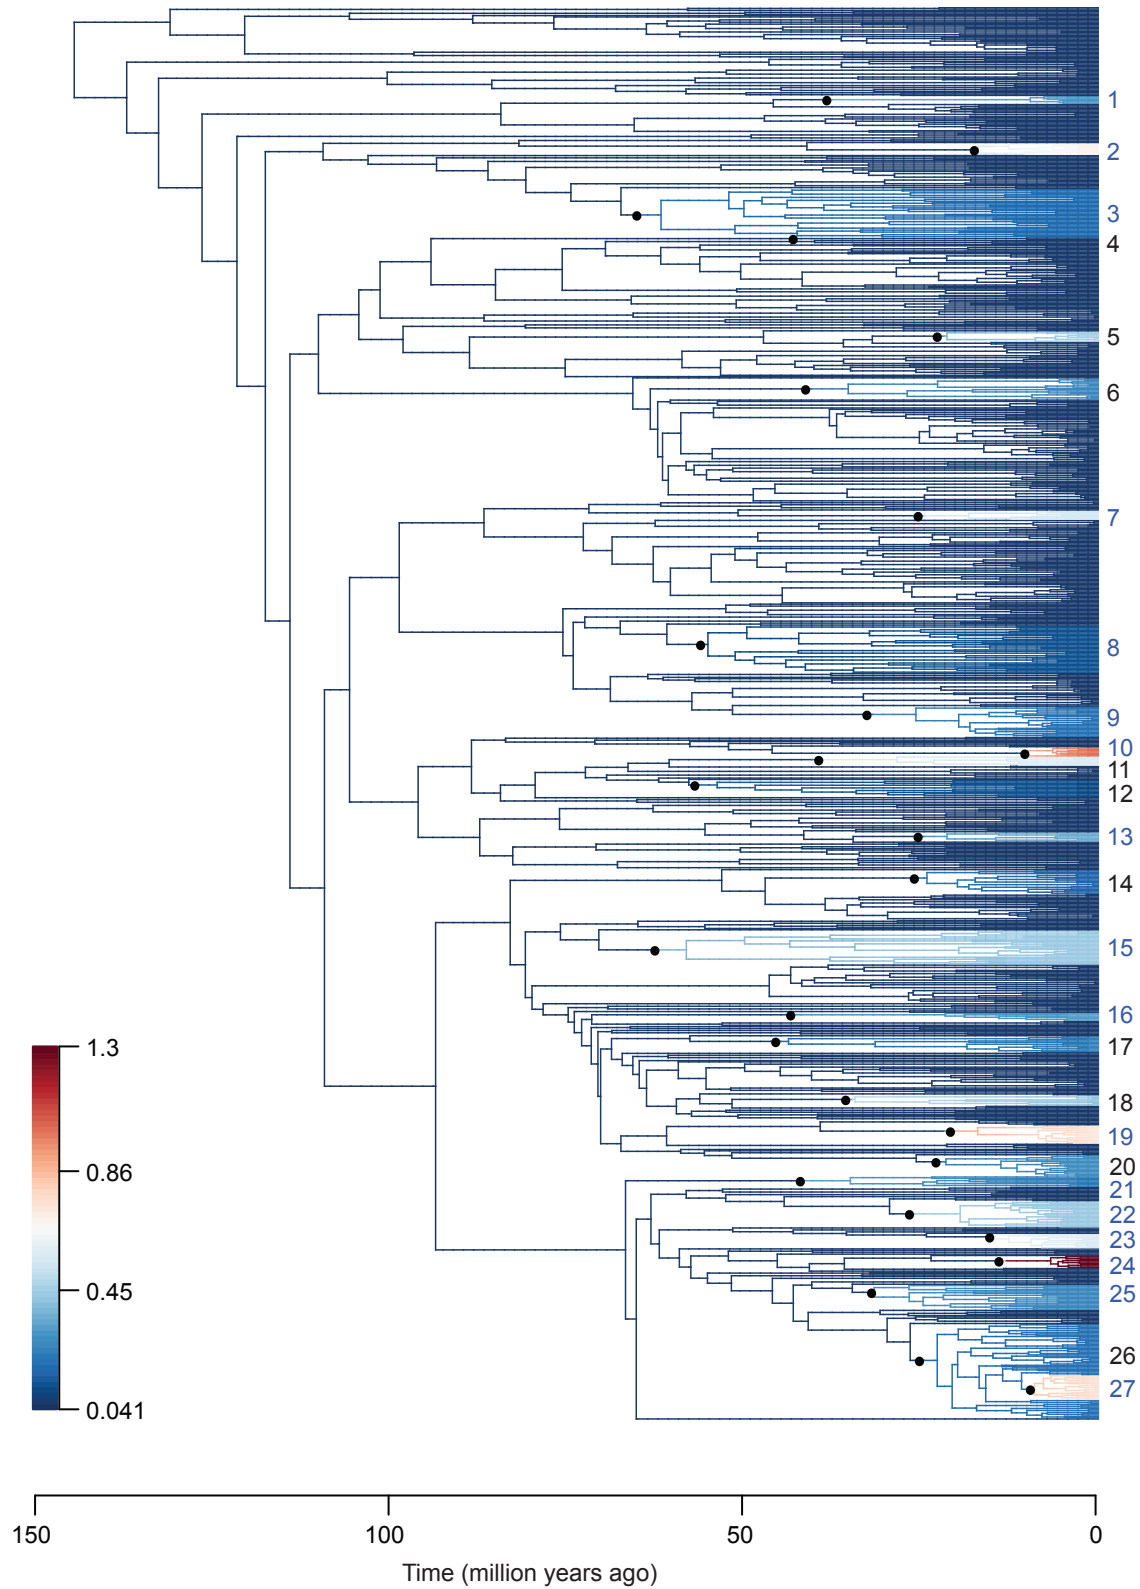

The configuration presented here is the maximum shift credibility (MSC) configuration for an analysis that expected 15 rate shifts under the prior. Darker pink colors depict relatively fast rates, while darker green colors depict relatively slow rates. Rate shifts along branches are denoted with filled, black circles and assigned identifying numbers. Shifts in speciation rate are estimated to have occurred on the branches leading to the following 27 clades: 1.) Dinematchthyidae, 2.) Apogonidae (to the exclusion of Pseudamia), 3.) Gobiidae and Oxudercidae, 4.) Solenostomus, 5.) Parupeneus and Pseudopeneus (in Mullidae), 6.) Ariomma, Nomeidae and Stromateidae, 7.) Mastacembelidae, 8.) the clade defined by Scopthalmidae and Soleidae, 9.) Carangidae (to the exclusion of *Seriola*), 10.) Pseudocrenilabrinae (in Cichlidae), 11.) Pomacentridae, 12.) the clade defined by Gobiesocidae and Dactyloscopidae, 13.) Poeciliidae, 14.) the clade defined by Scorpidae and Terapontidae, 15.) Labridae, 16.) Sciaenidae, 17.) the clade defined by Nemipteridae and Sparidae, 18.) Tetraodontidae, 19.) Chaetodontidae, 20.) Acanthuridae (to the exclusion of *Prionurus* and *Naso*), 21.) Anthiinae and Epinephelidae, 22.) darters (Etheostomatinae), 23.) the clade defined by “Nototheniidae” and Channichthyidae, 24.) *Sebastes*, 25.) the clade defined by Trichodontidae and Psychrolutidae, 26.) the clade defined by Stichaeidae and Zoarcidae and 27.) the clade defined by *Bothrocara* and *Lycodes concolor* (in Zoarcidae). Shifts labelled with blue rather than black numbers are estimated to have occurred by 16 of the 23 BAMM analyses conducted in this study. Although shift number 20 and shift number 26 are labelled in black, the vast majority of BAMM analyses predicted a rate shift in branches leading to slightly more inclusive clades (specifically Acanthuridae minus *Naso*, and all of Lycodinae, respectively).



## Extended Data Fig. 5: Changes in body elongation and compression.

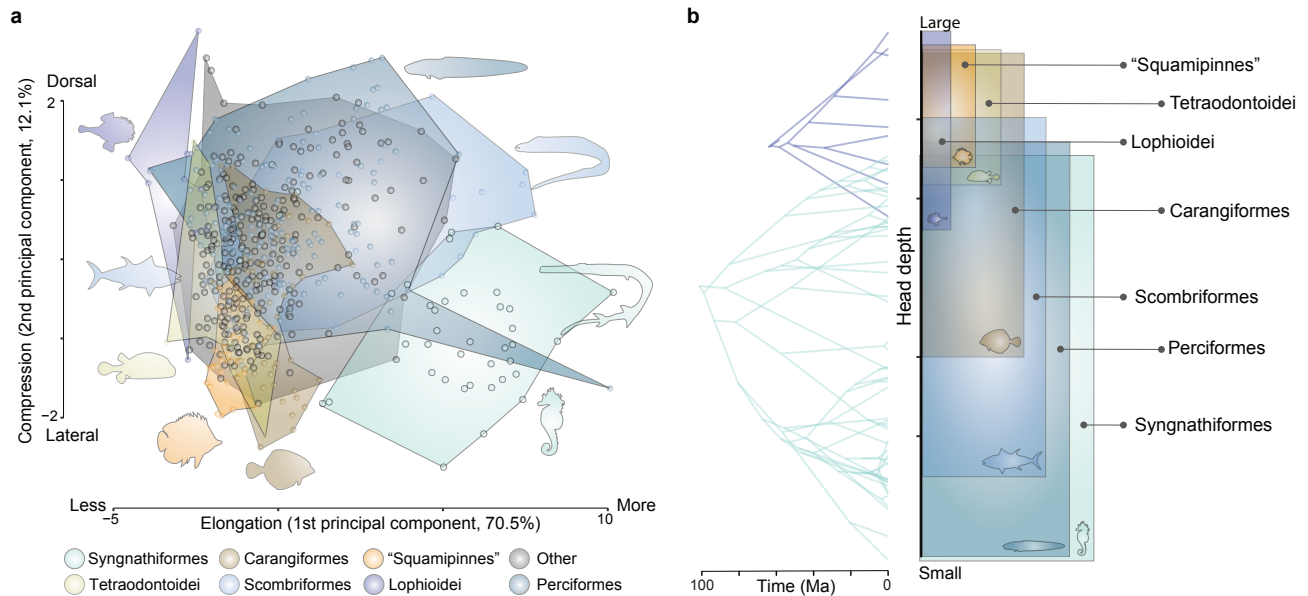

Patterns of acanthomorph morphological disparification. **a**, The first two principal components of morphospace (elongation and compression), with seven major acanthomorph lineages color-coded by taxon. The proportion of variance explained by PC1 is 70.5% and by PC2 is 12.1%. **b**, Phenogram depicting the evolutionary history of head depth—which often reflects body elongation—across seven major lineages that arose around the K-Pg. Note that all major lineages except Syngnathiformes originate near the K-Pg boundary, but “Squamipinnes”, Lophioidei and Tetraodontoidei have markedly different ancestral trait values from Carangiformes, Scombriformes and Perciformes.

## Extended Data Fig. 6: Robustness of DTT analyses.

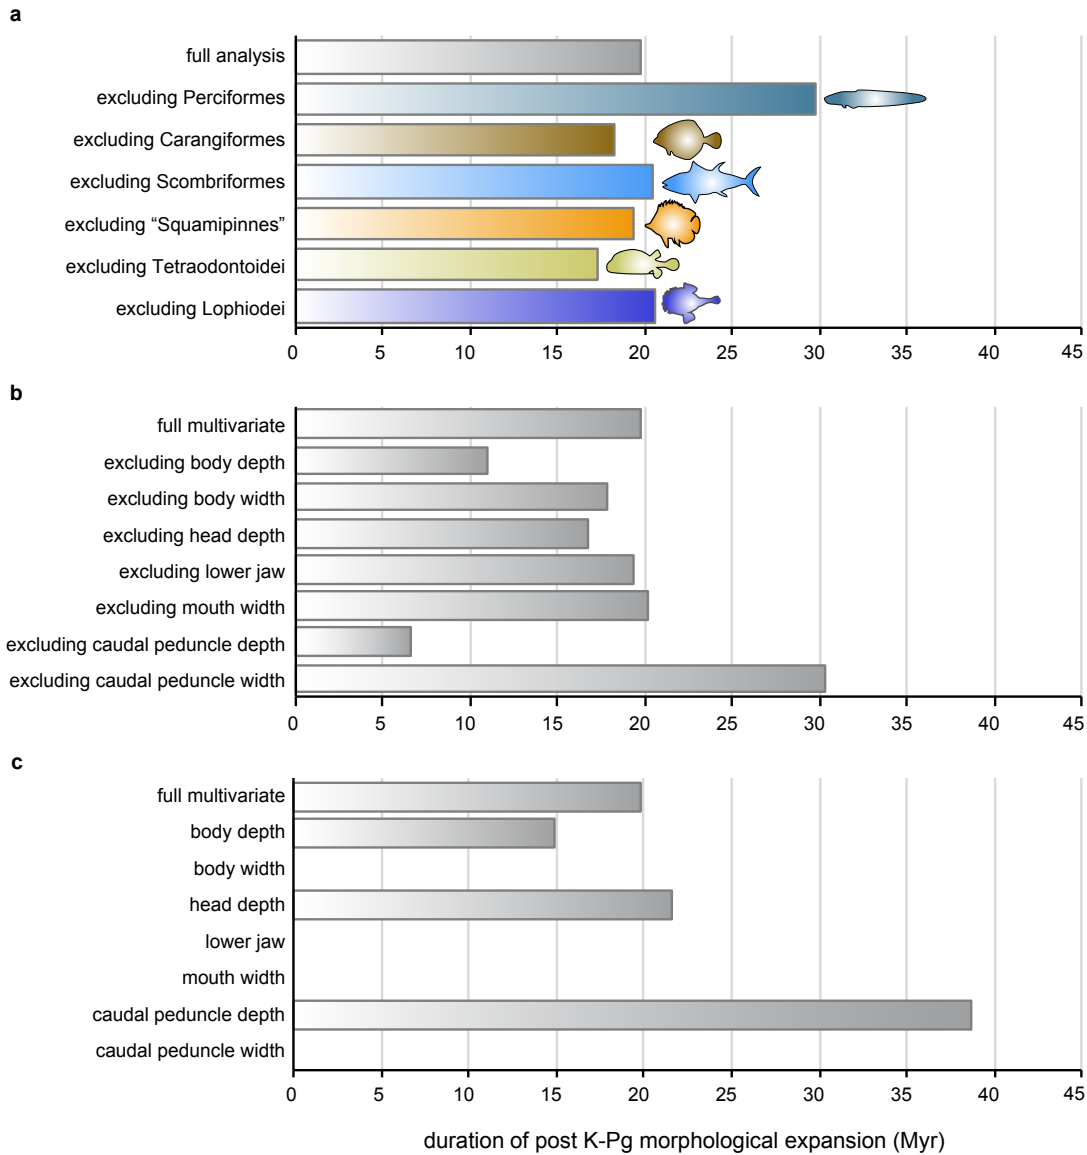

Effect of individual lineages or body shape traits on the length of the estimated period of between-clade morphological expansion after the K-Pg (i.e., the period in which the observed disparity falls below that expected from a Brownian motion process). There is no single major lineage driving the extended duration of this period of phenotypic diversification, but the body shape traits related to elongation (body depth, head depth, and caudal peduncle depth) have more pronounced contributions to this pattern than the other body shape traits. **a**, Duration of the period of morphological expansion when a single major lineage is excluded from the analysis. **b**, Duration of the period of morphological expansion when data for one of the seven body shape traits in the original analysis is excluded. **c**, Duration of the period of morphological expansion when the DTT analysis is based on a single body shape trait.

## 1 **1. Supplementary Methods**

2

### 3 ***a. Taxon sampling***

4 The phylogenetic analyses included UCE sequence data sampled from 1,109 specimens that  
5 include 1,084 species. For this study, we collected new UCE sequence data from 653 specimens.  
6 We retrieved UCE loci from the remaining 456 specimens at NCBI from previous studies of  
7 acanthomorph phylogeny<sup>4,29,48,57,58</sup> or from whole genomic data (Supplementary Table 1). This  
8 study included representatives of all currently recognized acanthomorph taxonomic orders, 307  
9 of the 331 (92.7%) described taxonomic families of Acanthomorpha and 276 of the 290 (95.2%)  
10 families of Percomorpha<sup>3</sup>. Based on previous phylogenetic analyses<sup>15,20</sup>, we sampled two species  
11 of Aulopiformes and seven species of Myctophiformes as outgroups for the phylogenetic  
12 analyses: *Notolepis coatsi*, *Alepisaurus ferox*, *Scopelengys tristis*, *Neoscopelus macrolepidotus*,  
13 *Neoscopelus microchir*, *Dasyscopelus selenops*, *Benthoosema glaciale*, *Notoscopelus*  
14 *caudispinosus*, and *Ceratospelus warmingii*. We sampled phenotypic data from 680 of the  
15 1,075-acanthomorph species sampled in the UCE inferred phylogeny. We inferred phylogenies  
16 from the UCE dataset for an inclusive taxon sampling of 1,084 species and for a set of 702  
17 species that included the 680 for which corresponding morphological data was obtained. We  
18 refer to these UCE datasets and resulting phylogenies as the 1,084 and 702 species datasets and  
19 trees, respectively.

20

### 21 ***b. Library preparation, target enrichment, and sequencing***

22 We isolated DNA from tissue biopsies using Qiagen DNeasy Blood and Tissue kits following the  
23 manufacturer's protocol. We used a Qubit fluorometer (Life Technologies) to quantify 1-2 uL of  
24 all DNA extractions. We sheared approximately 500 ng of genomic DNA from each sampled  
25 specimen using a QSonica Q800R3 sonicator to obtain fragment sizes between 300-600 bp. For  
26 library preparation and target enrichment of UCE loci, we followed protocols described in a  
27 previous study<sup>4</sup> using Kapa HyperPrep kits (Kapa Biosystems) and Illumina TruSeq iTru5 and  
28 iTru7 adapters for dual indexing of genomic libraries<sup>59</sup>. We used a bait set from Arbor  
29 Biosciences designed to target 1,314 UCE loci in acanthomorph fishes for target-enrichment of  
30 UCE loci<sup>4</sup>. Enriched libraries were sequenced using 150 bp paired-end sequencing on Illumina  
31 HiSeq platforms.

### 32 ***c. Assembly and alignment construction***

33 To process raw read data, construct assemblies, identify UCE sequences, and construct  
34 alignments for each UCE locus, we used the PHYLUCE computer package<sup>35,36</sup>, which uses  
35 parallel wrapper functions around external programs to perform tasks required to process high-  
36 throughput DNA sequence data. We used the illumiprocessor parallel wrapper program  
37 (<https://github.com/faircloth-lab/illumiprocessor>) to implement Trimmomatic<sup>60</sup>, which removes  
38 adapter index sequences and low-quality bases from demultiplexed raw reads. We constructed  
39 assemblies for each sample using *trinity* v.r2013-02-25<sup>61</sup> and used the PHYLUCE program  
40 `phyluce_assembly_match_contigs_to_loci.py` to identify which assembled contigs represented  
41 UCE sequences by matching them to a FASTA file containing the UCE bait sequences.

42 To supplement these sequence data, we extracted UCE loci from existing genomes of 96  
43 species (Supplementary Table 1). We downloaded genomes from NCBI and converted to 2bit  
44 format using `faToTwoBit` from the UCSC Genome Browser Downloads  
45 (<https://hgdownload.cse.ucsc.edu/admin/exe/>). Then, we located UCE loci in each genome  
46 assembly by running the PHYLUCE program `run_multiple_lastzs_sqlite.py` with default  
47 parameters and the FASTA file containing the UCE bait sequences. We extracted from each  
48 assembly identified UCE loci along with  $\pm 500$  bp of sequence from each flank using  
49 `phyluce_probe_slice_sequence_from_genomes.py` with default parameters. We used PHYLUCE  
50 to run `match_contigs_to_loci.py` against the extracted loci, before the UCE data harvested from  
51 genome assemblies were integrated with the UCE loci enriched from libraries.

52 We integrated these two data sets and used PHYLUCE programs to infer a separate set of  
53 alignments and phylogenies for the 702 species including the sampling of morphological data  
54 and the full 1,109 specimen sampling using the same protocols. We generated alignments for  
55 each UCE locus using MAFFT v7.130b<sup>41</sup> and trimmed with trimAL v1.4.rev<sup>62</sup>. For further  
56 downstream phylogenetic analyses, we retained UCE loci that included at least 75% of the total  
57 specimens in both the 1,084 and 702 species datasets.

58

### 59 ***d. Phylogenetic analyses***

60 We inferred phylogenies for both the 1,084 and 702 species datasets using maximum likelihood  
61 methods as implemented in IQ-TREE v. 1.7<sup>37</sup> and RAxML-ng 0.9.0<sup>38</sup>. In IQ-TREE, we ran tree  
62 searches using ultrafast bootstrap approximation until 1,000 bootstrap replicates and 1,000

63 replicates of the Shimodaira-Hasegawa approximate likelihood ratio test (SH-aLRT) were  
64 generated<sup>63</sup>. Phylogenies inferred in IQ-TREE using the unpartitioned alignments described  
65 above served as the topological constraints for subsequent divergence time analyses. Maximum  
66 likelihood tree searches conducted in IQ-TREE used the ModelFinderPlus<sup>64</sup> option, which  
67 applies a relaxed hierarchical clustering search algorithm to determine partitioning schemes and  
68 models of molecular evolution.

69 Before conducting analyses in RAxML-ng v0.9.0<sup>38</sup>, we determined partitioning schemes  
70 using PartitionFinder2 v2.1.1<sup>49</sup>, with units of partitioning based on individual UCE loci. We  
71 identified these partitioning schemes using a relaxed hierarchical clustering search algorithm  
72 with a maximum cluster size set to 1000 data blocks, the Bayesian Information Criterion method  
73 for partition model comparison, and GTR+Gamma as the model of molecular evolution. We  
74 removed all fully undetermined columns from our partitioned, concatenated alignment using  
75 RAxML-ng, compressed the alignment, and converted to binary. We performed maximum  
76 likelihood tree searches on these alignments using the extended majority rule criterion method  
77 implemented with the autoMRE command to continue bootstrapping until convergence.

78 We compared the tree topologies inferred in the concatenated analyses described above  
79 using the program TOPD\_v4.6<sup>39</sup>. Phylogenies based on the 1,084 species dataset (IQ-TREE  
80 single-partition, IQ-TREE multiple partitions, and RAxML-ng multiple partitions) were  
81 compared to one another, and separate analyses compared the three phylogenies inferred from  
82 the 702 species dataset. We utilized TOPD to calculate partition metrics, i.e., TOPD's "Split"  
83 method<sup>65</sup>, and path length metrics, i.e., TOPD's "Nodal" method<sup>66</sup>. We produced lists of taxa  
84 with different phylogenetic positions among the compared trees using TOPD's "Disagree"  
85 method, which removes a single taxon at each iteration and calculates the reduction in trees' split  
86 distance.

87 We inferred a summary species tree in ASTRAL-III v5.6.3<sup>42</sup>, using maximum likelihood  
88 gene trees for each UCE locus generated with IQ-TREE v 1.6.12. For individual gene tree  
89 inference, we applied the ModelFinder Plus<sup>64</sup> option to determine the optimal model of  
90 molecular evolution as well as the ultrafast bootstrap approximation with a maximum of 10,000  
91 bootstrap iterations. We used TreeShrink<sup>40</sup> to identify abnormally long branch lengths in the  
92 individual UCE gene trees and to minimize the impact of misspecified sequences. We used a  
93 false positive tolerance rate parameter (alpha) of 0.05 in our TreeShrink filtering to automate the

94 removal of potentially aberrant sequences from the UCE alignment. We re-aligned the  
95 TreeShrink-pruned alignments using MAFFT v7.130b<sup>41</sup> and re-inferred gene trees using IQ-  
96 TREE, as above. We used these gene trees to infer a species tree in ASTRAL-III.

97

#### 98 *e. Concordance factor analyses*

99 We used BUCKy<sup>44</sup> to estimate genome-wide concordance factors, which allows the evaluation  
100 of phylogenetic discordance among individual UCE gene trees. We compared alternative  
101 phylogenetic hypotheses among the major lineages of Acanthomorpha using these concordance  
102 factors. BUCKy estimates the frequency of topological partitions that occur in a sample of  
103 Bayesian gene tree posterior distributions and provides an estimate for their genome-wide  
104 frequency and 95% confidence intervals. Because the number of possible topological  
105 relationships among taxa increases non-linearly as the number of species included in the analysis  
106 increases, large taxonomic datasets are intractable for thorough concordance factor analyses with  
107 BUCKy. We therefore used a reduced taxonomic dataset of 82 species that represent each of the  
108 major subclades of Acanthomorpha to reduce computational burden. For this reduced dataset, we  
109 generated alignments of the 82 species using MAFFT (**Supplementary Table 1**). We used  
110 MrBayes v. 3.2.7<sup>43</sup> to infer a Bayesian gene tree distributions for each UCE locus. We ran  
111 MrBayes analyses with a GTR+Gamma molecular evolutionary model for 2 million generations,  
112 with trees sampled every 2,000 generations. Using the BUCKy program mbsum, we discarded  
113 the first 75% of sampled trees from the posterior sample of each UCE locus as burnin,  
114 summarized branching patterns in the remaining post-burnin posterior distribution, and used an  
115 alpha value of 1.0 for concordance factor estimation. These gene tree posterior distributions were  
116 then used for subsequent BUCKy estimation of concordance factors.

117

#### 118 *f. Divergence-time estimation*

119 We estimated divergence times for both the 702 and 1,084 species phylogenies using BEAST  
120 v.2.5<sup>45</sup> following a protocol used in other UCE studies where BEAST analyses were run using  
121 reduced datasets of 30 UCE loci<sup>29,48,67</sup>. We constrained the phylogeny used in the BEAST runs  
122 using the IQ-TREE analyses of the 1,084 and 702 species datasets. For both the 1,084 and 702  
123 species datasets, we performed BEAST analyses on three different sets of 30 loci, each randomly  
124 drawn without replacement from the entire set of ~1,000 UCE loci. Exploratory BEAST analyses

125 using sets of 25 and 50 loci yielded similar divergence time estimates, justifying the moderately  
126 computationally expensive analyses using the 30 locus datasets. For each subset of 30 loci, we  
127 determined the optimum partitioning scheme using the relaxed hierarchical clustering algorithm  
128 in PartitionFinder2 v. 2.1.1<sup>49</sup>. For divergence dating analyses performed in BEAST, we  
129 employed a relaxed lognormal clock model and a birth-death tree model. We assigned minima  
130 for age priors using forty-three fossil occurrences, described below. For each 30-locus dataset,  
131 we ran at least three replicate analyses for a minimum of 200 million generations beyond a total  
132 burnin of 200 million generations. As MCMC chains progressed, we accepted suggestions  
133 provided by BEAST for improving operators' tuning parameter values. We used Tracer v.1.7.1  
134 to observe effective sample size (ESS) values for posterior parameter estimates, to assess  
135 convergence among replicate MCMC chains, and to check for directional trends in parameter  
136 estimates<sup>50</sup>. Though the large size of the phylogenies created computational limits that resulted in  
137 moderate ESS values for some parameters, most parameter estimates reached ESS values well  
138 above 200. Some analyses were run up to 900 million generations in length to obtain adequate  
139 ESS values and ensure no directional trends in and unimodal distributions of parameter  
140 estimates. We used LogCombiner in BEAST v.1.8.4<sup>51,68</sup> to remove a burnin, and trees from each  
141 replicate run were randomly thinned. We thinned the sets of 1,084-species trees such that a total  
142 of 1,200 trees would remain across all runs, with an equal number of trees from each replicate  
143 contributing to the final summary trees. We randomly thinned the sets of 702-species trees such  
144 that 10,000 total trees remained across replicate runs. For each set of loci, we used LogCombiner  
145 to combine trees from replicate runs and TreeAnnotator in BEAST v.1.8.4 (Drummond et al.  
146 2012) to estimate maximum clade credibility trees.

147

#### 148 ***g. Diversification rate analyses***

149 We performed diversification rate analyses on the time-calibrated 1,084-taxa phylogeny that was  
150 run for the most generations and therefore had the highest ESS values for posterior parameter  
151 estimates. Species diversity of acanthomorph lineages used to determine sampling fractions for  
152 all diversification rate analyses were based on numbers of species presented in Eschmeyer's  
153 Catalog of Fishes<sup>3</sup>, which at the time of the analyses included 19,219 species of Acanthomorpha.  
154 We removed all outgroups and duplicate samples of the same species before performing  
155 diversification rate analyses, leaving a phylogeny consisting of 1,075 acanthomorph species and

156 a sampling fraction of 0.056. We performed stepping-stone simulations within TESS<sup>52</sup> to  
157 estimate the marginal likelihoods of eight birth-death models and evaluate their fit to the  
158 acanthomorph time-calibrated phylogeny. Competing models included those with constant  
159 diversification rates, with episodically changing rates, or with decreasing speciation rates.  
160 Variants of the constant rate model with and without a mass extinction event were also tested to  
161 assess the potential impact of the K-Pg mass extinction on acanthomorph diversification. We  
162 tested variants of the competing models that accommodated the effects of incomplete taxon  
163 sampling by correcting for uniform (random) or diversified sampling methods.

164 Using the simulated marginal likelihoods of candidate models, we calculated Bayes  
165 factors and compared the relative fits of models to the acanthomorph phylogeny (Extended Data  
166 Table 1). With the exception of the models assuming a decreasing speciation rate, we ran  
167 stepping-stone simulations for 10,000 iterations with 1,000 power posteriors (stepping stones)  
168 and a burn-in period of 3,000 generations. Due to limited computational resources, we ran the  
169 simulations of marginal likelihoods for the decreasing speciation rate (i.e., continuous) models  
170 for 2,000 iterations (a burn-in of 500 generations was removed) with 100 power posteriors. This  
171 test of relative model fit greatly favored models assuming uniform (random) sampling methods  
172 over diversified methods (Extended Data Table 1), informing our model selection in downstream  
173 TESS analyses.

174 We extracted the three branching process-models that were most favored in the tests of  
175 relative model fit and assessed their absolute fit to the acanthomorph phylogeny using posterior-  
176 predictive simulations. We compared the predictive distributions of the gamma statistic, number  
177 of taxa, and lineage-through-time (LTT) plots to the empirical estimates.

178 We inferred the global speciation, extinction and net-diversification rates through time  
179 using the CoMET model as employed by TESS. For CoMET analyses represented in Extended  
180 Data Fig. 2, we specified a uniform (random) sampling strategy ( $\rho = 0.056$ ), conditioned the  
181 model on taxa survival, discarded a burn-in of 30,000 iterations, and ran three replicate  
182 reversible-jump MCMC chains until the effective sample size (ESS) reached 200 or greater. We  
183 assessed convergence within each CoMET run by calculating the effective sample sizes and  
184 Geweke diagnostics for the diversification rate, and we assessed convergence of multiple runs  
185 using the Rubin-Gelman test.



186 We inferred global diversification rates and examined rate heterogeneity across clades  
187 using BAMM v.2.5.0<sup>53</sup>. Our analyses corrected for incomplete sampling by accounting for the  
188 sampling fractions of 304 major representative clades, most of which are taxonomic families, in  
189 accordance with the number of species described by Eschmeyer's Catalog of Fishes<sup>3</sup>. We also  
190 used the information on species diversity to appropriately adjust these clade-specific sampling  
191 fractions for non-monophyletic taxonomic groups. As in the TESS analyses, we set the global  
192 sampling fraction for all BAMM analyses to 0.056. We identified appropriate rate priors using  
193 the function `setBAMMpriors` in the R package `BAMMtools` v.2.1.6<sup>69</sup>, accounting for incomplete  
194 taxon sampling.

195 We ran Markov chain Monte Carlo simulations for 100 million generations under the  
196 default settings. We also used default settings for MCMC scaling operators and move  
197 frequencies. We ran BAMM 23 times, each time under different conditions that might be  
198 appropriate for a medium-sized tree consisting of ~1,000 taxa. Runs tested different  
199 combinations of numbers of MCMC chains (2 or 4), temperature increment parameters ( $\Delta T =$   
200 0.05 or 0.1) and expected number of diversification rate shifts (1, 5, 10, 15, 20, 25, 30, 35, 40  
201 and 45). We tested the effect of changing the number of expected shifts—despite the  
202 `setBAMMpriors` function in `BAMMtools` recommending an input of just one expected shift—  
203 because preliminary runs suggested that the number of diversification rate shifts is greater than  
204 20. For each analysis, we compared Bayes factors for competing prior models with different  
205 numbers of expected rate shifts.

206

#### 207 ***h. Body shape trait data***

208 We pruned a body trait dataset to the 680 species that matched those in the 702-species UCE  
209 phylogeny<sup>24</sup>. The body shape dataset included maximum body depth, maximum fish width, head  
210 depth, lower-jaw length, mouth width, minimum caudal-peduncle depth, and minimum caudal-  
211 peduncle width. We measured maximum body depth as the maximum linear distance from the  
212 dorsal to ventral margin of the body, anywhere in the region between the posterior edge of the  
213 operculum to the anterior portion of the caudal peduncle. We measured maximum fish width as  
214 the maximum width anywhere along the body. We measured head depth as the vertical distance  
215 from the dorsal to ventral margins of the head passing through the center of the eye. We  
216 measured lower jaw length as the linear distance from the anterior end of the lower jaw to the

217 articular-quadrate joint. We measured mouth width as the linear distance between the left and  
218 right articular-quadrate joints. We measured minimum caudal peduncle depth as the minimum  
219 vertical distance from the dorsal to ventral margin of the caudal peduncle. We measured  
220 minimum caudal peduncle width as the narrowest point along the caudal peduncle. Lastly, we  
221 measured fish standard length as the linear distance from the anterior tip of the upper jaw to the  
222 posterior edge of the hypural plate or to the posterior end of the vertebral column (i.e., in species  
223 that lack a hypural plate). We accounted for size by regressing log-transformed lengths against  
224 log-transformed standard fish length and calculating phylogenetic residuals using the `phyl.resid`  
225 function implemented in PHYTOOLS<sup>55</sup>. We used this matrix of residuals for seven traits for  
226 phylogenetic comparative analyses using a multivariate framework.

227

### 228 *i. Disparity through time analyses*

229 We assessed disparity through time (DTT) using the `dtc` function implemented in GEIGER<sup>56</sup>. We  
230 incorporated uncertainty in divergence times by repeating analyses across 100 trees randomly  
231 sampled from the posterior distribution. Since we were specifically interested in patterns around  
232 and following the K-Pg boundary, we summarized disparity through time in 1 My intervals as  
233 the proportion of trees in which the observed subclade disparity fell below that expected from a  
234 Brownian motion process (i.e., the expected pattern if the clade is undergoing adaptive radiation)  
235 (results in Supplementary Fig. 28). Focusing on the time following the K-Pg boundary, we  
236 statistically summarized the 1 My time interval during which the observed subclade disparity  
237 first dropped below that expected from a Brownian motion process (results in Supplementary Fig.  
238 28). We tested the sensitivity of disparity through time analyses to body shape traits and to the  
239 inclusion of major clades by repeating all analyses to the exclusion of clades that arose  
240 immediately around the K-Pg boundary and to the exclusion of each trait, as well as repeating  
241 the analyses for each trait separately in a univariate framework (results in Extended Data Fig. 6).  
242 We also visualized the evolutionary histories of the following focal lineages using the  
243 phenogram function implemented in PHYTOOLS<sup>55</sup>: Carangiformes, Lophioidei, Perciformes,  
244 Scombriformes, “Squamipinnes” (here defined as the clade containing *Chaetodon kleinii* and  
245 *Luvarus imperialis*), Syngnathiformes, and Tetraodontoidei. We visualized body shape  
246 morphospace using principal component analysis (PCA) with the `prcomp` function. Since the  
247 traits had different variances, we scaled all traits prior to performing PCA.

248 **2. Fossil calibrations for relaxed clock BEAST analyses**

249

250 **i. Node: Stem lineage Lampriformes**, dating the most recent common ancestor (MRCA) of  
251 *Lampris guttatus* and *Stylephorus chordatus*, which is the MRCA of Lampriformes and all other  
252 paracanthopterygians. *First occurrence*: †*Aipichthys minor*. Sannine Limestone, Hadjula,  
253 Lebanon. *Resolution in phylogenetic analyses*: †*Aipichthys minor* is resolved as a lampriform  
254 stem lineage in parsimony analyses of morphological characters<sup>70,71</sup>. *Stratigraphy*: The Hadjula  
255 fish beds are located below reported occurrence of *Mantelliceras mantelli*, which defines the first  
256 complete ammonite zone of the Late Cretaceous. The top of the *Mantelliceras mantelli* Zone is  
257 dated at 98.0 Ma<sup>72</sup>, from which we derive a minimum age for *Aipichthys*. *Minimum age*: 98.0  
258 Ma. *Prior setting*: lognormal prior, minimum age 98.0 Ma, mean=1.0, S.D.=1.25, upper 95% CI:  
259 119.0 Ma<sup>48</sup>.

260

261 **ii. Node: Stem lineage Polymixiiformes**, dating the MRCA of *Polymixia lowei* and  
262 *Aphredoderus sayanus*, which subtends the MRCA of *Polymixia* and Percopsiformes. *First*  
263 *occurrence*: †*Homonotichthys dorsalis*. Lower Chalk of Sussex and Kent, UK<sup>73</sup>. *Resolution in*  
264 *phylogenetic analyses*: none. *Character states*: four full-sized branchiostegals; anterior  
265 branchiostegals reduced and forming support for chin barbel<sup>16,73</sup>. *Stratigraphy*: middle-upper  
266 Cenomanian, zone of *Holoaster subglobosus*, corresponding to the late Cenomanian<sup>73-75</sup>. The  
267 minimal age for †*Homonotichthys dorsalis* is provided by the age of Cenomanian-Turonian  
268 boundary, which is dated as 93.9 Ma<sup>72</sup>. *Absolute age estimate*: 93.6 Ma (28). *Prior setting*:  
269 lognormal prior, minimum age 93.6 Ma, mean = 1.06, S.D.=1.25, upper 95% CI: 116.35 Ma<sup>4</sup>.

270

271 **iii. Node: Stem lineage Aphredoderidae**, dating the MRCA of *Aphredoderus sayanus* and  
272 *Typhlichthys subterraneus*, which subtends the MRCA of Aphredoderidae and Amblyopsidae.  
273 *First occurrence*: †*Trichophanes foliarum*. Florissant Formation, Colorado, USA<sup>76</sup>. *Resolution in*  
274 *phylogenetic analyses*: †*Trichophanes* and *Aphredoderus* form a clade in a maximum parsimony  
275 analysis of 47 morphological characters<sup>77</sup>. *Character states*: ventral margins of lachrymal and  
276 infraorbitals spiny; alveolar process of premaxilla divided into separate segments<sup>76-78</sup>.  
277 *Stratigraphy*: The upper Priabonian Florissant Roadcut is dated radiometrically using <sup>40</sup>Ar/<sup>39</sup>Ar

278 isotope ratios as 34.07 Ma<sup>79</sup>. *Absolute age estimate*: 34.1 Ma. *Prior setting*: lognormal prior,  
279 minimum age 34.1 Ma, mean=1.0, S.D.= 1.347, upper 95% CI: 59.0 Ma<sup>20</sup>.

280

281 **iv. Node: Stem lineage *Zenopsis***, dating the MRCA of *Zenopsis* and *Zeus*. *First occurrence*:  
282 †*Zenopsis clarus*, †*Z. tyleri*, and †*Z. hoernesii*. Lower Maikopian series, Psheka Horizon of the  
283 Belaya River, Caucasus<sup>80</sup>, and Lower Dysodylic shales, Strujinoasa-Drăgușina and Piatra Neamț,  
284 Romania<sup>81</sup>; Lower Dysodylic shales, Piatra Neamț, Romania<sup>81</sup>; Laško (Tüffer), Slovenia<sup>81</sup>.  
285 *Resolution in phylogenetic analyses*: maximum parsimony analysis of 45 morphological  
286 characters resulted in a phylogeny where †*Zenopsis clarus*, †*Z. tyleri*, and †*Z. hoernesii*, and *Z.*  
287 *oblongus* are resolved in a clade<sup>82</sup>. *Character states*: slender lachrymal; pelvic-fin spines absent;  
288 buckler-like plates present along ventral midline of abdomen, and along dorsal ridge from middle  
289 of spinous to end of soft dorsal fin<sup>82</sup>. *Stratigraphy*: lower Rupelian [P18], lower Khadumian  
290 regional stage<sup>83</sup>. *Absolute age estimate*: 32.0 Ma<sup>84</sup>. *Prior setting*: lognormal prior, minimum age  
291 32.0 Ma, mean=1.0, S.D.= 0.33, upper 95% CI: 36.7 Ma<sup>20</sup>.

292

293 **v. Node: Stem lineage *Lampridae***, dating the MRCA of *Lampris guttatus* and *Zu elongatus*,  
294 which is the MRCA of Lampriformes. *First occurrence*: †*Turkmene finitimus*. Danatinsk Suite,  
295 Uylyya-Kushlyuk locality, Turkmenistan<sup>85,86</sup>. *Resolution in phylogenetic analysis*: none.  
296 *Character states*: first dorsal fin pterygiophore strongly reclined posteriorly; enlarged pectoral  
297 fins inserting high on flank; shoulder girdle broad ventrally, with expanded coracoid; long  
298 parapophyses absent from abdominal vertebrate<sup>86</sup>. *Stratigraphy*: uppermost Thanetian-lowermost  
299 Ypresian<sup>87</sup>. *Absolute age estimate*: 55.8 Ma<sup>84</sup>. *Prior setting*: lognormal prior, minimum age 55.8  
300 Ma, mean=1.0, S.D.= 1.411, upper 95% CI: 83.5 Ma<sup>20</sup>.

301

302 **vi. Node: Stem lineage *Holocentridae***, dating the MRCA of *Myripristis violacea* and  
303 *Rondeletia loricata*, which subtends the MRCA of *Holocentridae* and *Berycoidei*. *First*  
304 *occurrence*: †*Stichocentrus liratus* from the Sannine Limestone, Hadjula, Lebanon<sup>88</sup>. *Resolution*  
305 *in phylogenetic analyses*: none. *Character states*: The penultimate anal-fin spine of  
306 †*Stichocentrus* is enlarged and represents a synapomorphy of holocentroids<sup>16,89</sup>. *Stratigraphy*:  
307 See discussion for Calibration i, †*Aipichthys minor*. *Absolute age estimate*: 98.0 Ma. *Prior*

308 *setting*: lognormal prior, minimum age 98.0 Ma, mean=1.0, S.D.= 0.8, upper 95% CI: 108.0  
309 Ma<sup>48</sup>.

310

311 **vii. Node: Stem lineage Myripristinae**, dating the MRCA of *Myripristis violacea* and  
312 *Sargocentron coruscum*, which subtends the MRCA of Holocentridae. *First occurrence*:  
313 †*Eoholocentrum macrocephalum*, †*Berybolcensis leptacanthus*, and †*Tenuicentrum pattersoni*.  
314 Pesciara beds of ‘Calcarei nummulitici’, Bolca, Italy<sup>90-92</sup>. *Resolution in phylogenetic analyses*:  
315 analysis of 72 morphological characters resolve †*Eoholocentrum*, †*Berybolcensis*, and  
316 †*Tenuicentrum* as stem-lineage Myripristinae<sup>93</sup>. *Character states*: tooth-bearing platform  
317 expanded and overhangs lateral side of dentary near symphysis; premaxillary tooth field curves  
318 dorsally toward ascending process at symphysis; edentulous ectopterygoid (†*Berybolcensis* and  
319 †*Tenuicentrum*); spinous procurrent caudal-fin rays reduced to four in the upper and three in the  
320 lower lobe (†*Berybolcensis* and †*Tenuicentrum*)<sup>93</sup>. *Stratigraphy*: upper Ypresian [NP14]<sup>94,95</sup>.  
321 *Absolute age estimate*: 50 Ma<sup>84</sup>. *Prior setting*: lognormal prior, minimum age 50.0 Ma,  
322 mean=1.0, S.D.= 0.6, upper 95% CI: 57.3 Ma<sup>20</sup>.

323

324 **viii. Node: Crown lineage Syngnathiformes**, dating the MRCA of *Pegasus volitans* and  
325 *Syngnathus scovelli*, which subtends the MRCA of Syngnathiformes. *First occurrence*:  
326 †*Gasterorhamphosus zuppichinii*. ‘Calcarei di Melissano’, Porto Selvaggio, Lecce province,  
327 Italy<sup>96</sup>. *Resolution in phylogenetic analyses*: none, but Orr<sup>97</sup> argues that †*Gasterorhamphosus* is a  
328 stem lineage of a clade containing Macrorhamphosidae and Centriscidae. *Character states*: anal-  
329 fin spine absent; enlarged dorsal-fin spine with serrated posterior margin; elongated tubular  
330 snout; pleural ribs absent; cleithrum bears enlarged posterodorsal process; rod-like anteroventral  
331 process of coracoid; pectoral rays simple<sup>97,98</sup>. *Stratigraphy*: uppermost Campanian-lowermost  
332 Maastrichtia<sup>99</sup>. *Absolute age estimate*: 69.71 Ma<sup>48</sup>. *Prior setting*: lognormal prior, minimum age  
333 69.71 Ma, mean=1.0, S.D.= 0.785, upper 95% CI: 79.6 Ma<sup>48</sup>.

334

335 **ix. Node: Stem lineage Centriscidae**, dating the MRCA of *Aeoliscus strigatus* and  
336 *Macroramphosus gracilis*, which subtends the MRCA of Centriscidae. *First occurrence*:  
337 †*Paramphisile weileri* and †*Paraeoliscus robinetae*. Pesciara beds of ‘Calcarei nummulitici’,  
338 Bolca, Italy<sup>100</sup>. *Resolution in phylogenetic analyses*: none. *Character states*: caudal fin directed

339 posteroventrally (†*Paraeoliscus*); dorsal spine jointed distally<sup>97</sup>. *Stratigraphy*: See discussion for  
340 Calibration viii †*Eoholocentrum macrocephalum*. *Absolute age estimate*: 50 Ma<sup>84</sup>. *Prior setting*:  
341 lognormal prior, minimum age 50.0 Ma, mean=1.0, S.D.= 0.6, upper 95% CI: 57.3 Ma<sup>20</sup>.

342

343 **x. Node: Crown lineage Ariomma**, dating the MRCA of *Ariomma indica* and *A. melana*. *First*  
344 *occurrence*: †*Ariomma geslini* from the diatomites of St Eugène, Chelif Basin, Algeria<sup>29</sup>.  
345 *Resolution in phylogenetic analyses*: none. *Character states*: extension of pleural ribs onto  
346 caudal vertebrae<sup>101,102</sup>, and a distinctive pattern of anal-fin skeleton shared with *A. bondi* and *A.*  
347 *melana*, consisting of anterior pterygiophores that bend posteriorly, overlapping the similarly  
348 curved shafts of successive pterygiophores<sup>102,103</sup>. *Stratigraphy*: Details presented in Friedman et  
349 al.<sup>29</sup>. *Absolute age estimate*: 5.94 Ma. *Prior setting*: lognormal prior, minimum age 5.94 Ma,  
350 mean=1.0, S.D.= 1.299, upper 95% CI: 28.96 Ma<sup>29</sup>.

351

352 **xi. Node: stem lineage Stromateidae**, dating the MRCA of *Pampus argenteus* and *Ariomma*  
353 *indica*, which subtends the MRCA Stromateidae and the clade that comprises *Ariomma* and  
354 Nomeidae. *First occurrence*: †*Pinichthys pulcher* from the Pshekha Horizon †*Planorbella* Beds,  
355 Lower Maikop Caucasus<sup>104</sup>. *Resolution in phylogenetic analyses*: none. *Character states*:  
356 †*Pinichthys* has a stellate, bony base of papillae in the region expected to bear pharyngeal  
357 sacs<sup>105</sup>. Synapomorphies of stromateiod displayed by †*Pinichthys* include: a continuous dorsal  
358 fin; a ventral articulation between the coracoid and ventral tip of the cleithrum; and an elongated  
359 first anal fin pterygiophore that is strongly reclined<sup>106</sup>. †*Pinichthys* differs from extant lineages of  
360 Stromateidae by having well-developed pelvic fins in adults and lacking extension of the first  
361 anal fin pterygiophore posterior to the first haemal spine<sup>29</sup>. †*Pinichthys* is interpreted as a stem-  
362 lineages stromateiod, which is consistent with previous interpretations<sup>104</sup>. *Stratigraphy*: Details  
363 presented in Friedman et al.<sup>29</sup>. *Absolute age estimate*: 32.02 Ma. *Prior setting*: lognormal prior,  
364 minimum age 32.02 Ma, mean=1.0, S.D.= 1.2, upper 95% CI: 51.6 Ma<sup>29</sup>.

365

366 **xii. Node: stem lineage Chiasmodontidae**, dating the MRCA of *Kali kerberti* and *Tetragonurus*  
367 *atlanticus*, which subtends the MRCA of Chiasmodontidae and *Tetragonurus*. *First occurrence*:  
368 †*Bannikovichthys paelignus* from the fish-bearing laminates of Toricella Paligna, Italy<sup>107</sup>.  
369 *Resolution in phylogenetic analyses*: none. *Character states*: The hypothesis that

370 †*Bannikovichthys* is related to living Chiasmodontidae is based on an absence of scales,  
371 elongated opercles, delicate ossification of the interopercle and subopercle, and enlarged  
372 hourglass-shaped radials<sup>107</sup>. The relationships of †*Bannikovichthys* among living chiasmodontids  
373 is uncertain, so it is conservatively treated as a stem-lineage taxon<sup>29</sup>. *Stratigraphy*: Details  
374 presented in Friedman et al.<sup>29</sup>. *Absolute age estimate*: 11.9 Ma. *Prior setting*: lognormal prior,  
375 minimum age 11.9 Ma, mean=1.0, S.D.= 1.454, upper 95% CI: 41.56 Ma<sup>29</sup>.

376

377 **xiii. Node: within crown of *Scomber***, dating the MRCA of *Scomber australasicus* and *Scomber*  
378 *japonicus*. *First occurrence*: *Scomber colias* from the Raz-el-Aïn, Oran, Algeria. *Resolution in*  
379 *phylogenetic analyses*: This fossil is attributed to the living species *Scomber colias*, which is  
380 resolved as the sister lineage of *S. japonicus* in a molecular phylogenetic analysis<sup>108</sup>.

381 *Stratigraphy*: Details presented in Friedman et al.<sup>29</sup>. *Absolute age estimate*: 5.94 Ma. *Prior*  
382 *setting*: lognormal prior, minimum age 5.94 Ma, mean=1.0, S.D.= 1.255, upper 95% CI: 27.4  
383 Ma<sup>29</sup>.

384

385 **xiv. Node: stem lineage *Scomber***, dating the MRCA of *Scomber australasicus* and *Rastrelliger*  
386 *kanagurta*. *First occurrence*: †*Scomber saadii* from the Padbeh Formation of Istehbanât, Iran<sup>109</sup>.  
387 *Resolution in phylogenetic analyses*: None. *Character states*: †*Scomber saadii* exhibits serrations  
388 on the teeth that is a synapomorphy of *Scomber*<sup>108,110</sup>. *Stratigraphy*: Details presented in  
389 Friedman et al.<sup>29</sup>. *Absolute age estimate*: 33.9 Ma. *Prior setting*: lognormal prior, minimum age  
390 33.9 Ma, mean=1.0, S.D.= 1.02, upper 95% CI: 48.45 Ma<sup>29</sup>.

391

392 **xv. Node: stem lineage *Acanthocybium***, dating the MRCA of *Acanthocybium solandri* and  
393 *Scomberomorus maculatus*. *First occurrence*: †*Palaeocybium proosti* from the London Clay  
394 Formation, Isle of Sheppey, UK<sup>111</sup>. *Resolution in phylogenetic analysis*: none. *Character states*:  
395 †*Palaeocybium* and *Acanthocybium* share closely spaced teeth with blunt tips and the holotype  
396 specimen shows an elongate lower jaw that is similar to *Acanthocybium* and *Scomberomorus*<sup>112-</sup>  
397 <sup>114</sup>. *Stratigraphy*: Details presented in Friedman et al.<sup>29</sup>. *Absolute age estimate*: 50.5 Ma. *Prior*  
398 *setting*: lognormal prior, minimum age 50.5 Ma, mean=1.0, S.D.= 0.5, upper 95% CI: 56.72  
399 Ma<sup>29</sup>.

400

401 **xvi. Node: stem lineage Sardini + Thunnini**, dating the MRCA of *Scomberomorus maculatus*  
402 and *Euthynnus affinis*. *First occurrence*: †*Eocoelopoma portentosum* from the Danatinsk  
403 Formation, Turkmenistan<sup>115</sup>. *Resolution in phylogenetic analyses*: None. *Character states*:  
404 Details presented in Friedman et al.<sup>29</sup>. *Stratigraphy*: Details presented in Friedman et al.<sup>29</sup>.  
405 Absolute age estimate: 54.17 Ma. *Prior setting*: lognormal prior, minimum age 54.17 Ma,  
406 mean=1.0, S.D.= 0.698, upper 95% CI: 62.71 Ma<sup>29</sup>.

407  
408 **xvii. Node: stem lineage Thunnus**, dating the MRCA of *Thunnus orientalis* and *Auxis rochei*,  
409 which is the MRCA of Thunnini. *First occurrence*: †*Thunnus abchasicus* from the Kuma  
410 Horizon, Pshékha River, Caucasus<sup>116</sup>. *Resolution in phylogenetic analyses*: None. *Character*  
411 *states*: †*Thunnus abchasicus* exhibits several synapomorphies of *Thunnus* that include the  
412 presence of small oral teeth and the shortened preural vertebrae<sup>116</sup>. The presence of a spine in the  
413 second dorsal fin suggests that †*T. abchasicus* is a stem lineage *Thunnus*<sup>115</sup>. *Stratigraphy*: Details  
414 presented in Friedman et al.<sup>29</sup>. *Absolute age estimate*: 38.62 Ma. *Prior setting*: lognormal prior,  
415 minimum age 38.62 Ma, mean=1.0, S.D.= 0.91, upper 95% CI: 50.78 Ma<sup>29</sup>.

416  
417 **xviii. Node: stem lineage Promethichthys**, dating the MRCA of *Promethichthys prometheus* and  
418 *Diplospinus multistriatus*. *First occurrence*: †*Hemithyrsites maicopicus* from the Upper Maikop  
419 of the Kurdzhips River, Adygea, Caucasus<sup>115</sup>. *Resolution in phylogenetic analyses*: None.  
420 *Character states*: Derived traits shared by *Promethichthys* and †*Hemithyrsites maicopicus*  
421 include reduction of the pelvic fin to a single spine and the presence of two pairs of dorsal and  
422 anal finlets<sup>115</sup>. *Stratigraphy*: Details presented in Friedman et al.<sup>29</sup>. *Absolute age estimate*: 15.97  
423 Ma. *Prior setting*: lognormal prior, minimum age 15.97 Ma, mean=1.0, S.D.= 0.986, upper 95%  
424 CI: 29.67 Ma<sup>29</sup>.

425  
426 **xix. Node: Stem lineage Channidae**, dating the MRCA of *Channa micropeltes* and *Helostoma*  
427 *temminckii*, which subtends the MRCA of Channidae and a clade containing Helostoma,  
428 Anabantidae, and Osphronemidae. *First occurrence*: †*Anchichanna kuldanensis* from the Ganda  
429 Kas Area, Kuldana Formation, Kala Chitta Hills, Pakistan<sup>117</sup>. *Resolution in phylogenetic*  
430 *analyses*: None. *Character states*: †*Anchichanna kuldanensis* exhibits the Channidae  
431 synapomorphy of the outer wall of the auditory bulla formed mainly by the prootic, but is likely



432 a stem-lineage taxon because it does not share synapomorphies with either *Channa* or  
433 *Parachanna*<sup>117</sup>. *Stratigraphy*: The Kuldana Formation and other vertebrate fossil localities of the  
434 Kala Chitta Hills straddle the Ypresian-Lutetian boundary<sup>118</sup>. *Absolute age estimate*: 41.3 Ma.  
435 *Prior setting*: lognormal prior, minimum age 41.3 Ma, mean=1.0, S.D.= 1.31, upper 95% CI:  
436 64.7 Ma<sup>119</sup>.

437  
438 **xx. Node: Stem lineage Sphyraenidae**, dating the MRCA of *Sphyraena jello* and *Lactarius*  
439 *lactarius*. *First occurrence*: †*Sphyraena bolcensis*, Pesciara beds of ‘Calcari nummulitici’,  
440 Bolca, Italy<sup>120,121</sup>. *Resolution in phylogenetic analyses*: None. *Character states*: three ‘T’-shaped,  
441 sutured predorsals or spineless pterygiophores<sup>122</sup>; elongate gape; upper jaw non-protrusible;  
442 enlarged fangs on dentary, premaxilla, and palatine. *Stratigraphy*: upper Ypresian [NP14]<sup>94,95</sup>.  
443 *Absolute age estimate*: 50.0 Ma<sup>95</sup>. *Prior setting*: lognormal prior, minimum age 50.0 Ma,  
444 mean=1.0, S.D.= 0.5999, upper 95% CI: 57.3 Ma<sup>1</sup>.

445  
446 **xxi. Node: Stem lineage Mene**, dating the MRCA of *Mene maculata* and *Xiphias gladius*. *First*  
447 *occurrence*: †*Mene purdyi*, ‘Mancora Formation’, Perú<sup>123</sup>; †*M. triangulum*, Danatinsk Suite,  
448 Uyly-Kushlyuk locality, Turkmenistan<sup>85,87</sup>; and †*Mene* sp., ‘Stolle Klint clay’, Ølst Formation,  
449 Denmark<sup>124</sup>. *Resolution in phylogenetic analyses*: None. *Character states*: frontal vault; many  
450 small infraorbitals; all anal fin rays short, with anteriormost rays plate like; anal fin spines  
451 absent; postcleithrum broad and contacts first anal fin pterygiophore; disc-like body with deep  
452 ventral keel; greatly elongated second anal fin ray<sup>123</sup>. *Stratigraphy*: uppermost Thanetian-  
453 lowermost Ypresian [NP14]<sup>87,124</sup>. *Absolute age estimate*: 55.2 Ma<sup>125</sup>. *Prior setting*: lognormal  
454 prior, minimum age 55.2 Ma, mean=1.0, S.D.= 0.92, upper 95% CI: 67.5 Ma<sup>1,48</sup>.

455  
456 **xxii. Node: Stem lineage Carangidae**, dating the MRCA of *Caranx caninus* and *Trachinotus*  
457 *goodei*, which subtends the MRCA of the clade comprising Carangidae, *Coryphaena*,  
458 *Rachycentron*, Scomberoidinae, and Trachinotinae. *First occurrence*: †*Archaeus oblongus*.  
459 Danatinsk Suite, Uyly-Kushlyuk locality, Turkmenistan<sup>85</sup>. *Resolution in phylogenetic analyses*:  
460 None. *Character states*: broad gap between second and third anal-fin spines<sup>126</sup>. *Stratigraphy*:  
461 uppermost Thanetian-lowermost Ypresian<sup>87</sup>. *Absolute age estimate*: 55.8 Ma<sup>84</sup>. *Prior setting*:  
462 lognormal prior, minimum age 55.8 Ma, mean=1.0, S.D.= 0.661, upper 95% CI: 63.9 Ma<sup>1</sup>.

463 **xxiii. Node: Stem lineage Caranginae**, dating the MRCA of *Caranx caninus* and *Seriola*  
464 *dumerili*, which subtends the MRCA of Carangidae. *First occurrence*: †*Eastmanalepes*  
465 *primaevus*, Pesciara beds of ‘Calcari nummulitici’, Bolca, Italy<sup>127</sup>. *Resolution in phylogenetic*  
466 *analyses*: None. *Character states*: lateral line scales modified as thick scutes<sup>126,128</sup>. *Stratigraphy*:  
467 upper Ypresian [NP14]<sup>94</sup>. *Absolute age estimate*: 49.0 Ma<sup>48</sup>. *Prior setting*: lognormal prior,  
468 minimum age 49.0 Ma, mean=1.0, S.D.= 0.1, upper 95% CI: 52.2 Ma<sup>1,48</sup>.  
469  
470 **xxiv. Node: Stem lineage Echeneioidei**, dating the MRCA of *Echeneis naucrates* and  
471 *Scomberoides lysan*, which subtends the MRCA of the clade comprising Echeneidae,  
472 *Coryphaena*, *Rachycentron*, Scomberoidinae, and Trachinotinae. *First occurrence*: †*Ductor*  
473 *vestenae* from the Pesciara locality of Bolca, Italy<sup>120,121</sup>. *Resolution in phylogenetic analyses*:  
474 parsimony and Bayesian analyses of morphology and combined molecular and morphological  
475 datasets resolve †*Ductor vestenae* as either a stem echeneioid or as the sister the clade containing  
476 *Rachycentron* and *Coryphaena*<sup>129</sup>. We follow the conservative consideration of †*Ductor vestenae*  
477 as a stem-lineage taxon, as used in Harrington et al.<sup>48</sup>. *Character states*: Discussed in Friedman  
478 et al.<sup>129</sup>. *Stratigraphy*: upper Ypresian [between NP14 and SPZ11]<sup>94</sup>. *Absolute age estimate*: 49.0  
479 Ma<sup>48</sup>. *Prior setting*: lognormal prior, minimum age 49.0 Ma, mean=1.0, S.D.= 0.1, upper 95%  
480 CI: 52.2 Ma<sup>48</sup>.  
481  
482 **xxv. Node: Stem lineage Echeneidae**, dating the MRCA of *Echeneis naucrates* and *Coryphaena*  
483 *hippurus*, which subtends the MRCA of clade containing Echeneidae, *Coryphaena*, and  
484 *Rachycentron*. *First occurrence*: unnamed Echeneidae undet. from the Frauenweiler clay pit,  
485 Germany<sup>130</sup>. *Resolution in phylogenetic analyses*: None. *Character states*: no supraneurals;  
486 multiple anal fin pterygiophores insert anterior to first haemal spine; spinous dorsal fin modified  
487 as adhesion disc<sup>129,131</sup>. *Stratigraphy*: See discussion in Harrington et al.<sup>48</sup>. *Absolute age estimate*:  
488 29.62 Ma<sup>48</sup>. *Prior setting*: lognormal prior, minimum age 29.62 Ma, mean=1.0, S.D.= 0.87,  
489 upper 95% CI: 41.0 Ma<sup>48</sup>.  
490  
491 **xxvi. Node: Stem lineage Scomberoides**, dating the MRCA of *Scomberoides lysan* and  
492 *Trachinotus goodei*, which subtends the MRCA of Scomberoidinae and Trachinotinae. *First*  
493 *occurrence*: *Scomberoides spinosus* from the Upper Maikop at Chernaya Rechka, Caucasus<sup>87</sup>.

494 *Resolution in phylogenetic analyses*: None. *Character states*: *Scomberoides spinosus* exhibits  
495 two synapomorphies of Scomberoidinae: 26 versus 24 vertebrae and posterior rays of the dorsal  
496 and anal fin developed as finlets<sup>126,128,132</sup>. *Stratigraphy*: See discussion in Harrington et al.<sup>48</sup>.  
497 *Absolute age estimate*: 19.3 Ma<sup>48</sup>. *Prior setting*: lognormal prior, minimum age 19.3 Ma,  
498 mean=1.0, S.D.= 1.095, upper 95% CI: 35.8 Ma<sup>48</sup>.

499

500 **xxvii. Node: Stem lineage Citharidae**, dating the MRCA of *Gymnachirus melas* and  
501 *Scophthalmus rhombus*, which subtends the MRCA of Citharidae and all other pleuronectoids  
502 except *Psettodes*. *First occurrence*: †*Eobothus minimus* from the Pesciara beds of ‘Calcari  
503 nummulitici’, Bolca, Italy<sup>133,134</sup>. *Resolution in phylogenetic analyses*: †*Eobothus* is the sister  
504 lineage of *Citharus*<sup>133</sup>. *Character states*: complete orbital asymmetry; dorsal fin extends above  
505 orbit; hook-shaped urohyal; parahypural not in articulation with pural centrum 1; long neural  
506 spine on preural centrum 2<sup>133</sup>. *Stratigraphy*: See discussion in Harrington et al.<sup>48</sup>. *Absolute age*  
507 *estimate*: 49.0 Ma<sup>48</sup>. *Prior setting*: lognormal prior, minimum age 49.0 Ma, mean=1.0, S.D.=  
508 0.68, upper 95% CI: 57.3 Ma<sup>48</sup>.

509

510 **xxviii. Node: Stem lineage of the clade containing Soleidae and Cynoglossidae**, dating the  
511 MRCA of *Aseraggodes xenicus* and *Poecilopsetta plinthus*. *First occurrence*: †*Eobuglossus*  
512 *eocenicus* from the Mokkatam Formation, Djebel Turah, Egypt<sup>135</sup>. *Resolution in phylogenetic*  
513 *analyses*: none. *Character states*: †*Eobuglossus* shows derived cranial features limited to  
514 Soleidae, including blind side preopercular canal terminating on ventral margin of preopercular  
515 and convex portion of blind side dentary anterior to angulo-articular<sup>135,136</sup>. *Stratigraphy*: See  
516 discussion in Harrington et al.<sup>48</sup>. *Absolute age estimate*: 41.2 Ma<sup>48</sup>. *Prior setting*: lognormal  
517 prior, minimum age 41.9 Ma, mean=1.0, S.D.= 0.4, upper 95% CI: 46.4 Ma<sup>48</sup>.

518

519 **xxix. Node: Stem lineage Bothidae**, dating the MRCA of *Bothus pantherinus* and *Cyclopsetta*  
520 *frimbriata*, which subtends the MRCA of the clade containing Bothidae and Cyclosettidae.  
521 *First occurrence*: †*Oligobothus pristinus* from the Lower Dysodilic shales, Piatra Neamț,  
522 Romania<sup>137</sup>. *Resolution in phylogenetic analyses*: None. *Character states*: myorhabdoi  
523 present<sup>137</sup>. *Stratigraphy*: See discussion in Harrington et al.<sup>48</sup>. *Absolute age estimate*: 29.62 Ma<sup>48</sup>.

524 *Prior setting*: lognormal prior, minimum age 29.62 Ma, mean=1.0, S.D.= 0.06, upper 95% CI:  
525 32.6 Ma<sup>48</sup>.

526

527 **xxx. Node: Stem lineage Pleuronectidae**, dating the MRCA of *Pleuronichthys cornutus* and  
528 *Paralichthys albigutta*, which subtends the MRCA of the clade containing Pleuronectidae and  
529 Paralichthyidae. *First occurrence*: †*Oligopleuronectes germanicus* from the Frauenweiler fossil  
530 site, Germany<sup>138</sup>. *Resolution in phylogenetic analyses*: None. *Character states*: Suggested as a  
531 member of Pleuronectidae based on †*Oligopleuronectes* being right-eyed and having a lateral  
532 process on the eye-side frontal<sup>138,139</sup>. *Stratigraphy*: See discussion in Harrington et al.<sup>48</sup>. *Absolute*  
533 *age estimate*: 29.62 Ma<sup>48</sup>. *Prior setting*: lognormal prior, minimum age 29.62 Ma, mean=1.0,  
534 S.D.= 0.45, upper 95% CI: 35.3 Ma<sup>48</sup>.

535

536 **xxxi. Node: Stem lineage Bothus**, dating the MRCA of *Bothus pantherinus* and *Crossorhombus*  
537 *azureus*. *First occurrence*: *Bothus* sp. from the Middle Tsurevsky Member of the Tsurevsky  
538 Formation along the bank of the Psheka River, Caucasus<sup>140</sup>. *Resolution in phylogenetic analyses*:  
539 None. *Character states*: A specific affinity to *Bothus* is supported by the presence of robust  
540 rectangular haemal spines<sup>140,141</sup>. *Stratigraphy*: See discussion in Harrington et al.<sup>48</sup>. *Absolute age*  
541 *estimate*: 11.056 Ma<sup>48</sup>. *Prior setting*: lognormal prior, minimum age 29.62 Ma, mean=1.0, S.D.=  
542 0.84, upper 95% CI: 39.9 Ma<sup>48</sup>.

543

544 **xxxii. Node: Stem lineage Pseudocrenilabrinae**, dating the MRCA of *Bathybates minor* and  
545 *Amphilophus citrinellus*, which subtends the MRCA of the clade that contains  
546 Pseudocrenilabrinae and Cichlinae. *First occurrence*: †*Mahengechromis plethos* from Mahenge,  
547 Tanzania<sup>142</sup>. *Resolution in phylogenetic analyses*: Several phylogenetic resolutions of  
548 †*Mahengechromis* place the taxon as either a crown lineage Cichlidae or crown lineage  
549 Pseudocrenilabrinae<sup>142,143</sup>. We follow Rabosky et al.<sup>119</sup> in conservatively treating  
550 †*Mahengechromis* as a stem-lineage Pseudocrenilabrinae. *Character states*: The identification  
551 of †*Mahengechromis* as a cichlid is supported by the morphology of the lower pharyngeal jaw,  
552 squamation, and meristics of vertebrae and median fins<sup>142-144</sup>. *Stratigraphy*: The Mahenge fossil  
553 deposits accumulated in a crater formed by intrusion of kimberlite and U-Pb of a zircon crystal  
554 dates the formation of the kimberlite at 45.83 +/-0.17 Ma<sup>145</sup>. Because the lacustrine sediments

555 predate the kimberlite emplacement it was suggested the age of the fossil deposits are 0.2 to 0.1  
556 Ma younger<sup>145,146</sup>. We use the conservative date of 45 Ma used in Rabosky et al.<sup>119</sup>. Absolute age  
557 estimate: 45.0 Ma. *Prior setting*: lognormal prior, minimum age 45.0 Ma, mean=1.0, S.D.= 1.29,  
558 upper 95% CI: 67.3 Ma.

559

560 **xxxiii. Node: Crown lineage Exocetoidei**, dating the MRCA of *Xenentodon cancila* and  
561 *Hemiramphus far*, which subtends the MRCA of Belonidae and Hemiramphidae. *First*  
562 *occurrence*: †*Rhamphecoetus volans* from Pesciara beds of ‘Calcari nummulitici’, Bolca,  
563 Italy<sup>147</sup>. *Resolution in phylogenetic analyses*: None. *Character states*: lower jaw symphysis  
564 extended; ventral lobe of caudal fin enlarged relative to dorsal lobe; pectoral fins greatly  
565 expanded<sup>148-150</sup>. *Stratigraphy*: upper Ypresian [NP14]<sup>94,95</sup>. *Absolute age estimate*: 49.0 Ma<sup>4</sup>.  
566 *Prior setting*: lognormal prior, minimum age 49.0 Ma, mean=1.0, S.D.= 1.49, upper 95% CI:  
567 80.52 Ma<sup>4</sup>.

568

569 **xxxiv. Node: Stem lineage Calotomus (Labridae)**, dating the MRCA of *Calotomus spinidens*  
570 and *Sparisoma radians*. *First occurrence*: †*Calotomus preisli* from the Leitha Limestone, St.  
571 Margarethen, Austria<sup>151</sup>. *Resolution in phylogenetic analyses*: None. *Character states*: Presence  
572 of upper pharyngeal bones bearing 1 to 3 rows of teeth and presence of a lateral canine on the  
573 premaxilla are synapomorphies for Scarinae. A conical tooth on the medial face of the  
574 premaxilla is a synapomorphy of *Calotomus*<sup>151</sup>. *Stratigraphy*: The Leitha Limestone is  
575 constrained by calcareous nannofossils to the standard biozone NN6<sup>151</sup>, which is entirely in the  
576 Serravallian stage of the Miocene. The top of NN6 is dated at 11.9 Ma<sup>4</sup>. *Absolute age estimate*:  
577 11.9 Ma<sup>4</sup>. *Prior setting*: lognormal prior, minimum age 11.9 Ma, mean=1.0, S.D.= 1.501, upper  
578 95% CI: 43.95 Ma<sup>4</sup>.

579

580 **xxxv. Node: Stem lineage Luvaridae**, dating the MRCA of *Luvarus imperialis* and *Acanthurus*  
581 *bahianus*, which subtends the MRCA of *Luvarus* and the clade containing *Zanclus cornutus* and  
582 Acanthuridae. *First occurrence*: †*Avitoluvarus diana*, †*A. mariannae*, †*Kushlukia permira*, and  
583 †*Luvarus necopinatus*. Danatinsk Suite, Uylya-Kushlyuk locality, Turkmenistan<sup>152</sup>. *Resolution in*  
584 *phylogenetic analyses*: a parsimony analysis of morphological characters resolves a clade that  
585 contains †*Avitoluvarus*, †*Kushlukia*, †*Luvarus necopinatus*, and *L. imperialis*, which is sister to a

586 clade comprising *Zanclus* and Acanthuridae<sup>152</sup>. *Character states*: median pterygial truss  
587 surrounding most of body; two or fewer dorsal-fin spines; no anal-fin spines; distal end of first  
588 anal-fin pterygiophore greatly elongated anteriorly; hypurals 1-4 fused; caudal fins broadly  
589 overlap hypural(s); pelvic fin rudimentary in adults; teeth absent or greatly reduced<sup>152</sup>.

590 *Stratigraphy*: uppermost Thanetian-lowermost Ypresian<sup>87</sup>. *Absolute age estimate*: 55.8 Ma<sup>84</sup>.  
591 *Prior setting*: lognormal prior, minimum age 55.8 Ma, mean=1.0, S.D.= 0.661, upper 95% CI:  
592 63.9 Ma<sup>20</sup>.

593  
594 **xxxvi. Node: Stem lineage Acanthurinae**, dating the MRCA of *Acanthurus bahianus* and *Naso*  
595 *unicornis*, which subtends the MRCA of Acanthuridae. *First occurrence*: †*Proacanthurus tenius*  
596 from the ‘Pesciara beds of ‘Calcari nummulitici’, Bolca, Italy<sup>153</sup>. *Resolution in phylogenetic*  
597 *analyses*: None. *Character states*: caudal peduncle bears folding spine<sup>153</sup>. *Stratigraphy*: upper  
598 Ypresian [NP14]<sup>94</sup>. *Absolute age estimate*: 50 Ma<sup>94</sup>. *Prior setting*: lognormal prior, minimum age  
599 50.0 Ma, mean=1.0, S.D.= 0.6, upper 95% CI: 57.3 Ma<sup>1</sup>.

600  
601 **xxxvii. Node: Stem lineage Siganidae**, dating the MRCA of *Siganus spinus* and *Scatophagus*  
602 *argus*. *First occurrence*: †*Siganopygaeus rarus*. Danatinsk Suite, Uylya-Kushlyuk locality,  
603 Turkmenistan<sup>154</sup>. *Resolution in phylogenetic analyses*: parsimony analysis of morphological  
604 characters resolves four Eocene and Oligocene taxa, including †*Siganopygaeus*, as stem-lineage  
605 Siganidae<sup>154</sup>. *Character states*: two pelvic-fin spines; seven or more anal-fin spines; ten or fewer  
606 anal-fin rays<sup>154</sup>. *Stratigraphy*: uppermost Thanetian-lowermost Ypresian<sup>87</sup>. *Absolute age*  
607 *estimate*: 55.8 Ma<sup>84</sup>. *Prior setting*: lognormal prior, minimum age 55.8 Ma, mean=1.0, S.D.=  
608 0.661, upper 95% CI: 63.9 Ma<sup>20</sup>.

609  
610 **xxxviii. Node: Stem lineage of Chaetodontidae**, dating the MRCA of *Chaetodon kleinii* and  
611 *Leiognathus equula*, which subtends the MRCA of the clade that contains Chaetodontidae and  
612 Leiognathidae. *First occurrence*: Chaetodontidae cf. *Chaetodon* (tholichthys-stage larvae) from  
613 the ‘Fish shales’, Frauenweiler clay pit, Germany<sup>130,155</sup>. *Resolution in phylogenetic analyses*:  
614 None. *Character states*: overlapping, sequential articulation between first dorsal fin  
615 pterygiophores, supraneurals, and supraoccipital crest; second infraorbital excluded from orbital  
616 margin; two sets of lateral processes on each side of first dorsal fin pterygiophore define a clear

617 groove; distal head of second supraneural longer than that of first supraneural<sup>155-157</sup>.

618 *Stratigraphy*: The ‘Fish shales’ lie within NP23<sup>138</sup>. *Absolute age estimate*: 29.62 Ma<sup>4</sup>. *Prior*

619 *setting*: lognormal prior, minimum age 29.62 Ma, mean=1.0, S.D.= 1.498, upper 95% CI: 61.6

620 Ma<sup>4</sup>.

621

622 **xxxix. Node: Stem lineage *Chaetodon***, dating the MRCA of *Chaetodon kleinii* and

623 *Prognathodes marcellae*. *First occurrence*: †*Chaetodon fischeuri* from the Saint-Denis du Sig,

624 Raz-el-Aïn, Les Planteurs, and Eugène, Algeria<sup>156</sup>. *Resolution in phylogenetic analyses*: None.

625 *Character states*: overlapping, sequential articulation between first dorsal fin pterygiophores,

626 supraneurals, and supraoccipital crest; second infraorbital excluded from orbital margin; two sets

627 of lateral processes on each side of first dorsal fin pterygiophore define a clear groove; distal

628 head of second supraneural longer than that of first supraneural<sup>156,157</sup>. *Stratigraphy*: Messinian<sup>158-</sup>

629 <sup>160</sup>. *Absolute age estimate*: 7.1 Ma. *Prior setting*: lognormal prior, minimum age 7.1 Ma,

630 mean=0.26, S.D.= 0.2, upper 95% CI: 8.9 Ma<sup>20</sup>.

631

632 **xl. Node: Stem lineage *Gazza***, dating the MRCA of *Gazza minuta* and *Leiognathus equula*.

633 *First occurrence*: †*Euleiognathus tottori* from the Iwami Formation, Tottori Group, Japan<sup>161,162</sup>.

634 *Resolution in phylogenetic analyses*: none. *Character states*: long ascending processes of

635 premaxillae; paddle-like expansions of neural and haemal spine of preural centrum 4; single

636 supraneural; serrated anterior margins of fin spines; caniniform teeth<sup>163</sup>. The final character is

637 unique to *Gazza* within leiognathids<sup>161,164</sup>. The nesting of *Gazza* within the phylogeny of

638 Leiognathidae indicates caniniform teeth are derived within the clade<sup>163,165,166</sup>. See Gill and

639 Michalski<sup>167</sup> who are sceptical that †*Euleiognathus* is a leiognathid. *Stratigraphy*: middle

640 Miocene<sup>161,162</sup>. *Absolute age estimate*: 11.6 Ma<sup>168</sup>. *Prior setting*: lognormal prior, minimum age

641 11.6 Ma, mean=0.8, S.D.= 1.0, upper 95% CI: 23.1 Ma<sup>20</sup>.

642

643 **xli. Node: Stem lineage *Diodontidae***, dating the MRCA of *Diodon liturosus* and *Canthigaster*

644 *rostrata*, which subtends the MRCA of Diodontidae and Tetraodontidae. *First occurrence*:

645 †*Prodiodon tenuispinus*, †*P. erinaceus*, †*Heptadiodon echinus*, and †*Zignodon fornasieroae*

646 from the Pesciara beds of ‘Calcarei nummulitici’, Bolca, Italy<sup>169</sup>. *Resolution in phylogenetic*

647 *analyses*: parsimony analysis of morphological characters resolves a clade containing

648 †*Prodiodon tenuispinus*, †*P. erinaceus*, †*Heptadiodon echinus*, †*Zignodon fornasieroae*, *Diodon*  
649 *holocanthus*, and *Chilomycterus schoepfi*<sup>169</sup>. *Character states*: premaxillae fused along midline;  
650 dentaries fused along midline; jaws massive<sup>169</sup>. *Stratigraphy*: upper Ypresian [NP14]<sup>94</sup>. *Absolute*  
651 *age estimate*: 50 Ma<sup>84</sup>. *Prior setting*: lognormal prior, minimum age 50.0 Ma, mean=1.0, S.D.=  
652 0.6, upper 95% CI: 57.3 Ma<sup>20</sup>.

653

654 **xlii. Node: Stem lineage of Balistidae**, dating the MRCA of *Balistes capriscus* and *Aluterus*  
655 *monoceros*, which subtends the MRCA of Balistidae and Monacanthidae. *First occurrence*:  
656 †*Gornylistes prodigiosus* from the Kuma Horizon, Krasnodar Region, Caucasus<sup>170</sup>. *Resolution in*  
657 *phylogenetic analyses*: None. *Character states*: ventral shaft of second spine-bearing dorsal  
658 pterygiophore absent; supraneural strut present between abdominal neural spine and final spine-  
659 bearing dorsal pterygiophore; four anal-fin pterygiophores anterior to the haemal spine of the  
660 third caudal vertebra<sup>169</sup>. *Stratigraphy*: Bartonian [NP17] Kumian regional stage<sup>83</sup>. *Absolute age*  
661 *estimate*: 37.2 Ma<sup>84</sup>. *Prior setting*: lognormal prior, minimum age 37.2 Ma, mean=1.0, S.D.=  
662 0.42, upper 95% CI: 42.6Ma<sup>20</sup>.

663

664 **xliii. Node: Stem lineage Antennarioidei**, dating the MRCA of *Antennarius striatus* and  
665 *Ogcocephalus radiatus*. *First occurrence*: †*Eophryne bartutii* from the Pesciara beds of ‘Calcari  
666 nummulitici’, Bolca, Italy<sup>171</sup>. *Resolution in phylogenetic analyses*: None. †*Eophryne* was  
667 hypothesized to share common ancestry with Antennariidae based on overall morphological  
668 similarity<sup>171</sup>. The phylogenetic placement used for this calibration is conservatively applied to  
669 the more inclusive Antennarioidei. *Character states*: triradiate ectopterygoid; spatulate  
670 postmaxillary process of premaxilla<sup>171-173</sup>. *Stratigraphy*: upper Ypresian [NP14]<sup>94</sup>. *Absolute age*  
671 *estimate*: 50 Ma<sup>84</sup>. *Prior setting*: lognormal prior, minimum age 50.0 Ma, mean=1.0, S.D.= 0.6,  
672 upper 95% CI: 57.3 Ma<sup>1</sup>.

673

674

675

676

677

678



### 679 3. Supplementary results and discussion

680

#### 681 *a. Phylogeny and classification of Acanthomorpha, and a new delimitation of taxonomic* 682 *orders in Percomorpha*

683 The maximum likelihood analyses of the 702-taxon and 1,084-taxon UCE datasets confidently  
684 resolve the phylogenetic relationships of all sampled acanthomorph families. The phylogeny  
685 inferred from the IQ-TREE analysis of the multiple-partition, concatenated 1084-taxon dataset is  
686 represented in Supplementary Figs. 1-25. The results of the five other phylogenetic analyses are  
687 available on Dryad. Bootstrap support values across the entire IQ-TREE phylogeny are high,  
688 with most nodes being supported by 100% bootstrap support and only 27 of 1,107 nodes (2.4%)  
689 having values  $\leq 95\%$ . Tree topologies inferred using the different methods described in *Section*  
690 *1d* are largely consistent according to comparisons conducted in TOPD-FMITS v.4.6<sup>39</sup> (see  
691 Supplementary Table 2). Robinson-Foulds metrics across all comparisons were low ( $\leq 0.033$ ), as  
692 were nodal distances ( $\leq 1.046$ ). Supplementary Table 2 lists the 19 species that differ in their  
693 phylogenetic relationships across the different analyses. Most of these species are found in areas  
694 of the tree that have been historically difficult to resolve, such as Anthiadidae, Carangidae and  
695 Apogonidae. Tree topologies inferred in IQ-TREE and RAxML using multiple-partition, 700-  
696 taxon alignments were identical.

697 The non-percomorph acanthomorphs are classified into eight taxonomic orders:  
698 Lampriformes, Percopsiformes, Polymixiiformes (a single genus, *Polymixia*) Zeiformes,  
699 Gadiformes, Stylephoriformes (a single species, *Stylephorus chordatus*), Trachichthyiformes,  
700 and Beryciformes (Fig. 1).

701 The new UCE-inferred phylogeny provides an opportunity to reevaluate the classification  
702 of Percomorpha to identify inclusive taxonomic groupings that reflect phylogenetic relationships.  
703 An initial effort at building classifications based on molecular phylogenies attempted to preserve  
704 the ordinal ranks of the clades such as the Pleuronectiformes, Tetraodontiformes,  
705 Atheriniformes, and Synbranchiformes<sup>174</sup>. This classification proposed a delimitation of 33  
706 taxonomic orders in Percomorpha that each contain an average of only 7.4 families and 492.9  
707 species, and resulted in 10% of all percomorph families unassigned to a taxonomic order<sup>174</sup>. In  
708 Figs. 1 and 2, Supplementary Figs. 1-25, and Supplementary Table 3 we offer an alternative  
709 delimitation of 13 clades that we treat as taxonomic orders to accommodate the classification of

710 all 290 percomorph families. In the proposed classification, each taxonomic order comprises an  
711 average 2,226.8 species and 18.2 families.

712 The names of the orders in the proposed percomorph classification are consistent with  
713 conventions in ichthyological systematics by establishing a link with one of the constituent  
714 taxonomic families and using the “-iformes” suffix<sup>175,176</sup>. For example, this delimitation of  
715 Blenniiformes includes the Blenniidae and 48 other families (e.g., cichlids, livebearers, and  
716 mullets) that were previously identified as a monophyletic group in molecular phylogenetic  
717 studies<sup>1,4,15,21,22,177</sup>. Previously named Ovalentaria<sup>22</sup>, this diverse clade of percomorphs had been  
718 divided among seven orders<sup>174</sup>, one of which, Mugiliformes, included a single family, Mugilidae  
719 (mulletts).

720

## 721 **b. Phylogeny of non-percomorph acanthomorphs**

### 722 *i. Monophyly and relationships of Paracanthopterygii*

723 Similar to other phylogenomic studies, this UCE inferred phylogeny resolves a monophyletic  
724 and strongly supported Paracanthopterygii that includes *Polymixia* (beardfishes),  
725 Percopsiformes, Zeiformes, *Stylephorus chordatus* (Tube-eye), and Gadiformes (Fig. 1,  
726 Supplementary Fig. 1)<sup>4,15,178</sup>. While relationships within Paracanthopterygii differ among  
727 phylogenomic studies, the resolution of a clade containing *Polymixia* and Percopsiformes is the  
728 best-supported topology in the concordance factor analysis, with the 95% credible interval of the  
729 two alternative resolutions of *Polymixia* not overlapping with the optimal tree topology  
730 (Extended Date Fig. 1a, Supplementary Fig. 1).

731

### 732 *ii. Phylogenetic relationships of Lampriformes*

733 The new UCE phylogeny of Acanthomorpha resolves Lampriformes as the sister lineage of  
734 Paracanthopterygii (Fig. 1), which agrees with a previous phylogenetic analysis of UCE loci<sup>4</sup>.  
735 Other studies offer conflicting phylogenetic positions for Lampriformes; a phylogenomic  
736 analysis of ~1,000 exons resolve lampriforms as the sister lineage of the Acanthopterygii<sup>15</sup>,  
737 while morphological phylogenies place the lampriforms as the sister lineage of all other  
738 Acanthomorpha<sup>18</sup>. The Bayesian concordance factor analyses result in overlapping 95% credible  
739 intervals for the phylogeny that places lampriforms as sister to Paracanthopterygii and the  
740 phylogeny that resolves lampriforms as the sister lineage of all other acanthomorphs (Extended

741 Data Fig. 1b). The phylogeny that resolves lampriforms and Acanthopterygii as sister lineages  
742 scored the lowest concordance factors and the 95% credible interval of its concordance factors  
743 do not overlap with the credible interval of the phylogeny that resolves Lampriformes as the  
744 sister lineage of Paracanthopterygii (Extended Data Fig. 1b).

745

### 746 **iii. Phylogenetic relationships of Gadiformes**

747 The new UCE phylogeny of Gadiformes is similar to a recent study that utilized DNA sequences  
748 from more than 14,000 portions of protein coding genes<sup>179</sup>. Results from the two analyses are  
749 congruent in resolving *Bregmaceros* (codlets) as the sister lineage of all other Gadiformes, but  
750 differ in three specific relationships. The UCE phylogeny resolves Muraenolepididae (eel cods)  
751 and Trachyrincidae (armored grenadiers) as sister lineages, but the exon phylogeny resolves  
752 *Melanonus* (pelagic cods) as the sister lineage of Muraenolepididae. The UCE phylogeny places  
753 Merlucciidae (merluccid hakes) as the sister lineage of an inclusive clade containing Phycidae  
754 (phycid hakes), Lotidae (hakes and burbot), and Gadidae (cods and haddock), but the exon  
755 phylogeny resolves Merlucciidae as the sister lineage of a clade containing *Eulichthys polynemus*  
756 (Eucla cod), Muraenolepididae, *Melanonus*, Trachyrincidae, Moridae, *Macruronus* (blue  
757 grenadiers), *Lyconus* (Atlantic hakes), Bathygadidae (rattails), *Steindachneria argenta*, and  
758 Macrouridae. Lotidae is resolved as monophyletic in the exon phylogeny<sup>179</sup>, but this lineage is  
759 paraphyletic in the UCE phylogeny with *Lota lota* (Burbot) resolved as the sister lineage of a  
760 clade containing *Brosme brosme* (Cusk), *Molva* (lings), and Gadidae (true cods) (Fig. 1,  
761 Supplementary Fig. 1).

762

### 763 **iv. Phylogenetic relationships of Acanthopterygii and resolution of the sister lineage of the** 764 **hyper-diverse Percomorpha**

765 Acanthopterygii includes Trachichthyiformes, Beryciformes, and Percomorpha (Fig. 1). The  
766 earliest molecular studies identified the sister lineage of percomorphs as either a monophyletic  
767 group consisting of Trachichthyiformes and Beryciformes<sup>1,20</sup> or the beryciform subclade  
768 Holocentridae (squirrelfishes)<sup>21</sup>. The UCE inferred phylogeny presented in this study and  
769 previous phylogenomic analyses resolve Trachichthyiformes as the sister lineage to all other  
770 acanthopterygians and Beryciformes, which includes Holocentridae, as the percomorph sister  
771 lineage<sup>4,15,178,180</sup> (Fig. 1, Supplementary Fig. 2). This topology is also the most supported

772 hypothesis in the concordance factor analyses (Extended Data Fig. 1c). The alternative  
773 hypotheses, including the phylogeny that places Holocentridae as sister to Percomorpha,  
774 produced substantially lower Bayesian concordance factor scores with 95% credible intervals  
775 that do not overlap with the scores of the optimal phylogeny (Extended Data Fig. 1c). The UCE  
776 data presented here reject the hypothesis that Holocentridae is the sister lineage of Percomorpha.  
777

### 778 *c. Phylogenetic relationships of Percomorpha*

779 Percomorphs are classified in an astounding 290 taxonomic families<sup>181</sup>, which is more than  
780 living birds (252 families) and many more than mammals (167 families), squamates (58  
781 families), amphibians (67 families), and turtles (11 families)<sup>182-184</sup>. By the middle of the 20th  
782 century the vast majority of percomorph families were delimited and considered monophyletic  
783 groups<sup>175,185</sup>, but relationships among these delimited taxonomic families were woefully  
784 unresolved at the start of the 21st century<sup>186,187</sup>. This lack of phylogenetic resolution among the  
785 nearly 300 taxonomic families led to the now famous analogy that Percomorpha was the “bush at  
786 the top” of the teleost phylogeny<sup>188</sup>. Since the start of the 21st century, however, molecular  
787 studies have offered dramatic resolution of percomorph relationships<sup>1,4,15,21</sup>. The UCE phylogeny  
788 inferred in this study resolves the species sampled from 276 taxonomic families into one of  
789 twelve taxonomic orders that contain more than one family. All 12 of these inclusive lineages are  
790 monophyletic and strongly supported in the UCE phylogeny (Figs. 1,2, Supplementary Figs. 3-  
791 25). Relationships are consistent with previous efforts using Sanger sequenced loci and  
792 phylogenomic analyses, but no prior analysis included a high fraction (276 of 290) of the  
793 percomorph families.

794 The UCE phylogeny has strong node support along the backbone of Percomorpha  
795 including Eupercaria, which is an inclusive clade containing Perciformes, Centrarchiformes,  
796 Labriformes, Acropomatiformes, and Acanthuriformes (Fig. 2, Supplementary Figs. 16-25).  
797 Previous phylogenetic analyses strongly support monophyly of Eupercaria but provide little  
798 resolution and node support for the interrelationships of its constituent lineages<sup>1,15,21</sup>. The only  
799 node in the UCE percomorph phylogeny shared among the delimited 13 taxonomic orders that is  
800 not supported with a bootstrap score of 100% is the resolution of Acropomatiformes and  
801 Acanthuriformes as a clade, which is supported with a bootstrap score of 99% (Supplementary  
802 Fig. 22).

803

804 ***i. The deepest node in the phylogeny of percomorphs: the phylogenetic relationships of***  
805 ***Ophidiiformes***

806 Ophidiiformes (cusk eels) is resolved as the sister lineage to all other percomorphs (Fig. 1).  
807 Relationships within this species-rich lineage of mostly marine fishes are not well known and the  
808 delimitation of taxonomic families is in flux<sup>189</sup>. The UCE phylogeny resolves two clades in  
809 Ophidiiformes that correspond to the suborders Bythitoidei and Ophidioidei (Fig. 1,  
810 Supplementary Fig. 3). Within Bythitoidei, the families Dinematchthyidae (pygmy brotulas) and  
811 Bythitidae (livebearing brotulas) are both monophyletic (Supplementary Fig. 3). As discovered  
812 in previous studies<sup>189-191</sup>, the formerly recognized taxonomic families Parabrotulidae and  
813 Aphyonidae are phylogenetically nested in Bythitidae (Supplementary Fig. 3). Historically,  
814 Ophidioidei contained Ophidiidae and Carapidae, but the UCE phylogeny (Fig. 1,  
815 Supplementary Fig. 3) as well as previous studies using whole mtDNA genome sequences and  
816 Sanger sequenced nuclear genes resolve Carapidae as phylogenetically nested within  
817 Ophidiidae<sup>1,21,119,192</sup>, prompting the synonymization of the family Carapidae with Ophidiidae<sup>174</sup>.

818

819 ***ii. Phylogenetic relationships of Batrachoididae***

820 There is limited taxon sampling of Batrachoididae in the UCE phylogeny, but the subfamily  
821 Batrachoidinae (sampled with *Batrachoides pacifici* and *Opsanus tau*) is paraphyletic  
822 (Supplementary Fig. 3). Porichthyinae is paraphyletic in a phylogeny inferred from Sanger  
823 sequenced mitochondrial and nuclear genes<sup>119</sup>.

824

825 ***iii. Phylogeny of Gobiiformes***

826 One of the most surprising results from molecular analyses of percomorph phylogeny was the  
827 discovery that gobies, cardinalfishes (Apogonidae), and nurseryfishes (Kurtidae) resolve in a  
828 strongly supported monophyletic group<sup>20,193,194</sup>. Subsequent molecular studies resolved two  
829 competing hypotheses of relationships among the major lineages of Gobiiformes: 1) *Kurtus* and  
830 Apogonidae resolved as a clade, or 2) Apogonidae as the sister lineage of a clade containing  
831 *Trichonotus* (sand divers) and Gobioidi<sup>1,4,21,194-198</sup>. The UCE phylogeny in this study resolves  
832 two major lineages in Gobiiformes: the Apogonoidei that contains *Kurtus* and Apogonidae, and a  
833 clade containing *Trichonotus* and Gobioidi (Fig. 1, Supplementary Figs. 3,4). The relationships

834 of the eight taxonomic families classified in Gobioidei are identical to phylogenies inferred using  
835 Sanger sequenced mtDNA and nuclear genes<sup>197,198</sup> (Fig. 1, Supplementary Fig. 4).

836

#### 837 *iv. Phylogenetic relationships of Scombriformes and Syngnathiformes*

838 Scombriformes (e.g., tunas, cutlassfishes and butterfishes) and Syngnathiformes (e.g., seahorses,  
839 flying gurnards and dragonets) are resolved as sister lineages in the UCE phylogeny (Fig. 1), a  
840 result that is consistent with other molecular phylogenetic analyses<sup>1,4,15</sup>. This particular result has  
841 the surprising implication that relative to all other percomorph teleosts, tunas and seahorses are  
842 closely related.

843 Tunas, barracudas, cutlassfishes and swordfishes were historically classified in  
844 Scombroidei. Early phylogenetic analyses of Sanger sequenced mtDNA and nuclear genes  
845 resolved species classified in the traditional delimitation of Scombroidei into two distantly  
846 related percomorph lineages<sup>199</sup>. Xiphiidae (swordfishes), Istiophoridae (billfishes) and  
847 Sphyraenidae (barracudas) were resolved in the clade Carangiformes along with flatfishes, jacks  
848 and archerfishes (Fig. 1)<sup>48</sup>. The remaining lineages of the historical Scombroidei— Scombridae  
849 (tunas), Gempylinae (snake mackerels), Trichiurinae (cultassfishes) and *Pomatomus saltatrix*  
850 (Bluefish)—are resolved in the clade Scombriformes that also includes the stromatioids, e.g.,  
851 Stromateidae (butterfishes) and Chiasmodontidae (swallowers)<sup>29</sup>. Other lineages in  
852 Scombriformes include the enigmatic *Icosteus aenigmaticus* (Ragfish) and *Amarsipus carlsbergi*  
853 (Bagless Glassfish), both of which are deep-branching, monotypic lineages that long evaded  
854 phylogenetic resolution among percomorphs (Fig. 1, Supplementary Fig. 5). The UCE  
855 phylogeny resolves *Lepidocybium flavobrunneum* (Escolar) as the sister lineage of a clade  
856 containing Gempylidae and Trichiuridae (Fig. 1, Supplementary Fig. 6). *Lepidocybium*  
857 *flavobrunneum* is traditionally classified in Gempylidae, which is paraphyletic in the UCE  
858 phylogeny as the remaining gempylids are more closely related to species of Trichiuridae (Fig. 1,  
859 Supplementary Fig. 6). This relationship has previously been resolved in a phylogenetic analysis  
860 using morphological data<sup>122</sup>.

861 Syngnathiformes as consisting of seahorses and pipefishes, flying gurnards, goatfishes,  
862 and dragonets was first resolved as a clade in phylogenetic analyses of Sanger sequenced  
863 mtDNA and nuclear genes<sup>21,200</sup>. Prior to the application of molecular phylogenetics,  
864 Callionymidae (dragonets) and Draconettidae (draconettids) were classified as closely related to

865 Gobiesocidae (clingfishes)<sup>201-204</sup>. As reflected in molecular phylogenies, Pietsch<sup>98</sup> proposed that  
866 Dactylopteridae (helmet gurnards) were closely related to other syngnathiform lineages, but they  
867 were classified by others with the sculpins, rockfishes and scorpionfishes in Scorpaeniformes.  
868 Mullidae (goatfishes) were long classified in the wastebasket taxon Perciformes<sup>175,202,205</sup> but  
869 thought to be closely related to Haemulidae (grunts) and Sparidae (porgies)<sup>206</sup>. The UCE  
870 phylogeny resolves two major lineages of Syngnathiformes: 1) a clade we delimit as Mulloidei  
871 that contains Pegasidae (seamoths), Dactylopteridae, Mullidae, Callionymidae, and  
872 Draconettidae and 2) a lineage we delimit as Syngnathoidei, consisting of Syngnathidae  
873 (pipefishes and seahorses), Solenostomidae (ghost pipefishes), Aulostomidae (trumpetfishes),  
874 Fistularidae (cornetfishes), Centriscidae (shrimpfishes) and Macroramphosidae (snipefishes)  
875 (Fig. 1, Supplementary Figs. 7-9).

876

#### 877 *v. Relationships among Blenniiformes, Synbranchiformes and Carangiformes*

878 The UCE phylogeny resolves a strongly supported monophyletic group where Blenniiformes  
879 (e.g., blennies, cichlids, livebearers, and mullets) is the sister lineage of a clade containing  
880 Synbranchiformes (e.g., swamp eels, gouramies, snakeheads, and leaffishes) and Carangiformes  
881 (e.g., flatfishes, jacks and pompanos, billfishes, and barracudas). The discovery of this clade is  
882 one of the many dramatic results from molecular phylogenetics of percomorphs<sup>1</sup>, as this large  
883 and inclusive group contains more than 7,300 species that are classified into 92 taxonomic  
884 families.

885

#### 886 *vi. Blenniiformes: Phylogenetic relationships of Atherinoidei (Cyprinodontoidea, Belonoidea 887 and Atherinoidea)*

888 The monophyly of Blenniiformes—originally named Ovalentaria—resulted from a phylogenetic  
889 analysis of Sanger sequenced nuclear genes<sup>22</sup>. In the UCE phylogeny, Blenniiformes is  
890 monophyletic and contains two major clades: Atherinoidei (formerly Atherinomorpha) and all  
891 other lineages of Blenniiformes. Atherinoidei contains three major lineages: 1) Belonoidea  
892 (formerly Beloniformes, which includes needlefishes, medakas, halfbeaks, and flying fishes), 2)  
893 Cyprinodontoidea (formerly Cyprinodontiformes, which includes killifishes, rivulines, pupfishes,  
894 and livebearers), and 3) Atherinoidea (formerly Atheriniformes, which includes silversides and  
895 rainbowfishes). Phylogenomic analysis of our UCE dataset results in a well-resolved phylogeny

896 of Atherinoidei, where every node along the backbone of the atherinoid tree is supported with a  
897 100% bootstrap score (Fig. 1, Supplementary Fig. 10). Morphological phylogenies resolve  
898 Atherinoidea as the sister lineage of a clade containing Belonoidea and Cyprinodontoidea<sup>149,207</sup>,  
899 but the UCE phylogeny resolves Atherinoidea and Belonoidea as sister lineages (Fig. 1,  
900 Supplementary Fig. 10).

901 Over the past 15 years, the number of taxonomic families recognized in  
902 Cyprinodontoidea (killifishes, rivulines, pupfishes, and livebearers) increased from 10 to  
903 16<sup>181,186</sup>. The recognition of these six additional families resulted from phylogenetic analyses of  
904 Sanger sequenced mtDNA and nuclear genes that overturned the results of morphological  
905 studies<sup>208-210</sup> and demonstrated the non-monophyly of Cyprinodontidae (pupfishes) and  
906 Poeciliidae (livebearers). The UCE phylogeny (Fig. 1, Supplementary Fig. 10) is consistent with  
907 morphological phylogenetic analyses in the resolution of Rivulidae (New World rivulines),  
908 Aplocheilidae (Asian rivulines), and Nothobranchiidae (African rivulines) as a monophyletic  
909 group, as well as a clade containing Poeciliidae, Anablepidae (four-eyed fishes), *Valencia*  
910 (toothcarps), Procatopodidae (African lampeyes), Fundulidae (topminnows), Cyprinodontidae,  
911 *Profundulus* (Middle American killifishes), Goodeidae (goodeids), and *Cubanichthys* (Caribbean  
912 killifishes)<sup>211,212</sup>. Morphological and molecular phylogenetic studies show congruence on  
913 specific relationships within Cyprinodontoidea. For example, the morphological analysis by  
914 Costa<sup>212</sup> identified *Profundulus* and Goodeidae as a clade. This result is supported in the UCE  
915 phylogeny as well as studies from Sanger sequenced mtDNA and nuclear genes<sup>208-210</sup>. Among  
916 the notable differences between molecular and morphological phylogenies of cyprinodontoids is  
917 the resolution of Cyprinodontidae and Fundulidae as sister lineages (Fig. 1, Supplementary Fig.  
918 10).

919 Belonoidea is monophyletic in the UCE phylogeny, but despite limited taxon sampling  
920 the families Zenarchopteridae and Hemiramphidae are found to be paraphyletic (Fig. 1,  
921 Supplementary Fig. 10). Five families of Belonoidea are recognized in Eschmeyer's Catalog of  
922 Fishes<sup>181</sup>. Phylogenies resulting from analyses of morphological characters and Sanger  
923 sequenced mtDNA nest Scomberesocidae (sauries) well within Belonidae (needlefishes) and  
924 resolve Hemiramphidae (halfbeaks) as paraphyletic relative to Exocoetidae (flyingfishes)<sup>213,214</sup>.  
925 In the UCE phylogeny, the hemiramphid *Oxyporhamphus micropterus* is more closely related to  
926 the sampled species of Exocoetidae than the other two sampled hemiramphids (Fig. 1,



927 Supplementary Fig. 10), as previously inferred using morphological data<sup>215</sup>. The new phylogeny  
928 also resolves *Zenarchopterus dispar* as more closely related to the sampled belonid species  
929 *Xenentodon cancila* than to the other two sampled zenarchopterid species (Fig. 1, Supplementary  
930 Fig. 10).

931 There are 11 taxonomic families of Atherinoidea recognized in Eschmeyer's Catalog of  
932 Fishes<sup>181</sup>, but Notocheiridae is well nested in Atherinopsidae in phylogenetic analyses of Sanger  
933 sequenced mtDNA and nuclear genes<sup>216,217</sup>. Of the ten other families, eight are sampled in the  
934 UCE phylogeny. Missing from the analysis is the monotypic Dentatherinidae (Mercer's tusked  
935 silverside) and Telmatherinidae (Celebes rainbowfishes). The UCE phylogeny is consistent with  
936 current classifications and previous molecular and morphological phylogenetic analyses in  
937 resolving Atherinopsidae (New World silversides) as the sister lineage of all other  
938 atherinoids<sup>1,21,216,218</sup> (Fig. 1, Supplementary Fig. 10). Another area of agreement in the UCE  
939 phylogeny and previous molecular analyses is the resolution of a clade containing the  
940 monogeneric Atherionidae (pricklenose silversides) and Phallostethidae (priapiumfishes)<sup>217</sup> (Fig.  
941 1, Supplementary Fig. 10).

942 There are differences in the recognition of taxonomic families of Atherinoidea in  
943 Eschmeyer's Catalog of Fishes<sup>181</sup> and Nelson et al.<sup>176</sup> that involve lineages associated with  
944 Melanotaeniidae (rainbowfishes). Following Dyer and Chernoff<sup>218</sup>, Nelson et al.<sup>176</sup> treat  
945 Bedotiidae (Madagascar rainbowfishes), Pseudomugilidae (blue eyes), and Telmatherinidae as  
946 subfamilies of Melanotaeniidae. This delimitation of Melanotaeniidae is not supported in the  
947 UCE phylogeny as Bedotiidae is resolved as the sister lineage of Atherinidae (Old World  
948 silversides) (Fig. 1, Supplementary Fig. 10). In previous analyses of Sanger sequenced mtDNA  
949 and nuclear genes, Melanotaeniidae is paraphyletic because the species *Cairinsichthys*  
950 *rhombosomoides* is resolved as the sister lineage of a clade containing all sampled species of  
951 Telmatherinidae and Pseudomugilidae<sup>216,217</sup>; however, in the UCE phylogeny Melanotaeniidae—  
952 sampled with *Cairinsichthys* and *Iriatherina wernerii*—is monophyletic with strong node support  
953 (Fig. 1, Supplementary Fig. 10). The non-monophyly of Melanotaeniidae in previous  
954 phylogenetic analyses is likely driven by limited phylogenetic informativeness of Sanger  
955 sequenced genes to resolve relationships among Atherinoidea, as evidenced by the low bootstrap  
956 and Bayesian posterior node support values associated with these phylogenies<sup>216,217</sup>.

957

958 **vii. Blenniiformes: Phylogenetic relationships of Cichlidae, Pholidichthys and Polycentridae**

959 Within Blenniiformes, the UCE phylogeny resolves a clade containing Cichlidae, *Pholidichthys*  
960 (engineer gobies) and Polycentridae (leaffishes) (Fig. 1, Supplementary Fig. 11). Before the  
961 advent of molecular phylogenetics, the morphology of the pharyngeal jaw apparatus was cited as  
962 evidence to group Cichlidae with Labridae (wrasses and parrotfishes), Embiotocidae  
963 (surfperches), and Pomacentridae (damsel-fishes) in a group named Labroidei<sup>219-222</sup>. Phylogenetic  
964 analyses of ten Sanger sequenced nuclear genes strongly resolved *Pholidichthys* (engineer  
965 gobies) and Cichlidae as sister lineages, but these analyses did not confidently identify a sister  
966 lineage of this clade within the Blenniiformes<sup>1,22</sup>. As recently delimited<sup>223</sup>, Polycentridae  
967 contains five species classified among four genera distributed in freshwater habitats in Africa  
968 and South America: *Afronandus sheljuzhkoii* (Africa), *Polycentropsis abbreviata* (Africa),  
969 *Polycentrus* (two species in South America), and *Monocirrhus polyacanthus* (South America).  
970 The resolution of the freshwater Polycentridae as the sister lineage of the clade containing  
971 *Pholidichthys*-Cichlidae provides insight into the origin of freshwater blenniiform lineages and  
972 the biogeographic relationships of freshwater fishes in South America and Africa<sup>224,225</sup>.

973

974 **viii. Blenniiformes: Relationships of Mugilidae, Ambassidae, Pseudochromidae,**  
975 **Congrogadidae and Pomacentridae**

976 The phylogenetic relationships of Mugilidae (mulletts) have long vexed phylogenetic studies of  
977 acanthomorphs, leading Stiassny<sup>226</sup> to declare in a morphological phylogenetic study that  
978 “without mullets our lives would be a lot simpler.” Morphological analysis of branchial  
979 musculature supported a hypothesis that Mugilidae and Atherinoidei (formerly Atherinomorpha)  
980 are sister lineages<sup>227</sup>, but analysis of pelvic girdle morphology supported an affinity with other  
981 percomorph lineages<sup>226</sup>. The heterogeneity of relationships inferred from these two different  
982 anatomical systems appears explained in the results of molecular phylogenetic analyses with  
983 Mugilidae, Atherinoidei, or other “higher” percomorph lineages sensu Johnson and Patterson<sup>18</sup>  
984 resolved in Blenniiformes. In Sanger sequencing efforts, the sister lineage of Mugilidae within  
985 Blenniiformes varies between Plesiopidae (longfins) and Embiotocidae (surfperches), always  
986 with weak node support<sup>1,22,177</sup>. However, analysis of the UCE dataset and phylogenomic  
987 inferences based on exon data<sup>15</sup> both resolve Mugilidae and Ambassidae as sister lineages with  
988 strong node support (Fig. 1, Supplementary Fig. 11).

989 In phylogenetic studies of Sanger sequenced mtDNA and nuclear genes,  
990 Pseudochromidae (dottybacks) is resolved as paraphyletic relative to Plesiopidae (roundheads)  
991 and Pomacentridae (damsel fishes)<sup>1,21</sup>. In the UCE phylogeny, Pseudochromidae is paraphyletic  
992 because Congrogadidae (eelblennies) is resolved as the sister lineage of a clade containing the  
993 remaining species of Pseudochromidae, Plesiopidae, Pomacentridae, Grammatidae (basslets),  
994 Opistognathidae (jawfishes), Gobiesocidae (clingfishes), and Blennioidei (blennies) (Fig. 1,  
995 Supplementary Fig. 11).

996

997 ***ix. Blenniiformes: Phylogenetic relationships of Grammatidae, Opistognathidae, Gobiesocidae***  
998 ***and Blennioidei***

999 The UCE phylogeny is congruent with trees inferred using exon data and Sanger sequenced  
1000 mtDNA and nuclear genes in resolving a clade containing Grammatidae, Opistognathidae,  
1001 Gobiesocidae, and Blennioidei<sup>1,15,21</sup>, but differs in resolving Embiotocidae (surfperches) as the  
1002 sister lineage of this clade (Fig. 1, Supplementary Fig. 11). Grammatidae and Opistognathidae  
1003 are successive outgroups to a clade containing Gobiesocidae and Blennioidei (Fig. 1,  
1004 Supplementary Fig. 11). In the UCE phylogeny, the relationships among the families of  
1005 Blennioidei—Tripterygiidae (triplefin blennies), Dactyloscopidae (sand stargazers), Blenniidae  
1006 (combtooth blennies), Clinidae (kelp blennies), Labrisomidae (labrisomid blennies), and  
1007 Chaenopsidae (tube blennies)—are nearly identical to those inferred from Sanger sequenced  
1008 mtDNA and nuclear genes<sup>1,21</sup> (Fig. 1, Supplementary Fig. 11). However, a study with the largest  
1009 sampling of blennioid species indicates that Labrisomidae and Chaenopsidae are both  
1010 paraphyletic<sup>228</sup>.

1011

1012 ***x. Phylogenetic relationships of Synbranchiformes***

1013 Previous analyses of Sanger sequenced genes and phylogenomic datasets consistently resolve  
1014 Synbranchioidei (swamp eels, earthworm eels, armored sticklebacks, and freshwater spiny eels)  
1015 and Anabantoidei (gouramies, snakeheads, and Asian leaf fishes) as a clade<sup>1,15,21,22,177</sup>.

1016 One of the many surprises to emerge from the molecular phylogenies of percomorphs  
1017 was the resolution of *Indostomus* (armored sticklebacks) as nested within  
1018 Synbranchioidei<sup>1,177,192,229,230</sup>. Traditionally, *Indostomus* was classified with seahorses,  
1019 shrimpfish, and sticklebacks in the polyphyletic Gasterosteiformes based on the presence of

1020 dermal bony plates along the side of the body, a reduced cranial skeleton, and a small mouth  
1021 size<sup>186</sup>. Analysis of developmental ontogeny of several morphological traits led to the conclusion  
1022 that *Indostomus* is closely related to sticklebacks (Gasterosteidae)<sup>231</sup>. However, *Indostomus* and  
1023 sticklebacks are distantly related in all molecular phylogenies and Gasterosteidae is classified  
1024 here in Perciformes. Aside from the resolution of *Indostomus* as a synbranchoid, specifically as  
1025 the sister lineage of Synbranchidae (swamp eels), the UCE phylogeny of Synbrancoidei is  
1026 identical to relationships inferred from morphology where Synbranchidae is resolved as the sister  
1027 lineage of a clade containing Chaudhuriidae (earthworm eels) and Mastacembelidae (freshwater  
1028 spiny eels)<sup>232</sup> (Fig. 1, Supplementary Fig. 12).

1029 Anabantoidei—delimited here as including Nandidae (Asian leaffishes), Badidae  
1030 (chameleonfishes), Pristolepididae (Malayan leaffishes), Channidae (snakeheads),  
1031 Helostomatidae (Kissing Gourami), Anabantidae (climbing gouramies), and Osphronemidae  
1032 (gouramies and fighting fishes)—is monophyletic in the UCE phylogeny and characterized by  
1033 the unique possession of teeth on the parasphenoid<sup>223,233:9-12</sup>. The UCE phylogeny resolves a  
1034 clade containing Pristolepididae, Nandidae, and Badidae (Fig. 1, Supplementary Figs. 12, 13),  
1035 which is supported with a unique morphology of the ventral gill arch musculature where the  
1036 *rectus ventralis IV* has an additional insertion on the ceratobranchial 5<sup>223,234</sup>. The clade  
1037 containing Badidae and Nandidae is supported with two morphological traits: 1) a distally  
1038 divided haemal spine on the second preural centrum and 2) the restriction of the attachments  
1039 cells in eggs to the ventral side of the yolk sac<sup>223: Figs. 2d-f, 4</sup>. Previous classifications grouped  
1040 Pristolepididae and Badidae in Nandidae<sup>186</sup>. Given that the current delimitation of Nandidae and  
1041 Pristolepididae each contain a single genus and Badidae includes two genera, future  
1042 classifications can reduce monogeneric families and limit redundant taxonomic group names by  
1043 classifying all these lineages in Nandidae.

1044 The UCE phylogeny resolves Channidae, Helostomatidae, Anabantidae, and  
1045 Osphronemidae as a strongly supported monophyletic group (Fig. 1, Supplementary Figs. 12,13).  
1046 This phylogeny differs from those inferred using Sanger sequenced nuclear genes in resolving  
1047 Helostomatidae as the sister lineage of a clade containing Anabantidae and Osphronemidae  
1048 versus Helostomatidae as the sister lineage of Anabantidae or Osphronemidae<sup>1,223</sup>.

1049  
1050

1051 ***xi. Phylogenetic relationships of Carangiformes***

1052 The UCE phylogeny is broadly congruent with other studies using UCEs<sup>48</sup>, but differs in the  
1053 relationships of *Lates*, *Centropomus* (snooks), and *Sphyraena* (barracudas) (Fig. 1,  
1054 Supplementary Fig. 14). Analyses of Sanger sequenced nuclear genes consistently supported the  
1055 monophyly of Carangiformes<sup>1,21,235,236</sup>, but did not strongly support the relationships among the  
1056 major carangiform clades. The UCE phylogeny includes a clade containing Centropomidae  
1057 (sampled with *Lates* and *Centropomus*), *Lactarius lactarius* (False Trevally), and *Sphyraena*.  
1058 Previous analyses using UCEs also resolved Centropomidae as monophyletic<sup>48</sup>, but placed  
1059 *Sphyraena* as the sister lineage of all other Carangiformes. A phylogenetic analysis of  
1060 Carangiformes based on a dataset that combines a smaller number of UCE loci with discretely  
1061 coded morphological characters resolves Centropomidae as paraphyletic with *Lates* and  
1062 *Psammoperca*, forming a clade that is sister to a lineage containing *Centropomus*, *Lactarius* and  
1063 *Sphyraena*<sup>237</sup>.

1064 The UCE phylogeny resolves three major lineages of Carangiformes: 1) an unnamed  
1065 clade (discussed above) containing Centropomidae, *Lactarius*, and *Sphyraena*, 2) an unnamed  
1066 clade containing Polynemidae (threadfins) and Pleuronectoidei (flatfishes), and 3) a clade  
1067 delimited here as Carangoidei that contains *Leptobrama* (beachsalmons), *Toxotes* (archerfishes),  
1068 *Nematistius pectoralis* (roosterfish), *Mene maculata* (moonfish), *Xiphias gladius* (swordfish),  
1069 Istiophoridae (billfishes), and Carangoidea (Fig. 1, Supplementary Figs. 14,15).

1070 As resolved in several analyses using Sanger sequenced loci and UCE-based  
1071 phylogenomic analyses<sup>1,21,25,48,119</sup>, the traditional delimitation of Carangidae (jacks and  
1072 pompanos) is paraphyletic. Carangidae, limited to the subfamilies Naucratinae and Caranginae,  
1073 is the sister lineage of a clade containing the former carangid subfamilies Scomberoidinae and  
1074 Trachinotinae, Echeneidae (remoras), *Rachycentron canadum* (cobia), and *Coryphaena*  
1075 (dolphinfishes) (Fig. 1, Supplementary Fig. 15).

1076

1077 ***xii. Eupercaria: relationships among Perciformes, Centrarchiformes, Labriformes,***  
1078 ***Acropomatiformes and Acanthuriformes***

1079 Phylogenetic analyses of Sanger sequenced loci led to the resolution of Eupercaria, an inclusive  
1080 clade that contains more than 37% of species and 53% of all taxonomic families in  
1081 Percomorpha<sup>174</sup>. While earlier studies resolved a clade containing Perciformes,

1082 Centrarchiformes, Labriformes, Acropomatiformes, and Acanthuriformes, phylogenies inferred  
1083 from Sanger sequenced genes provided little resolution for the relationships among the major  
1084 lineages of Eupercaria<sup>1,21</sup>. Analysis of the UCE dataset results in a phylogeny where Eupercaria  
1085 is resolved as a clade with strong support for the relationships among the major lineages;  
1086 Perciformes, Centrarchiformes, and Labriformes are found to be successive outgroups to a clade  
1087 containing Acropomatiformes and Acanthuriformes. All of the nodes along the backbone of the  
1088 eupercarian phylogeny are supported with bootstrap values of 100% except the clade containing  
1089 Acropomatiformes and Acanthuriformes (BSS = 99%) (Fig. 2, Supplementary Fig. 22). The  
1090 phylogenomic analyses of the UCE loci resolve this substantial issue of the teleost phylogeny,  
1091 which was once identified as the new bush on the top of the percomorph phylogeny<sup>21</sup>.

1092

### 1093 *xiii. Phylogenetic relationships of Perciformes*

1094 Prior to the application of molecular data to investigate the phylogenetic relationships of teleosts,  
1095 the vast majority of percomorphs were classified in the catchall taxon Perciformes. In addition to  
1096 perciforms, percomorphs included morphologically unique and disparate lineages such as  
1097 Pleuronectiformes (flatfishes), Tetraodontiformes (pufferfishes), and Gasterosteiformes  
1098 (sticklebacks and seahorses). Any lineage of percomorph that was not as morphologically  
1099 distinctive as a flatfish or seahorse was classified in Perciformes. At the end of the 20th century  
1100 Perciformes contained more than 10,000 species and 160 taxonomic families<sup>186</sup>. Phylogenetic  
1101 analyses of molecular datasets revealed that the perciform wastebasket contained lineages that  
1102 spanned much of the backbone of the Percomorpha phylogeny. The UCE phylogeny offers a  
1103 confirmation for the disassembly of Perciformes that involves the migration of more than 100  
1104 taxonomic families into nearly all other major lineages of Percomorpha.

1105 An entirely different concept and delimitation of Perciformes emerged from molecular  
1106 phylogenetic studies<sup>1,19,21,177,187,193,238-241</sup>. No longer a taxonomic wastebasket, Perciformes (as  
1107 delimited here) contains more than 3,200 species that are classified among at least 53 taxonomic  
1108 families and comprises a diverse array of lineages that not only were previously classified as  
1109 perciforms, but also as scorpaeniforms and gasterosteiforms<sup>3,176</sup>. In addition to the namesake  
1110 Percidae (perches, walleyes, and darters), the newer concept of Perciformes resulting from  
1111 molecular phylogenetic analyses includes seabasses, scorpionfishes, rockfishes, sculpins,

1112 searobins, weaverfishes, notothenioids, eelpouts, sticklebacks, flatheads, and many others  
1113 (Supplementary Table 3).

1114 Molecular analyses consistently resolve the traditional delimitation of Serranidae (sea  
1115 basses), which contains more than 60 genera and 450 species, as non-monophyletic in  
1116 Perciformes<sup>1,187,241</sup>. In the UCE phylogeny, taxa comprising the traditional Serranidae resolve in  
1117 four or five different lineages (Supplementary Fig. 16). Epinephelidae (groupers) and  
1118 Anthiadidae (basslets and anthians) are resolved as successive sister lineages or as a  
1119 monophyletic group that is the sister lineage of all other Perciformes. The less inclusive  
1120 delimitation of Serranidae is strongly resolved as the sister lineage of Bembropidae (duckbills).  
1121 *Acanthistius* is resolved as either the sister lineage of Anthiadidae, where it is traditionally  
1122 classified, or as the sister lineage of all other perciforms except Epinephelidae and Anthiadidae.  
1123 The enigmatic *Niphon spinosus*, which has long avoided a confident phylogenetic or taxonomic  
1124 placement<sup>242,243</sup>, strongly resolves as the sister lineage of Percidae (Fig. 2, Supplementary Fig.  
1125 16).

1126 In addition to the non-monophyly of the traditional Serranidae, the molecular phylogeny  
1127 of Perciformes provides several strongly supported relationships that were not anticipated from  
1128 inferences using morphological characters<sup>18,205,244</sup>. The UCE phylogeny is congruent with earlier  
1129 analyses using Sanger sequenced loci but provides greater resolution and node support than  
1130 obtained in earlier efforts. The commercially and scientifically important freshwater lineage  
1131 Percidae is resolved in a clade that contains the marine *Niphon spinosus* and Trachinidae  
1132 (weaverfishes), a lineage we refer to as Percoidei (Fig. 2, Supplementary Fig. 16, Supplementary  
1133 Table 3). Notothenioidei includes the well-known Antarctic adaptive radiation as well as  
1134 *Percophis brasiliensis* (Brazilian Flathead), which is distributed in the Atlantic Ocean from the  
1135 coast of southern Brazil to central Argentina<sup>245</sup>. Notothenioidei is strongly resolved as the sister  
1136 lineage of a new delimitation of Scorpaenoidei that includes almost all the lineages traditionally  
1137 classified in Scorpaeniformes such as Platycephalidae (flatheads), Scorpaenidae (scorpionfishes  
1138 and rockfishes), Triglidae (searobins), Bembridae (deepwater flatheads), Platycephalidae  
1139 (flatheads), Hoplichthyidae (ghost flatheads), Hexagrammidae (greenlings), Trichodontidae  
1140 (sandfishes), Cyclopteridae (lumpfishes), Liparidae (snailfishes), and Cottidae (sculpins). In  
1141 addition to these classic scorpaeniform lineages the new delimitation of Scorpaenoidei includes

1142 Zoarcoidea (eelpouts, ronquils, and wolffishes) and Gasterosteioidea (sand eel, tubesnouts, and  
1143 sticklebacks) (Fig. 2, Supplementary Figs. 17, 18).

1144 The UCE phylogeny of Scorpaenoidei is quite different from trees inferred using a  
1145 dataset of morphological characters and Sanger sequenced mtDNA and nuclear genes<sup>246</sup>. For  
1146 example, Smith et al.<sup>246</sup> resolved Platycephalidae as the sister lineage of Triglidae, but the UCE  
1147 phylogeny places Platycephalidae as the sister lineage of all other scorpaenoids (Fig. 2,  
1148 Supplementary Fig. 17). In the UCE tree there are three major clades of Scorpaenoidei that  
1149 contain multiple taxonomic families, but several families resolve along the backbone of the  
1150 scorpaenoid phylogeny. Scorpaenoidea is here delimited as a strongly supported clade that  
1151 includes *Normanichthys crockeri* (Mote Sculpin), Neosebastidae (gurnard scorpionfishes),  
1152 Congiopodidae (horsefishes), Synanceiidae (stonefishes), and Scorpaenidae (Fig. 2,  
1153 Supplementary Fig. 17). Bembridae, Triglidae, and Anoplopomatidae (sablefishes) resolve as  
1154 successive sister lineages to a large clade containing all the lineages classified in Cottoidea  
1155 (sculpins), Gasterosteioidea, and Zoarcoidea (Fig. 2, Supplementary Figs. 18, 19, Supplementary  
1156 Table 3).

1157 Gasterosteioidea and Zoarcoidea resolve as sister lineages with strong node support,  
1158 which is a result supported in earlier phylogenetic analyses of Sanger sequenced mtDNA and  
1159 nuclear genes<sup>1,21</sup>. Within Zoarcoidea the Bathymasteridae (ronquils) are resolved as the sister  
1160 lineage of all other zoarcoids. In an earlier study using Sanger sequenced loci, Bathymasteridae  
1161 was resolved as paraphyletic<sup>1</sup>, but the UCE phylogenetic analyses sample all three bathymasterid  
1162 genera and strongly support the lineage as a monophyletic group (Supplementary Fig. 18).  
1163 *Scytalina cerdale* (Graveldiver) is nested well within Stichaeidae (Supplementary Fig. 18) while  
1164 *Gymnoclinus cristulatus* (Trident Prickleback) is distantly related to other stichaeids  
1165 (Supplementary Fig. 19), resolving as the sister lineage of Neozoarcidae. Previous phylogenetic  
1166 analyses of morphology and Sanger sequenced mtDNA and nuclear genes resolve Stichaeidae as  
1167 paraphyletic<sup>247-249</sup>. The zoarcoid lineages *Cryptacanthodes* (wrymouths), Lumpenidae  
1168 (pricklebacks), *Zaprora silenus* (Prowfish), Opisthocentridae (ocellated blennies), *Ptilichthys*  
1169 *goodei* (Quillfish), Pholidae (gunnels), *Gymnoclinus*, Neozoarcidae, Anarhichadidae  
1170 (wolffishes), and Zoarcidae (eelpouts) resolve as a strongly supported clade that is the sister  
1171 lineage of the paraphyletic Stichaeidae (Fig. 2, Supplementary Figs. 18,19).

1172



1173 ***xiii. Phylogenetic relationships of Centrarchiformes***

1174 Phylogenetic analyses of Sanger sequenced mtDNA and nuclear genes led to the discovery of  
1175 Centrarchiformes, a clade of approximately 300 species classified in at least 16 taxonomic  
1176 families<sup>1,21,236,250,251</sup>. Consistent with these earlier phylogenetic studies<sup>1,21,250,251</sup>, the UCE  
1177 phylogeny resolves *Percalates* as the sister lineage of all other Centrarchiformes (Fig. 2,  
1178 Supplementary Fig. 20). Terapontoidei includes Girellidae (nibblers), Scorpididae (halfmoons),  
1179 *Dichistius*, Microcanthidae, *Oplegnathus* (knifejaws), Kyphosidae (sea chubs), *Kuhlia* (flagtails),  
1180 and Terapontidae (grunters) (Supplementary Fig. 20). Centrarchoidei is delimited here as a clade  
1181 that includes *Enoplosus armatus* (Oldwife) and Percichthyidae (temperate perches),  
1182 Centrarchoidea which includes Centrarchidae (sunfishes, blackbasses, and pygmy sunfishes) and  
1183 Sinipercidae (Chinese perches), and Cirrhitoidea which includes Cirrhitidae (hawkfishes),  
1184 Latridae (trumpeters), *Chironemus* (kelpfishes), *Cheilodactylus*, and *Aplodactylus* (marblefishes)  
1185 (Fig. 2, Supplementary Fig. 20, Supplementary Table 3).

1186 The classification of Centrarchiformes is dynamic and unsettled, reflected in part by a  
1187 high proportion of families that contain a single genus. Molecular phylogenies consistently  
1188 resolve two sets of traditionally delimited centrarchiform families as non-monophyletic. First,  
1189 the two species of *Percalates* were traditionally classified as Percichthyidae<sup>244</sup>, but resolve as the  
1190 sister lineage of all other centrarchiforms<sup>1,21,174,236,250</sup>. There is no described taxonomic family to  
1191 accommodate the classification of *Percalates*. Second, the classification of families within  
1192 Cirrhitoidea was dramatically realigned as a result of molecular phylogenetic analyses.  
1193 Traditionally, Cheilodactylidae (morwongs) contained three to five genera and approximately 20  
1194 species<sup>202,252</sup>. Previous phylogenetic analyses of mtDNA genes, morphological characters, and  
1195 UCE data resolved Cheilodactylidae as polyphyletic, with all but two of the species traditionally  
1196 classified as cheilodactylids nested within a paraphyletic Latridae<sup>253-255</sup>. The findings of these  
1197 phylogenetic analyses resulted in a transfer of these species to Latridae from Cheilodactylidae.  
1198 The new UCE phylogeny is consistent with these previous results, but differs from the  
1199 phylogeny presented in Ludt et al.<sup>255</sup> in resolving *Aplodactylus* rather than *Chironemus* as the  
1200 sister lineage of *Cheilodactylus* (Fig. 2, Supplementary Fig. 20).

1201  
1202  
1203

1204 ***xiv. Phylogenetic relationships of Labriformes***

1205 The UCE phylogeny strongly resolves a clade we delimit as Labriformes which contains two  
1206 major lineages: Uranoscoipoidei and Labroidei (Supplementary Fig. 21). As resolved in previous  
1207 phylogenies inferred from Sanger sequenced nuclear genes<sup>198</sup>, Uranoscoipoidei contains  
1208 Uranoscopidae (stargazers), Ammodytidae (sandlances), and Pinguipedidae (sandperches) as  
1209 successive sister lineages to a clade containing the enigmatic *Cheimarrichthys fosteri*  
1210 (Torrentfish) and Leptoscopidae (southern sandfishes) (Fig. 2, Supplementary Fig. 21).  
1211 Morphological studies place *Cheimarrichthys* as closely related to Pinguipedidae or as the sister  
1212 lineage of all “trachinoids,” which include all the lineages delimited here as Uranoscoipoidei<sup>256-</sup>  
1213 <sup>258</sup>. The hypothesis that *Cheimarrichthys* and Pinguipedidae share common ancestry was rejected  
1214 through the discovery that *Cheimarrichthys* shares more derived morphological character states  
1215 with Leptoscopidae than any other “trachinoid” or uranoscoipoidei lineage<sup>259</sup>. Reflective of their  
1216 shared common ancestry, *Cheimarrichthys* and Leptoscopidae have a similar geographic  
1217 distribution; *Cheimarrichthys* is an anadromous species widely distributed among the rivers of  
1218 New Zealand and leptoscoipids are distributed along the Pacific and Indian coasts of Australia  
1219 and New Zealand<sup>260,261</sup>.

1220 Labroidei includes the sister lineages *Centrogenys vaigiensis* (False Scorpionfish) and  
1221 Labridae (wrasses and parrotfishes) (Fig. 2, Supplementary Fig. 21). As discussed above  
1222 regarding Blennioformes, the species rich marine Labridae and the freshwater Cichlidae were  
1223 hypothesized as closely related based on the morphology of the modified “labroid” pharyngeal  
1224 jaw apparatus<sup>219-221</sup>, which is now known to have originated multiple times in Percomorpha<sup>22</sup>.  
1225 Previous molecular phylogenetic analyses using Sanger sequenced nuclear genes demonstrated  
1226 that labrids and cichlids are not closely related despite both having modified “labroid”  
1227 pharyngeal jaws, but these early molecular studies resulted in an ambiguous and poorly  
1228 supported resolution of the species rich Labridae<sup>1,22</sup>. The resolution of Labridae and *Centrogenys*  
1229 *vaigiensis* as sister lineages in the UCE phylogeny is interesting as both lineages have all three  
1230 components of the modified labroid pharyngeal jaw apparatus<sup>22</sup>.

1231

1232 ***xv. Phylogenetic relationships of Acropomatiformes***

1233 The discovery of Acropomatiformes resulted entirely from phylogenetic analyses of Sanger  
1234 sequenced mtDNA and nuclear and genes<sup>1,198,236,245</sup> and was never intimated through the study of

1235 morphology<sup>205,244</sup>. The lineage is an odd assortment of deep sea and near shore percomorph  
1236 lineages that were previously classified in the wastebasket version of Perciformes and the  
1237 demonstrably polyphyletic Trachinoidei<sup>1,198,245</sup>. While molecular studies consistently resolve  
1238 Acropomatiformes as a clade, its monophyly is not strongly supported with Bayesian posteriors  
1239 or bootstrap values and relationships within the clade differ dramatically across  
1240 studies<sup>1,198,236,245,262</sup>.

1241 The UCE phylogeny resolves Acropomatiformes as monophyletic with 100% bootstrap  
1242 support (Fig. 2, Supplementary Fig. 22). All but two nodes within Acropomatiformes are present  
1243 in 100% of the bootstrap replicates. First, the clade containing *Bathyclupea* (deepsea herrings),  
1244 *Champsodon* (gapers), Creediidae (sandburrowers), and Hemerocoetidae (signalfishes) is  
1245 supported with a bootstrap score of 97%. Second, the clade containing *Scombrops*  
1246 (gnomefishes), Symphysanodontidae (slopefishes), Epigonidae (deepwater cardinalfishes), and  
1247 Howellidae (oceanic basslets) is supported with a 99% bootstrap score (Fig. 2, Supplementary  
1248 Fig. 22). The relationships among acropomatiforms in the UCE tree are quite different from any  
1249 previous study and include the non-monophyly of Polyprionidae (wreckfishes) as *Polyprion* is  
1250 resolved as the sister lineage of a clade containing *Glaucosoma* (pearl perches), Pempheridae  
1251 (sweepers), and *Lateolabrax* (Asian seaperches) while *Stereolepis* is the sister lineage of a clade  
1252 containing *Banjos* (banjofishes) and Pentacerotidae (armorheads). The resolution of Howellidae  
1253 and Epigonidae as sister lineages in the UCE phylogeny is interesting in the context of four  
1254 osteological traits shared between these two lineages and the possibility of additional shared  
1255 traits in Howellidae and other acropomatiform lineages<sup>263</sup>. Future phylogenetic studies will  
1256 round out the sampling of Acropomatiformes by including *Dinolestes lewini* (Long-finned Pike),  
1257 Malakichthyidae (temperate ocean-basses), and Synagropidae (splitfin ocean-basses) to take  
1258 advantage of the strong phylogenetic resolution provided by the UCE loci for this clade.

1259

#### 1260 *xvi. Phylogenetic relationships of Acanthuriformes*

1261 The first wave of molecular phylogenetic analyses of percomorphs was based on whole  
1262 mitochondrial genomes and small sets of Sanger sequenced mitochondrial and nuclear genes.  
1263 The major lineages of percomorphs and their composition began to emerge because of these  
1264 molecular phylogenetic analyses. The monophyly of the major percomorph lineages and their  
1265 relationships to one another are well resolved in the UCE phylogeny and we delimit these

1266 inclusive clades as taxonomic orders (e.g., Gobiiformes, Scombriformes, and Perciformes).  
1267 Hampering these earliest molecular phylogenetic studies of percomorphs was a lack of  
1268 phylogenetic resolution for relationships within and between major lineages of Eupercaria which  
1269 include Perciformes, Centrarchiformes, Acropomatiformes, and what Smith et al.<sup>25</sup> delimit as  
1270 Acanthuriformes. The lack of phylogenetic resolution was particularly acute in Acanthuriformes,  
1271 a lineage that includes more than 2,320 species classified in 56 taxonomic families. The  
1272 phylogenies resulting from earlier molecular studies resolved taxonomic families within  
1273 Acanthuriformes as monophyletic with high bootstrap support [e.g., Chaetodontidae  
1274 (butterflyfishes), Acanthuridae (surgeonfishes), and Sparidae (porgies)], but had very poor  
1275 support for relationships among these lineages<sup>1,21,25</sup>.

1276 Acanthuriformes is monophyletic in the UCE phylogeny with strong bootstrap node  
1277 support; however, six nodes along the backbone of the acanthuriform phylogeny have bootstrap  
1278 scores ranging from 70% to 94% (Fig. 2, Supplementary Figs. 22-24). Despite this lower support  
1279 for a small portion of the acanthuriform phylogeny, the UCE tree provides insight into several  
1280 issues not resolved in earlier molecular studies of percomorph phylogenetics. First, Gerreidae  
1281 (morjarras), which long evaded phylogenetic resolution, is the sister lineage of all other  
1282 Acanthuriformes (Fig. 2, Supplementary Fig. 22). Second, Moronidae (temperate basses) and  
1283 Sillaginidae (whitings) are resolved here as sister lineages (Fig. 2, Supplementary Fig. 22).  
1284 Though they were resolved as a closely related in earlier molecular studies<sup>1</sup>, Lutjanidae and  
1285 Haemulidae are distantly related in the UCE phylogeny (Fig. 2, Supplementary Fig. 22,23).  
1286 Finally, ten lineages identified as *incertae sedis* within Eupercaria by Betancur-R et al.<sup>174</sup> are  
1287 phylogenetically resolved with moderate to high bootstrap support in Acanthuriformes (Fig. 2,  
1288 Supplementary Figs. 22-24).

1289 One of the most surprising findings from molecular studies of the teleost phylogeny was  
1290 the resolution of Lophioidei (anglerfishes, formerly Lophiiformes) and Tetraodontoidei (puffers  
1291 and molas, formerly Tetraodontiformes) as sister lineages<sup>1,4,15,19-21,192</sup>. An analogous  
1292 rearrangement within Mammalia in terms of divergence times might be recognition of a clade of  
1293 marsupials as the sister lineage of primates. In morphology-based classifications, the lophioids  
1294 were placed in Paracanthopterygii<sup>186,264</sup>, phylogenetically distant from other percomorph  
1295 lineages. This migration of lophioids as paracanthopterygians into a derived clade of  
1296 percomorphs is among the most significant changes in 21st century vertebrate phylogenetics.

1297 While the discovery that Lophioidei and Tetraodontoidei are closely related was based on  
1298 phylogenetic analyses of molecular data, subsequent investigation of their morphology identified  
1299 several soft tissue characters that are likely synapomorphies of a lophioid-tetraodontoid clade<sup>265</sup>.  
1300 It has also been discovered that the larvae of these two lineages exhibit unique morphology and  
1301 pigmentation<sup>266</sup>. Congruent with earlier studies, the UCE tree resolves an inclusive lineage  
1302 containing *Siganus* (rabbitfishes), Scatophagidae (scats), Priacanthidae (bigeyes), Cepolidae  
1303 (bandfishes), and Caproidae (boarfishes) as the sister lineage of the Lophioidei-Tetraodontoidei  
1304 clade. These nodes in the UCE phylogeny are all characterized by high bootstrap support values  
1305 (Fig. 2, Supplementary Figs. 24,25).

1306

### 1307 *xvii. Acanthuriformes: phylogenetic relationships of Tetraodontoidei*

1308 Some of the earliest phylogenetic analyses of ray-finned fishes focused on relationships within  
1309 Tetraodontoidei, resulting in numerous phylogenetic analyses based on morphological and  
1310 molecular datasets<sup>21,169,267-274</sup>. While there are important differences among nearly all the  
1311 phylogenies of tetraodontoids, most analyses consistently resolve three to four sets of sister  
1312 lineages that include Triacanthodidae (spikefishes)-Triacanthidae (triplespines), Diodontidae  
1313 (porcupinefishes)-Tetraodontidae (puffers), Balistidae (triggerfishes)-Monacanthidae (filefishes),  
1314 and Aracanidae (deepwater boxfishes)-Ostraciidae (boxfishes)<sup>1,21,169,267,274</sup>, but all these  
1315 phylogenies differ in how these lineages relate to one another. They are also incongruent  
1316 regarding the relationships of *Triodon macropterus* (Threetooth Puffer) and Molidae (molas and  
1317 ocean sunfishes). The UCE phylogeny and most of the earlier molecular phylogenies do not  
1318 resolve the subclade formerly named Tetraodontoidei, which contained Triodontidae, Molidae,  
1319 Diodontidae, and Tetraodontidae<sup>1,21,269-272</sup>. The monophyly of this group was inferred, in part,  
1320 based on the beak-like teeth in the upper and lower jaws and on a non-protractile upper jaw<sup>169</sup>.

1321 The relationships of Tetraodontoidei in the UCE phylogeny are strongly supported with  
1322 high bootstrap values at every node (Fig. 2, Supplementary Fig. 24), but differ from all previous  
1323 topologies inferred using morphology, molecules, or combined morphological and molecular  
1324 datasets. The UCE phylogeny resolves the relationships of *Triodon* and Molidae and contains  
1325 three major lineages: 1) a clade containing *Triodon*, Aracanidae, and Ostraciidae, 2) a clade  
1326 containing Triacanthodidae, Triacanthidae, Balistidae, and Monacanthidae, and 3) a clade  
1327 containing Molidae, Diodontidae, and Tetraodontidae (Fig. 2, Supplementary Fig. 24).

1328 ***xviii. Acanthuriformes: phylogenetic relationships of Lophioidei***

1329 The UCE phylogeny includes 16 of 18 recognized taxonomic families of Lophioidei; the  
1330 monotypic Centrophrynidae and Lophichthyidae are not sampled. Phylogenies of Lophioidei  
1331 inferred from morphological characters, whole mtDNA genome sequences, and Sanger  
1332 sequenced mtDNA and nuclear genes all differ from one another<sup>1,21,275,276</sup>. Congruent with all  
1333 other phylogenetic analyses, the UCE phylogeny resolves the Lophiidae (goosefishes) as the  
1334 sister lineage of all other Lophioidei (Fig. 2, Supplementary Fig. 25). It is also congruent with a  
1335 previous phylogenetic analysis of lophioids in resolving Ogocephalidae (batfishes) as the sister  
1336 lineage of a clade previously named Antennarioidei that contains Antennariidae (frogfishes),  
1337 Tetrabrachiidae (tetrabranched frogfishes), and Brachionichthyidae (handfishes)<sup>277</sup>. All nodes  
1338 along the backbone of the UCE lophioid phylogeny have high bootstrap support (Fig. 2,  
1339 Supplementary Fig. 25).

1340 The UCE phylogeny is congruent with previous molecular phylogenetic analyses in  
1341 resolving Chaunacidae (coffinfishes) as the sister lineage of the eleven taxonomic families that  
1342 comprise the deepsea anglerfishes<sup>1,21,275</sup>, delimited here as Ceratioidea (Fig. 2, Supplementary  
1343 Fig. 25, Supplementary Table 3). The UCE phylogeny and previous molecular analyses using  
1344 whole mitochondrial genomes resolve Thaumichthyidae (wolftap anglers) as paraphyletic with  
1345 *Lasiognathus* nested within Oneirodidae (dreamers)<sup>275</sup>. Within the ceratioids, the UCE  
1346 phylogeny resolves *Neoceratias spinifer* (Toothed Seadevil), Linophrynidae (leftvents), and  
1347 Ceratiidae (seadevils) as a monophyletic group (Fig. 2, Supplementary Fig. 25). These three  
1348 lineages all exhibit male obligate sexual parasitism and dramatically altered their immune  
1349 systems through losing the capacity for somatic diversification of antigen receptor genes<sup>278</sup>. All  
1350 previous morphological and molecular phylogenetic analyses of ceratioids resulted in the non-  
1351 monophyly of the lineages exhibiting obligate male sexual parasitism, implying multiple origins  
1352 of this unique reproductive mode<sup>275,278,279</sup>. In contrast, the UCE phylogeny implies a single  
1353 evolutionary origin of this unique trait (Fig. 2, Supplementary Fig. 25).

1354

1355 ***d. ASTRAL-III species tree analysis***

1356 The ASTRAL-III inferred summary species tree is similar to the phylogeny inferred from  
1357 the concatenated data analyses (Figs. 1,2, Supplementary Figs. 1-25) in resolving Lampriformes  
1358 as the sister lineage of a monophyletic Paracanthopterygii, monophyly of Acanthopterygii, and

1359 very similar relationships among the major lineages of Percomorpha (Supplementary Fig. 26).  
1360 The non-collapsed species tree is available on Dryad. The ASTRAL-III species tree differs from  
1361 the concatenated-dataset, maximum likelihood phylogeny in the inference of Trachichthyiformes  
1362 and Beryciformes as a clade that is sister to Percomorpha, the gadiform *Bregmaceros* as the  
1363 sister lineage of a clade containing *Stylephorus* and all other gadiforms, the placement of  
1364 *Centrogenys*, and the non-monophyly of Acropomatiformes and Labriformes. The ASTRAL-III  
1365 species tree also does not resolve Gerreidae as the sister lineage of all other Acanthuriformes. In  
1366 general, the phylogenetic placement of major euperuvian clades in the tree estimated under the  
1367 multi-species coalescent model differs from the topology of the concatenated-dataset, maximum  
1368 likelihood trees, but nodal support values were significantly stronger for the backbone  
1369 relationships inferred using maximum likelihood methods (Supplementary Figs. 1-26).

1370

#### 1371 *e. Divergence-time estimates*

1372 For both the 702- and 1,084-taxon phylogenies, our relaxed-clock molecular dating analyses  
1373 estimated similar stem lineage ages across the multiple subsamples of UCE loci, with  
1374 overlapping 95% highest posterior densities for most nodes (Supplementary Table 4). There  
1375 were also no observable differences in the median node heights reported in Maximum Clade  
1376 Credibility trees built using post-burn-in trees that were randomly sampled (as in the tree  
1377 represented in Figs. 1,2), or using post-burn-in trees that were systematically sampled after a  
1378 certain number of MCMC iterations (Supplementary Table 4).

1379 Our age estimates are largely in agreement with those presented in previous  
1380 phylogenomic analyses of ~1,000 UCE loci<sup>4</sup> and ~1,100 exons<sup>15</sup> (Supplementary Fig. 29). For  
1381 most major clades, our analyses inferred slightly older stem ages, but with 95% highest posterior  
1382 densities that overlap with the dates reported in previous studies (Supplementary Fig. 29).  
1383 However, our analyses inferred comparably younger stem lineage ages for *Polymixia*,  
1384 Percopsiformes, and clades within Euperuvia<sup>4,15</sup>. Our stem lineage age estimates are  
1385 significantly older for Gobiiformes and the Syngnathiformes-Scombriformes clade<sup>4</sup>. Perhaps as a  
1386 result of incongruent phylogenetic topologies, our analyses inferred younger stem age estimates  
1387 for Acanthuriformes than estimated in the phylogenomic analysis of exon data<sup>15</sup>.

1388 We similarly estimate crown lineage ages for major clades with 95% highest posterior  
1389 densities that largely overlap with previous phylogenomic analyses<sup>4,15</sup>. Exceptions include the

1390 crown age estimates of Acanthuriformes, Syngnathiformes and Scombriformes,  
1391 Trachichthyiformes, Beryciformes, Gobiiformes, Syngnathiformes and Blenniiformes. Many of  
1392 the discrepancies in crown ages likely result from differences among inferred phylogenetic trees  
1393 (especially within Eupercaria), or from the relatively sparse taxon sampling in previous  
1394 phylogenomic studies<sup>4,15</sup>.

1395

#### 1396 *f. Diversification rate analyses*

1397 Our results do not support a significant effect of the K-Pg on acanthomorph lineage  
1398 diversification rates. TESS-CoMET results indicate constant tree-wide diversification rates  
1399 through most of the history of Acanthomorpha, with no evidence of a mass extinction (Extended  
1400 Data Fig. 3). Although Extended Data Fig. 3e suggest a brief increase in the global net-  
1401 diversification (speciation minus extinction) rate at approximately 50 mya (followed by a  
1402 decline), we observe very low Bayesian support for these rate shifts (Extended Data Fig. 3b,d).  
1403 Parameter estimates for speciation and extinction rates converged in all TESS-CoMET runs (ESS  
1404 values > 200 and Geweke statistics within the 95% confidence intervals for all time points).  
1405 Convergence results for the CoMET run visualized in Extended Data Fig. 3 are available in  
1406 Supplementary Fig. 30. All replicate analyses produced diversification plots that were virtually  
1407 indistinguishable from one another. The results of the Gelman-Rubin test, which calculates the  
1408 ratio of within-sample variance to between-sample variance, ensured that rate parameters and  
1409 shift time parameters converged across the independent, replicate analyses (Rubin-Gelman  
1410 statistic < 1.05) (Supplementary Fig. 31).

1411 The CoMET results do report moderately supported shifts ( $2 \leq 2\ln$  Bayes Factors  $\leq 6$ ) in  
1412 speciation and extinction rates in the last 10 million years (Extended Data Fig. 3a-e). We  
1413 strongly suspect, however, that these shifts are an artefact of the CoMET model, perhaps due to  
1414 how it accounts for incomplete taxon sampling. This suspicion is supported by diversification  
1415 patterns reported in numerous other studies<sup>10,280-282</sup>, which all demonstrate (often dramatic) rate  
1416 shifts close to the present-day. It remains unclear how these recent patterns may affect the  
1417 inference of older rate shifts. May et al.<sup>283</sup> describe that more recent mass extinction events may  
1418 cause a “shadow effect” that diminishes the signal of earlier mass extinctions. As it stands, we  
1419 have no evidence that the rate shift we observe in the mid- to late-Neogene could be  
1420 overshadowing or weakening a signal for an earlier shift in diversification rates.



1421           Indeed, our tests of relative model fit in TESS corroborate CoMET's estimate of constant  
1422 diversification rates (Extended Data Table 1). Pairwise comparisons of marginal likelihoods  
1423 using Bayes Factors suggested that a constant branching-process model best represents the  
1424 pattern of diversification in Acanthomorpha. In general, this test of relative model fit strongly  
1425 favored models assuming uniform sampling methods over diversified methods. Therefore, after  
1426 the model assuming a constant birth-death process and uniform sampling, the next most-favored  
1427 branching process models were an episodic model that accounted for a rate shift 50 mya (in  
1428 accordance with the blip in net-diversification rates from the CoMET analysis) and a model with  
1429 speciation rates that decreased through time, both of which assumed uniform sampling. The  
1430 predictive distributions of the gamma statistic, number of taxa, and lineage-through-time (LTT)  
1431 plots for the three most-favored branching process models are reported in Supplementary Fig. 32.  
1432 The models assuming a tree-wide rate shift at 50 my or a decreasing speciation rate produce  
1433 posterior-predictive distributions that are in accordance with the empirical estimates from the  
1434 time-calibrated acanthomorph phylogeny (Supplementary Fig. 32b,c,e,f,h,i). However, the  
1435 distribution under a simpler, constant rate model is also in agreement and appears to produce the  
1436 most similar LTT plots to the empirical data (Supplementary Fig. 32a,d,g).

1437           There is controversy surrounding the popular macroevolutionary modeling program  
1438 BAMM<sup>284,285</sup>, so indications of lineage diversification rate heterogeneity in the time-calibrated  
1439 acanthomorph phylogeny are viewed with a degree of skepticism. Since the size of the  
1440 phylogeny is so large, in every analysis BAMM estimated multiple shift configurations that were  
1441 relatively equiprobable. We therefore chose not to examine configurations with the maximum a  
1442 posteriori probability. Rather, for each analysis we chose to interrogate the maximum shift  
1443 credibility (MSC) configuration, which considers only configurations sampled in the reversible-  
1444 jump MCMC simulations and maximizes the product of the marginal branch-specific shift  
1445 probabilities. In the 23 BAMM analyses that were conducted using the time-calibrated 1,084-  
1446 taxon phylogeny, MSC configurations inferred anywhere between 22 and 33 well-supported rate  
1447 shifts (Supplementary Fig. 33). The regression line in Supplementary Fig. 33 suggests that the  
1448 prior number of shifts specified in BAMM does not dramatically affect the estimated number of  
1449 rate shifts in the posterior prediction (slope = 0.1049). The average number of rate shifts among  
1450 the MSC configurations was approximately 28. Bayes factor comparisons for each analysis,  
1451 however, supported models with a number of diversification rate shifts in the upper 30s or low

1452 40s, depending on the specified priors. This was true even for analyses with prior models that  
1453 expected one rate shift in the phylogeny.

1454 In Extended Data Fig. 4, we present the MSC configuration resulting from an analysis  
1455 with a prior model that expected 15 rate shifts and ran a 2-chain MCMC simulation with a deltaT  
1456 value of 0.5. Log-likelihood values across all analyses were similar, but the analyses with prior  
1457 models assuming 15 or 40 expected shifts displayed the highest effective sample sizes (ESS) for  
1458 their log-likelihoods and for the number of shift events. Since the estimated number and  
1459 positions of the rate shifts were similar across analyses with different priors, we take note of the  
1460 19 clades with leading branches that were estimated to have undergone rate shifts by at least 16  
1461 ( $\geq 70\%$ ) of the 23 BAMM analyses. The 19 shared clades, several of which (e.g. zoarcoids,  
1462 darters, notothenioids, labrids, cichlids and gobies) have previously been described as having  
1463 undergone radiations, are labeled with blue numbers in Extended Data Fig. 4. They include: 1)  
1464 Dinematchthyidae, 2) Apogoninae (Apogonidae to the exclusion of *Pseudamia*), 3) Gobiidae  
1465 and Oxudercidae, 4) Mastacembelidae, 5) the clade defined by Scopthalmidae and Soleidae, 6)  
1466 Carangidae (to the exclusion of *Seriola*), 7) Pseudocrenilabrinae (in Cichlidae), 8) Poeciliidae, 9)  
1467 Labridae, 10) Sciaenidae, 11) Chaetodontidae, 12) Acanthuridae (to the exclusion of *Naso*), 13)  
1468 Anthiadae and Epinephelidae, 14.) darters (Etheostomatinae), 15) the clade defined by  
1469 “Nototheniidae” and Channichthyidae (see Supplementary Fig. 17 for clarification), 16) *Sebastes*,  
1470 17) the clade defined by Trichodontidae and Psychrolutidae, 18) Lycodinae (in Zoarcidae), and  
1471 19) the clade defined by Stichaeidae and Zoarcidae. We chose to present the configuration in  
1472 Extended Data Fig. 4 because the analysis assuming 40 rate shifts had more rate shifts beyond  
1473 these 19 clades than the analysis assuming 15 expected rate shifts. Still, the MSC configuration  
1474 presented in Extended Data Fig. 4 highlights eight additional rate shifts that are labelled with  
1475 black numbers and are not present in this list of 19. Furthermore, while the MSC configuration in  
1476 Extended Data Fig. 4 identifies rate shifts occurring within Acanthuridae and Zoarcidae, these  
1477 shifts occur along a different-yet-nearby internal branch than in most of the other configurations.  
1478 Specifically, the configuration in Extended Data Fig. 4 flags one rate shift in the branch leading  
1479 to Acanthuridae to the exclusion of *Naso* and *Prionurus*, and another in the lineage defined by  
1480 *Bothrocara* and *Lycodes concolor* (within Zoarcidae).

1481 The fact that many of the rate shifts identified by BAMM occur along tipwards branches  
1482 may indicate that the species richness of Acanthomorpha is driven by relatively recent, more

1483 phylogenetically or geographically localized radiations instead of a burst of diversification after  
1484 the K-Pg. This pattern does not seem to be unique to acanthomorphs; numerous radiations have  
1485 shown to have a similar pattern of constant diversification across the K-Pg boundary despite  
1486 bursts in the origin of disparity in morphological and ecological traits<sup>7</sup>. Nevertheless, there is a  
1487 chance that this pattern is the by-product of analytical corrections for incomplete sampling. Such  
1488 corrections may reduce the statistical power to infer shifts in diversification rates and increase  
1489 the probability of Type II error when rate variation is present<sup>286</sup>. It is also known that Bayesian  
1490 methods of diversification rate estimation, including BAMM and TESS, penalize parameter-rich  
1491 diversification models and favor less-complex models even under liberal priors. Given the  
1492 infinite number of possible diversification scenarios that could result in the observed  
1493 phylogeny<sup>287</sup>, it is therefore possible that TESS estimated a constant-rate model to best fit our  
1494 data because of its simplicity rather than its accuracy.  
1495

## Supplementary References

- 1496  
1497  
1498 57 Longo, S. J. *et al.* Phylogenomic analysis of a rapid radiation of misfit fishes  
1499 (Syngnathiformes) using ultraconserved elements. *Mol. Phylogenet. Evol.* **113**, 33-48,  
1500 doi:<https://doi.org/10.1016/j.ympev.2017.05.002> (2017).
- 1501 58 DiBattista, J. D. *et al.* Ice ages and butterflyfishes: Phylogenomics elucidates the  
1502 ecological and evolutionary history of reef fishes in an endemism hotspot. *Ecol. & Evol.*  
1503 **8**, 10989-11008, doi:10.1002/ece3.4566 (2018).
- 1504 59 Glenn, T. C. *et al.* Adapterama I: universal stubs and primers for 384 unique dual-  
1505 indexed or 147,456 combinatorially-indexed Illumina libraries (iTru & iNext). *PeerJ* **7**,  
1506 e7755, doi:10.7717/peerj.7755 (2019).
- 1507 60 Bolger, A. M., Lohse, M. & Usadel, B. Trimmomatic: a flexible trimmer for Illumina  
1508 sequence data. *Bioinformatics* **30**, 2114-2120 (2014).
- 1509 61 Grabherr, M. G. *et al.* Full-length transcriptome assembly from RNA-Seq data without a  
1510 reference genome. *Nat Biotechnol* **29**, 644-652, doi:10.1038/nbt.1883 (2011).
- 1511 62 Capella-Gutiérrez, S., Silla-Martínez, J. M. & Gabaldón, T. trimAl: a tool for automated  
1512 alignment trimming in large-scale phylogenetic analyses. *Bioinformatics* **25**, 1972-1973,  
1513 doi:10.1093/bioinformatics/btp348 (2009).
- 1514 63 Minh, B. Q., Nguyen, M. A. T. & von Haeseler, A. Ultrafast Approximation for  
1515 Phylogenetic Bootstrap. *Mol. Biol. Evol.* **30**, 1188-1195, doi:10.1093/molbev/mst024  
1516 (2013).
- 1517 64 Kalyaanamoorthy, S., Minh, B. Q., Wong, T. K. F., von Haeseler, A. & Jermiin, L. S.  
1518 ModelFinder: fast model selection for accurate phylogenetic estimates. *Nat. Methods* **14**,  
1519 587-589 (2017).
- 1520 65 Robinson, D. F. & Foulds, L. R. Comparison of phylogenetic trees. *Math. Biosci.* **53**,  
1521 131-147 (1981).
- 1522 66 Steel, M. A. & Penny, D. Distributions of tree comparison metrics: Some new results.  
1523 *Syst. Biol.* **42**, 126-141. (1993).
- 1524 67 Oliveros, C. H. *et al.* Earth history and the passerine superradiation. *Proceedings of the*  
1525 *National Academy of Sciences* **116**, 7916, doi:10.1073/pnas.1813206116 (2019).
- 1526 68 Drummond, A. J. & Rambaut, A. BEAST: Bayesian evolutionary analysis by sampling  
1527 trees. *BMC Evol. Biol.* **7**, 214 (2007).

- 1528 69 Rabosky, D. L., Donnellan, S. C., Grundler, M. & Lovette, I. J. Analysis and  
1529 visualization of complex macroevolutionary dynamics: an example from Australian  
1530 scincid lizards. *Syst. Biol.* **63**, 610-627 (2014).
- 1531 70 Davesne, D. *et al.* Early fossils illuminate character evolution and interrelationships of  
1532 Lampridiformes (Teleostei, Acanthomorpha). *Zool. J. Linn. Soc.* **172**, 475-498 (2014).
- 1533 71 Delbarre, D. J., Davesne, D. & Friedman, M. Anatomy and relationships of *Aipichthys*  
1534 *pretiosus* and '*Aipichthys*' *nuchalis* (Acanthomorpha: Lampridomorpha), with a review of  
1535 Late Cretaceous relatives of oarfishes and their allies. *J Syst Palaeontol* **14**, 545-567  
1536 (2016).
- 1537 72 Ogg, J. G. & Hinnov, L. A. in *The Geologic Time Scale 2012* Vol. 2 (eds F. Gradstein, J.  
1538 Ogg, M.D. Schmitz, & G.M. Ogg) 793-853 (Elsevier, 2012).
- 1539 73 Patterson, C. A review of Mesozoic acanthopterygian fishes, with special reference to  
1540 those of the English Chalk. *Phil. Trans. R. Soc. B* **247**, 213-482 (1964).
- 1541 74 Owen, E. in *Fossils of the Chalk. Palaeontological Association Field Guides to Fossils:*  
1542 *Number 2* (ed A.B. Smith) 9-14 (Oxford University Press, 1987).
- 1543 75 Friedman, M., Beckett, H. T., Close, R. A. & Johanson, Z. The English Chalk and  
1544 London Clay: two remarkable British bony fish & Lagerstätten. *Geological Society, London, Special Publications* **430**, 165, doi:10.1144/SP430.18 (2016).
- 1545 76 Rosen, D. E. & Patterson, C. The structure and relationships of the paracanthopterygian  
1547 fishes. *Bull. Amer. Mus. Nat. Hist.* **141**, 357-474 (1969).
- 1548 77 Murray, A. M. & Wilson, M. V. H. in *Mesozoic fishes 2 - systematics and fossil record*  
1549 (eds G. Arratia & H.-P. Schultze) 397-411 (Verlag Dr. Friedrich Pfeil, 1999).
- 1550 78 Armbruster, J. W., Niemiller, M. L. & Hart, P. B. Morphological evolution of the Cave-,  
1551 Spring-, and Swampfishes of the Amblyopsidae (Percopsiformes). *Copeia* **104**, 763-777,  
1552 doi:10.1643/CI-15-339 (2016).
- 1553 79 Evanoff, E., McIntosh, W. C. & Murphey, P. C. Stratigraphic summary and <sup>40</sup>Ar/<sup>39</sup>Ar  
1554 geochronology of the Florissant Formation, Colorado. *Proc. Denver Mus. Nature Sci.*  
1555 **Series 4, no. 1**, 1-16 (2001).
- 1556 80 Danil'chenko, P. G. Kostistye ryby Maikopskikh otlozhenii Kavkaza [Bony fishes of the  
1557 Maikop deposits of the Caucasus]. *Trudy Paleon. Inst.* **78**, 1-208. [In Russian] (1960).

- 1558 81 Baciu, D.-S., Bannikov, A. F. & Tyler, J. C. Revision of the fossil fishes of the family  
1559 Zeidae (Zeiformes). *Boll. Mus. Storia Nat. Verona, Geol. Paleon. Preist.* **29**, 95-128  
1560 (2005).
- 1561 82 Santini, F., Tyler, J. C., Bannikov, A. F. & Baciu, D. S. A phylogeny of extant and fossil  
1562 buckler dory fishes, family Zeidae (Zeiformes, Acanthomorpha). *Cybium* **30**, 99-107  
1563 (2006).
- 1564 83 Jones, R. W. & Simmons, M. D. A review of the stratigraphy of Eastern Paratethys  
1565 (Oligocene-Holocene), with particular emphasis on the Black Sea. *AAPG Mem.* **68**, 39-52  
1566 (1997).
- 1567 84 Luterbacher, H. P. *et al.* in *A geologic time scale 2004* (eds F. Gradstein, J. Ogg, & A.  
1568 Smith) 384-408 (Cambridge University Press, 2004).
- 1569 85 Danil'chenko, P. G. in *Ocherki po filogenii i sistematike iskopayemykh ryb i*  
1570 *beschelyustnykh [Outlines on the phylogeny and systematics of fossil fishes and*  
1571 *agnathans]* (ed D.V. Obruchev) 113-156. [In Russian] (Nauka, 1968).
- 1572 86 Bannikov, A. F. Review of fossil Lampridiformes (Teleostei) finds with a description of a  
1573 new Lophotidae genus and species from the Oligocene of the northern Caucasus.  
1574 *Paleontol. J.* **33**, 68-76 (1999).
- 1575 87 Bannikov, A. F. & Parin, N. N. The list of marine fishes from Cenozoic (Upper  
1576 Paleocene-middle Miocene) localities in southern European Russia and adjacent  
1577 countries. *J. Ichthyol.* **37**, 150-155 (1997).
- 1578 88 Patterson, C. New Cretaceous berycoid fishes from the Lebanon. *Bull. Brit. Mus. (Nat.*  
1579 *Hist.) Geol.* **14**, 69-109 (1967).
- 1580 89 Zehren, S. J. The comparative osteology and phylogeny of the Beryciformes.  
1581 *Evolutionary Monogr.* **1**, 1-389 (1979).
- 1582 90 Sorbini, L. Gli Holocentridae di Monte Bolca. I: *Eoholocentrum*, nov. gen.,  
1583 *Eoholocentrum macrocephalum* (de Blainville) (Pisces-Actinopterygii). *Stud. Ric.*  
1584 *Giaciam. Terz. Bolca* **2**, 205-228 (1975).
- 1585 91 Sorbini, L. Gli Holocentridae di Monte Bolca. II: *Tenuicentrum pattersoni* nov. gen. nov.  
1586 sp. Nuovi dati a favore dell'origine monofiletica dei beryciformi (Pisces). *Stud. Ric.*  
1587 *Giaciam. Terz. Bolca* **2**, 456-472 (1975).

- 1588 92 Sorbini, L. Gli Holocentridae di Monte Bolca. III. *Berybolcensis leptacanthus* (Agassiz).  
1589 *Stud. Ric. Giaciam. Terz. Bolca* **4**, 19-35 (1979).
- 1590 93 Stewart, J. D. *Taxonomy, paleoecology, and stratigraphy of the halecostome-inoceramid*  
1591 *associations of the North American Upper Cretaceous epicontinental seaway*, University  
1592 of Kansas, (1984).
- 1593 94 Papazzoni, C., Carnevale, G., Fornaciari, E., Giusberti, L. & Trevisani, E. 29-36  
1594 (2014).
- 1595 95 Papazzoni, C. A. & Trevisani, E. Facies analysis, palaeoenvironmental reconstruction,  
1596 and biostratigraphy of the “Pesciara di Bolca” (Verona, northern Italy): An early Eocene  
1597 *Fossil-Lagerstätte*. *Palaeogeogr. Palaeoclimat. Palaecol.* **242**, 21-35 (2006).
- 1598 96 Sorbini, L. The Cretaceous fishes of Nardò. I°. Order Gasterosteiformes (Pisces). *Boll.*  
1599 *Mus. Civ. Stor. Nat. Verona* **8**, 1-27 (1981).
- 1600 97 Orr, J. W. *Phylogenetic relationships of gasterosteiform fishes (Teleostei:*  
1601 *Acanthomorpha)*, University of Washington, (1995).
- 1602 98 Pietsch, T. W. Evolutionary relationships of the sea moths (Teleostei: Pegasidae) with a  
1603 classification of the gasterosteiform families. *Copeia* **1978**, 517-529 (1978).
- 1604 99 Medizza, F. & Sorbini, L. in *I vertebrati fossili italiani—Catalogo dell Mostra* 131-134  
1605 (Museo Civico di Storia Naturale, 1980).
- 1606 100 Blot, J. La faune ichthyologique des gisements du Monte Bolca (Province de Vérone,  
1607 Italie). Catalogue systématique présentat l'état actuel des recherches concernant cette  
1608 faune. *Bull. Mus. nation. d'Hist. nat., Paris, 4e serie, sec. C* **2**, 339-396 (1980).
- 1609 101 Doiuchi, R. & Nakabo, T. Molecular phylogeny of the stromateoid fishes (Teleostei :  
1610 Perciformes) inferred from mitochondrial DNA sequences and compared with  
1611 morphology-based hypotheses. *Mol. Phylogenet. Evol.* **39**, 111-123 (2006).
- 1612 102 Carnevale, G. & Bannikov, A. F. Description of a new stromateoid fish from the Miocene  
1613 of St. Eugene, Algeria. *Acta Palaeontol Pol* **51**, 489-497 (2006).
- 1614 103 Horn, M. H. Systematic Status and Aspects of the Ecology of the Elongate Ariommid  
1615 Fishes (Suborder Stromateoidei) in the Atlantic. *Bull. Mar. Sci.* **22**, 537-558 (1972).
- 1616 104 Bannikov, A. F. An new species of stromateoid fishes (Perciformes) the Lower  
1617 Oligocene of the Caucasus. *Paleontol. J.* **22**, 107-112 (1988).

- 1618 105 Bannikov, A. Morphology and phylogeny of fossil stromateoid fishes (Perciformes).  
1619 *Geobios* **28**, Supplement 2, 177-181 (1995).
- 1620 106 Doiuchi, R., Sato, T. & Nakabo, T. Phylogenetic relationships of the stromateoid fishes  
1621 (Perciformes). *Ichthyol. Res.* **51**, 202-212 (2004).
- 1622 107 Carnevale, G. Fossil fishes from the Serravallian (Middle Miocene) of Torricella Peligna,  
1623 Italy. *Palaeontographia Italica* **91**, 1-67 (2007).
- 1624 108 Santini, F., Carnevale, G. & Sorenson, L. First molecular scombrid timetree  
1625 (Percomorpha: Scombridae) shows recent radiation of tunas following invasion of pelagic  
1626 habitat. *Ital. J. Zool.* **80**, 210-221, doi:Doi 10.1080/11250003.2013.775366 (2013).
- 1627 109 Arambourg, C. Resultats scientifiques de la mission C. Arambourg en Syrie et en Iran  
1628 (1938–1939). II. Les poissons Oligocène de l’Iran. *Notes Mém. Moyen-Orient* **8**, 1-210  
1629 (1967).
- 1630 110 Matsui, T. Review of mackerel genera *Scomber* and *Rastrelliger* with description of a  
1631 new species of *Rastrelliger*. *Copeia* **1967**, 71-83 (1967).
- 1632 111 Monsch, K. A. Revision of the scombroid fishes from the Cenozoic of England. *T Roy*  
1633 *Soc Edin-Earth* **95**, 445-489 (2005).
- 1634 112 Monsch, K. A. The PhyloCode, or alternative nomenclature: Why it is not beneficial to  
1635 palaeontology, either. *Acta Palaeontol Pol* **51**, 521-524 (2006).
- 1636 113 Collette, B. B. & Russo, J. L. Morphology, systematics, and biology of the Spanish  
1637 Mackerels (*Scomberomorus*, Scombridae). *Fish. Bull.* **82**, 545-692 (1984).
- 1638 114 Leriche, M. Les poissons éocènes de la Belgique. *Memoirs of the Royal Belgian Museum*  
1639 *of Natural Sciences* **3**, 49-228 (1905).
- 1640 115 Monsch, K. A. & Bannikov, A. F. New taxonomic synopses and revision of the  
1641 scombroid fishes (Scombroidei, Perciformes), including billfishes, from the Cenozoic of  
1642 territories of the former USSR. *Earth Env Sci T R So* **102**, 253-300, doi:Doi  
1643 10.1017/S1755691011010085 (2011).
- 1644 116 Bannikov, A. F. Fossil scombrids of the USSR. *Trudy Paleon. Inst.* **210**, 1-111 (1985).
- 1645 117 Murray, A. M. & Thewissen, J. G. M. Eocene actinopterygian fishes from Pakistan, with  
1646 the description of a new genus and species of channid (Channiformes). *J. Vert. Paleo.* **28**,  
1647 41-52 (2008).



- 1648 118 Gingerich, P. D. Stratigraphic and micropaleontological constraints on the middle Eocene  
1649 age of the mammal-bearing Kuldana Formation of Pakistan. *J. Vert. Paleo.* **23**, 643-651,  
1650 doi:Doi 10.1671/2409 (2003).
- 1651 119 Rabosky, D. L. *et al.* An inverse latitudinal gradient in speciation rate for marine fishes.  
1652 *Nature*, doi:10.1038/s41586-018-0273-1 (2018).
- 1653 120 Bannikov, A. The systematic composition of the Eocene actinopterygian fish fauna from  
1654 Monte Bolca, northern Italy, as known to date. *St. Ric. Giac. Terz. Bolca* **15** (2014).
- 1655 121 Carnevale, G., Bannikov, A., Marramà, G., Tyler, J. C. & Zorzin, R. in *The Bolca Fossil-*  
1656 *Lagerstätten: A window into the Eocene World* (eds C. Andrea Papazzoni *et al.*) 37-63  
1657 (Rendiconti della Società Paleontologica Italiana, 2014).
- 1658 122 Johnson, G. D. Scombroid phylogeny: an alternative hypothesis. *Bull. Mar. Sci.* **39**, 1-41  
1659 (1986).
- 1660 123 Friedman, M. & Johnson, G. D. A new species of *Mene* (Perciformes: Menidae) from the  
1661 Paleocene of South America, with notes on paleoenvironment. *J. Vert. Paleo.* **25**, 770-  
1662 783 (2005).
- 1663 124 Bonde, N. A distinct fish fauna in the basal ashseries of the Fur/Ølst Formation (U.  
1664 Paleocene, Denmark). *Aarhus Geoscience* **6**, 33-48 (1997).
- 1665 125 Anthonissen, D. E. & Ogg, J. G. in *The Geologic Time Scale 2012* (eds F. Gradstein, J.  
1666 Ogg, M.D. Schmitz, & G.M. Ogg) 1083-1127 (Elsevier, 2012).
- 1667 126 Smith-Vaniz, W. F. in *Ontogeny and systematics of fishes* (eds H.G. Moser *et al.*) 522-  
1668 530 (Allen Press, 1984).
- 1669 127 Eastman, C. R. Descriptions of Bolca fishes. *Bull. Mus. Comp. Zool.* **46**, 1-36 (1904).
- 1670 128 Gushiken, S. Phylogenetic relationships of the perciform genera of the family Carangidae.  
1671 *Jap. J. Ich.* **34**, 443-461 (1988).
- 1672 129 Friedman, M., Johanson, Z., Harrington, R. C., Near, T. J. & Graham, M. R. An early  
1673 fossil remora (Echeneoidea) reveals the evolutionary assembly of the adhesion disc. *Proc.*  
1674 *R. Soc. B* **280**, 20131200, doi:10.1098/rspb.2013.1200 (2013).
- 1675 130 Micklich, N. R. New information on the fish fauna of the Frauenweiler fossil site. *Ital. J.*  
1676 *Zool.* **65**, 169-184 (1998).

- 1677 131 O'Toole, B. Phylogeny of the species of the superfamily Echeneoidea (Perciformes :  
1678 Carangoidei: Echeneidae, Rachycentridae, and Coryphaenidae), with an interpretation of  
1679 echeneid hitchhiking behaviour. *Can. J. Zool.* **80**, 596-623 (2002).
- 1680 132 Bannikov, A. F. Fossil carangids and apolectids of the USSR. *Trudy Paleon. Inst.* **244**, 1-  
1681 106 (1990).
- 1682 133 Friedman, M. The evolutionary origin of flatfish asymmetry. *Nature* **454**, 209-212 (2008).
- 1683 134 Chanet, B. A cladistic reappraisal of the fossil flatfishes record consequences on the  
1684 phylogeny of the Pleuronectiformes (Osteichthyes: Teleostei). *Ann. Sci. nat., Zool., Paris*  
1685 *13e Sér.* **18** (1997).
- 1686 135 Chanet, B. *Eubuglossus eocenicus* (Woodward 1910) from the Upper Lutetian of Egypt,  
1687 one of the oldest soleids (Teleostei, Pleuronectiformes). *Neu. Jahrbuch Geolo. Paläon.,*  
1688 *Monatshefte* **1994**, 391-398 (1994).
- 1689 136 Chapleau, F. & Keast, A. A phylogenetic reassessment of the monophyletic status of the  
1690 family Soleidae, with comments on the suborder Soleoidei (Pisces, Pleuronectiformes).  
1691 *Can. J. Zool.* **66**, 2797-2810, doi:DOI 10.1139/z88-408 (1988).
- 1692 137 Baciú, D. S. & Chanet, B. Les poissons plats fossils (Teleostei: Pleuronectiformes) de  
1693 l'Oligocène de Piatra Neamt (Roumanie). *Oryctos* **4**, 17-38 (2002).
- 1694 138 Sakamoto, K., Uyeno, T. & Micklich, N. *Oligopleuronectes germanicus* gen. et sp. nov.,  
1695 an Oligocene pleuronectid flatfish from Frauenweiler, S-Germany. *Bulletin of the*  
1696 *National Science Museum Series C (Geology & Paleontology)* **30**, 89-94 (2004).
- 1697 139 Cooper, J. A. & Chapleau, F. Phylogenetic status of *Paralichthodes algoensis*  
1698 (Pleuronectiformes: Paralichthodidae). *Copeia* **1998**, 477-481. (1998).
- 1699 140 Carnevale, G., Bannikov, A. F., Landini, W. & Sorbini, C. Volhynian (early Sarmatian  
1700 sensu lato) fishes from Tsurevsky, North Caucasus, Russia. *J. Paleontol.* **80**, 684-699,  
1701 doi:Doi 10.1666/0022-3360(2006)80[684:Vesslf]2.0.Co;2 (2006).
- 1702 141 Chanet, B. & Sorbini, C. A male fish *Bothus podas* (Delaroche, 1809)  
1703 (Pleuronectiformes: Bothidae) in the Pliocene of the Marecchia river (Italy). *Bollettino*  
1704 *della Societa Paleontologica Italiana* **40**, 345-350 (2001).
- 1705 142 Murray, A. M. Eocene cichlid fishes from Tanzania, East Africa. *J. Vert. Paleo.* **20**, 651-  
1706 664 (2000).

- 1707 143 Murray, A. M. The oldest fossil cichlids (Teleostei: Perciformes): Indication of a 45  
1708 million-year-old species flock. *Proc. R. Soc. B* **268**, 679-684. (2001).
- 1709 144 Murray, A. M. The fossil record and biogeography of the Cichlidae (Actinopterygii:  
1710 Labroidei). *Biol. J. Linn. Soc.* **74**, 517-532 (2001).
- 1711 145 Harrison, T. *et al.* in *Eocene biodiversity: Unusual occurrences and rarely sampled*  
1712 *habitats* (ed G.F. Gunnell) 39-74 (Kluwer Academic/Plenum Publishers, 2001).
- 1713 146 Benton, M. J. *et al.* Constraints on the timescale of animal evolutionary history.  
1714 *Palaeontologia Electronica* **18** (2015).
- 1715 147 Bannikov, A., Parin, N. V. & Pinna, J. *Rhamphexocoetus volans*, gen. et sp. nov. a new  
1716 beloniform fish (Beloniformes, Exocoetidei) from the lower Eocene of Italy. *J. Ichthyol.*  
1717 **25(2)**, 150-155 (1985).
- 1718 148 Rosen, D. E. The relationships and taxonomic position of the halfbeaks, killifishes,  
1719 silversides and their relatives. *Bull. Amer. Mus. Nat. Hist.* **127**, 217-268 (1964).
- 1720 149 Rosen, D. E. & Parenti, L. R. Relationships of *Oryzias* and the groups of atherinomorph  
1721 fishes. *Amer. Mus. Novit.* **2719**, 1-25 (1981).
- 1722 150 Collette, B. B., McGowen, G. E., Parin, N. V. & Mito, S. in *Ontogeny and systematics of*  
1723 *fishes* (eds H.G. Moser *et al.*) 335-354 (American Society of Ichthyologists and  
1724 Herpetologists, 1984).
- 1725 151 Bellwood, D. R. & Schultz, O. A review of the fossil record of parrotfishes (Labroidei:  
1726 Scaridae) with a description of a new *Calatomus* species from the Middle Miocene  
1727 (Badenian) of Austria. *Ann. Naturhist. Mus. Wien* **92**, 55-71 (1991).
- 1728 152 Bannikov, A. F. & Tyler, J. C. Phylogenetic revision of the fish families Luvaridae and  
1729 †Kushlukiidae (Acanthuroidei), with a new genus and two new species of Eocene  
1730 luvarids. *Smithson. Contrib. Paleobiol.* **81**, 1-45 (1995).
- 1731 153 Blot, J. & Tyler, J. C. New genera and species of fossil surgeon fishes and their relatives  
1732 (Acanthuroidei, Teleostei) from the Eocene of Monte Bolca, Italy, with application of the  
1733 Blot Formula to both fossil and recent forms. *St. Ric. Giac. Terz. Bolca* **6**, 13-92 (1990).
- 1734 154 Tyler, J. C. & Bannikov, A. F. Relationships of the fossil and recent genera of  
1735 rabbitfishes (Acanthuroidei: Siganidae). *Smithson. Contrib. Paleobiol.* **84**, 1-35 (1997).

- 1736 155 Micklich, N. R., Tyler, J. C., Johnson, G. D., Swidnicka, E. & Bannikov, A. F. First fossil  
1737 records of the tholichthys larval stage of butterfly fishes (Perciformes, Chaetodontidae),  
1738 from the Oligocene of Europe. *Palaontol. Z.* **83**, 479-497 (2009).
- 1739 156 Carnevale, G. Morphology and biology of the Miocene butterflyfish *Chaetodon ficheuri*  
1740 (Teleostei: Chaetodontidae). *Zool. J. Linn. Soc.* **146**, 251-267 (2006).
- 1741 157 Blum, S. D. *The osteology and phylogeny of the Chaetodontidae (Teleostei: Perciformes)*,  
1742 University of Hawaii, (1988).
- 1743 158 Krijgsman, W., Hilgen, F. J., Raffi, I., Sierro, F. J. & Wilson, D. S. Chronology, causes  
1744 and progression of the Messinian salinity crisis. *Nature* **400**, 652-655 (1999).
- 1745 159 Hilgen, F. J. *et al.* Extending the astronomical (polarity) time scale into the Miocene.  
1746 *Earth Planet. Sci. Lett.* **136**, 495-510 (1995).
- 1747 160 Carnevale, G. The first fossil ribbonfish (Teleostei, Lampridiformes, Trachipteridae).  
1748 *Geol. Mag.* **141**, 573-582 (2004).
- 1749 161 Yabumoto, Y. & Uyeno, T. A new Miocene ponyfish of the genus *Leiognathus* (Pisces,  
1750 Leiognathidae). *Bull. Nat. Sci. Mus., Tokyo Ser. C* **20**, 67-77 (1994).
- 1751 162 Yabumoto, Y. & Uyeno, T. *Euleiognathus*, a new genus proposed for the Miocene  
1752 ponyfish, *Leiognathus tottori* Yabumoto and Uyeno 1994 (Perciformes: Leiognathidae)  
1753 from Japan. *Ichthyol. Res.* **58**, 19-23 (2011).
- 1754 163 Chakrabarty, P. & Sparks, J. S. Diagnoses for *Leiognathus* Lacepede 1802, *Equula*  
1755 Cuvier 1815, *Equulites* Fowler 1904, *Eubleekeria* Fowler 1904, and a new ponyfish  
1756 genus (Teleostei: Leiognathidae). *Amer. Mus. Novit.*, 1-11 (2008).
- 1757 164 Yamashita, T. & Kimura, S. A new species, *Gazza squamiventralis*, from the East Coast  
1758 of Africa (Perciformes: Leiognathidae). *Ichthyol. Res.* **48**, 161-166 (2001).
- 1759 165 Sparks, J. S. & Chakrabarty, P. Description of a new genus of ponyfishes (Teleostei:  
1760 Leiognathidae), with a review of the current generic-level composition of the family.  
1761 *Zootaxa* **3947**, 181-190 (2015).
- 1762 166 Sparks, J. S., Dunlap, P. V. & Smith, W. L. Evolution and diversification of a sexually  
1763 dimorphic luminescent system in ponyfishes (Teleostei: Leiognathidae), including  
1764 diagnoses for two new genera. *Cladistics* **21**, 305-327 (2005).

- 1765 167 Gill, A. C. & Michalski, S. Osteological evidence for monophyly of the Leiognathidae  
1766 (Teleostei: Acanthomorpha: Acanthuriformes). *Zootaxa*; Vol 4732, No 3: 13 Feb.  
1767 2020DO - 10.11646/zootaxa.4732.3.4 (2020).
- 1768 168 Lourens, L., Hilgen, F., Shackleton, N. J., Laskar, J. & Wilson, D. in *A geologic time*  
1769 *scale 2004* (eds F. Gradstein, J. Ogg, & A. Smith) 409-440 (Cambridge University  
1770 Press, 2004).
- 1771 169 Santini, F. & Tyler, J. C. A phylogeny of the families of fossil and extant tetraodontiform  
1772 fishes (Acanthomorpha, Tetraodontiformes), Upper Cretaceous to recent. *Zool. J. Linn.*  
1773 *Soc.* **139**, 565-617 (2003).
- 1774 170 Bannikov, A. F. & Tyler, J. C. A new genus and species of triggerfish from the Middle  
1775 Eocene of the northern Caucasus, the earliest member of the Balistidae  
1776 (Tetraodontiformes). *Paleontol. J.* **42**, 615-620 (2008).
- 1777 171 Carnevale, G. & Pietsch, T. W. An Eocene frogfish from Monte Bolca, Italy: The earliest  
1778 known skeletal record for the family. *Palaeontology* **52**, 745-752 (2009).
- 1779 172 Pietsch, T. W. The osteology and relationships of the anglerfish genus *Tetrabrachium*  
1780 with comments on lophiiform classification. *Fish. Bull.* **79**, 387-419 (1981).
- 1781 173 Pietsch, T. W. in *Ontogeny and systematics of fishes* (eds H.G. Moser *et al.*) 320-325  
1782 (American Society of Ichthyologists and Herpetologists, 1984).
- 1783 174 Betancur-R, R. *et al.* Phylogenetic classification of bony fishes. *BMC Evol. Biol.* **17**, 162,  
1784 doi:10.1186/s12862-017-0958-3 (2017).
- 1785 175 Greenwood, P. H., Rosen, D. E., Weitzman, S. H. & Myers, G. S. Phyletic studies of  
1786 teleostean fishes, with a provisional classification of living forms. *Bull. Amer. Mus. Nat.*  
1787 *Hist.* **131**, 341-455 (1966).
- 1788 176 Nelson, J. S., Grande, T. C. & Wilson, M. V. H. *Fishes of the world*. 5th edn, (John  
1789 Wiley & Sons, Inc., 2016).
- 1790 177 Li, B. *et al.* RNF213, a new nuclear marker for acanthomorph phylogeny. *Mol.*  
1791 *Phylogenet. Evol.* **50**, 345-363 (2009).
- 1792 178 Malmström, M. *et al.* Evolution of the immune system influences speciation rates in  
1793 teleost fishes. *Nat Genet* **48**, 1204-1210, doi:10.1038/ng.3645  
1794 <http://www.nature.com/ng/journal/v48/n10/abs/ng.3645.html> - supplementary-information  
1795 (2016).

- 1796 179 Roa-Varón, A. *et al.* Confronting sources of systematic error to resolve historically  
1797 contentious relationships: a case study using gadiform fishes (Teleostei,  
1798 Paracanthopterygii, Gadiformes). *Syst. Biol.*, doi:10.1093/sysbio/syaa095 (In press).
- 1799 180 Dornburg, A. *et al.* New insights on the sister lineage of percomorph fishes with an  
1800 anchored hybrid enrichment dataset. *Mol. Phylogenet. Evol.* **110**, 27-38,  
1801 doi:<https://doi.org/10.1016/j.ympev.2017.02.017> (2017).
- 1802 181 Fricke, R., Eschmeyer, W. N. & Fong, J. D. *Eschmeyer's Catalog of Fishes: species by*  
1803 *family/subfamily*,  
1804 <<http://researcharchive.calacademy.org/research/ichthyology/catalog/SpeciesByFamily.a>  
1805 sp> (2021).
- 1806 182 Gill, F., Donsker, D. & Rasmussen, P. *IOC World Bird List (v10.2)*, (2020).
- 1807 183 Burgin, C. J., Colella, J. P., Kahn, P. L. & Upham, N. S. How many species of mammals  
1808 are there? *J. Mammal.* **99**, 1-14, doi:10.1093/jmammal/gyx147 (2018).
- 1809 184 Uetz, P., Freed, P. & Hošek, J. *The Reptile Database*, <http://www.reptile-database.org>  
1810 *accessed December 2020*, (2020).
- 1811 185 Jordan, D. S. A classification of fishes including families and genera as far as known.  
1812 *Stanford U. Publ. Univ. Ser. Biol. Sci.* **3**, 77-243 (1923).
- 1813 186 Nelson, J. S. *Fishes of the world, 4th edition*. (John Wiley, 2006).
- 1814 187 Smith, W. L. & Craig, M. T. Casting the percomorph net widely: the importance of broad  
1815 taxonomic sampling in the search for the placement of serranid and percid fishes. *Copeia*  
1816 **2007**, 35-55 (2007).
- 1817 188 Nelson, G. in *The hierarchy of life: molecules and morphology in phylogenetic analysis*  
1818 (eds B. Fernholm, K. Bremer, & H. Jörnvall) 325-336 (Elsevier, 1989).
- 1819 189 Møller, P. R., Knudsen, S. W., Schwarzahns, W. & Nielsen, J. G. A new classification of  
1820 viviparous brotulas (Bythitidae) – with family status for Dinematchthyidae – based on  
1821 molecular, morphological and fossil data. *Mol. Phylogenet. Evol.* **100**, 391-408,  
1822 doi:<http://dx.doi.org/10.1016/j.ympev.2016.04.008> (2016).
- 1823 190 Campbell, M. A. *et al.* Evolutionary affinities of the unfathomable Parabrotulidae:  
1824 molecular data indicate placement of *Parabrotula* within the family Bythitidae,  
1825 Ophidiiformes. *Mol. Phylogenet. Evol.* **109**, 337-342,  
1826 doi:<https://doi.org/10.1016/j.ympev.2017.02.004> (2017).

- 1827 191 Evseenko, S. A., Gordeeva, N. V., Bolshakova, Y. Y. & Kobylansky, S. H. Morphology  
1828 and molecular phylogenetic relationships of *Barathronus multidentis* (Ophidiiformes:  
1829 Bythitidae). *Cybium: international journal of ichthyology* **42**, 137-141 (2018).
- 1830 192 Miya, M., Satoh, T. R. & Nishida, M. The phylogenetic position of toadfishes (order  
1831 Batrachoidiformes) in the higher ray-finned fish as inferred from partitioned Bayesian  
1832 analysis of 102 whole mitochondrial genome sequences. *Biol. J. Linn. Soc.* **85**, 289-306  
1833 (2005).
- 1834 193 Smith, W. L. & Wheeler, W. C. Venom evolution widespread in fishes: a phylogenetic  
1835 road map for the bioprospecting of piscine venoms. *J. Hered.* **97**, 206-217 (2006).
- 1836 194 Thacker, C. E. Phylogeny of Gobioidae and placement within Acanthomorpha, with a  
1837 new classification and investigation of diversification and character evolution. *Copeia*  
1838 **2009**, 93-104 (2009).
- 1839 195 Chakrabarty, P., Davis, M. P. & Sparks, J. S. The first record of a trans-oceanic sister-  
1840 group relationship between obligate vertebrate troglobites. *Plos One* **7** (2012).
- 1841 196 Kuang, T. *et al.* Phylogenomic analysis on the exceptionally diverse fish clade Gobioidae  
1842 (Actinopterygii: Gobiiformes) and data-filtering based on molecular clocklikeness. *Mol.*  
1843 *Phylogenet. Evol.* **128**, 192-202, doi:<https://doi.org/10.1016/j.ympev.2018.07.018> (2018).
- 1844 197 McCraney, W. T., Thacker, C. E. & Alfaro, M. E. Supermatrix phylogeny resolves goby  
1845 lineages and reveals unstable root of Gobiaria. *Mol. Phylogenet. Evol.* **151**, 106862,  
1846 doi:<https://doi.org/10.1016/j.ympev.2020.106862> (2020).
- 1847 198 Thacker, C. E. *et al.* Molecular phylogeny of Percomorpha resolves *Trichonotus* as the  
1848 sister lineage to Gobioidae (Teleostei: Gobiiformes) and confirms the polyphyly of  
1849 Trachinoidei. *Mol. Phylogenet. Evol.* **93**, 172-179,  
1850 doi:<https://doi.org/10.1016/j.ympev.2015.08.001> (2015).
- 1851 199 Orrell, T. M., Collette, B. B. & Johnson, G. D. Molecular data support separate  
1852 scombroid and xiphioid clades. *Bull. Mar. Sci.* **79**, 505-519 (2006).
- 1853 200 Song, H. Y. *et al.* Mitogenomic circumscription of a novel percomorph fish clade mainly  
1854 comprising "Syngnathoidae" (Teleostei). *Gene* **542**, 146-155,  
1855 doi:[10.1016/j.gene.2014.03.040](https://doi.org/10.1016/j.gene.2014.03.040) (2014).
- 1856 201 Gosline, W. A. A reinterpretation of the teleostean fish order Gobiesociformes. *Proc.*  
1857 *California Acad. Sci.* **38**, 363-381 (1970).

- 1858 202 Nelson, J. S. *Fishes of the world, 3rd edition*. 3rd edn, (Wiley, 1994).
- 1859 203 Springer, V. G. & Johnson, G. D. Study of the dorsal gill-arch musculature of teleostome  
1860 fishes, with special reference to the Actinopterygii. *Bull. Biol. Soc. Wash.* **11**, 1-260  
1861 (2004).
- 1862 204 Wiley, E. O. & Johnson, G. D. in *Origin and phylogenetic interrelationships of teleosts*  
1863 (eds J.S. Nelson, H.-P. Schultze, & M.V.H. Wilson) 123-182 (Verlag Dr. Friedrich Pfeil,  
1864 2010).
- 1865 205 Johnson, G. D. Percomorph phylogeny: progress and problems. *Bull. Mar. Sci.* **52**, 3-28  
1866 (1993).
- 1867 206 Kim, B.-J. Comparative anatomy and phylogeny of the family Mullidae (Teleostei:  
1868 Perciformes). *Memoirs of the Graduate School of Fisheries Sciences, Hokkaido*  
1869 *University* **49**, 1-74 (2002).
- 1870 207 Parenti, L. R. Relationships of atherinomorph fishes (Teleostei). *Bull. Mar. Sci.* **52**, 170-  
1871 196. (1993).
- 1872 208 Reznick, D. N., Furness, A. I., Meredith, R. W. & Springer, M. S. The origin and  
1873 biogeographic diversification of fishes in the family Poeciliidae. *PLOS ONE* **12**,  
1874 e0172546, doi:10.1371/journal.pone.0172546 (2017).
- 1875 209 Bragança, P. H. N., Amorim, P. F. & Costa, W. J. E. M. Pantanodontidae (Teleostei,  
1876 Cyprinodontiformes), the sister group to all other cyprinodontoid killifishes as inferred by  
1877 molecular data. *Zoosystematics and Evolution* **94**, 137-145 (2018).
- 1878 210 Pohl, M., Milvertz, F., Meyer, A. & Vences, M. Multigene phylogeny of  
1879 cyprinodontiform fishes suggests continental radiations and a rogue taxon position of  
1880 Pantanodon. *Vertebrate Zoology* **65**, 37-44 (2015).
- 1881 211 Parenti, L. R. A phylogenetic and biogeographic analysis of cyprinodontiform fishes  
1882 (Teleostei: Atherinomorpha). *Bull. Amer. Mus. Nat. Hist.* **168**, 335-557 (1981).
- 1883 212 Costa, W. J. E. M. in *Phylogeny and classification of Neotropical fishes* (eds L.R.  
1884 Malabarba *et al.*) 537-560 (EDIPUCRS, 1998).
- 1885 213 Lovejoy, N. R. Reinterpreting recapitulation: Systematics of needlefishes and their allies  
1886 (Teleostei : Beloniformes). *Evolution* **54**, 1349-1362 (2000).
- 1887 214 Lovejoy, N. R., Iranpour, M. & Collette, B. B. Phylogeny and jaw ontogeny of  
1888 beloniform fishes. *Integ. Comp. Biol.* **44**, 366-377, doi:Doi 10.1093/Icb/44.5.366 (2004).



- 1889 215 Dasilao, J. C. & Sasaki, K. Phylogeny of the flyingfish family Exocoetidae (Teleostei,  
1890 Beloniformes). *Ichthyol. Res.* **45**, 347-353, doi:10.1007/BF02725187 (1998).
- 1891 216 Bloom, D. D., Unmack, P. J., Gosztonyi, A. E., Piller, K. R. & Lovejoy, N. R. It's a  
1892 family matter: molecular phylogenetics of Atheriniformes and the polyphyly of the surf  
1893 silversides (Family: Notocheiridae). *Mol. Phylogenet. Evol.* **62**, 1025-1030 (2012).
- 1894 217 Campanella, D. *et al.* Multi-locus fossil-calibrated phylogeny of Atheriniformes  
1895 (Teleostei, Ovalentaria). *Mol. Phylogenet. Evol.* **86**, 8-23,  
1896 doi:<https://doi.org/10.1016/j.ympev.2015.03.001> (2015).
- 1897 218 Dyer, B. S. & Chernoff, B. Phylogenetic relationships among atheriniform fishes  
1898 (Teleostei: Atherinomorpha). *Zool. J. Linn. Soc.* **117**, 1-69 (1996).
- 1899 219 Liem, K. F. & Greenwood, P. H. A functional-approach to the phylogeny of the  
1900 pharyngognath teleosts. *Am. Zool.* **21**, 83-101 (1981).
- 1901 220 Kaufman, L. & Liem, K. F. Fishes of the suborder Labroidei (Pisces: Perciformes):  
1902 phylogeny, ecology, and evolutionary significance. *Breviora* **472**, 1-19 (1982).
- 1903 221 Springer, V. G. & Orrell, T. M. Appendix: phylogenetic analysis of 147 families of  
1904 acanthomorph fishes based primarily on dorsal gill-arch muscles and skeleton. - In:  
1905 Springer, V.G. & Johnson, G.D. Study of the dorsal gill-arch musculature of teleostome  
1906 fishes, with special reference to the Actinopterygii. *Bull. Biol. Soc. Wash.* **11**, 236-260  
1907 (2004).
- 1908 222 Rosen, D. E. & Patterson, C. On Müller's and Cuvier's concepts of pharyngognath and  
1909 labyrinth fishes and the classification of percomorph fishes, with an atlas of percomorph  
1910 dorsal gill arches. *Amer. Mus. Novit.* **2983**, 1-57 (1990).
- 1911 223 Collins, R. A., Britz, R. & Rüber, L. Phylogenetic systematics of leaffishes (Teleostei:  
1912 Polycentridae, Nandidae). *J. Zool. Syst. Evol. Res.* **53**, 259-272, doi:10.1111/jzs.12103  
1913 (2015).
- 1914 224 Lundberg, J. G. in *Biological Relationships between Africa and South America* (ed P.  
1915 Goldblatt) 156-199 (Yale University Press, 1993).
- 1916 225 Lavoué, S. Origins of Afrotropical freshwater fishes. *Zool. J. Linn. Soc.* **188**, 345-411,  
1917 doi:10.1093/zoolinnean/zlz039 (2020).
- 1918 226 Stiassny, M. L. J. What are grey mullets? *Bull. Mar. Sci.* **52**, 197-219. (1993).

- 1919 227 Stiassny, M. L. J. Notes on the anatomy and relationships of the bedotiid fishes of  
1920 Madagascar, with a taxonomic revision of the genus *Rheocles* (Atherinomorpha:  
1921 Bedotiidae). *Amer. Mus. Novit.* **2979**, 1-33 (1990).
- 1922 228 Lin, H. C. & Hastings, P. A. Phylogeny and biogeography of a shallow water fish clade  
1923 (Teleostei: Blenniiformes). *BMC Evol. Biol.* **13**, doi:Unsp 210  
1924 Doi 10.1186/1471-2148-13-210 (2013).
- 1925 229 Kawahara, R. *et al.* Interrelationships of the 11 gasterosteiform families (sticklebacks,  
1926 pipefishes, and their relatives): a new perspective based on whole mitogenome sequences  
1927 from 75 higher teleosts. *Mol. Phylogenet. Evol.* **46**, 224-236 (2008).
- 1928 230 Mabuchi, K., Miya, M., Azuma, Y. & Nishida, M. Independent evolution of the  
1929 specialized pharyngeal jaw apparatus in cichlid and labrid fishes. *BMC Evol. Biol.* **7**, -  
1930 (2007).
- 1931 231 Britz, R. & Johnson, G. D. "Paradox Lost": Skeletal ontogeny of *Indostomus paradoxus*  
1932 and its significance for the phylogenetic relationships of Indostomidae (Teleostei,  
1933 Gasterosteiformes). *Amer. Mus. Novit.* **3383**, 1-43 (2002).
- 1934 232 Travers, R. A. A review of the Mastacembeloidei, a suborder of synbranchiform teleost  
1935 fishes. Part II: Phylogenetic analysis. *Bull. Br. Mus. Nat. Hist. (Zool.)* **47**, 83-150 (1984).
- 1936 233 Gosline, W. A. The suborders of perciform fishes. *Proc. U.S. Nat. Mus.* **124**, 1-78 (1968).
- 1937 234 Datovo, A., de Pinna, M. C. C. & Johnson, G. D. The infrabranhial musculature and Its  
1938 bearing on the phylogeny of percomorph fishes (Osteichthyes: Teleostei). *Plos One* **9**,  
1939 e110129, doi:10.1371/journal.pone.0112600 (2014).
- 1940 235 Li, C. H., Ricardo, B. R., Smith, W. L. & Ortí, G. Monophyly and interrelationships of  
1941 snook and barramundi (Centropomidae *sensu* Greenwood) and five new markers for fish  
1942 phylogenetics. *Mol. Phylogenet. Evol.* **60**, 463-471 (2011).
- 1943 236 Sanciangco, M. D., Carpenter, K. E. & Betancur-R, R. Phylogenetic placement of  
1944 enigmatic percomorph families (Teleostei: Percomorphaceae). *Mol. Phylogenet. Evol.* **94**,  
1945 **Part B**, 565-576, doi:http://dx.doi.org/10.1016/j.ympev.2015.10.006 (2016).
- 1946 237 Girard, M. G., Davis, M. P. & Smith, W. L. The phylogeny of carangiform fishes:  
1947 morphological and genomic investigations of a new fish clade. *Copeia* **108**, 265-298,  
1948 doi:10.1643/CI-19-320 (2020).

- 1949 238 Chen, W.-J., Bonillo, C. & Lecointre, G. Repeatability of clades as a criterion of  
1950 reliability: a case study for molecular phylogeny of Acanthomorpha (Teleostei) with  
1951 larger number of taxa. *Mol. Phylogenet. Evol.* **26**, 262-288 (2003).
- 1952 239 Dettai, A. & Lecointre, G. In search of notothenioid (Teleostei) relatives. *Antarctic Sci.*  
1953 **16**, 71-85 (2004).
- 1954 240 Matschiner, M., Hanel, R. & Salzburger, W. On the origin and trigger of the notothenioid  
1955 adaptive radiation. *Plos One* **6**, e18911 (2011).
- 1956 241 Lautredou, A.-C. *et al.* New nuclear markers and exploration of the relationships among  
1957 Serraniformes (Acanthomorpha, Teleostei): the importance of working at multiple scales.  
1958 *Mol. Phylogenet. Evol.* **67**, 140-155 (2013).
- 1959 242 Johnson, G. D. *Niphon spinosus*: A primitive epinepheline serranid, with comments on  
1960 the monophyly and intrarelationships of the Serranidae. *Copeia*, 777-787 (1983).
- 1961 243 Johnson, G. D. *Niphon spinosus*, a primitive epinepheline serranid: corroborative  
1962 evidence from the larvae. *Jap. J. Ich.* **35**, 7-18 (1988).
- 1963 244 Johnson, G. D. in *Ontogeny and systematics of fishes* (eds H.G. Moser *et al.*) 464-498  
1964 (American Society of Ichthyologists and Herpetologists, 1984).
- 1965 245 Near, T. J. *et al.* Identification of the notothenioid sister lineage illuminates the  
1966 biogeographic history of an Antarctic adaptive radiation. *BMC Evol. Biol.* **15**, 109,  
1967 doi:10.1186/s12862-015-0362-9 (2015).
- 1968 246 Smith, W. L., Elizabeth, E. & Clara, R. Phylogeny and taxonomy of flatheads,  
1969 scorpionfishes, sea robins, and stonefishes (Percomorpha: Scorpaeniformes) and the  
1970 evolution of the lachrymal saber. *Copeia* **106**, 94-119, doi:10.1643/CG-17-669 (2018).
- 1971 247 Clardy, T. R. *Phylogenetic systematics of the prickleback family Stichaeidae*  
1972 *(Cottiformes: Zoarcidae) using morphological data* Ph.D. thesis, The College of William  
1973 & Mary, (2014).
- 1974 248 Kwun, H. J. & Kim, J.-K. Molecular phylogeny and new classification of the genera  
1975 *Eulophias* and *Zoarchias* (PISCES, Zoarcoidei). *Mol. Phylogenet. Evol.* **69**, 787-795,  
1976 doi:https://doi.org/10.1016/j.ympev.2013.06.025 (2013).
- 1977 249 Radchenko, O. A. The system of the suborder Zoarcoidei (Pisces, Perciformes) as  
1978 inferred from molecular genetic data. *Russian Journal of Genetics* **51**, 1096-1112,  
1979 doi:10.1134/S1022795415100130 (2015).

- 1980 250 Near, T. J. *et al.* Nuclear gene-inferred phylogenies resolve the relationships of the  
1981 enigmatic Pygmy Sunfishes, *Elassoma* (Teleostei: Percomorpha). *Mol. Phylogenet. Evol.*  
1982 **63**, 388-395, doi:10.1016/j.ympev.2012.01.011 (2012).
- 1983 251 Chen, W.-J., Lavoué, S., Beheregaray, L. B. & Mayden, R. L. Historical biogeography of  
1984 a new antitropical clade of temperate freshwater fishes. *J. Biogeogr.* **41**, 1806-1818,  
1985 doi:10.1111/jbi.12333 (2014).
- 1986 252 Greenwood, P. H. A revised familial classification for certain cirrhitoid genera (Teleostei,  
1987 Percoidei Cirrhitioidea), with comments on the group's monophyly and taxonomic ranking.  
1988 *Bull. Nat. Hist. Mus. Lond. (Zool.)* **61**, 1-10 (1995).
- 1989 253 Burridge, C. P. & Smolenski, A. J. Molecular phylogeny of the Cheilodactylidae and  
1990 Latridae (Perciformes: Cirrhitioidea) with notes on taxonomy and biogeography. *Mol.*  
1991 *Phylogenet. Evol.* **30**, 118-127 (2004).
- 1992 254 Kimura, K., Imamura, H. & Kawai, T. Comparative morphology and phylogenetic  
1993 systematics of the families Cheilodactylidae and Latridae (Perciformes: Cirrhitioidea), and  
1994 proposal of a new classification. *Zootaxa* **4536**, doi:10.11646/zootaxa.4536.1.1 (2018).
- 1995 255 Ludt, W. B., Burridge, C. P. & Chakrabarty, P. A taxonomic revision of Cheilodactylidae  
1996 and Latridae (Centrarchiformes: Cirrhitioidei) using morphological and genomic  
1997 characters. *Zootaxa* **4585**, doi:10.11646/zootaxa.4585.1.7 (2019).
- 1998 256 McDowall, R. M. Relationships and taxonomy of the New Zealand torrent fish,  
1999 *Cheimarrichthys fosteri* Haast (Pisces: Mugiloididae). *Journal of the Royal Soc NZ* **3**,  
2000 199-217 (1973).
- 2001 257 Pietsch, T. W. Phylogenetic relationships of trachinoid fishes of the family  
2002 Uranoscopidae. *Copeia* **1989**, 253-303 (1989).
- 2003 258 Pietsch, T. W. & Zabatien, C. P. Osteology and interrelationships of the sand lances  
2004 (Teleostei: Ammodytidae). *Copeia* **1990**, 78-100 (1990).
- 2005 259 Imamura, H. & Matsuura, K. Redefinition and phylogenetic relationships of the family  
2006 Pinguipedidae (Teleostei : Perciformes). *Ichthyol. Res.* **50**, 259-269 (2003).
- 2007 260 McDowall, R. M. Biogeography of the New Zealand torrentfish, *Cheimarrichthys fosteri*  
2008 (Teleostei : Pinguipedidae): a distribution driven mostly by ecology and behaviour. *Envir.*  
2009 *Biol. Fishes* **58**, 119-131 (2000).

- 2010 261 Last, P. R. in *FAO species identification guide for fishery purposes: The living marine*  
2011 *resources of the Western Central Pacific, Volume 6. Bony fishes part 4 (Labridae to*  
2012 *Latimeriidae)* (eds K.E. Carpenter & V.H. Niem) 3517 (FAO, 2001).
- 2013 262 Davis, M. P., Sparks, J. S. & Smith, W. L. Repeated and widespread evolution of  
2014 bioluminescence in marine fishes. *PLoS ONE* **11**, e0155154,  
2015 doi:10.1371/journal.pone.0155154 (2016).
- 2016 263 Prokofiev, A. M. Osteology and some other morphological characters of *Howella*  
2017 *sherborni*, with a discussion of the systematic position of the genus (Perciformes,  
2018 Percoidei). *J. Ichthyol.* **47**, 413-426 (2007).
- 2019 264 Patterson, C. & Rosen, D. E. in *Papers on the systematics of gadiform fishes* Vol. 32  
2020 *Natural History Museum of Los Angeles County Science Series* (ed D.M. Cohen) 5-36  
2021 (Natural History Museum of Los Angeles County, 1989).
- 2022 265 Chanet, B. *et al.* Evidence for a close phylogenetic relationship between the teleost orders  
2023 Tetraodontiformes and Lophiiformes based on an analysis of soft anatomy. *Cybium* **37**,  
2024 179-198 (2013).
- 2025 266 Baldwin, C. C. The phylogenetic significance of colour patterns in marine teleost larvae.  
2026 *Zool. J. Linn. Soc.* **168**, 496-563 (2013).
- 2027 267 Winterbottom, R. The familial phylogeny of the Tetraodontiformes (Acanthopterygii:  
2028 Pisces) as evidenced by their myology. *Smithson. Contrib. Zool.* **No. 155**, 1-201 (1974).
- 2029 268 Leis, J. M. in *Ontogeny and systematics of fishes* (eds H.G. Moser *et al.*) 459-463  
2030 (American Society of Ichthyologists and Herpetologists, 1984).
- 2031 269 Holcroft, N. I. A molecular analysis of the interrelationships of tetraodontiform fishes  
2032 (Acanthomorpha : Tetraodontiformes). *Mol. Phylogenet. Evol.* **34**, 525-544 (2005).
- 2033 270 Alfaro, M. E., Santini, F. & Brock, C. D. Do reefs drive diversification in marine  
2034 teleosts? Evidence from the pufferfish and their allies (Order Tetraodontiformes).  
2035 *Evolution* **61**, 2104-2126 (2007).
- 2036 271 Yamanoue, Y. *et al.* Phylogenetic position of tetraodontiform fishes within the higher  
2037 teleosts: Bayesian inferences based on 44 whole mitochondrial genome sequences. *Mol.*  
2038 *Phylogenet. Evol.* **45**, 89-101 (2007).

- 2039 272 Santini, F., Sorenson, L. & Alfaro, M. E. A new phylogeny of tetraodontiform fishes  
2040 (Tetraodontiformes, Acanthomorpha) based on 22 loci. *Mol. Phylogenet. Evol.* **69**, 177-  
2041 187, doi:Doi 10.1016/J.Ympev.2013.05.014 (2013).
- 2042 273 Arcila, D., Pyron, R. A., Tyler, J. C., Orti, G. & Betancur-R, R. An evaluation of fossil  
2043 tip-dating versus node-age calibrations in tetraodontiform fishes (Teleostei:  
2044 Percomorphaceae). *Mol. Phylogenet. Evol.* **82**, 131-145 (2015).
- 2045 274 Arcila, D. & Tyler, J. C. Mass extinction in tetraodontiform fishes linked to the  
2046 Palaeocene-Eocene thermal maximum. *Proc. R. Soc. B* **284** (2017).
- 2047 275 Miya, M. *et al.* Evolutionary history of anglerfishes (Teleostei: Lophiiformes): a  
2048 mitogenomic perspective. *BMC Evol. Biol.* **10** (2010).
- 2049 276 Pietsch, T. W. & Orr, J. W. Phylogenetic relationships of deep-sea anglerfishes of the  
2050 suborder Ceratioidei (Teleostei: Lophiiformes) based on morphology. *Copeia* **2007**, 1-34  
2051 (2007).
- 2052 277 Derouen, V., Ludt, W. B., Ho, H.-C. & Chakrabarty, P. Examining evolutionary  
2053 relationships and shifts in depth preferences in batfishes (Lophiiformes: Ogcocephalidae).  
2054 *Mol. Phylogenet. Evol.* **84**, 27-33, doi:<https://doi.org/10.1016/j.ympev.2014.12.011>  
2055 (2015).
- 2056 278 Swann, J. B., Holland, S. J., Petersen, M., Pietsch, T. W. & Boehm, T. The  
2057 immunogenetics of sexual parasitism. *Science* **369**, 1608, doi:10.1126/science.aaz9445  
2058 (2020).
- 2059 279 Pietsch, T. W. *Oceanic anglerfishes extraordinary diversity in the deep sea*. (University  
2060 of California Press, 2009).
- 2061 280 de la Estrella, M., Forest, F., Wieringa, J. J., Fougère-Danezan, M. & Bruneau, A.  
2062 Insights on the evolutionary origin of Detarioideae, a clade of ecologically dominant  
2063 tropical African trees. *New Phytologist* **214**, 1722-1735,  
2064 doi:<https://doi.org/10.1111/nph.14523> (2017).
- 2065 281 Thomson, R. C., Spinks, P. Q. & Shaffer, H. B. A global phylogeny of turtles reveals a  
2066 burst of climate-associated diversification on continental margins. *Proceedings of the  
2067 National Academy of Sciences* **118**, e2012215118, doi:10.1073/pnas.2012215118 (2021).

- 2068 282 Condamine, F. L., Nel, A., Grandcolas, P. & Legendre, F. Fossil and phylogenetic  
2069 analyses reveal recurrent periods of diversification and extinction in dictyopteran insects.  
2070 *Cladistics* **36**, 394-412, doi:<https://doi.org/10.1111/cla.12412> (2020).
- 2071 283 May, M. R., Höhna, S. & Moore, B. R. A Bayesian approach for detecting the impact of  
2072 mass-extinction events on molecular phylogenies when rates of lineage diversification  
2073 may vary. *Methods Ecol Evol* **7**, 947-959, doi:<https://doi.org/10.1111/2041-210X.12563>  
2074 (2016).
- 2075 284 Moore, B. R., Höhna, S., May, M. R., Rannala, B. & Huelsenbeck, J. P. Critically  
2076 evaluating the theory and performance of Bayesian analysis of macroevolutionary  
2077 mixtures. *Proceedings of the National Academy of Sciences* **113**, 9569-9574 (2016).
- 2078 285 Rabosky, D. L., Mitchell, J. S. & Chang, J. Is BAMM Flawed? Theoretical and Practical  
2079 Concerns in the Analysis of Multi-Rate Diversification Models. *Syst. Biol.* **66**, 477-498  
2080 (2017).
- 2081 286 Chang, J., Rabosky, D. L. & Alfaro, M. E. Estimating Diversification Rates on  
2082 Incompletely Sampled Phylogenies: Theoretical Concerns and Practical Solutions. *Syst.*  
2083 *Biol.* **69**, 602-611, doi:[10.1093/sysbio/syz081](https://doi.org/10.1093/sysbio/syz081) (2020).
- 2084 287 Louca, S. & Pennell, M. W. Extant timetrees are consistent with a myriad of  
2085 diversification histories. *Nature* **580**, 502-505, doi:[10.1038/s41586-020-2176-1](https://doi.org/10.1038/s41586-020-2176-1) (2020).

086 **Supplementary Table 1: Binomial names and higher taxonomic classification of species included in the**  
 087 **phylogeny, institutional voucher information for specimens (if applicable), and NCBI SRA BioSample**  
 088 **accession numbers.** The sixth column (‘Morphology Analyses’) denotes whether species were included in the  
 089 body shape analyses, and the seventh column (‘Concordance Analyses’) denotes if samples were included in the  
 090 BUCKy concordance factor analyses. NCBI BioSample numbers denoted with an asterisk (\*) indicate samples  
 091 for which UCE data were extracted from whole genome sequence data.

| Order            | Higher Taxa (Family or Genus) | Species Name                      | Voucher ID     | NCBI BioSample | Morphology Analyses | Concordance Analyses |
|------------------|-------------------------------|-----------------------------------|----------------|----------------|---------------------|----------------------|
| Aulopiformes     | Alepisauridae                 | <i>Alepisaurus ferox</i>          | YPM ICH 25657  | SAMN05915027   | ✓                   |                      |
| Aulopiformes     | Paralepididae                 | <i>Notolepis coatsi</i>           | YPM ICH 022576 |                | ✓                   |                      |
| Myctophiformes   | Myctophidae                   | <i>Benthoosema glaciale</i>       | See NCBI SRA   | SAMEA4028768*  | ✓                   |                      |
| Myctophiformes   | Myctophidae                   | <i>Ceratoscopelus warmingii</i>   | SIO 0510-09-28 | SAMN05915048   | ✓                   |                      |
| Myctophiformes   | Myctophidae                   | <i>Dasyscopelus selenops</i>      | YPM ICH 25697  |                | ✓                   | ✓                    |
| Myctophiformes   | Myctophidae                   | <i>Notoscopelus caudispinosus</i> | YPM ICH 028430 |                | ✓                   |                      |
| Myctophiformes   | Neoscopelidae                 | <i>Neoscopelus macrolepidotus</i> | ASIZP 0913636  |                | ✓                   |                      |
| Myctophiformes   | Neoscopelidae                 | <i>Neoscopelus microchir</i>      | ASIZO 0910701  |                | ✓                   | ✓                    |
| Myctophiformes   | Neoscopelidae                 | <i>Scopelengys tristis</i>        | UW 115136      |                | ✓                   |                      |
| Lampriformes     | <i>Lampris</i>                | <i>Lampris guttatus</i>           | SIO 04-195     | SAMN05915079   | ✓                   | ✓                    |
| Lampriformes     | Regalecidae                   | <i>Regalecus glesne</i>           | YPM ICH 26237  | SAMN05915116   |                     |                      |
| Lampriformes     | Trachipteridae                | <i>Zu elongatus</i>               | P.042029/TS3   | SAMN05915140   | ✓                   | ✓                    |
| Polymixiiformes  | <i>Polymixia</i>              | <i>Polymixia lowei</i>            | YPM ICH 025498 | SAMN05915104   | ✓                   | ✓                    |
| Percopsiformes   |                               | <i>Aphredoderus sayanus</i>       | YPM ICH 25183  | SAMN05915031   | ✓                   | ✓                    |
| Percopsiformes   | Amblyopsidae                  | <i>Typhlichthys subterraneus</i>  | See NCBI SRA   | SAMEA4028771*  | ✓                   |                      |
| Percopsiformes   | Percopsidae                   | <i>Percopsis omiscomycus</i>      | YPM ICH 017307 | SAMN05915097   |                     | ✓                    |
| Percopsiformes   | Percopsidae                   | <i>Percopsis transmontana</i>     | See NCBI SRA   | SAMEA4028770*  |                     |                      |
| Zeiformes        | Parazenidae                   | <i>Cyttopsis rosea</i>            | See NCBI SRA   | SAMEA4028773*  | ✓                   | ✓                    |
| Zeiformes        | Zeidae                        | <i>Zenopsis conchifera</i>        | MCZ 155779     | SAMN05915138   | ✓                   |                      |
| Zeiformes        | Zeidae                        | <i>Zeus faber</i>                 | NSMT 62233     | SAMN05915139   | ✓                   | ✓                    |
| Stylephoriformes |                               | <i>Stylephorus chordatus</i>      | YPM ICH 25672  | SAMN05915127   | ✓                   | ✓                    |
| Gadiformes       | <i>Bregmaceros</i>            | <i>Bregmaceros cantori</i>        | See NCBI SRA   | SAMEA4028775*  | ✓                   | ✓                    |
| Gadiformes       | <i>Melanonus</i>              | <i>Melanonus zugmayeri</i>        | See NCBI SRA   | SAMEA4028779*  | ✓                   |                      |
| Gadiformes       | Muraenolepididae              | <i>marmoratus</i>                 | See NCBI SRA   | SAMEA4028780*  |                     |                      |
| Gadiformes       | Trachyrincidae                | <i>Trachyrincus murrayi</i>       | See NCBI SRA   | SAMEA4028782*  |                     |                      |
| Gadiformes       | Trachyrincidae                | <i>Trachyrincus scabrurus</i>     | See NCBI SRA   | SAMEA4028781*  |                     |                      |
| Gadiformes       | Moridae                       | <i>Laemonema laureysi</i>         | See NCBI SRA   | SAMEA4028784*  | ✓                   |                      |
| Gadiformes       | Moridae                       | <i>Mora moro</i>                  | See NCBI SRA   | SAMEA4028783*  | ✓                   |                      |



|                    |                     |                                                      |                                          |                                  |   |   |
|--------------------|---------------------|------------------------------------------------------|------------------------------------------|----------------------------------|---|---|
| Gadiformes         | Macrouridae         | <i>Bathygadus melanobranchus</i>                     | See NCBI SRA                             | SAMEA4028785*                    | ✓ |   |
| Gadiformes         | Macrouridae         | <i>Coryphaenoides rupestris</i>                      | YPM ICH 025367                           | SAMN05915057                     | ✓ |   |
| Gadiformes         | Macrouridae         | <i>Coryphaenoides rupestris</i>                      | See NCBI SRA                             | SAMN08010939*                    |   |   |
| Gadiformes         | Macrouridae         | <i>Macrourus berglax</i>                             | See NCBI SRA                             | SAMEA4028786*                    | ✓ |   |
| Gadiformes         | Macrouridae         | <i>Malacocephalus occidentalis</i>                   | See NCBI SRA                             | SAMEA4028787*                    | ✓ |   |
| Gadiformes         | Merlucciidae        | <i>Merluccius capensis</i>                           | See NCBI SRA                             | SAMEA4028778*                    |   |   |
| Gadiformes         | Merlucciidae        | <i>Merluccius merluccius</i>                         | See NCBI SRA                             | SAMEA4028777*                    | ✓ |   |
| Gadiformes         | Phycidae            | <i>Lotella phycis</i>                                | See NCBI SRA                             | SAMEA4028789*                    |   |   |
| Gadiformes         | Phycidae            | <i>Phycis blennoides</i>                             | See NCBI SRA                             | SAMEA4028788*                    | ✓ |   |
| Gadiformes         |                     | <i>Lota lota</i>                                     | See NCBI SRA                             | SAMEA4028790*                    | ✓ |   |
| Gadiformes         | Lotidae             | <i>Brosme brosme</i>                                 | See NCBI SRA                             | SAMEA4028792*                    | ✓ |   |
| Gadiformes         | Lotidae             | <i>Molya molya</i>                                   | See NCBI SRA                             | SAMEA4028791*                    | ✓ |   |
| Gadiformes         | Gadidae             | <i>Arctogadus glacialis</i>                          | See NCBI SRA                             | SAMEA4028798*                    |   |   |
| Gadiformes         | Gadidae             | <i>Boreogadus saida</i>                              | See NCBI SRA                             | SAMEA4028799*                    | ✓ |   |
| Gadiformes         | Gadidae             | <i>Gadiculus argenteus</i>                           | See NCBI SRA                             | SAMEA4028794*                    | ✓ |   |
| Gadiformes         | Gadidae             | <i>Gadus chalcogrammus</i>                           | See NCBI SRA                             | SAMEA4028800*                    |   |   |
| Gadiformes         | Gadidae             | <i>Gadus morhua</i>                                  | YPM ICH 020859                           | SAMN05915065                     | ✓ | ✓ |
| Gadiformes         | Gadidae             | <i>Gadus morhua Melanogrammus aeglefinus</i>         | See NCBI SRA                             | SAMEA4028801*<br>SAMEA104602249* | ✓ |   |
| Gadiformes         | Gadidae             | <i>Merlangius merlangus</i>                          | See NCBI SRA                             | SAMEA4028797*                    | ✓ |   |
| Gadiformes         | Gadidae             | <i>Pollachius virens</i>                             | See NCBI SRA                             | SAMEA4028795*                    | ✓ |   |
| Gadiformes         | Gadidae             | <i>Trisopterus minutus Diretmoides pauciradiatus</i> | See NCBI SRA                             | SAMEA4028793*                    | ✓ |   |
| Trachichthyiformes | Diretmidae          | <i>YPM ICH 028266</i>                                | YPM ICH 028266                           |                                  |   | ✓ |
| Trachichthyiformes | Diretmidae          | <i>Diretmus argenteus</i>                            | Pers. Coll.: N. Merrett, "JMS"           |                                  | ✓ |   |
| Trachichthyiformes | Anomalopidae        | <i>Anomalops katoptron</i>                           | YPM ICH 020676                           |                                  |   |   |
| Trachichthyiformes | Monocentridae       | <i>Monocentris japonica</i>                          | ORIUT 1183                               |                                  | ✓ |   |
| Trachichthyiformes | <i>Anoplogaster</i> | <i>Anoplogaster cornuta</i>                          | YPM ICH 025640                           | SAMN05915028                     | ✓ | ✓ |
| Trachichthyiformes | Trachichthyidae     | <i>Aulotrachichthys prosthemi</i>                    | ASIZD 0910678                            |                                  |   |   |
| Trachichthyiformes | Trachichthyidae     | <i>Hoplostethus occidentalis</i>                     | YFTC 14563, n.v.                         |                                  | ✓ |   |
| Trachichthyiformes | Trachichthyidae     | <i>Paratrachichthys sajademalensis</i>               | YFTC 14534, n.v.                         |                                  |   |   |
| Beryciformes       | Holocentridae       | <i>Holocentrus rufus</i>                             | See NCBI SRA                             | SAMEA4028806*                    | ✓ | ✓ |
| Beryciformes       | Holocentridae       | <i>Myripristis jacobus</i>                           | See NCBI SRA                             | SAMEA4028805*                    | ✓ |   |
| Beryciformes       | Holocentridae       | <i>Myripristis leiognathus</i>                       | Pers. Coll.:<br>M.Alfaro, Alfaro<br>875  | SAMN05915086                     | ✓ |   |
| Beryciformes       | Holocentridae       | <i>Myripristis violacea</i>                          | Pers. Coll.:<br>P.Wainwright,<br>PW2260B | SAMN05915087                     | ✓ | ✓ |
| Beryciformes       | Holocentridae       | <i>Neoniphon sammara</i>                             | See NCBI SRA                             | SAMEA4028807*                    | ✓ |   |

|               |                   |                                      |                  |               |   |   |
|---------------|-------------------|--------------------------------------|------------------|---------------|---|---|
| Beryciformes  | Holocentridae     | <i>Sargocentron coruscum</i>         | YPM ICH 23957    | SAMN05915119  | ✓ |   |
| Beryciformes  | Berycidae         | <i>Beryx decadactylus</i>            | YFTC 13731, n.v. |               |   | ✓ |
| Beryciformes  | Berycidae         | <i>Beryx splendens</i>               | See NCBI SRA     | SAMEA4028808* | ✓ |   |
| Beryciformes  | Berycidae         | <i>Centroberyx druzhinini</i>        | ASIZD 0911026    |               | ✓ |   |
| Beryciformes  | Melamphaidae      | <i>Melamphaes longivelis</i>         | YPM ICH 028501   |               | ✓ |   |
| Beryciformes  | Melamphaidae      | <i>Poromitra gibbsi</i>              | YPM ICH 028486   |               | ✓ |   |
| Beryciformes  | Melamphaidae      | <i>Scopelogadus beanii</i>           | YPM ICH 028434   |               | ✓ |   |
| Beryciformes  | <i>Rondeletia</i> | <i>Rondeletia bicolor</i>            | YPM ICH 027515   |               | ✓ |   |
| Beryciformes  | <i>Rondeletia</i> | <i>Rondeletia loricata</i>           | YPM ICH 25674    | SAMN05915117  | ✓ |   |
| Beryciformes  | Cetomimidae       | <i>Ataxolepis apus</i>               | YPM ICH 025531   |               |   |   |
| Beryciformes  | Cetomimidae       | <i>Cetostoma regani</i>              | YPM ICH 028287   |               | ✓ |   |
| Beryciformes  | Cetomimidae       | <i>Ditropichthys storeri</i>         | YPM ICH 028280   |               | ✓ |   |
| Beryciformes  | Cetomimidae       | <i>Mirapinna esau</i>                | YFTC 26026, n.v. |               |   |   |
| Beryciformes  |                   | <i>Barbourisia rufa</i>              | YPM ICH 010068   |               | ✓ | ✓ |
| Beryciformes  | Stephanoberycidae | <i>Acanthochaenus luetkenii</i>      | YFTC 24122, n.v. |               | ✓ |   |
| Beryciformes  | Stephanoberycidae | <i>Acanthochaenus luetkenii</i>      | YFTC 24124, n.v. |               |   |   |
| Beryciformes  | Stephanoberycidae | <i>Malacosarcus macrostoma</i>       | USNM 400019      |               |   |   |
| Ophidiiformes | Dinematichthyidae | <i>Diancistrus jeffjohnsoni</i>      | YFTC 32439, n.v. |               | ✓ |   |
| Ophidiiformes | Dinematichthyidae | <i>Dinematichthys iluocoeteoides</i> | USNM 334123      |               |   | ✓ |
| Ophidiiformes | Dinematichthyidae | <i>Diancistrus tongaensis</i>        | USNM 374200      |               | ✓ |   |
| Ophidiiformes | Dinematichthyidae | <i>Ogilbia cayorum</i>               | ZMUC P771463     |               |   |   |
| Ophidiiformes | Dinematichthyidae | <i>Ogilbichthys</i> sp.              | USNM 349073      |               |   |   |
| Ophidiiformes | Dinematichthyidae | <i>Typhliasina pearsei</i>           | ZMUC P771455     |               |   |   |
| Ophidiiformes | Bythitidae        | <i>Aphyonus gelatinosus</i>          | ZMUB/MAR 3880    |               |   |   |
| Ophidiiformes | Bythitidae        | <i>Bidenichthys capensis</i>         | KU 6466          |               |   |   |
| Ophidiiformes | Bythitidae        | <i>Brosmophyciops pautzkei</i>       | SAIAB 86260      |               |   |   |
| Ophidiiformes | Bythitidae        | <i>Cataetyx messieri</i>             | ZMUC P771617     |               | ✓ |   |
| Ophidiiformes | Bythitidae        | <i>Diplacanthopoma brachysoma</i>    | MCZ 155341       |               |   |   |
| Ophidiiformes | Bythitidae        | <i>Megacataetyx niki</i>             | NMNZ P.41257     |               |   |   |
| Ophidiiformes | Bythitidae        | <i>Parabrotula tanseimaru</i>        | CBM 10557        | SAMN18716611* |   |   |
| Ophidiiformes | Ophidiidae        | <i>Acanthonus armatus</i>            | MNHN 2004-1311   |               |   |   |
| Ophidiiformes | Ophidiidae        | <i>Apagesoma australe</i>            | ZMUC P771525     |               |   |   |
| Ophidiiformes | Ophidiidae        | <i>Bassogigas walkeri</i>            | SIO 08-109       |               |   | ✓ |
| Ophidiiformes | Ophidiidae        | <i>Brotula barbata</i>               | See NCBI SRA     | SAMEA4028811* | ✓ |   |
| Ophidiiformes | Ophidiidae        | <i>Carapus acus</i>                  | See NCBI SRA     | SAMEA4028813* |   |   |
| Ophidiiformes | Ophidiidae        | <i>Carapus bermudensis</i>           | KU 18739         | SAMN05915045  |   |   |
| Ophidiiformes | Ophidiidae        | <i>Chilara taylora</i>               | KU 28277         |               | ✓ |   |
| Ophidiiformes | Ophidiidae        | <i>Dannevigia tusca</i>              | YFTC 32428, n.v. |               |   |   |
| Ophidiiformes | Ophidiidae        | <i>Dicrolene intronigra</i>          | KU 3677          |               | ✓ |   |

|                   |                    |                                       |                                       |               |   |   |
|-------------------|--------------------|---------------------------------------|---------------------------------------|---------------|---|---|
| Ophidiiformes     | Ophidiidae         | <i>Holcomycteronus brucei</i>         | ZMUC P771528                          |               |   |   |
| Ophidiiformes     | Ophidiidae         | <i>Lamprogrammus exutus</i>           | See NCBI SRA                          | SAMEA4028812* | ✓ |   |
| Ophidiiformes     | Ophidiidae         | <i>Lepophidium profundorum</i>        | KU 27197                              |               | ✓ |   |
| Ophidiiformes     | Ophidiidae         | <i>Monomitopus garmani</i>            | ZMUC P771573                          |               |   |   |
| Ophidiiformes     | Ophidiidae         | <i>Porogadus miles</i>                | ZMUB/MAR 2661                         |               |   |   |
| Ophidiiformes     | Ophidiidae         | <i>Ventichthys biospeedoi</i>         | MNHN 2004-2038                        |               |   |   |
| Batrachoidiformes | Batrachoididae     | <i>Batrachoides pacifici</i>          | See NCBI SRA                          | SAMN05915038  |   |   |
| Batrachoidiformes | Batrachoididae     | <i>Chatrabus melanurus</i>            | See NCBI SRA                          | SAMEA4028814* | ✓ |   |
| Batrachoidiformes | Batrachoididae     | <i>Halobatrachus didactylus</i>       | YFTC 17238, n.v.                      |               | ✓ | ✓ |
| Batrachoidiformes | Batrachoididae     | <i>Opsanus tau</i>                    | YPM ICH 24156                         |               | ✓ | ✓ |
| Batrachoidiformes | Batrachoididae     | <i>Porichthys notatus</i>             | Pers. Coll.: P.Wainwright, PW267: B50 |               | ✓ |   |
| Gobiiformes       | <i>Kurtus</i>      | <i>Kurtus gulliveri</i>               | TMB 09-2                              | SAMN05915077  | ✓ | ✓ |
| Gobiiformes       | <i>Kurtus</i>      | <i>Kurtus indicus</i>                 | AMNH 251591                           |               |   |   |
| Gobiiformes       | Apogonidae         | <i>Astrapogon stellatus</i>           | YPM ICH 021834                        |               | ✓ |   |
| Gobiiformes       | Apogonidae         | <i>Cheilodipterus quinquelineatus</i> | Pers. Coll.: P.Wainwright, PW1704B    |               | ✓ |   |
| Gobiiformes       | Apogonidae         | <i>Fibramia lateralis</i>             | Pers. Coll.: P.Wainwright, PW2294B    | SAMN05915032  |   |   |
| Gobiiformes       | Apogonidae         | <i>Ostorhinchus doederleini</i>       | LACM 000974                           |               |   | ✓ |
| Gobiiformes       | Apogonidae         | <i>Ostorhinchus nigrofasciatus</i>    | LACM-T 000970                         | SAMN05915092  | ✓ |   |
| Gobiiformes       | Apogonidae         | <i>Paroncheilus affinis</i>           | Pers. Coll.: M. Alfaro, MEA           |               |   |   |
| Gobiiformes       | Apogonidae         | <i>Phaeoptyx pigmentaria</i>          | LACM-T 000493                         | SAMN05915099  | ✓ |   |
| Gobiiformes       | Apogonidae         | <i>Pristiapogon kallopterus</i>       | YPM ICH 026618                        |               | ✓ |   |
| Gobiiformes       | Apogonidae         | <i>Pseudamia gelatinosa</i>           | n.v.                                  |               | ✓ | ✓ |
| Gobiiformes       | Apogonidae         | <i>Taeniamia biguttata</i>            | LACM 000975                           |               |   |   |
| Gobiiformes       | <i>Trichonotus</i> | <i>Trichonotus filamentosus</i>       | LSUMZ 14120                           |               | ✓ | ✓ |
| Gobiiformes       | Rhyacichthyidae    | <i>Rhyacichthys aspro</i>             | NSMT-P 97135                          |               |   |   |
| Gobiiformes       | Odontobutidae      | <i>Odontobutis obscura</i>            | See NCBI SRA                          | SAMN05915089  | ✓ | ✓ |
| Gobiiformes       | Odontobutidae      | <i>Sineleotris saccharae</i>          | LACM-T, n.v.                          |               |   |   |
| Gobiiformes       | Milyeringidae      | <i>Milyeringa veritas</i>             | SAMA, n.v.                            |               |   |   |
| Gobiiformes       | Milyeringidae      | <i>Typhleotris madagascariensis</i>   | FMNH 116498                           |               |   |   |
| Gobiiformes       | Eleotridae         | <i>Dormitator maculatus</i>           | LACM 000017                           |               | ✓ |   |
| Gobiiformes       | Eleotridae         | <i>Eleotris pisonis</i>               | LACM 000019                           |               | ✓ |   |
| Gobiiformes       | Eleotridae         | <i>Erotelis smaragdus</i>             | LACM-T 000042                         | SAMN05915063  | ✓ |   |
| Gobiiformes       | Eleotridae         | <i>Gobiomorphus hubbsi</i>            | LACM-T, n.v.                          |               | ✓ |   |
| Gobiiformes       | Eleotridae         | <i>Gobiomorus dormitor</i>            | NCSM 068278                           |               | ✓ |   |
| Gobiiformes       | Eleotridae         | <i>Guavina micropus</i>               | Pers. Coll.: VanTass/Rob              |               | ✓ |   |
| Gobiiformes       | Eleotridae         | <i>Hemieleotris latifasciata</i>      | LACM 000018                           |               | ✓ |   |
| Gobiiformes       | Eleotridae         | <i>Hypseleotris compressa</i>         | LACM 000104                           |               | ✓ |   |

|             |                     |                                      |               |               |   |
|-------------|---------------------|--------------------------------------|---------------|---------------|---|
| Gobiiformes | Eleotridae          | <i>Microphilypnus ternetzi</i>       | ANSP 180643   |               |   |
| Gobiiformes | Eleotridae          | <i>Mogurnda adspersa</i>             | LACM-T 000069 | SAMN05915085  | ✓ |
| Gobiiformes | Eleotridae          | <i>Ratsirakia legendrei</i>          | LACM 000007   |               |   |
| Gobiiformes | Eleotridae          | <i>Tateurndina ocellicauda</i>       | LACM 000066   |               | ✓ |
| Gobiiformes | Butidae             | <i>Butis butis</i>                   | LACM 000045   |               |   |
| Gobiiformes | Butidae             | <i>Kribia nana</i>                   | LACM 000077   |               | ✓ |
| Gobiiformes | Butidae             | <i>Ophiocara porocephala</i>         | LACM-T 000001 | SAMN05915091  |   |
| Gobiiformes | Butidae             | <i>Oxyeleotris lineolata</i>         | LACM-T 000021 |               | ✓ |
| Gobiiformes | Butidae             | <i>Oxyeleotris nullipora</i>         | LACM-T 000596 |               |   |
| Gobiiformes | Butidae             | <i>Oxyeleotris selheimi</i>          | LACM-T 000006 |               | ✓ |
| Gobiiformes | Thalasseleotrididae | <i>Grahamichthys radiata</i>         | YPM ICH 26585 |               | ✓ |
| Gobiiformes | Thalasseleotrididae | <i>Thalasseleotris iota</i>          | YPM ICH 26584 |               |   |
| Gobiiformes | Oxudercidae         | <i>Acanthogobius flavimanus</i>      | LACM 000295   |               | ✓ |
| Gobiiformes | Oxudercidae         | <i>Acanthogobius flavimanus</i>      | LACM-T 000295 |               |   |
| Gobiiformes | Oxudercidae         | <i>Boleophthalmus pectinirostris</i> | See NCBI SRA  | SAMN03201692* | ✓ |
| Gobiiformes | Oxudercidae         | <i>Evorthodus minutus</i>            | LACM-T 000265 | SAMN05915064  | ✓ |
| Gobiiformes | Oxudercidae         | <i>Gillichthys seta</i>              | LACM-T 000281 | SAMN05915066  | ✓ |
| Gobiiformes | Oxudercidae         | <i>Gnatholepis cauerensis</i>        | LACM 001122   |               | ✓ |
| Gobiiformes | Oxudercidae         | <i>Gobiopterus semivestitus</i>      | LACM 000090   |               |   |
| Gobiiformes | Oxudercidae         | <i>Mugilogobius rivulus</i>          | LACM 000262   |               | ✓ |
| Gobiiformes | Oxudercidae         | <i>Pandaka lidwilli</i>              | LACM 000254   |               |   |
| Gobiiformes | Oxudercidae         | <i>Periophthalmodon schlosseri</i>   | See NCBI SRA  | SAMN03201695* |   |
| Gobiiformes | Oxudercidae         | <i>Periophthalmus barbarus</i>       | LACM-T 000273 | SAMN05915098  | ✓ |
| Gobiiformes | Oxudercidae         | <i>Periophthalmus magnuspinnatus</i> | See NCBI SRA  | SAMN03201694* |   |
| Gobiiformes | Oxudercidae         | <i>Scartelaos histophorus</i>        | See NCBI SRA  | SAMN03201693* | ✓ |
| Gobiiformes | Oxudercidae         | <i>Typhlogobius californiensis</i>   | LACM 000025   |               | ✓ |
| Gobiiformes | Gobiidae            | <i>Amblyeleotris guttata</i>         | LACM 001025   |               | ✓ |
| Gobiiformes | Gobiidae            | <i>Amblygobius phalaena</i>          | LACM 000195   |               | ✓ |
| Gobiiformes | Gobiidae            | <i>Asterropteryx ensifera</i>        | LACM 001050   |               | ✓ |
| Gobiiformes | Gobiidae            | <i>Bathygobius soporator</i>         | LACM-T 000511 | SAMN05915037  | ✓ |
| Gobiiformes | Gobiidae            | <i>Bryaninops yongei</i>             | LACM 000164   |               | ✓ |
| Gobiiformes | Gobiidae            | <i>Callogobius sclateri</i>          | LACM 000172   |               | ✓ |
| Gobiiformes | Gobiidae            | <i>Coryogalops anomolus</i>          | LACM 000243   |               |   |
| Gobiiformes | Gobiidae            | <i>Coryphopterus glaucofraenum</i>   | LACM 000578   |               | ✓ |
| Gobiiformes | Gobiidae            | <i>Cryptocentrus cinctus</i>         | LACM 001086   |               | ✓ |
| Gobiiformes | Gobiidae            | <i>Elacatinus oceanops</i>           | LACM 000230   |               | ✓ |
| Gobiiformes | Gobiidae            | <i>Exyrias belissimus</i>            | LACM 000168   |               | ✓ |
| Gobiiformes | Gobiidae            | <i>Glossogobius flavipinnis</i>      | LACM 000311   |               | ✓ |

|               |                |                                   |                                          |                |   |   |
|---------------|----------------|-----------------------------------|------------------------------------------|----------------|---|---|
| Gobiiformes   | Gobiidae       | <i>Gobiodon histrio</i>           | LACM 000239                              |                | ✓ |   |
| Gobiiformes   | Gobiidae       | <i>Istigobius rigilius</i>        | LACM 001078                              |                | ✓ |   |
| Gobiiformes   | Gobiidae       | <i>Koumansetta rainfordi</i>      | n.v.                                     |                |   |   |
| Gobiiformes   | Gobiidae       | <i>Lesueurigobius sanzi</i>       | See NCBI SRA                             | SAMEA4028816*  | ✓ |   |
| Gobiiformes   | Gobiidae       | <i>Lythrypnus dalli</i>           | LACM 000190                              |                | ✓ |   |
| Gobiiformes   | Gobiidae       | <i>Microdesmus longipinnis</i>    | LACM 000617                              |                |   |   |
| Gobiiformes   | Gobiidae       | <i>Nes longus</i>                 | LACM 000222                              |                | ✓ |   |
| Gobiiformes   | Gobiidae       | <i>Priolepis cincta</i>           | LACM 000904                              |                | ✓ |   |
| Gobiiformes   | Gobiidae       | <i>Ptereleotris evides</i>        | Pers. Coll.:<br>P.Wainwright,<br>PW2064B | SAMN05915113   | ✓ | ✓ |
| Gobiiformes   | Gobiidae       | <i>Ptereleotris zebra</i>         | LACM 000594                              |                | ✓ |   |
| Gobiiformes   | Gobiidae       | <i>Stonogobiops xanthorhinica</i> | LACM 001049                              |                |   |   |
| Gobiiformes   | Gobiidae       | <i>Valenciennea strigata</i>      | LACM-T 000898                            | SAMN05915136   | ✓ |   |
| Scombriformes | <i>Arripis</i> | <i>Arripis trutta</i>             | FAKU 82391                               | SAMN13222433   | ✓ | ✓ |
| Scombriformes | <i>Ariomma</i> | <i>Ariomma bondi</i>              | YPM ICH 025637                           | SAMN13222429   | ✓ |   |
| Scombriformes | <i>Ariomma</i> | <i>Ariomma indica</i>             | NSMT 64808                               | SAMN13222430   | ✓ |   |
| Scombriformes | <i>Ariomma</i> | <i>Ariomma melana</i>             | MCZ 161902                               | SAMN13222431   | ✓ |   |
| Scombriformes | <i>Ariomma</i> | <i>Ariomma</i> sp.                | YPM ICH 027642                           | SAMN13222432   |   |   |
| Scombriformes | Nomeidae       | <i>Cubiceps whiteleggii</i>       | SNFR 14797                               | SAMN13222449   | ✓ |   |
| Scombriformes | Nomeidae       | <i>Cubiceps baxteri</i>           | SIO 98-26                                | SAMN13222448   | ✓ |   |
| Scombriformes | Nomeidae       | <i>Psenes cyanophrys</i>          | YPM ICH 025740                           | SAMN13222496   | ✓ |   |
| Scombriformes | Nomeidae       | <i>Psenes arafurensis</i>         | SNFR 14835                               | SAMN13222495   | ✓ |   |
| Scombriformes | Stromateidae   | <i>Pampus argenteus</i>           | LSUMZ 5282                               | SAMN13222483   | ✓ |   |
| Scombriformes | Stromateidae   | <i>Pampus chinensis</i>           | LSUMZ 5300                               | SAMN13222484   |   |   |
| Scombriformes | Stromateidae   | <i>Pampus echinogaster</i>        | KAUM 64926                               | SAMN13222485   |   |   |
| Scombriformes | Stromateidae   | <i>Pampus punctatissimus</i>      | CBM 12672                                |                |   |   |
| Scombriformes | Stromateidae   | <i>Peprilus burti</i>             | KU 5086                                  | SAMN13222490   | ✓ |   |
| Scombriformes | Stromateidae   | <i>Peprilus paru</i>              | KU 5169                                  | SAMN13222489   | ✓ |   |
| Scombriformes | Stromateidae   | <i>Peprilus simillimus</i>        | KU 9394                                  | SAMN13222491   | ✓ |   |
| Scombriformes | Stromateidae   | <i>Peprilus triacanthus</i>       | YPM ICH 024677                           | SAMN13222492   |   |   |
| Scombriformes |                | <i>Pomatomus saltatrix</i>        | Pers. Coll.:<br>P.Wainwright,<br>PW1568  | SAMN05915106   | ✓ |   |
| Scombriformes | Centrolophidae | <i>Hyperoglyphe antarctica</i>    | SNFR 16241                               | SAMN13222465   | ✓ |   |
| Scombriformes | Centrolophidae | <i>Hyperoglyphe japonica</i>      | CBM 13628                                | SAMN13222466   | ✓ |   |
| Scombriformes | Centrolophidae | <i>Psenopsis anomala</i>          | Miya-11-231                              | SAMN05915108   | ✓ |   |
| Scombriformes | Centrolophidae | <i>Schedophilus velaini</i>       | SNFR 16403                               | SAMN13222508   | ✓ |   |
| Scombriformes | Icosteidae     | <i>Icosteus aenigmaticus</i>      | SIO 99-95                                | SAMN13222467   | ✓ |   |
| Scombriformes |                | <i>Amarsipus carlsbergi</i>       | CBM 17750                                | SAMN10081044 * | ✓ |   |
| Scombriformes | Tetragonuridae | <i>Tetragonurus atlanticus</i>    | YPM ICH 027663                           | SAMN13222521   | ✓ |   |
| Scombriformes | Tetragonuridae | <i>Tetragonurus cuvieri</i>       | NSMT 65749                               | SAMN13222522   |   |   |

|               |                 |                                       |                                         |              |   |
|---------------|-----------------|---------------------------------------|-----------------------------------------|--------------|---|
| Scombriformes | Tetragonuridae  | <i>Tetragonurus pacificus</i>         | SNFR 15336                              | SAMN13222523 |   |
| Scombriformes | Chiasmodontidae | <i>Chiasmodon niger</i>               | YPM ICH 25663                           | SAMN05915052 | ✓ |
| Scombriformes | Chiasmodontidae | <i>Dysalotus alcocki</i>              | YPM ICH 025665                          | SAMN13222451 | ✓ |
| Scombriformes | Chiasmodontidae | <i>Dysalotus oligoscolus</i>          | YPM ICH 025654                          | SAMN13222452 |   |
| Scombriformes | Chiasmodontidae | <i>Kali kerberti</i>                  | UW 115135                               | SAMN05915076 | ✓ |
| Scombriformes | Chiasmodontidae | <i>Kali macrodon</i>                  | YPM ICH 027772                          | SAMN13222468 | ✓ |
| Scombriformes | Chiasmodontidae | <i>Kali macrura</i>                   | KU 8140                                 | SAMN13222469 |   |
| Scombriformes | Chiasmodontidae | <i>Pseudoscopelus altipinnis</i>      | YPM ICH 027632                          | SAMN13222498 |   |
| Scombriformes | Chiasmodontidae | <i>Pseudoscopelus astronesthidens</i> | KU 6518                                 | SAMN13222499 |   |
| Scombriformes | Chiasmodontidae | <i>Pseudoscopelus obtusifrons</i>     | YPM ICH 027787                          | SAMN13222501 |   |
| Scombriformes | Chiasmodontidae | <i>Pseudoscopelus odontoglossum</i>   | YPM ICH 027854                          | SAMN13222500 |   |
| Scombriformes | Chiasmodontidae | <i>Pseudoscopelus scutatus</i>        | YPM ICH 025805                          | SAMN13222503 |   |
| Scombriformes | Scombridae      | <i>Acanthocybium solandri</i>         | KU 5425                                 | SAMN13222425 | ✓ |
| Scombriformes | Scombridae      | <i>Auxis rochei</i>                   | CBM 14077                               | SAMN13222436 | ✓ |
| Scombriformes | Scombridae      | <i>Auxis thazard</i>                  | CBM 12877                               | SAMN13222437 |   |
| Scombriformes | Scombridae      | <i>Euthynnus affinis</i>              | CBM 12671                               | SAMN13222455 | ✓ |
| Scombriformes | Scombridae      | <i>Gasterochisma melampus</i>         | NSMT 93197                              | SAMN13222462 |   |
| Scombriformes | Scombridae      | <i>Gymnosarda unicolor</i>            | NSMT 62530                              | SAMN13222464 | ✓ |
| Scombriformes | Scombridae      | <i>Katsuwonus pelamis</i>             | CBM 12672                               | SAMN13222471 | ✓ |
| Scombriformes | Scombridae      | <i>Rastrelliger kanagurta</i>         | NSMT 76071                              | SAMN13222505 | ✓ |
| Scombriformes | Scombridae      | <i>Scomber australasicus</i>          | CBM 12636                               |              | ✓ |
| Scombriformes | Scombridae      | <i>Scomber japonicus</i>              | CBM 12641                               | SAMN13222509 | ✓ |
| Scombriformes | Scombridae      | <i>Scomber scombrus</i>               | YPM ICH 020681                          | SAMN05915123 | ✓ |
| Scombriformes | Scombridae      | <i>Scomberomorus maculatus</i>        | Pers. Coll.:<br>P.Wainwright,<br>PW1207 | SAMN05915124 | ✓ |
| Scombriformes | Scombridae      | <i>Scomberomorus nipponius</i>        | CBM 14469                               | SAMN13222512 |   |
| Scombriformes | Scombridae      | <i>Scomberomorus regalis</i>          | KU 30178                                |              | ✓ |
| Scombriformes | Scombridae      | <i>Thunnus orientalis</i>             | NSMT-P 93077                            |              | ✓ |
| Scombriformes | Scombridae      | <i>Thunnus tonggol</i>                | SNFR 16558                              |              |   |
| Scombriformes | Caristiidae     | <i>Caristius macropus</i>             | UW 113533                               | SAMN13222445 |   |
| Scombriformes | Caristiidae     | <i>Paracaristius maderensis</i>       | YPM ICH 027617                          | SAMN13222486 |   |
| Scombriformes | Caristiidae     | <i>Paracaristius nudarcus</i>         | YPM ICH 25618                           |              |   |
| Scombriformes | Bramidae        | <i>Brama caribbea</i>                 | YPM ICH 025808                          | SAMN13222442 | ✓ |
| Scombriformes | Bramidae        | <i>Brama dussumieri</i>               | CBM 15373                               | SAMN13222443 | ✓ |
| Scombriformes | Bramidae        | <i>Brama japonica</i>                 | SIO 01-183                              | SAMN05915040 | ✓ |
| Scombriformes | Bramidae        | <i>Eumegistus illustris</i>           | n.v. tissue only                        | SAMN13222454 |   |
| Scombriformes | Bramidae        | <i>Pterycombus brama</i>              | KU 8137                                 | SAMN13222504 | ✓ |
| Scombriformes | Bramidae        | <i>Pterycombus petersii</i>           | OCF-P 20071225                          |              | ✓ |

|                |                 |                                    |                  |              |   |
|----------------|-----------------|------------------------------------|------------------|--------------|---|
| Scobriformes   | Bramidae        | <i>Taractes asper</i>              | SIO 00-165       | SAMN05915132 |   |
| Scobriformes   | Bramidae        | <i>Taractes rubescens</i>          | CBM 14224        | SAMN13222517 |   |
| Scobriformes   | Bramidae        | <i>Taractichthys longipinnis</i>   | KU 5403          | SAMN13222518 |   |
| Scobriformes   | Bramidae        | <i>Taractichthys steindachneri</i> | CBM 14163        | SAMN13222519 | ✓ |
| Scobriformes   |                 | <i>Scombrolabrax heterolepis</i>   | NMNZ 40456       | SAMN13222514 |   |
| Scobriformes   |                 | <i>Lepidocybium flavobrunneum</i>  | CBM 12751        | SAMN13222474 |   |
| Scobriformes   | Gempylidae      | <i>Diplospinus multistriatus</i>   | YPM ICH 025671   | SAMN13222450 | ✓ |
| Scobriformes   | Gempylidae      | <i>Epinnula magistralis</i>        | NSMT 62524       | SAMN13222453 |   |
| Scobriformes   | Gempylidae      | <i>Gempylus serpens</i>            | NSMT 62526       | SAMN13222463 | ✓ |
| Scobriformes   | Gempylidae      | <i>Neoepinnula americana</i>       | KU 3543          | SAMN13222480 | ✓ |
| Scobriformes   | Gempylidae      | <i>Nesiarchus nasutus</i>          | NSMT 75668       | SAMN13222481 | ✓ |
| Scobriformes   | Gempylidae      | <i>Paradiplospinus antarcticus</i> | KU 925           | SAMN13222487 | ✓ |
| Scobriformes   | Gempylidae      | <i>Paradiplospinus gracilis</i>    | YPM ICH 022377   | SAMN13222488 |   |
| Scobriformes   | Gempylidae      | <i>Promethichthys prometheus</i>   | CBM 13627        | SAMN13222494 | ✓ |
| Scobriformes   | Gempylidae      | <i>Rexea prometheoides</i>         | OCF-P 20140707-2 | SAMN13222506 |   |
| Scobriformes   | Gempylidae      | <i>Ruvettus pretiosus</i>          | SIO 06-116       | SAMN05915118 | ✓ |
| Scobriformes   | Gempylidae      | <i>Thyrsoitoides marleyi</i>       | NSMT 73382       | SAMN13222526 |   |
| Scobriformes   | Trichiuridae    | <i>Aphanopus carbo</i>             | HUMZ 220745      | SAMN13222427 | ✓ |
| Scobriformes   | Trichiuridae    | <i>Assurger anzac</i>              | SIO 18126        | SAMN05915034 |   |
| Scobriformes   | Trichiuridae    | <i>Benthodesmus elongatus</i>      | YPM ICH 025649   | SAMN13222438 | ✓ |
| Scobriformes   | Trichiuridae    | <i>Benthodesmus simonyi</i>        | MCZ 158586       | SAMN13222439 | ✓ |
| Scobriformes   | Trichiuridae    | <i>Benthodesmus tenuis</i>         | HUMZ 220516      | SAMN13222440 |   |
| Scobriformes   | Trichiuridae    | <i>Evoxymetopon macrophthalmus</i> | SNFR 14546       | SAMN13222456 |   |
| Scobriformes   | Trichiuridae    | <i>Evoxymetopon poeyi</i>          | NSMT 77666       | SAMN13222457 |   |
| Scobriformes   | Trichiuridae    | <i>Evoxymetopon taeniatus</i>      | KU 5249          | SAMN13222458 | ✓ |
| Scobriformes   | Trichiuridae    | <i>Lepidopus altifrons</i>         | KU 3546          | SAMN13222475 | ✓ |
| Scobriformes   | Trichiuridae    | <i>Lepidopus caudatus</i>          | KU 8084          | SAMN13222476 | ✓ |
| Scobriformes   | Trichiuridae    | <i>Lepturacanthus savala</i>       | LSUMZ 78         | SAMN13222477 | ✓ |
| Scobriformes   | Trichiuridae    | <i>Tentoriceps cristatus</i>       | SNFR 17729       | SAMN13222520 | ✓ |
| Scobriformes   | Trichiuridae    | <i>Trichiurus lepturus</i>         | CBM 12994        | SAMN13222527 | ✓ |
| Scobriformes   | Trichiuridae    | <i>Trichiurus</i> sp. 1            | SNFR 17528       | SAMN13222528 |   |
| Scobriformes   | Trichiuridae    | <i>Trichiurus</i> sp. 2            | SNFR 17533       | SAMN13222529 |   |
| Sygnathiformes | Pegasidae       | <i>Eurypegasis draconis</i>        | See NCBI SRA     | SAMN06563069 |   |
| Sygnathiformes | Pegasidae       | <i>Pegasus volitans</i>            | See NCBI SRA     | SAMN06563109 | ✓ |
| Sygnathiformes | Dactylopteridae | <i>Dactyloptena orientalis</i>     | See NCBI SRA     | SAMN06563054 | ✓ |
| Sygnathiformes | Dactylopteridae | <i>Dactyloptena peterseni</i>      | See NCBI SRA     | SAMN06563055 | ✓ |
| Sygnathiformes | Dactylopteridae | <i>Dactylopterus volitans</i>      | See NCBI SRA     | SAMN06563056 | ✓ |
| Sygnathiformes | Mullidae        | <i>Mulloidichthys dentatus</i>     | See NCBI SRA     | SAMN06563097 |   |

|                |               |                                    |                                       |              |   |   |
|----------------|---------------|------------------------------------|---------------------------------------|--------------|---|---|
| Sygnathiformes | Mullidae      | <i>Mulloidichthys martinicus</i>   | See NCBI SRA                          | SAMN06563098 | ✓ |   |
| Sygnathiformes | Mullidae      | <i>Mulloidichthys vanicolensis</i> | See NCBI SRA                          | SAMN06563099 | ✓ |   |
| Sygnathiformes | Mullidae      | <i>Mullus auratus</i>              | See NCBI SRA                          |              | ✓ |   |
| Sygnathiformes | Mullidae      | <i>Parupeneus barberinoides</i>    | See NCBI SRA                          | SAMN06563103 | ✓ |   |
| Sygnathiformes | Mullidae      | <i>Parupeneus barberinus</i>       | See NCBI SRA                          |              | ✓ |   |
| Sygnathiformes | Mullidae      | <i>Parupeneus barberinus</i>       | See NCBI SRA                          | SAMN06563108 |   |   |
| Sygnathiformes | Mullidae      | <i>Parupeneus cyclostomus</i>      | See NCBI SRA                          | SAMN06563105 | ✓ |   |
| Sygnathiformes | Mullidae      | <i>Parupeneus multifasciatus</i>   | See NCBI SRA                          | SAMN06563106 | ✓ |   |
| Sygnathiformes | Mullidae      | <i>Parupeneus rubescens</i>        | See NCBI SRA                          | SAMN06563107 |   |   |
| Sygnathiformes | Mullidae      | <i>Pseudupeneus grandisquamis</i>  | See NCBI SRA                          | SAMN06563113 | ✓ | ✓ |
| Sygnathiformes | Mullidae      | <i>Pseudupeneus maculatus</i>      | See NCBI SRA                          | SAMN06563112 | ✓ |   |
| Sygnathiformes | Mullidae      | <i>Upeneichthys lineatus</i>       | See NCBI SRA                          | SAMN06563144 | ✓ |   |
| Sygnathiformes | Mullidae      | <i>Upeneus tragula</i>             | See NCBI SRA                          | SAMN06563145 | ✓ |   |
| Sygnathiformes | Draconettidae | <i>Draconetta xenica</i>           | YFTC 25957; Pers. Coll.: Eri Katayama |              |   |   |
| Sygnathiformes | Callionymidae | <i>Anaora tentaculata</i>          | See NCBI SRA                          | SAMN06563036 |   |   |
| Sygnathiformes | Callionymidae | <i>Callionymus belcheri</i>        | See NCBI SRA                          | SAMN06563039 | ✓ | ✓ |
| Sygnathiformes | Callionymidae | <i>Callionymus calcaratus</i>      | See NCBI SRA                          | SAMN06563114 |   |   |
| Sygnathiformes | Callionymidae | <i>Callionymus curvicornis</i>     | See NCBI SRA                          | SAMN06563040 | ✓ |   |
| Sygnathiformes | Callionymidae | <i>Callionymus delicatulus</i>     | See NCBI SRA                          | SAMN06563041 | ✓ |   |
| Sygnathiformes | Callionymidae | <i>Callionymus limiceps</i>        | See NCBI SRA                          | SAMN06563042 | ✓ |   |
| Sygnathiformes | Callionymidae | <i>Calliurichthys grossi</i>       | See NCBI SRA                          | SAMN06563043 |   |   |
| Sygnathiformes | Callionymidae | <i>Calliurichthys scaber</i>       | See NCBI SRA                          | SAMN06563044 |   |   |
| Sygnathiformes | Callionymidae | <i>Dactylopus dactylopus</i>       | See NCBI SRA                          | SAMN06563057 | ✓ |   |
| Sygnathiformes | Callionymidae | <i>Diplogrammus goramensis</i>     | See NCBI SRA                          | SAMN06563058 | ✓ |   |
| Sygnathiformes | Callionymidae | <i>Draculo mirabilis</i>           | See NCBI SRA                          | SAMN06563066 |   |   |
| Sygnathiformes | Callionymidae | <i>Repomucenus calcaratus</i>      | See NCBI SRA                          |              |   |   |
| Sygnathiformes | Callionymidae | <i>Synchiropus agassizii</i>       | See NCBI SRA                          | SAMN06563075 |   |   |
| Sygnathiformes | Callionymidae | <i>Synchiropus altivelis</i>       | See NCBI SRA                          | SAMN06563120 |   |   |
| Sygnathiformes | Callionymidae | <i>Synchiropus atrilabiatus</i>    | See NCBI SRA                          | SAMN06563121 | ✓ |   |
| Sygnathiformes | Callionymidae | <i>Synchiropus goodenbeani</i>     | See NCBI SRA                          |              |   |   |
| Sygnathiformes | Callionymidae | <i>Synchiropus masudai</i>         | See NCBI SRA                          | SAMN06563077 |   |   |
| Sygnathiformes | Callionymidae | <i>Synchiropus moyeri</i>          | See NCBI SRA                          | SAMN06563122 |   |   |
| Sygnathiformes | Callionymidae | <i>Synchiropus ocellatus</i>       | See NCBI SRA                          | SAMN06563123 |   |   |
| Sygnathiformes | Callionymidae | <i>Synchiropus picturatus</i>      | See NCBI SRA                          | SAMN06563124 | ✓ |   |
| Sygnathiformes | Callionymidae | <i>Synchiropus splendidus</i>      | See NCBI SRA                          | SAMN06563125 | ✓ |   |
| Sygnathiformes | Callionymidae | <i>Synchiropus stellatus</i>       | See NCBI SRA                          | SAMN06563101 | ✓ |   |
| Sygnathiformes | Centriscidae  | <i>Aeoliscus strigatus</i>         | See NCBI SRA                          | SAMN06563035 | ✓ |   |
| Sygnathiformes | Centriscidae  | <i>Centriscus scutatus</i>         | See NCBI SRA                          | SAMN06563045 |   | ✓ |



|                |                     |                                      |              |              |   |   |
|----------------|---------------------|--------------------------------------|--------------|--------------|---|---|
| Sygnathiformes | Centriscidae        | <i>Macroramphosus gracilis</i>       | See NCBI SRA | SAMN06563091 | ✓ |   |
| Sygnathiformes | Centriscidae        | <i>Macroramphosus scolopax</i>       | See NCBI SRA | SAMN06563092 | ✓ |   |
| Sygnathiformes | <i>Aulostomus</i>   | <i>Aulostomus chinensis</i>          | SAIAB 77945  |              | ✓ |   |
| Sygnathiformes | <i>Aulostomus</i>   | <i>Aulostomus maculatus</i>          | See NCBI SRA | SAMN06563038 | ✓ |   |
| Sygnathiformes | <i>Fistularia</i>   | <i>Fistularia commersonii</i>        | See NCBI SRA | SAMN06563071 | ✓ |   |
| Sygnathiformes | <i>Fistularia</i>   | <i>Fistularia corneta</i>            | See NCBI SRA | SAMN06563072 | ✓ |   |
| Sygnathiformes | <i>Fistularia</i>   | <i>Fistularia petimba</i>            | See NCBI SRA | SAMN06563073 | ✓ |   |
| Sygnathiformes | <i>Fistularia</i>   | <i>Fistularia tabacaria</i>          | See NCBI SRA | SAMN06563074 |   |   |
| Sygnathiformes | <i>Solenostomus</i> | <i>Solenostomus cyanopterus</i>      | See NCBI SRA | SAMN06563117 |   |   |
| Sygnathiformes | <i>Solenostomus</i> | <i>Solenostomus paradoxus</i>        | See NCBI SRA | SAMN06563118 |   |   |
| Sygnathiformes | Syngnathidae        | <i>Choeroichthys sculptus</i>        | See NCBI SRA | SAMN06563046 |   |   |
| Sygnathiformes | Syngnathidae        | <i>Corythoichthys amplexus</i>       | See NCBI SRA | SAMN06563047 | ✓ |   |
| Sygnathiformes | Syngnathidae        | <i>Corythoichthys haematopterus</i>  | See NCBI SRA | SAMN06563049 | ✓ |   |
| Sygnathiformes | Syngnathidae        | <i>Corythoichthys intestinalis</i>   | See NCBI SRA | SAMN06563050 | ✓ |   |
| Sygnathiformes | Syngnathidae        | <i>Corythoichthys schultzi</i>       | See NCBI SRA | SAMN06563051 | ✓ |   |
| Sygnathiformes | Syngnathidae        | <i>Cosmocampus arctus</i>            | See NCBI SRA | SAMN06563052 | ✓ |   |
| Sygnathiformes | Syngnathidae        | <i>Doryichthys boaja</i>             | See NCBI SRA | SAMN06563059 |   |   |
| Sygnathiformes | Syngnathidae        | <i>Doryichthys martensii</i>         | See NCBI SRA | SAMN06563060 |   |   |
| Sygnathiformes | Syngnathidae        | <i>Doryrhamphus excisus</i>          | See NCBI SRA | SAMN06563061 | ✓ |   |
| Sygnathiformes | Syngnathidae        | <i>Doryrhamphus janssi</i>           | See NCBI SRA | SAMN06563062 |   |   |
| Sygnathiformes | Syngnathidae        | <i>Dunckerocampus boylei</i>         | See NCBI SRA | SAMN06563064 |   |   |
| Sygnathiformes | Syngnathidae        | <i>Dunckerocampus dactyliophorus</i> | See NCBI SRA |              |   |   |
| Sygnathiformes | Syngnathidae        | <i>Enneacampus ansorgii</i>          | See NCBI SRA | SAMN06563067 |   |   |
| Sygnathiformes | Syngnathidae        | <i>Entelurus aequoreus</i>           | See NCBI SRA | SAMN06563068 | ✓ |   |
| Sygnathiformes | Syngnathidae        | <i>Festucalex wassi</i>              | See NCBI SRA | SAMN06563070 |   |   |
| Sygnathiformes | Syngnathidae        | <i>Halicampus crinitus</i>           | See NCBI SRA | SAMN06563093 | ✓ |   |
| Sygnathiformes | Syngnathidae        | <i>Halicampus dunckeri</i>           | See NCBI SRA | SAMN06563078 | ✓ |   |
| Sygnathiformes | Syngnathidae        | <i>Hippichthys penicillus</i>        | See NCBI SRA | SAMN06563079 | ✓ |   |
| Sygnathiformes | Syngnathidae        | <i>Hippocampus abdominalis</i>       | See NCBI SRA | SAMN06563080 | ✓ |   |
| Sygnathiformes | Syngnathidae        | <i>Hippocampus barbouri</i>          | See NCBI SRA |              | ✓ |   |
| Sygnathiformes | Syngnathidae        | <i>Hippocampus comes</i>             | See NCBI SRA | SAMN06563082 | ✓ | ✓ |
| Sygnathiformes | Syngnathidae        | <i>Hippocampus ingens</i>            | See NCBI SRA |              | ✓ |   |
| Sygnathiformes | Syngnathidae        | <i>Hippocampus kuda</i>              | See NCBI SRA |              | ✓ |   |
| Sygnathiformes | Syngnathidae        | <i>Hippocampus reidi</i>             | See NCBI SRA | SAMN06563087 | ✓ |   |
| Sygnathiformes | Syngnathidae        | <i>Hippocampus subelongatus</i>      | See NCBI SRA | SAMN06563088 |   |   |
| Sygnathiformes | Syngnathidae        | <i>Hypsolognathus rostratus</i>      | See NCBI SRA | SAMN06563089 |   |   |
| Sygnathiformes | Syngnathidae        | <i>Idiotropiscis lummitzeri</i>      | See NCBI SRA | SAMN06563090 |   |   |
| Sygnathiformes | Syngnathidae        | <i>Microphis brachyurus</i>          | See NCBI SRA | SAMN06563094 | ✓ |   |

|                 |                  |                                    |                                                    |              |   |
|-----------------|------------------|------------------------------------|----------------------------------------------------|--------------|---|
| Sygnathiiformes | Sygnathidae      | <i>Microphis cunocalus</i>         | See NCBI SRA                                       | SAMN06563095 |   |
| Sygnathiiformes | Sygnathidae      | <i>Microphis deocata</i>           | See NCBI SRA                                       | SAMN06563096 |   |
| Sygnathiiformes | Sygnathidae      | <i>Nerophis ophidion</i>           | See NCBI SRA                                       | SAMN06563102 | ✓ |
| Sygnathiiformes | Sygnathidae      | <i>Phycodurus eques</i>            | See NCBI SRA                                       | SAMN06563110 |   |
| Sygnathiiformes | Sygnathidae      | <i>Phyllopteryx taeniolatus</i>    | See NCBI SRA                                       | SAMN06563111 |   |
| Sygnathiiformes | Sygnathidae      | <i>Siokunichthys nigrolineatus</i> | See NCBI SRA                                       | SAMN06563116 |   |
| Sygnathiiformes | Sygnathidae      | <i>Stigmatopora nigra</i>          | See NCBI SRA                                       | SAMN06563119 |   |
| Sygnathiiformes | Sygnathidae      | <i>Stigmatopora nigra</i>          | See NCBI SRA                                       |              |   |
| Sygnathiiformes | Sygnathidae      | <i>Syngnathoides biaculeatus</i>   | See NCBI SRA                                       | SAMN06563126 | ✓ |
| Sygnathiiformes | Sygnathidae      | <i>Syngnathus abaster</i>          | See NCBI SRA                                       | SAMN06563127 | ✓ |
| Sygnathiiformes | Sygnathidae      | <i>Syngnathus acus</i>             | See NCBI SRA                                       | SAMN06563128 |   |
| Sygnathiiformes | Sygnathidae      | <i>Syngnathus auliscus</i>         | See NCBI SRA                                       | SAMN06563129 |   |
| Sygnathiiformes | Sygnathidae      | <i>Syngnathus californiensis</i>   | See NCBI SRA                                       | SAMN06563130 | ✓ |
| Sygnathiiformes | Sygnathidae      | <i>Syngnathus exilis</i>           | See NCBI SRA                                       | SAMN06563131 |   |
| Sygnathiiformes | Sygnathidae      | <i>Syngnathus floridae</i>         | See NCBI SRA                                       | SAMN06563132 | ✓ |
| Sygnathiiformes | Sygnathidae      | <i>Syngnathus fuscus</i>           | See NCBI SRA                                       | SAMN06563133 | ✓ |
| Sygnathiiformes | Sygnathidae      | <i>Syngnathus leptorhynchus</i>    | see Longo <i>et al.</i> 2017                       |              | ✓ |
| Sygnathiiformes | Sygnathidae      | <i>Syngnathus louisianae</i>       | See NCBI SRA<br>see Longo <i>et al.</i> 2017       | SAMN06563135 |   |
| Sygnathiiformes | Sygnathidae      | <i>Syngnathus pelagicus</i>        | See NCBI SRA                                       |              | ✓ |
| Sygnathiiformes | Sygnathidae      | <i>Syngnathus rostellatus</i>      | See NCBI SRA                                       | SAMN06563137 | ✓ |
| Sygnathiiformes | Sygnathidae      | <i>Syngnathus scovelli</i>         | See NCBI SRA                                       | SAMN06563138 | ✓ |
| Sygnathiiformes | Sygnathidae      | <i>Syngnathus springeri</i>        | See NCBI SRA                                       | SAMN06563139 |   |
| Sygnathiiformes | Sygnathidae      | <i>Syngnathus taenionotus</i>      | See NCBI SRA                                       | SAMN06563140 |   |
| Sygnathiiformes | Sygnathidae      | <i>Syngnathus typhle</i>           | See NCBI SRA                                       | SAMN06563141 | ✓ |
| Sygnathiiformes | Sygnathidae      | <i>Trachyrhamphus bicoarctatus</i> | See NCBI SRA                                       | SAMN06563143 | ✓ |
| Sygnathiiformes | Sygnathidae      | <i>Vanacampus phillipi</i>         | See NCBI SRA                                       | SAMN06563146 | ✓ |
| Sygnathiiformes | Sygnathidae      | <i>Vanacampus poecilolaemus</i>    | See NCBI SRA                                       | SAMN06563147 |   |
| Blenniiformes   | Adrianichthyidae | <i>Adrianichthys oophorus</i>      | USNM 38982                                         |              | ✓ |
| Blenniiformes   | Adrianichthyidae | <i>Oryzias latipes</i>             | YFTC 32445, n.v.                                   |              | ✓ |
| Blenniiformes   | Belonidae        | <i>Nomorhamphus celebensis</i>     | YPM ICH 021568<br>Pers. Coll.:<br>M.Alfaro, Alfaro |              |   |
| Blenniiformes   | Belonidae        | <i>Xenentodon cancila</i>          | 586                                                | SAMN05915137 | ✓ |
| Blenniiformes   | Belonidae        | <i>Zenarchopterus dispar</i>       | CAS 222403                                         |              |   |
| Blenniiformes   | Exocoetidae      | <i>Prognichthys occidentalis</i>   | KU 30212                                           |              | ✓ |
| Blenniiformes   | Exocoetidae      | <i>Oxyporhamphus micropterus</i>   | LACM 46125.003                                     |              | ✓ |
| Blenniiformes   | Hemiramphidae    | <i>Hyporhamphus dussumieri</i>     | KU 37091                                           |              | ✓ |
| Blenniiformes   | Hemiramphidae    | <i>Hemiramphus far</i>             | KU 6756                                            |              | ✓ |

|               |                     |                                                        |                                      |   |   |
|---------------|---------------------|--------------------------------------------------------|--------------------------------------|---|---|
| Blenniiformes | Atherinopsidae      | <i>Atherinella panamensis</i>                          | YFTC 16681, n.v.                     |   | ✓ |
| Blenniiformes | Atherinopsidae      | <i>Melanorhinus microps</i>                            | LACM T-000545                        |   |   |
| Blenniiformes | <i>Atherion</i>     | <i>Atherion elymus</i>                                 | YFTC 16683, n.v.                     |   |   |
| Blenniiformes | Phallostethidae     | <i>Neostethus bicornis</i>                             | YFTC 16684, n.v.                     | ✓ |   |
| Blenniiformes | Phallostethidae     | <i>Phenacostethus smithi</i>                           | USNM 329346                          |   |   |
| Blenniiformes | <i>Iso</i>          | <i>Iso rhotophilus</i>                                 | YFTC 16682, n.v.                     | ✓ |   |
| Blenniiformes | Atherinidae         | <i>Atherina presbyter</i><br><i>Bedotia</i>            | KU 8637                              |   |   |
| Blenniiformes | Bedotiidae          | <i>madagascariensis</i>                                | YFTC 21585, n.v. tissue whole        | ✓ |   |
| Blenniiformes | Pseudomugilidae     | <i>Pseudomugil gertrudae</i><br><i>Cairnsichthys</i>   | KU 1696                              | ✓ |   |
| Blenniiformes | Melanotaeniidae     | <i>rhombosomoides</i>                                  | YFTC 16675, n.v.                     |   |   |
| Blenniiformes | Melanotaeniidae     | <i>Iriatherina weneri</i><br><i>Austrofundulus</i>     | YPM ICH 025213                       |   | ✓ |
| Blenniiformes | Rivulidae           | <i>leohoignei</i>                                      | Pers. Coll.: Reznick Lab UCRiverside | ✓ |   |
| Blenniiformes | Rivulidae           | <i>Austrofundulus limnaeus</i>                         | See NCBI SRA SAMN03490872*           | ✓ |   |
| Blenniiformes | Rivulidae           | <i>Austrolebias nigripinnis</i>                        | Pers. Coll.: Reznick Lab UCRiverside |   | ✓ |
| Blenniiformes | Rivulidae           | <i>Kryptolebias marmoratus</i>                         | See NCBI SRA SAMN04622665*           | ✓ |   |
| Blenniiformes | Aplocheilidae       | <i>Aplocheilus lineatus</i>                            | YPM ICH 025213                       | ✓ |   |
| Blenniiformes | Aplocheilidae       | <i>Aplocheilus panchax</i>                             | YPM ICH 025220                       | ✓ |   |
| Blenniiformes | Nothobranchiidae    | <i>Aphyosemion thysi</i>                               | AMNH 258919                          | ✓ |   |
| Blenniiformes | Nothobranchiidae    | <i>Epiplatys spilargyreia</i>                          | AMNH 257025                          | ✓ | ✓ |
| Blenniiformes | Nothobranchiidae    | <i>Nothobranchius furzeri</i><br><i>Nothobranchius</i> | See NCBI SRA SAMEA2698544*           |   |   |
| Blenniiformes | Nothobranchiidae    | <i>orthonotus</i>                                      | See NCBI SRA SAMEA2698544*           |   |   |
| Blenniiformes | <i>Cubanichthys</i> | <i>Cubanichthys pengelleyi</i>                         | YFTC 16678, n.v.                     |   |   |
| Blenniiformes | Goodeidae           | <i>Goodea atripinnis</i>                               | SLU 6644                             | ✓ |   |
| Blenniiformes | Profundulidae       | <i>Tlaloc labialis</i>                                 | SLU 8114                             |   |   |
| Blenniiformes | Cyprinodontidae     | <i>Cyprinodon nevadensis</i>                           | See NCBI SRA SAMN03072616*           | ✓ |   |
| Blenniiformes | Cyprinodontidae     | <i>Cyprinodon variegatus</i>                           | See NCBI SRA SAMN02736898*           | ✓ |   |
| Blenniiformes | Cyprinodontidae     | <i>Floridichthys carpio</i>                            | KU 35360                             | ✓ |   |
| Blenniiformes | Fundulidae          | <i>Fundulus heteroclitus</i>                           | See NCBI SRA SAMN03277211*           |   |   |
| Blenniiformes | Fundulidae          | <i>Fundulus zebrinus</i>                               | YFTC 16686, n.v.                     | ✓ | ✓ |
| Blenniiformes | Fundulidae          | <i>Leptolucania ommata</i>                             | YFTC 23708, n.v.                     |   |   |
| Blenniiformes | Procatopodidae      | <i>Poropanchax normani</i>                             | YPM ICH 025212                       |   |   |
| Blenniiformes | <i>Valencia</i>     | <i>Valencia hispanica</i>                              | MNCN/ADN 63424                       | ✓ |   |
| Blenniiformes | <i>Valencia</i>     | <i>Valencia letourneuxi</i>                            | YFTC 25747, n.v.                     |   |   |
| Blenniiformes | Poeciliidae         | <i>Anableps anableps</i>                               | YPM ICH 024513                       | ✓ |   |
| Blenniiformes | Poeciliidae         | <i>Gambusia affinis</i>                                | See NCBI SRA SAMN07157452*           | ✓ | ✓ |
| Blenniiformes | Poeciliidae         | <i>Gambusia holbrooki</i>                              | MNCN/ADN 59090                       | ✓ |   |
| Blenniiformes | Poeciliidae         | <i>Poecilia latipinna</i>                              | See NCBI SRA SAMN02048973*           | ✓ |   |
| Blenniiformes | Poeciliidae         | <i>Poecilia mexicana</i>                               | See NCBI SRA SAMN02048972*           | ✓ |   |
| Blenniiformes | Poeciliidae         | <i>Poecilia reticulata</i>                             | See NCBI SRA SAMN02404645*           | ✓ |   |

|               |                      |                                          |                                       |               |   |   |
|---------------|----------------------|------------------------------------------|---------------------------------------|---------------|---|---|
| Blenniiformes | Poeciliidae          | <i>Xiphophorus couchianus</i>            | See NCBI SRA                          | SAMN03922721* | ✓ |   |
| Blenniiformes | Poeciliidae          | <i>Xiphophorus hellerii</i>              | See NCBI SRA                          | SAMN09545741* | ✓ |   |
| Blenniiformes | Polycentridae        | <i>Monocirrhus polyacanthus</i>          | Pers. Coll.: P.Wainwright, PW1656     |               | ✓ | ✓ |
| Blenniiformes | Polycentridae        | <i>Polycentrus schomburgkii</i>          | Pers. Coll.: P.Wainwright, PW1659     |               |   |   |
| Blenniiformes | <i>Pholidichthys</i> | <i>leucotaenia</i>                       | Pers. Coll.: P.Wainwright, PW1329     | SAMN05915100  | ✓ | ✓ |
| Blenniiformes | Cichlidae            | <i>Amphilophus citrinellus</i>           | See NCBI SRA                          | SAMEA2698536* | ✓ |   |
| Blenniiformes | Cichlidae            | <i>Bathybates minor</i>                  | See NCBI SRA                          | SAMN04011497  | ✓ |   |
| Blenniiformes | Cichlidae            | <i>Ectodus descampsi</i>                 | See NCBI SRA                          | SAMN04011500  |   |   |
| Blenniiformes | Cichlidae            | <i>Eretmodus cyanostictus</i>            | See NCBI SRA                          | SAMN04011501  | ✓ |   |
| Blenniiformes | Cichlidae            | <i>Haplotaxodon microlepis</i>           | See NCBI SRA                          | SAMN04011503  |   |   |
| Blenniiformes | Cichlidae            | <i>Lamprologus calipterus</i>            | See NCBI SRA                          | SAMN04011505  | ✓ |   |
| Blenniiformes | Cichlidae            | <i>Paratilapia polleni</i>               | YPM ICH 023179                        |               |   |   |
| Blenniiformes | Cichlidae            | <i>Paretroplus dambabe</i>               | YPM ICH 023180                        |               | ✓ | ✓ |
| Blenniiformes | Cichlidae            | <i>Pseudotropheus flavus</i>             | See NCBI SRA                          | SAMN04011494  |   |   |
| Blenniiformes | Cichlidae            | <i>Pterophyllum leopoldi</i>             | YPM ICH 023150                        | SAMN05915114  |   | ✓ |
| Blenniiformes | Cichlidae            | <i>Ptychochromis oligacanthus</i>        | YPM ICH 023177                        |               | ✓ |   |
| Blenniiformes | Cichlidae            | <i>Telmatochromis temporalis</i>         | See NCBI SRA                          | SAMN04011535  | ✓ |   |
| Blenniiformes | Ambassidae           | <i>Ambassis urotaenia</i>                | YPM ICH 020542                        |               | ✓ |   |
| Blenniiformes | Ambassidae           | <i>Parambassis ranga</i>                 | YFTC 1064, n.v.                       |               | ✓ | ✓ |
| Blenniiformes | Mugilidae            | <i>Crenimugil crenilabis</i>             | YPM ICH 026701                        |               |   |   |
| Blenniiformes | Mugilidae            | <i>Osteomugil engeli</i>                 | YFTC 23617, n.v.                      |               |   |   |
| Blenniiformes | Congrogadidae        | <i>Congrogadus subducens</i>             | YPM ICH 25208                         |               |   |   |
| Blenniiformes | Plesiopidae          | <i>Plesiops caeruleolineatus</i>         | YPM ICH 026606                        |               |   |   |
| Blenniiformes | Plesiopidae          | <i>Plesiops</i> sp.<br><i>Labracinus</i> | Pers. Coll.: M.Alfaro, Alfaro 13MS4   | SAMN05915101  |   |   |
| Blenniiformes | Pseudochromidae      | <i>cyclophthalmus</i>                    | Pers. Coll.: P.Wainwright, PW1689     |               |   | ✓ |
| Blenniiformes | Pseudochromidae      | <i>Pseudochromis flavivertex</i>         | CAS LR151                             | SAMN05915110  | ✓ |   |
| Blenniiformes | Pseudochromidae      | <i>Pseudochromis fuscus</i>              | See NCBI SRA                          | SAMEA4028829* | ✓ |   |
| Blenniiformes | Pseudochromidae      | <i>Pseudochromis sankeyi</i>             | CAS LR117                             | SAMN05915111  | ✓ |   |
| Blenniiformes | Pomacentridae        | <i>Acanthochromis polyacanthus</i>       | See NCBI SRA                          | SAMN06347167* | ✓ | ✓ |
| Blenniiformes | Pomacentridae        | <i>Amphiprion ocellaris</i>              | See NCBI SRA                          | SAMN07982614* | ✓ |   |
| Blenniiformes | Pomacentridae        | <i>Amphiprion percula</i>                | See NCBI SRA                          | SAMN08615572* | ✓ |   |
| Blenniiformes | Pomacentridae        | <i>Chromis chromis</i>                   | See NCBI SRA                          | SAMEA4028828* | ✓ |   |
| Blenniiformes | Pomacentridae        | <i>Chromis enchrysur</i>                 | CAS CEN01                             | SAMN05915054  | ✓ |   |
| Blenniiformes | Pomacentridae        | <i>Pomacentrus philippinus</i>           | YPM ICH 026633                        |               | ✓ |   |
| Blenniiformes | Pomacentridae        | <i>Stegastes partitus</i>                | YPM ICH 24711                         |               | ✓ |   |
| Blenniiformes | Embiotocidae         | <i>Embiotoca jacksoni</i>                | Pers. Coll.: P.Wainwright, PW227: B09 |               | ✓ | ✓ |

|                |                    |                                    |                                                  |                  |   |   |
|----------------|--------------------|------------------------------------|--------------------------------------------------|------------------|---|---|
| Blenniiformes  | Embiotocidae       | <i>Hyperprosopon ellipticus</i>    | INHS 45420                                       |                  | ✓ |   |
| Blenniiformes  | Embiotocidae       | <i>Phanerodon furcatus</i>         | Pers. Coll.: P.Wainwright, PW269: B52            |                  | ✓ |   |
| Blenniiformes  | Grammatidae        | <i>Gramma loreto</i>               | CAS GLO01                                        | SAMN05915067     | ✓ |   |
| Blenniiformes  | Opistognathidae    | <i>Opistognathus aurifrons</i>     | YPM ICH 025216                                   |                  | ✓ |   |
| Blenniiformes  | Gobiesocidae       | <i>Gobiesox maeandricus</i>        | Pers. Coll.: P.Wainwright, PW2497                |                  | ✓ | ✓ |
| Blenniiformes  | Gobiesocidae       | <i>Gouania willdenowi</i>          | See NCBI SRA                                     | * SAMEA104026382 | ✓ |   |
| Blenniiformes  | Gobiesocidae       | <i>Lepadichthys lineatus</i>       | CAS 224422                                       |                  |   |   |
| Blenniiformes  | Tripterygiidae     | <i>Enneanectes boehlkei</i>        | USNM 327602                                      |                  |   |   |
| Blenniiformes  | Tripterygiidae     | <i>Lepidonectes corallicola</i>    | SIO 02-82                                        |                  |   |   |
| Blenniiformes  | Blenniidae         | <i>Parablennius parvicornis</i>    | See NCBI SRA                                     | SAMEA4028827*    | ✓ | ✓ |
| Blenniiformes  | Blenniidae         | <i>Scartella cristata</i>          | CAS SCR01                                        | SAMN05915120     | ✓ |   |
| Blenniiformes  | Clinidae           | <i>Gibbonsia metzi</i>             | Pers. Coll.: P.Wainwright, PW221: B03            |                  | ✓ |   |
| Blenniiformes  | Clinidae           | <i>Muraenoclinus dorsalis</i>      | KU 6488                                          |                  |   |   |
| Blenniiformes  | Labrisomidae       | <i>Labrisomus nuchipinnis</i>      | CAS LNU08                                        | SAMN05915078     |   |   |
| Blenniiformes  | Chaenopsidae       | <i>Emblemariopsis</i> sp.          | CAS EMB01                                        | SAMN05915061     |   |   |
| Blenniiformes  | Dactyloscopidae    | <i>Dactyloscopus lacteus</i>       | SIO 02-88-1                                      |                  |   |   |
| Blenniiformes  | Dactyloscopidae    | <i>Gillellus semicinctus</i>       | SIO 01-167                                       |                  | ✓ |   |
| Anabantiformes | <i>Indostomus</i>  | <i>Indostomus crocodilus</i>       | YPM ICH 23894                                    |                  |   |   |
| Anabantiformes | <i>Indostomus</i>  | <i>Indostomus paradoxus</i>        | n.v. tissue whole<br>Per. Coll.:<br>W.L.Smith 22 |                  | ✓ | ✓ |
| Anabantiformes | Synbranchidae      | <i>Monopterus albus</i>            |                                                  |                  | ✓ |   |
| Anabantiformes | Synbranchidae      | <i>Ophisternon aenigmaticum</i>    | LSUMZ 16237                                      |                  |   |   |
| Anabantiformes | Synbranchidae      | <i>Ophisternon bengalense</i>      | UF 235970                                        |                  |   |   |
| Anabantiformes | Synbranchidae      | <i>Synbranchus marmoratus</i>      | KU 41318                                         |                  |   |   |
| Anabantiformes | Chaudhuriidae      | <i>Chaudhuria caudata</i>          | UF 173154                                        |                  |   |   |
| Anabantiformes | Mastacembelidae    | <i>Macrogathus aculeatus</i>       | UF 161615                                        |                  |   |   |
| Anabantiformes | Mastacembelidae    | <i>Macrogathus circumcinctus</i>   | UF 170247                                        |                  |   |   |
| Anabantiformes | Mastacembelidae    | <i>Macrogathus zebrinus</i>        | Pers. Coll.: J.Day                               |                  | ✓ |   |
| Anabantiformes | Mastacembelidae    | <i>Mastacembelus armatus</i>       | Pers. Coll.: J.Day                               |                  | ✓ |   |
| Anabantiformes | Mastacembelidae    | <i>Mastacembelus flavidus</i>      | SAIAB 79915                                      |                  |   |   |
| Anabantiformes | Mastacembelidae    | <i>Mastacembelus mastacembelus</i> | Pers. Coll.: J.Day<br>JF1390                     |                  |   |   |
| Anabantiformes | Mastacembelidae    | <i>Mastacembelus unicolor</i>      | UF 166011                                        |                  |   | ✓ |
| Anabantiformes | <i>Pristolepis</i> | <i>Pristolepis fasciata</i>        | UF 162364                                        |                  | ✓ |   |
| Anabantiformes | Badidae            | <i>Badis badis</i>                 | Pers. Coll.: J.Day                               |                  | ✓ |   |
| Anabantiformes | Badidae            | <i>Badis pyema</i>                 | YFTC 18189, n.v. tissue whole                    |                  | ✓ |   |
| Anabantiformes | Badidae            | <i>Dario dario</i>                 | YFTC 18190, n.v. tissue whole                    |                  |   |   |
| Anabantiformes | Badidae            | <i>Dario hyssginon</i>             | YFTC 20196, n.v. tissue whole                    |                  | ✓ |   |
| Anabantiformes | Nandidae           | <i>Nandus andrewi</i>              | Pers. Coll.: P.Wainwright, PW1657                |                  |   |   |
| Anabantiformes | Nandidae           | <i>Nandus nandus</i>               | Pers. Coll.: P.Wainwright, PW1663                |                  | ✓ |   |
| Anabantiformes | Nandidae           | <i>Nandus nebulosus</i>            | Pers. Coll.: P.Wainwright, PW1660                |                  | ✓ |   |

|                |               |                                   |                               |   |
|----------------|---------------|-----------------------------------|-------------------------------|---|
| Anabantiformes | Nandidae      | <i>Nandus cf. oxyrhynchus</i>     | Pers. Coll.:<br>W.L.Smith 488 | ✓ |
| Anabantiformes | Channidae     | <i>Channa andrao</i>              | Pers. Coll.: J.Day            |   |
| Anabantiformes | Channidae     | <i>Channa argus</i>               | CBM 12593                     |   |
| Anabantiformes | Channidae     | <i>Channa aurantimaculata</i>     | Pers. Coll.: J.Day            |   |
| Anabantiformes | Channidae     | <i>Channa bleheri</i>             | Pers. Coll.: J.Day            |   |
| Anabantiformes | Channidae     | <i>Channa gachua</i>              | Pers. Coll.: J.Day            | ✓ |
| Anabantiformes | Channidae     | <i>Channa lucius</i>              | UF 236121                     |   |
| Anabantiformes | Channidae     | <i>Channa marulius</i>            | UF 237264                     | ✓ |
| Anabantiformes | Channidae     | <i>Channa micropeltes</i>         | Pers. Coll.:<br>W.L.Smith 355 | ✓ |
| Anabantiformes | Channidae     | <i>Channa striata</i>             | UF 173357                     | ✓ |
| Anabantiformes | Channidae     | <i>Parachanna insignis</i>        | CUMV 96133                    |   |
| Anabantiformes | Channidae     | <i>Parachanna obscura</i>         | CUMV 96491                    |   |
| Anabantiformes |               | <i>Helostoma temminckii</i>       | Pers. Coll.:<br>W.L.Smith 36  | ✓ |
| Anabantiformes | Anabantidae   | <i>Anabas testudineus</i>         | UF 237404                     | ✓ |
| Anabantiformes | Anabantidae   | <i>Ctenopoma acutirostre</i>      | CUMV 93049                    | ✓ |
| Anabantiformes | Anabantidae   | <i>Ctenopoma gabonense</i>        | CUMV 87803                    |   |
| Anabantiformes | Anabantidae   | <i>Ctenopoma kingsleyae</i>       | CUMV 91505                    | ✓ |
| Anabantiformes | Anabantidae   | <i>Ctenopoma maculatum</i>        | CUMV 92275                    |   |
| Anabantiformes | Anabantidae   | <i>Ctenopoma multispine</i>       | CUMV 91229                    |   |
| Anabantiformes | Anabantidae   | <i>Ctenopoma muriei</i>           | CUMV 94531                    | ✓ |
| Anabantiformes | Anabantidae   | <i>Ctenopoma nigropannosum</i>    | CUMV 96662                    | ✓ |
| Anabantiformes | Anabantidae   | <i>Ctenopoma ocellatum</i>        | Pers. Coll.:<br>W.L.Smith 279 |   |
| Anabantiformes | Anabantidae   | <i>Microctenopoma ansorgii</i>    | YPM ICH 025197                | ✓ |
| Anabantiformes | Anabantidae   | <i>Microctenopoma fasciolatum</i> | YPM ICH 32030                 |   |
| Anabantiformes | Anabantidae   | <i>Microctenopoma nanum</i>       | CUMV 93021                    | ✓ |
| Anabantiformes | Anabantidae   | <i>Microctenopoma pekkolai</i>    | CUMV 94529                    |   |
| Anabantiformes | Anabantidae   | <i>Microctenopoma uelense</i>     | CUMV 91502                    |   |
| Anabantiformes | Anabantidae   | <i>Sandelia bainsii</i>           | SAIAB 199798                  |   |
| Anabantiformes | Anabantidae   | <i>Sandelia capensis</i>          | SAIAB 186085                  | ✓ |
| Anabantiformes | Anabantidae   | <i>Sandelia capensis</i>          | SAIAB 186114                  |   |
| Anabantiformes | Anabantidae   | <i>Sandelia capensis</i>          | SAIAB 186029                  |   |
| Anabantiformes | Osphronemidae | <i>Belontia hasselti</i>          | UF 165962                     | ✓ |
| Anabantiformes | Osphronemidae | <i>Betta albimarginata</i>        | Pers. Coll.: J.Day            |   |
| Anabantiformes | Osphronemidae | <i>Betta macrostoma</i>           | Pers. Coll.: J.Day            | ✓ |
| Anabantiformes | Osphronemidae | <i>Betta mandor</i>               | YPM ICH 34720                 |   |
| Anabantiformes | Osphronemidae | <i>Betta splendens</i>            | Pers. Coll.: J.Day            | ✓ |
| Anabantiformes | Osphronemidae | <i>Ctenops nobilis</i>            | YPM ICH 33735                 | ✓ |
| Anabantiformes | Osphronemidae | <i>Luciocephalus aura</i>         | UF 167012                     |   |

|                |                  |                                     |                                    |              |   |
|----------------|------------------|-------------------------------------|------------------------------------|--------------|---|
| Anabantiformes | Osphronemidae    | <i>Luciocephalus pulcher</i>        | Pers. Coll.:<br>W.L.Smith 718      |              |   |
| Anabantiformes | Osphronemidae    | <i>Macropodus ocellatus</i>         | CBM 12607                          |              |   |
| Anabantiformes | Osphronemidae    | <i>Macropodus opercularis</i>       | Pers. Coll.: J.Day<br>Pers. Coll.: |              | ✓ |
| Anabantiformes | Osphronemidae    | <i>Osphronemus goramy</i>           | W.L.Smith 536                      |              | ✓ |
| Anabantiformes | Osphronemidae    | <i>Osphronemus laticlavus</i>       | YFTC 20201, n.v.                   |              |   |
| Anabantiformes | Osphronemidae    | <i>Parasphaerichthys ocellatus</i>  | YPM ICH 32028                      |              | ✓ |
| Anabantiformes | Osphronemidae    | <i>Parosphromenus deissneri</i>     | Pers. Coll.: J.Day                 |              | ✓ |
| Anabantiformes | Osphronemidae    | <i>Parosphromenus linkei</i>        | YFTC 20193, n.v.                   |              |   |
| Anabantiformes | Osphronemidae    | <i>Pseudosphromenus cupanus</i>     | YPM ICH 33699                      |              |   |
| Anabantiformes | Osphronemidae    | <i>Sphaerichthys osphromenoides</i> | Pers. Coll.:<br>W.L.Smith 308      |              | ✓ |
| Anabantiformes | Osphronemidae    | <i>Sphaerichthys vaillanti</i>      | Pers. Coll.: J.Day                 |              |   |
| Anabantiformes | Osphronemidae    | <i>Trichogaster chuna</i>           | Pers. Coll.: J.Day                 |              |   |
| Anabantiformes | Osphronemidae    | <i>Trichogaster labiosa</i>         | YPM ICH 32029                      |              | ✓ |
| Anabantiformes | Osphronemidae    | <i>Trichogaster lalius</i>          | Pers. Coll.: J.Day                 |              | ✓ |
| Anabantiformes | Osphronemidae    | <i>Trichopodus leerii</i>           | Pers. Coll.: J.Day                 |              | ✓ |
| Anabantiformes | Osphronemidae    | <i>Trichopodus microlepis</i>       | Pers. Coll.: J.Day                 |              |   |
| Anabantiformes | Osphronemidae    | <i>Trichopodus pectoralis</i>       | YPM ICH 021566                     |              | ✓ |
| Anabantiformes | Osphronemidae    | <i>Trichopodus trichopterus</i>     | LSUMZ 13914                        |              | ✓ |
| Anabantiformes | Osphronemidae    | <i>Trichopsis pumila</i>            | n.v. tissue whole                  |              | ✓ |
| Anabantiformes | Osphronemidae    | <i>Trichopsis vittata</i>           | UF 162202                          |              | ✓ |
| Carangiformes  | Centropomidae    | <i>Lates calcarifer</i>             | NTM 92                             | SAMN05785344 | ✓ |
| Carangiformes  | Centropomidae    | <i>Centropomus ensiferus</i>        | LSUMZ 16022                        |              | ✓ |
| Carangiformes  | Centropomidae    | <i>Centropomus medius</i>           | KU 8498                            | SAMN05915046 | ✓ |
| Carangiformes  |                  | <i>Lactarius lactarius</i>          | NSMT-P 91244                       |              |   |
| Carangiformes  | <i>Sphyraena</i> | <i>Sphyraena barracuda</i>          | LSUMZ 15881                        |              | ✓ |
| Carangiformes  | <i>Sphyraena</i> | <i>Sphyraena jello</i>              | LSUMZ 17037                        |              | ✓ |
| Carangiformes  | <i>Sphyraena</i> | <i>Sphyraena pinguis</i>            | LSUMZ 17074                        |              | ✓ |
| Carangiformes  | <i>Sphyraena</i> | <i>Sphyraena putnamae</i>           | KU 6785<br>Pers. Coll.:            | SAMN05915126 | ✓ |
| Carangiformes  | <i>Sphyraena</i> | <i>Sphyraena sphyraena</i>          | W.L.Smith 499                      | SAMN05785363 |   |
| Carangiformes  | Polynemidae      | <i>Eleutheronema tetradactylum</i>  | Pers. Coll.:<br>H.Larson           | SAMN05785336 | ✓ |
| Carangiformes  | Polynemidae      | <i>Polydactylus approximans</i>     | LSUMZ 17875                        |              | ✓ |
| Carangiformes  | Polynemidae      | <i>Polydactylus sexfilis</i>        | KU 6829                            | SAMN05915103 |   |
| Carangiformes  | Polynemidae      | <i>Polynemus melanochir</i>         | LSUMZ 14165                        |              |   |
| Carangiformes  | <i>Psettodes</i> | <i>Psettodes enumeuri</i>           | LSUMZ 5295                         | SAMN05785354 | ✓ |
| Carangiformes  | Citharidae       | <i>Brachypleura novaezeelandiae</i> | LSUMZ 13790<br>Pers. Coll.:        |              |   |
| Carangiformes  | Citharidae       | <i>Citharus linguatula</i>          | W.L.Smith 596                      | SAMN05785330 |   |
| Carangiformes  | Citharidae       | <i>Citharoides macrolepis</i>       | KU 2468                            | SAMN05915055 | ✓ |

|               |                   |                                     |                               |               |   |
|---------------|-------------------|-------------------------------------|-------------------------------|---------------|---|
| Carangiformes | Achiridae         | <i>Gymnachirus melas</i>            | KU 5187                       | SAMN05785338  | ✓ |
| Carangiformes | Achiridae         | <i>Trinectes maculatus</i>          | KU 1501                       | SAMN05785371  | ✓ |
| Carangiformes | Achiropsettidae   | <i>Mancopsetta maculata</i>         | Pers. Coll.:<br>W.L.Smith 714 | SAMN05785346  |   |
| Carangiformes | Achiropsettidae   | <i>Neoachiropsetta milfordi</i>     | Pers. Coll.:<br>W.L.Smith 715 | SAMN05785350  |   |
| Carangiformes | Samaridae         | <i>Samaris cristatus</i>            | SAIAB 82287                   |               | ✓ |
| Carangiformes | Samaridae         | <i>Samariscus filipectoralis</i>    | LSUMZ 13484                   |               |   |
| Carangiformes | Samaridae         | <i>Samariscus xenicus</i>           | KU 2484                       | SAMN05785357  | ✓ |
| Carangiformes | Poecilopsettidae  | <i>Poecilopsetta natalensis</i>     | SAIAB 81888                   |               |   |
| Carangiformes | Poecilopsettidae  | <i>Poecilopsetta plinthus</i>       | KU 2473                       | SAMN05915102  | ✓ |
| Carangiformes | Poecilopsettidae  | <i>Poecilopsetta zanzibarensis</i>  | SAIAB 82402                   |               |   |
| Carangiformes | Cynoglossidae     | <i>Cynoglossus lingua</i>           | LSUMZ 17034                   |               | ✓ |
| Carangiformes | Cynoglossidae     | <i>Paraplagusia japonica</i>        | LSUMZ 17060                   |               |   |
| Carangiformes | Cynoglossidae     | <i>Symphurus plagiusa</i>           | AMNH 474                      | SAMN05785364  |   |
| Carangiformes | Soleidae          | <i>Aseraggodes xenicus</i>          | KU 5719                       | SAMN05915093  | ✓ |
| Carangiformes | Soleidae          | <i>Austroglossus pectoralis</i>     | SAIAB 200601                  |               |   |
| Carangiformes | Soleidae          | <i>Dagetichthys marginatus</i>      | SAIAB 200744                  |               |   |
| Carangiformes | Soleidae          | <i>Heteromycteris capensis</i>      | SAIAB 191581                  |               |   |
| Carangiformes | Soleidae          | <i>Solea turbynei</i>               | SAIAB 82350                   |               | ✓ |
| Carangiformes | Scophthalmidae    | <i>Scophthalmus maximus</i>         | See NCBI SRA                  | SAMN08049846* | ✓ |
| Carangiformes | Scophthalmidae    | <i>Scophthalmus rhombus</i>         | KU 5416                       | SAMN05785360  | ✓ |
| Carangiformes | Pleuronectidae    | <i>Pleuronichthys cornutus</i>      | LSUMZ 17067                   |               | ✓ |
| Carangiformes | Pleuronectidae    | <i>Pleuronichthys guttulatus</i>    | SIO 01-179                    |               |   |
| Carangiformes | Pleuronectidae    | <i>Pseudopleuronectes yokohamae</i> | LSUMZ 17053                   |               | ✓ |
| Carangiformes | Paralichthyidae   | <i>Ancylopsetta dilecta</i>         | LSUMZ 15797                   |               |   |
| Carangiformes | Paralichthyidae   | <i>Paralichthys albigutta</i>       | AMNH Uncat E172               |               | ✓ |
| Carangiformes | Paralichthyidae   | <i>Paralichthys oblongus</i>        | KU 1493                       | SAMN05915073  | ✓ |
| Carangiformes | Paralichthyidae   | <i>Pseudorhombus elevatus</i>       | LSUMZ 16603                   |               | ✓ |
| Carangiformes | Cyclosettidae     | <i>Citharichthys spilopterus</i>    | LSUMZ 15927                   |               |   |
| Carangiformes | Cyclosettidae     | <i>Cyclosetta fimbriata</i>         | KU 3985                       | SAMN05785333  | ✓ |
| Carangiformes | Cyclosettidae     | <i>Etropus cyclosquamus</i>         | KU 5241                       | SAMN05785337  | ✓ |
| Carangiformes | Cyclosettidae     | <i>Syacium gunteri</i>              | LSUMZ 15543                   |               | ✓ |
| Carangiformes | Bothidae          | <i>Bothus pantherinus</i>           | KU 5642                       | SAMN05915039  | ✓ |
| Carangiformes | Bothidae          | <i>Crossorhombus azureus</i>        | LSUMZ 14148                   |               | ✓ |
| Carangiformes | Bothidae          | <i>Crossorhombus kobensis</i>       | KU 2485                       |               |   |
| Carangiformes | Bothidae          | <i>Engyophrys senta</i>             | LSUMZ 15538                   |               |   |
| Carangiformes | Bothidae          | <i>Trichopsetta ventralis</i>       | LSUMZ 15806                   |               |   |
| Carangiformes | <i>Leptobrama</i> | <i>Leptobrama muelleri</i>          | FMNH 119722                   | SAMN05785345  | ✓ |
| Carangiformes | <i>Toxotes</i>    | <i>Toxotes blythii</i>              | YPM ICH 32036                 |               | ✓ |
| Carangiformes | <i>Toxotes</i>    | <i>Toxotes jaculatrix</i>           | YPM ICH 020543                | SAMN05915135  | ✓ |



|               |               |                                        |                                                   |              |   |
|---------------|---------------|----------------------------------------|---------------------------------------------------|--------------|---|
| Carangiformes |               | <i>Nematistius pectoralis</i>          | LSUMZ 18084                                       |              |   |
| Carangiformes |               | <i>Mene maculatus</i>                  | Pers. Coll.:<br>W.L.Smith 370                     | SAMN05915082 | ✓ |
| Carangiformes |               | <i>Xiphias gladius</i>                 | Pers. Coll.:<br>W.L.Smith 787                     | SAMN05785372 | ✓ |
| Carangiformes | Istiophoridae | <i>Istiophorus platypterus</i>         | KU 5428                                           | SAMN05915075 |   |
| Carangiformes | Istiophoridae | <i>Kajikia audax</i>                   | SIO 06-38                                         |              |   |
| Carangiformes | Istiophoridae | <i>Tetrapturus<br/>angustirostris</i>  | SIO 05-31                                         | SAMN05785366 |   |
| Carangiformes | Trachinotinae | <i>Scomberoides<br/>commersonianus</i> | KU 8988                                           | SAMN05785359 | ✓ |
| Carangiformes | Trachinotinae | <i>Scomberoides lysan</i>              | LSUMZ 14159<br>SAIAB AV-2010-                     |              | ✓ |
| Carangiformes | Trachinotinae | <i>Scomberoides tol</i>                | 091                                               |              | ✓ |
| Carangiformes | Trachinotinae | <i>Trachinotus baillonii</i>           | SAIAB RB-09-160                                   |              | ✓ |
| Carangiformes | Trachinotinae | <i>Trachinotus blochii</i>             | KU 6793                                           | SAMN05785368 |   |
| Carangiformes | Trachinotinae | <i>Trachinotus goodei</i>              | YFTC 1994, n.v.                                   |              | ✓ |
| Carangiformes |               | <i>Rachycentron canadum</i>            | KU 3521                                           | SAMN05915115 |   |
| Carangiformes |               | <i>Coryphaena hippurus</i>             | KU 7212                                           | SAMN05915056 | ✓ |
| Carangiformes | Echeneidae    | <i>Echeneis naucrates</i>              | SAIAB HM07-581                                    |              | ✓ |
| Carangiformes | Echeneidae    | <i>Echeneis neucratoides</i>           | KU 27104<br>SAIAB ACEP-09-                        | SAMN05785335 |   |
| Carangiformes | Echeneidae    | <i>Phtheichthys lineatus</i>           | 224                                               |              | ✓ |
| Carangiformes | Echeneidae    | <i>Remora albescens</i>                | SIO 05-37                                         |              | ✓ |
| Carangiformes | Echeneidae    | <i>Remora brachyptera</i>              | SIO 07-91                                         |              | ✓ |
| Carangiformes | Echeneidae    | <i>Remora osteochir</i>                | SIO 11-34<br>SAIAB ACEP-08-                       |              | ✓ |
| Carangiformes | Echeneidae    | <i>Remora remora</i>                   | 1660                                              |              | ✓ |
| Carangiformes | Carangidae    | <i>Alectis indicus</i>                 | KU 8966                                           | SAMN05915025 | ✓ |
| Carangiformes | Carangidae    | <i>Alepes kleinii</i>                  | KU 8966                                           | SAMN05915026 |   |
| Carangiformes | Carangidae    | <i>Alepes vari</i>                     | QM A01251                                         |              |   |
| Carangiformes | Carangidae    | <i>Alepes vari</i>                     | QM I39515                                         |              |   |
| Carangiformes | Carangidae    | <i>Carangichthys dinema</i>            | FRLM 48738                                        |              |   |
| Carangiformes | Carangidae    | <i>Carangoides armatus</i>             | LSUMZ 16745                                       |              |   |
| Carangiformes | Carangidae    | <i>Carangoides armatus</i>             | LSUMZ 16745                                       |              |   |
| Carangiformes | Carangidae    | <i>Carangoides chrysophrys</i>         | SAIAB Event Number: AV/2010-04; n.v.              |              | ✓ |
| Carangiformes | Carangidae    | <i>Carangoides ferdau</i>              | SAIAB Event Number: PCH 2005-27; n.v.             |              | ✓ |
| Carangiformes | Carangidae    | <i>Carangoides praeustus</i>           | FRLM 51405                                        |              |   |
| Carangiformes | Carangidae    | <i>Caranx caninus</i>                  | LSUMZ 17829<br>SAIAB Event Number JRG-PDO-15-215; |              | ✓ |
| Carangiformes | Carangidae    | <i>Caranx heberii</i>                  | n.v.                                              |              |   |
| Carangiformes | Carangidae    | <i>Caranx latus</i>                    | UF 180908                                         |              | ✓ |
| Carangiformes | Carangidae    | <i>Caranx latus</i>                    | UF 183512                                         |              | ✓ |
| Carangiformes | Carangidae    | <i>Caranx melampygus</i>               | KU 5657                                           | SAMN05915044 | ✓ |
| Carangiformes | Carangidae    | <i>Caranx vinctus</i>                  | LSUMZ 14570                                       |              |   |
| Carangiformes | Carangidae    | <i>Caranx vinctus</i>                  | LSUMZ 14585                                       |              |   |

|               |               |                                  |                                           |              |   |   |
|---------------|---------------|----------------------------------|-------------------------------------------|--------------|---|---|
| Carangiformes | Carangidae    | <i>Chloroscombrus orqueta</i>    | KU 8495                                   | SAMN05915053 | ✓ |   |
| Carangiformes | Carangidae    | <i>Decapterus maruadsi</i>       | KU 8984                                   | SAMN05785334 | ✓ |   |
| Carangiformes | Carangidae    | <i>Gnathanodon speciosus</i>     | LSUMZ 17993                               |              | ✓ |   |
| Carangiformes | Carangidae    | <i>Hemicaranx bicolor</i>        | MNHN 1913-0110                            |              | ✓ |   |
| Carangiformes | Carangidae    | <i>Megalaspis cordyla</i>        | KU 4705                                   | SAMN05785347 | ✓ |   |
| Carangiformes | Carangidae    | <i>Parastromateus niger</i>      | LSUMZ 17039                               |              | ✓ |   |
| Carangiformes | Carangidae    | <i>Selaroides leptolepis</i>     | LSUMZ 14065                               |              | ✓ |   |
| Carangiformes | Carangidae    | <i>Selene peruviana</i>          | SIO 07-88L                                |              |   |   |
| Carangiformes | Carangidae    | <i>Selene vomer</i>              | LSUMZ 14271                               |              | ✓ |   |
| Carangiformes | Carangidae    | <i>Seriola dumerili</i>          | Pers. Coll.: P.Wainwright, PW2629         |              | ✓ |   |
| Carangiformes | Carangidae    | <i>Seriola dumerili</i>          | SAIAB ACEP-09-314                         |              |   |   |
| Carangiformes | Carangidae    | <i>Seriola zonata</i>            | KU 1188                                   | SAMN05915125 | ✓ |   |
| Carangiformes | Carangidae    | <i>Trachurus trachurus</i>       | KU 8077                                   | SAMN05785370 | ✓ |   |
| Perciformes   | Epinephelidae | <i>Cephalopholis argus</i>       | CAS CAG01                                 | SAMN05915047 | ✓ | ✓ |
| Perciformes   | Epinephelidae | <i>Cephalopholis cruentata</i>   | YPM ICH 24718                             |              | ✓ |   |
| Perciformes   | Epinephelidae | <i>Diploprion drachi</i>         | Pers. Coll.: G. Bernardi                  |              | ✓ |   |
| Perciformes   | Epinephelidae | <i>Jeboehlkia gladifer</i>       | AMNH CUR13192                             |              |   | ✓ |
| Perciformes   | Epinephelidae | <i>Liopropoma rubre</i>          | YPM ICH 24752                             |              | ✓ |   |
| Perciformes   | Epinephelidae | <i>Rypticus subbifrenatus</i>    | YPM ICH 24697                             |              | ✓ |   |
| Perciformes   | Anthiidae     | <i>Acanthistius cinctus</i>      | KER 427                                   |              | ✓ | ✓ |
| Perciformes   | Anthiidae     | <i>Pseudanthias squamipinnis</i> | Pers. Coll.: M.Alfaro, Alfaro-969         | SAMN05915109 | ✓ | ✓ |
| Perciformes   | Anthiidae     | <i>Trachypoma macracanthus</i>   | KER 433                                   |              |   |   |
| Perciformes   | Bembropidae   | <i>Bembrops anatrostris</i>      | YFTC 14558, n.v.                          |              | ✓ |   |
| Perciformes   | Bembropidae   | <i>Chrionema furunoi</i>         | NSMT-P 78494                              |              |   |   |
| Perciformes   | Serranidae    | <i>Chelidoperca hirundinacea</i> | NSMT-P115036                              |              |   |   |
| Perciformes   | Serranidae    | <i>Hypoplectrus puella</i>       | Pers. Coll.: M.Alfaro, Alfaro-1010.1      | SAMN05915074 | ✓ |   |
| Perciformes   | Serranidae    | <i>Serranus tigrinus</i>         | Pers. Coll.: P.Wainwright, PW1343: mea207 |              | ✓ | ✓ |
| Perciformes   | Trachinidae   | <i>Echiichthys vipera</i>        | YFTC 24258, n.v.                          |              |   |   |
| Perciformes   | Trachinidae   | <i>Trachinus radiatus</i>        | n.v.                                      |              | ✓ |   |
| Perciformes   |               | <i>Nippon spinosus</i>           | SIO 00-174                                |              | ✓ | ✓ |
| Perciformes   | Percidae      | <i>Allohistium cinereum</i>      | UT 91.7531                                |              | ✓ |   |
| Perciformes   | Percidae      | <i>Ammocrypta beanii</i>         | INHS 38611                                |              | ✓ |   |
| Perciformes   | Percidae      | <i>Ammocrypta pellucida</i>      | YPM ICH 017573                            |              | ✓ |   |
| Perciformes   | Percidae      | <i>Crystallaria asprella</i>     | YFTC 686, n.v.                            |              | ✓ |   |
| Perciformes   | Percidae      | <i>Etheostoma baileyi</i>        | UT 91.7240                                |              | ✓ |   |
| Perciformes   | Percidae      | <i>Etheostoma basilare</i>       | n.v. whole fish in tissue tube            |              | ✓ |   |
| Perciformes   | Percidae      | <i>Etheostoma blennioides</i>    | YPM ICH 024144                            |              |   |   |

|             |                    |                                     |                               |     |
|-------------|--------------------|-------------------------------------|-------------------------------|-----|
| Perciformes | Percidae           | <i>Etheostoma histrio</i>           | YPM ICH 016102                | ✓   |
| Perciformes | Percidae           | <i>Etheostoma pholidotum</i>        | YPM ICH 015608                |     |
| Perciformes | Percidae           | <i>Etheostoma swaini</i>            | YPM ICH 027128                |     |
| Perciformes | Percidae           | <i>Etheostoma variatum</i>          | YPM ICH 23724                 | ✓   |
| Perciformes | Percidae           | <i>Etheostoma zonale</i>            | UT 91.6631                    | ✓   |
| Perciformes | Percidae           | <i>Nothonotus juliae</i>            | INHS 38559                    |     |
| Perciformes | Percidae           | <i>Nothonotus rufilineatus</i>      | UT 91.7011                    |     |
| Perciformes | Percidae           | <i>Perca flavescens</i>             | YPM ICH 027384                | ✓   |
| Perciformes | Percidae           | <i>Perca fluviatilis</i>            | See NCBI SRA SAMN08954933*    | ✓   |
| Perciformes | Percidae           | <i>Percina aurantiaca</i>           | INHS 64349                    | ✓   |
| Perciformes | Percidae           | <i>Percina caprodes</i>             | YPM ICH 27964                 | ✓ ✓ |
| Perciformes | Percidae           | <i>Percina cymatotaenia</i>         | YPM ICH 018551                | ✓   |
| Perciformes | Percidae           | <i>Percina evides</i>               | YPM ICH 023560                | ✓   |
| Perciformes | Percidae           | <i>Percina macrocephala</i>         | YPM ICH 024352; ex UT 91.7318 | ✓   |
| Perciformes | Percidae           | <i>Percina tanasi</i>               | YFTC 25474, n.v.              | ✓   |
| Perciformes | Percidae           | <i>Sander canadensis</i>            | n.v.                          | ✓   |
| Perciformes |                    | <i>Percophis brasiliensis</i>       | LBP 8654 T35304               | ✓   |
| Perciformes | Bovichtidae        | <i>Bovichtus chilensis</i>          | YPM ICH 027476                | ✓   |
| Perciformes | Bovichtidae        | <i>Cottoperca trigloides</i>        | YFTC 3925, n.v.               | ✓   |
| Perciformes |                    | <i>Pseudaphritus urvillii</i>       | YFTC 16619, n.v.              | ✓   |
| Perciformes |                    | <i>Eleginops maclovinus</i>         | YPM ICH 016549                | ✓   |
| Perciformes | "Nototheniidae"    | <i>Notothenia coriiceps</i>         | YPM ICH 016542                | ✓   |
| Perciformes | "Nototheniidae"    | <i>Patagonotothen ramsayi</i>       | YFTC 24090, n.v.              | ✓   |
| Perciformes | <i>Harpagifer</i>  | <i>Harpagifer bispinis</i>          | YFTC 21691, n.v.              | ✓   |
| Perciformes | <i>Harpagifer</i>  | <i>Harpagifer kerguelensis</i>      | YFTC 4830, n.v.               |     |
| Perciformes | Artedidraconidae   | <i>Artedidracono glareobarbatus</i> | YFTC 14511, n.v.              | ✓   |
| Perciformes | Artedidraconidae   | <i>Pogonophryne cerebropogon</i>    | YFTC 24233, n.v.              | ✓   |
| Perciformes | "Bathydraconidae"  | <i>Akarotaxis nudiceps</i>          | YPM ICH 024118                | ✓   |
| Perciformes | "Bathydraconidae"  | <i>Parachaenichthys charcoti</i>    | YPM ICH 022368                |     |
| Perciformes | Channichthyidae    | <i>Chaenocephalus aceratus</i>      | See NCBI SRA SAMEA4028820*    | ✓   |
| Perciformes | Channichthyidae    | <i>Chionodraco rastrispinosus</i>   | YPM ICH 016672                | ✓   |
| Perciformes | Channichthyidae    | <i>Pagetopsis macropterus</i>       | NZNM 043556                   |     |
| Perciformes | Platycephalidae    | <i>Platycephalus indicus</i>        | ASIZ 10910261                 | ✓   |
| Perciformes |                    | <i>Normanichthys crockeri</i>       | Pers. Coll.: Leonardo Castro  | ✓   |
| Perciformes | <i>Hoplichthys</i> | <i>Hoplichthys gilberti</i>         | ASIZP 9010790                 | ✓   |
| Perciformes | <i>Hoplichthys</i> | <i>Hoplichthys langsdorfii</i>      | ASIZP 0913594                 | ✓   |
| Perciformes | Neosebastidae      | <i>Neosebastes thetidis</i>         | NMV A 22113                   | ✓   |
| Perciformes | Congiopodidae      | <i>Congiopodus leucopaecilus</i>    | NZNM 044580                   | ✓   |

|             |                 |                                      |                                                          |   |
|-------------|-----------------|--------------------------------------|----------------------------------------------------------|---|
| Perciformes | Synanceiidae    | <i>Inimicus didactylus</i>           | Pers. Coll.: P.Wainwright, PCW 3785                      | ✓ |
| Perciformes | Synanceiidae    | <i>Minous trachycephalus</i>         | NMV A 29712-004                                          | ✓ |
| Perciformes | Scorpaenidae    | <i>Sebastes aleutianus</i>           | See NCBI SRA SAMN03964772*                               | ✓ |
| Perciformes | Scorpaenidae    | <i>Sebastes koreanus</i>             | See NCBI SRA SAMN10490951*                               |   |
| Perciformes | Scorpaenidae    | <i>Sebastes minor</i>                | See NCBI SRA SAMN03354192*                               |   |
| Perciformes | Scorpaenidae    | <i>Sebastes nigrocinctus</i>         | See NCBI SRA SAMN02981553*                               | ✓ |
| Perciformes | Scorpaenidae    | <i>Sebastes norvegicus</i>           | See NCBI SRA SAMEA4028819*                               | ✓ |
| Perciformes | Scorpaenidae    | <i>Sebastes nudus</i>                | See NCBI SRA SAMN10490952*                               |   |
| Perciformes | Scorpaenidae    | <i>Sebastes rubrivinctus</i>         | See NCBI SRA SAMN02981552*                               |   |
| Perciformes | Scorpaenidae    | <i>Sebastes schlegelii</i>           | See NCBI SRA SAMN10490953*                               | ✓ |
| Perciformes | Scorpaenidae    | <i>Sebastes steindachneri</i>        | See NCBI SRA SAMN03579458*                               | ✓ |
| Perciformes | Scorpaenidae    | <i>Taenianotus triacanthus</i>       | Pers. Coll.: M.Alfaro, Alfaro-889 SAMN05915130           | ✓ |
| Perciformes | Bembridae       | <i>Bembras japonicus</i>             | ASIZPO 910626                                            |   |
| Perciformes | Bembridae       | <i>Parabembras curtus</i>            | ASIZPO 910628                                            |   |
| Perciformes | Triglidae       | <i>Prionotus evolans</i>             | YPM ICH 017358                                           | ✓ |
| Perciformes | Triglidae       | <i>Pterygotrigla hemisticta</i>      | ASIZP 091046                                             |   |
| Perciformes | Anoplopomatidae | <i>Anoplopoma fimbria</i>            | See NCBI SRA SAMN02144194*                               | ✓ |
| Perciformes | Anoplopomatidae | <i>Erilepis zonifer</i>              | YPM ICH 026411                                           |   |
| Perciformes | Zaniolepididae  | <i>Oxylebius pictus</i>              | UW 113229                                                | ✓ |
| Perciformes | Zaniolepididae  | <i>Zaniolepis frenata</i>            | UW 119888                                                | ✓ |
| Perciformes | Zaniolepididae  | <i>Zaniolepis latipinnis</i>         | FMNH 121496                                              | ✓ |
| Perciformes | Hexagrammidae   | <i>Hexagrammos decagrammus</i>       | INHS 45417                                               | ✓ |
| Perciformes | Trichodontidae  | <i>Trichodon trichodon</i>           | UW 117635                                                | ✓ |
| Perciformes | Cyclopteridae   | <i>Eumicrotremus orbis</i>           | Pers. Coll.: P.Wainwright, PW2499                        | ✓ |
| Perciformes | Liparidae       | <i>Liparis mucosus</i>               | n.v.                                                     | ✓ |
| Perciformes | Liparidae       | <i>Paraliparis meganchus</i>         | YPM ICH 022466                                           | ✓ |
| Perciformes | Liparidae       | <i>Pseudoliparis</i> sp.             | See NCBI SRA SAMN10662039*<br>Pers. Coll.: M.Miya 01-054 |   |
| Perciformes | Rhamphocottidae | <i>Ereunias grillator</i>            |                                                          |   |
| Perciformes | Rhamphocottidae | <i>Rhamphocottus richardsoni</i>     | Pers. Coll.: P.Wainwright, PW2440                        | ✓ |
| Perciformes |                 | <i>Scorpaenichthys marmoratus</i>    | Pers. Coll.: P.Wainwright, PW222: B04                    | ✓ |
| Perciformes |                 | <i>Aspidophoroides monopterygius</i> | YPM ICH 020685                                           | ✓ |
| Perciformes | Agonidae        | <i>Blepsias cirrhosus</i>            | Pers. Coll.: P.Wainwright, PW2441                        | ✓ |
| Perciformes | Agonidae        | <i>Hemitripterus bolini</i>          | UW 151146                                                | ✓ |
| Perciformes | Agonidae        | <i>Stellerina xyosterna</i>          | n.v.                                                     | ✓ |
| Perciformes | Cottidae        | <i>Cottus carolinae</i>              | YPM ICH 021076                                           | ✓ |
| Perciformes | Cottidae        | <i>Cottus rhenanus</i>               | See NCBI SRA SAMN04145896*                               |   |
| Perciformes | Psychrolutidae  | <i>Cottunculus thomsonii</i>         | MCZ 159183                                               | ✓ |
| Perciformes | Psychrolutidae  | <i>Malacocottus zonorus</i>          | KU 28057                                                 | ✓ |

|             |                        |                                      |                  |               |   |
|-------------|------------------------|--------------------------------------|------------------|---------------|---|
| Perciformes | Psychrolutidae         | <i>Myoxocephalus aenaeus</i>         | YPM ICH 021194   |               | ✓ |
| Perciformes | Psychrolutidae         | <i>Myoxocephalus scorpius</i>        | See NCBI SRA     | SAMEA4028818* | ✓ |
| Perciformes | Psychrolutidae         | <i>Triglops murrayi</i>              | YPM ICH 020694   |               | ✓ |
| Perciformes |                        | <i>Hypoptychus dybowskii</i>         | NSMT-P72827      |               |   |
| Perciformes |                        | <i>Aulichthys japonicus</i>          | NSMT-P72829      |               | ✓ |
| Perciformes | Gasterosteidae         | <i>Gasterosteus islandicus</i>       | YFTC 16641, n.v. |               | ✓ |
| Perciformes | Gasterosteidae         | <i>Pungitius pungitius</i>           | See NCBI SRA     | SAMN05210078* | ✓ |
| Perciformes | Gasterosteidae         | <i>Spinachia spinachia</i>           | YFTC 16669, n.v. |               | ✓ |
| Perciformes | Bathymasteridae        | <i>Bathymaster caeruleofasciatus</i> | UW 150110        |               | ✓ |
| Perciformes | Bathymasteridae        | <i>Bathymaster leurolepis</i>        | UW 48567         |               | ✓ |
| Perciformes | Bathymasteridae        | <i>Bathymaster signatus</i>          | UW 119600        |               | ✓ |
| Perciformes | Bathymasteridae        | <i>Rathbunella hypoplecta</i>        | n.v.             |               |   |
| Perciformes | Bathymasteridae        | <i>Ronquilus jordani</i>             | UW 116967        |               | ✓ |
| Perciformes |                        | <i>Cebidichthys violaceus</i>        | INHS 45421       |               | ✓ |
| Perciformes | Stichaeidae            | <i>Alectrias alectrolophus</i>       | UW 47876         |               | ✓ |
| Perciformes | Stichaeidae            | <i>Anoplarchus insignis</i>          | UW 47871         |               | ✓ |
| Perciformes | Stichaeidae            | <i>Anoplarchus purpurescens</i>      | UW 151344        |               | ✓ |
| Perciformes | Stichaeidae            | <i>Bryozoichthys lysimus</i>         | UW 150624        |               | ✓ |
| Perciformes | Stichaeidae            | <i>Bryozoichthys marjorius</i>       | UW 150104        |               | ✓ |
| Perciformes | Stichaeidae            | <i>Chirolophis decoratus</i>         | UW 119212        |               | ✓ |
| Perciformes | Stichaeidae            | <i>Chirolophis japonicus</i>         | UW 47908         |               |   |
| Perciformes | Stichaeidae            | <i>Chirolophis snyderi</i>           | UW 150723        |               |   |
| Perciformes | Stichaeidae            | <i>Ernogrammus hexagrammus</i>       | UW 47891         |               | ✓ |
| Perciformes | Stichaeidae            | <i>Eumesogrammus praecisus</i>       | UW 150174        |               | ✓ |
| Perciformes | Stichaeidae            | <i>Phytichthys chirus</i>            | UW 151660        |               |   |
| Perciformes | Stichaeidae            | <i>Scytalina cerdale</i>             | YPM ICH 026410   |               |   |
| Perciformes | Stichaeidae            | <i>Stichaeopsis nana</i>             | UW 47889         |               |   |
| Perciformes | Stichaeidae            | <i>Stichaeus grigorjewi</i>          | UW 47895         |               | ✓ |
| Perciformes | Stichaeidae            | <i>Stichaeus nozawai</i>             | UW 47894         |               | ✓ |
| Perciformes | Stichaeidae            | <i>Stichaeus punctatus</i>           | UW 150124        |               | ✓ |
| Perciformes | Stichaeidae            | <i>Xiphister atropurpureus</i>       | UW 151673        |               |   |
| Perciformes | Stichaeidae            | <i>Xiphister mucosus</i>             | UW 151678        |               | ✓ |
| Perciformes | <i>Cryptacanthodes</i> | <i>Cryptacanthodes aleutensis</i>    | UW 48737         |               |   |
| Perciformes | <i>Cryptacanthodes</i> | <i>Cryptacanthodes giganteus</i>     | UW 48792         |               |   |
| Perciformes | <i>Cryptacanthodes</i> | <i>Cryptacanthodes maculatus</i>     | YPM ICH 020687   |               | ✓ |
| Perciformes | Lumpenidae             | <i>Acantholumpenus mackayi</i>       | UW 150276        |               | ✓ |
| Perciformes | Lumpenidae             | <i>Anisarchus medius</i>             | UW 49373         |               | ✓ |
| Perciformes | Lumpenidae             | <i>Anisarchus medius</i>             | UW 152055        |               |   |

|             |                  |                                      |                                       |   |   |
|-------------|------------------|--------------------------------------|---------------------------------------|---|---|
| Perciformes | Lumpenidae       | <i>Leptoclinus maculatus</i>         | UW 49369                              | ✓ |   |
| Perciformes | Lumpenidae       | <i>Leptoclinus maculatus</i>         | UW 151205                             |   | ✓ |
| Perciformes | Lumpenidae       | <i>Lumpenella longirostris</i>       | UW 151000                             | ✓ |   |
| Perciformes | Lumpenidae       | <i>Lumpenus sagitta</i>              | UW 150616                             | ✓ |   |
| Perciformes | Lumpenidae       | <i>Poroclinus rothrocki</i>          | UW 150577                             | ✓ |   |
| Perciformes |                  | <i>Zaprora silenus</i>               | UW 152655                             | ✓ |   |
| Perciformes |                  | <i>Zaprora silenus</i>               | UW 150107                             |   |   |
| Perciformes | Opisthocentridae | <i>Askoldia variegata</i>            | UW 44508                              |   |   |
| Perciformes | Opisthocentridae | <i>Opisthocentrus ocellatus</i>      | UW 44935                              | ✓ |   |
| Perciformes | Opisthocentridae | <i>Opisthocentrus tenuis</i>         | UW 47877                              | ✓ |   |
| Perciformes | Opisthocentridae | <i>Opisthocentrus zonope</i>         | UW 47885                              | ✓ |   |
| Perciformes | Opisthocentridae | <i>Pholidapus dybowskii</i>          | UW 47882                              |   |   |
| Perciformes |                  | <i>Ptilichthys goodei</i>            | Pers. Coll.: P.Wainwright, PCW 2416   | ✓ |   |
| Perciformes | Pholidae         | <i>Apodichthys flavidus</i>          | UW 151663                             | ✓ |   |
| Perciformes | Pholidae         | <i>Pholis clemensi</i>               | UW 47872                              |   |   |
| Perciformes | Pholidae         | <i>Pholis laeta</i>                  | UW 43793                              |   |   |
| Perciformes | Pholidae         | <i>Pholis ornata</i>                 | Pers. Coll.: P.Wainwright, PW244: B27 | ✓ |   |
| Perciformes | Pholidae         | <i>Pholis ornata</i>                 | UW 151676                             |   |   |
| Perciformes | Pholidae         | <i>Rhodymenichthys dolichogaster</i> | UW 44516                              | ✓ |   |
| Perciformes |                  | <i>Gymnoclinus cristulatus</i>       | UW 44509                              |   |   |
| Perciformes | Neozoarcidae     | <i>Neozoarces steindachneri</i>      | UW 47875                              |   |   |
| Perciformes | Anarhichadidae   | <i>Anarhichas orientalis</i>         | UW 150194                             | ✓ |   |
| Perciformes | Anarhichadidae   | <i>Anarhichas orientalis</i>         | UW 111905                             |   |   |
| Perciformes | Anarhichadidae   | <i>Anarrhichthys ocellatus</i>       | UW 49014                              |   |   |
| Perciformes | Zoarcidae        | <i>Bothrocara brunneum</i>           | UW 150525                             | ✓ |   |
| Perciformes | Zoarcidae        | <i>Bothrocara molle</i>              | UW 111363                             | ✓ |   |
| Perciformes | Zoarcidae        | <i>Bothrocara pusillum</i>           | UW 151315                             | ✓ |   |
| Perciformes | Zoarcidae        | <i>Bothrocara zestum</i>             | UW 150975                             |   |   |
| Perciformes | Zoarcidae        | <i>Gymnelus viridis</i>              | UW 150119                             | ✓ |   |
| Perciformes | Zoarcidae        | <i>Lycenchelys camchatica</i>        | UW 119335                             | ✓ |   |
| Perciformes | Zoarcidae        | <i>Lycenchelys crotalinus</i>        | UW 118611                             | ✓ |   |
| Perciformes | Zoarcidae        | <i>Lycodapus fierasfer</i>           | UW 115137                             | ✓ |   |
| Perciformes | Zoarcidae        | <i>Lycodapus mandibularis</i>        | UW 152155                             | ✓ |   |
| Perciformes | Zoarcidae        | <i>Lycodes akuugun</i>               | UW 117198                             |   |   |
| Perciformes | Zoarcidae        | <i>Lycodes beringi</i>               | UW 150976                             | ✓ |   |
| Perciformes | Zoarcidae        | <i>Lycodes brevipes</i>              | UW 151235                             | ✓ |   |
| Perciformes | Zoarcidae        | <i>Lycodes concolor</i>              | UW 150529                             | ✓ |   |
| Perciformes | Zoarcidae        | <i>Lycodes cortezianus</i>           | UW 115164                             | ✓ |   |
| Perciformes | Zoarcidae        | <i>Lycodes diapterus</i>             | YFTC 13952, n.v.                      | ✓ |   |

|                  |                    |                                  |                                        |               |   |
|------------------|--------------------|----------------------------------|----------------------------------------|---------------|---|
| Perciformes      | Zoarcidae          | <i>Lycodes diapterus</i>         | UW 119963                              |               |   |
| Perciformes      | Zoarcidae          | <i>Lycodes mucosus</i>           | UW 152426                              |               |   |
| Perciformes      | Zoarcidae          | <i>Lycodes pacificus</i>         | UW 119472                              |               | ✓ |
| Perciformes      | Zoarcidae          | <i>Lycodes pacificus</i>         | UW 113585                              |               |   |
| Perciformes      | Zoarcidae          | <i>Lycodes palearis</i>          | UW 152045                              |               | ✓ |
| Perciformes      | Zoarcidae          | <i>Lycodes polaris</i>           | UW 152421                              |               | ✓ |
| Perciformes      | Zoarcidae          | <i>Lycodes raridens</i>          | UW 152485                              |               | ✓ |
| Perciformes      | Zoarcidae          | <i>Lycodes turneri</i>           | UW 150133                              |               | ✓ |
| Perciformes      | Zoarcidae          | <i>Puzanovia rubra</i>           | UW 150349                              |               |   |
| Perciformes      | Zoarcidae          | <i>Zoarcis elongatus</i>         | UW 44917                               |               | ✓ |
| Centrarchiformes | <i>Percalates</i>  | <i>Percalates colonorum</i>      | Pers. Coll.: Peter Unmack              |               | ✓ |
| Centrarchiformes | Girellidae         | <i>Girella nigricans</i>         | Pers. Coll.: Giacomo Bernardi          |               | ✓ |
| Centrarchiformes | Scorpididae        | <i>Medialuna californiensis</i>  | YFTC 21006, n.v.                       |               | ✓ |
| Centrarchiformes | Scorpididae        | <i>Scorpis georgiana</i>         | Pers. Coll.: JP Hobbs                  |               | ✓ |
| Centrarchiformes | <i>Dichistius</i>  | <i>Dichistius capensis</i>       | SAIAB 87252                            |               |   |
| Centrarchiformes | <i>Dichistius</i>  | <i>Dichistius multifasciatus</i> | SAIAB 86789                            |               |   |
| Centrarchiformes | Microcanthidae     | <i>Microcanthus strigatus</i>    | Pers. Coll.: JP Hobbs                  |               |   |
| Centrarchiformes | Microcanthidae     | <i>Tilodon sexfasciatus</i>      | Pers. Coll.: JP Hobbs                  |               |   |
| Centrarchiformes | <i>Oplegnathus</i> | <i>Oplegnathus conwayi</i>       | SIO 05-48                              |               |   |
| Centrarchiformes | <i>Oplegnathus</i> | <i>Oplegnathus fasciatus</i>     | See NCBI SRA                           | SAMN07331350* | ✓ |
| Centrarchiformes | <i>Oplegnathus</i> | <i>Oplegnathus peaolopesi</i>    | SAIAB 86857                            |               |   |
| Centrarchiformes | Kyphosidae         | <i>Kyphosus sectatrix</i>        | YPM ICH 024907                         |               | ✓ |
| Centrarchiformes | Kyphosidae         | <i>Kyphosus vaigiensis</i>       | NMND 403373                            |               | ✓ |
| Centrarchiformes | <i>Kuhlia</i>      | <i>Kuhlia marginata</i>          | UF 162616                              |               | ✓ |
| Centrarchiformes | <i>Kuhlia</i>      | <i>Kuhlia rupestris</i>          | KU 5666                                |               | ✓ |
| Centrarchiformes | Terapontidae       | <i>Bidyanus bidyanus</i>         | Pers. Coll.: Peter Unmack              |               | ✓ |
| Centrarchiformes | Terapontidae       | <i>Hephaestus fuliginosus</i>    | Pers. Coll.: Peter Unmack              |               | ✓ |
| Centrarchiformes | Terapontidae       | <i>Scortum barcoo</i>            | Pers. Coll.: Peter Unmack              |               |   |
| Centrarchiformes | Terapontidae       | <i>Terapon jarbua</i>            | Pers. Coll.: Peter Unmack              |               | ✓ |
| Centrarchiformes |                    | <i>Enoplosus armatus</i>         | Pers. Coll.: P.Wainwright, PW 3119     |               | ✓ |
| Centrarchiformes | Percichthyidae     | <i>Maccullochella peelii</i>     | Pers. Coll.: P.Wainwright, PW 1633     |               | ✓ |
| Centrarchiformes | Percichthyidae     | <i>Nannoperca australis</i>      | Pers. Coll.: Peter Unmack              |               |   |
| Centrarchiformes | Percichthyidae     | <i>Percilia gillissi</i>         | Pers. Coll.: Peter Unmack              |               |   |
| Centrarchiformes | Percichthyidae     | <i>Percilia irwini</i>           | Pers. Coll.: Peter Unmack              |               |   |
| Centrarchiformes | Sinipercaidae      | <i>Coreoperca herzi</i>          | YPM ICH 026803                         |               | ✓ |
| Centrarchiformes | Sinipercaidae      | <i>Siniperca chuatzii</i>        | YPM ICH 023856                         |               | ✓ |
| Centrarchiformes | Centrarchidae      | <i>Elassoma okefenokee</i>       | Pers. Coll.: P.Wainwright, PW667: FL18 |               | ✓ |

|                  |                       |                                     |                                          |              |   |
|------------------|-----------------------|-------------------------------------|------------------------------------------|--------------|---|
| Centrarchiformes | Centrarchidae         | <i>Elassoma zonatum</i>             | YPM ICH 021245                           |              | ✓ |
| Centrarchiformes | Centrarchidae         | <i>Enneacanthus chaetodon</i>       | UF 236219                                |              | ✓ |
| Centrarchiformes | Centrarchidae         | <i>Micropterus salmoides</i>        | YPM ICH 023651                           | SAMN05915084 | ✓ |
| Centrarchiformes | Cirrhitidae           | <i>Amblycirrhitus pinos</i>         | USNM 349043                              |              | ✓ |
| Centrarchiformes | Cirrhitidae           | <i>Cirrhitichthys falco</i>         | USNM 334280                              |              | ✓ |
| Centrarchiformes | Latridae              | <i>Chirodactylus brachydactylus</i> | KU 6471                                  |              | ✓ |
| Centrarchiformes | Latridae              | <i>Latridopsis fosteri</i>          | YFTC 24241, n.v.<br>SAMA ABTC<br>102988  |              |   |
| Centrarchiformes | Latridae              | <i>Latris lineata</i>               |                                          |              |   |
| Centrarchiformes | <i>Chironemus</i>     | <i>Chironemus bicornis</i>          | FMNH 107336                              |              | ✓ |
| Centrarchiformes | <i>Cheilodactylus</i> | <i>Cheilodactylus fasciatus</i>     | Pers. Coll.: Chris<br>Burridge           | SRX5100538   | ✓ |
| Centrarchiformes | <i>Aplodactylus</i>   | <i>Aplodactylus arctidens</i>       | NMV A 24857                              |              | ✓ |
| Centrarchiformes | <i>Aplodactylus</i>   | <i>Aplodactylus lophodon</i>        | Pers. Coll.: Chris<br>Burridge           | SRR8285884   | ✓ |
| Labriiformes     | Uranoscopidae         | <i>Astroscopus y graecum</i>        | KU 22957                                 |              | ✓ |
| Labriiformes     | Uranoscopidae         | <i>Kathetostoma averruncus</i>      | KU 28152                                 |              | ✓ |
| Labriiformes     | Ammodytidae           | <i>Ammodytes hexapterus</i>         | Pers. Coll.: P.Wainwright, PW2451        |              | ✓ |
| Labriiformes     | Pinguipedidae         | <i>Parapercis hexophtalma</i>       | SAIAB 77885                              |              | ✓ |
| Labriiformes     |                       | <i>Cheimarrichthys fosteri</i>      | See NCBI SRA                             | SAMN05915051 | ✓ |
| Labriiformes     | Leptoscopidae         | <i>Crapatalus munroi</i>            | CSIRO H 7106-01                          |              |   |
| Labriiformes     | Leptoscopidae         | <i>Lesueurina platycephala</i>      | CSIRO H 7106-03                          |              |   |
| Labriiformes     |                       | <i>Centrogenys vaigiensis</i>       | LSUMZ 16511                              |              | ✓ |
| Labriiformes     |                       | <i>Centrogenys vaigiensis</i>       | LSUMZ 16559                              |              | ✓ |
| Labriiformes     |                       | <i>Centrogenys vaigiensis</i>       | LSUMZ 16559                              |              |   |
| Labriiformes     | Labridae              | <i>Achoerodus viridis</i>           | Pers. Coll.: D.Bellwood M507, n.v.       |              |   |
| Labriiformes     | Labridae              | <i>Bodianus rufus</i>               | Pers. Coll.: D.Bellwood M383, n.v.       |              | ✓ |
| Labriiformes     | Labridae              | <i>Bolbometopon muricatum</i>       | Pers. Coll.: D.Bellwood Choat_SIO1, n.v. |              | ✓ |
| Labriiformes     | Labridae              | <i>Calotomus spinidens</i>          | Pers. Coll.: H.Choat G2118, n.v.         |              | ✓ |
| Labriiformes     | Labridae              | <i>Cetoscarus bicolor</i>           | Pers. Coll.: H.Choat G113, n.v.          |              | ✓ |
| Labriiformes     | Labridae              | <i>Cheilinus fasciatus</i>          | Pers. Coll.: D.Bellwood M215, n.v.       |              | ✓ |
| Labriiformes     | Labridae              | <i>Cheilio inermis</i>              | Pers. Coll.: D.Bellwood M1187, n.v.      |              | ✓ |
| Labriiformes     | Labridae              | <i>Chlorurus japanensis</i>         | Pers. Coll.: H.Choat PFC5870, n.v.       |              | ✓ |
| Labriiformes     | Labridae              | <i>Choerodon anchorago</i>          | Pers. Coll.: D.Bellwood M12, n.v.        |              | ✓ |
| Labriiformes     | Labridae              | <i>Coris atlantica</i>              | Pers. Coll.: D.Bellwood M1692, n.v.      |              |   |
| Labriiformes     | Labridae              | <i>Coris gaimard</i>                | Pers. Coll.: D.Bellwood M1359, n.v.      |              | ✓ |
| Labriiformes     | Labridae              | <i>Epibulus insidiator</i>          | Pers. Coll.:<br>P.Wainwright,<br>PW1897B | SAMN05915062 | ✓ |
| Labriiformes     | Labridae              | <i>Halichoeres poeyi</i>            | P.Wainwright, PW46                       | SAMN05915071 | ✓ |
| Labriiformes     | Labridae              | <i>Halichoeres radiatus</i>         | CAS HRA01                                | SAMN05915072 | ✓ |
| Labriiformes     | Labridae              | <i>Heteroscarus acroptilus</i>      | Pers. Coll.: D.Bellwood M492, n.v.       |              |   |



|                  |                      |                                  |                                    |   |   |
|------------------|----------------------|----------------------------------|------------------------------------|---|---|
| Labriformes      | Labridae             | <i>Hipposcarus harid</i>         | Pers. Coll.: H.Choat PFC6379, n.v. | ✓ |   |
| Labriformes      | Labridae             | <i>Labrichthys unilineatus</i>   | Pers. Coll.: D.Bellwood M254, n.v. | ✓ |   |
| Labriformes      | Labridae             | <i>Labrus bergylta</i>           | See NCBI SRA SAMEA3939555*         | ✓ |   |
| Labriformes      | Labridae             | <i>Lachnolaimus maximus</i>      | Pers. Coll.: D.Bellwood M397, n.v. | ✓ | ✓ |
| Labriformes      | Labridae             | <i>Pseudodax moluccanus</i>      | Pers. Coll.: D.Bellwood M62, n.v.  | ✓ |   |
| Labriformes      | Labridae             | <i>Scarus flavipectoralis</i>    | Pers. Coll.: H.Choat G228, n.v.    | ✓ |   |
| Labriformes      | Labridae             | <i>Scarus taeniopterus</i>       | Pers. Coll.: H.Choat G754, n.v.    | ✓ | ✓ |
| Labriformes      | Labridae             | <i>Sparisoma radians</i>         | Pers. Coll.: H.Choat A10, n.v.     | ✓ |   |
| Labriformes      | Labridae             | <i>Symphodus melops</i>          | See NCBI SRA SAMEA4028821*         | ✓ |   |
| Labriformes      | Labridae             | <i>Thalassoma ballieui</i>       | CAS TBA-04 SAMN05915134            | ✓ |   |
| Labriformes      | Labridae             | <i>Wetmorella albofasciata</i>   | Pers. Coll.: D.Bellwood M288, n.v. | ✓ |   |
| Acropomatiformes | <i>Ostracoberyx</i>  | <i>Ostracoberyx dorygenys</i>    | ASIZPO 911526                      |   |   |
| Acropomatiformes | Acropomatidae        | <i>Acropoma japonica</i>         | YPM ICH 010066                     |   | ✓ |
| Acropomatiformes | Acropomatidae        | <i>Doederleinia berycoides</i>   | NMV Z 6813                         |   |   |
| Acropomatiformes | <i>Scombrops</i>     | <i>Scombrops boops</i>           | YFTC 24186, n.v.                   |   |   |
| Acropomatiformes | <i>Scombrops</i>     | <i>Scombrops gilberti</i>        | YFTC 24191, n.v.                   |   |   |
| Acropomatiformes | <i>Scombrops</i>     | <i>Scombrops gilberti</i>        | YFTC 24192, n.v.                   |   |   |
| Acropomatiformes | <i>Scombrops</i>     | <i>Scombrops gilberti</i>        | YFTC 24193, n.v.                   |   |   |
| Acropomatiformes | <i>Symphysanodon</i> | <i>Symphysanodon berryi</i>      | YPM ICH 028303                     | ✓ |   |
| Acropomatiformes | <i>Symphysanodon</i> | <i>octoactinus</i>               | USNM 406214                        | ✓ |   |
| Acropomatiformes | Epigonidae           | <i>Brinkmannella carpenteri</i>  | YPM ICH 028297                     |   |   |
| Acropomatiformes | Howellidae           | <i>Howella atlantica</i>         | YPM ICH 028408                     |   |   |
| Acropomatiformes | Howellidae           | <i>Howella brodiei</i>           | YPM ICH 027798                     |   |   |
| Acropomatiformes | <i>Polyprion</i>     | <i>Polyprion americanus</i>      | AMS I.42844-002                    | ✓ |   |
| Acropomatiformes | <i>Glaucosoma</i>    | <i>Glaucosoma hebraicum</i>      | YFTC 18186, n.v.                   |   |   |
| Acropomatiformes | Pempheridae          | <i>Pempheris schomburgkii</i>    | YPM ICH 24903 SAMN05915096         | ✓ |   |
| Acropomatiformes | <i>Lateolabrax</i>   | <i>Lateolabrax japonicus</i>     | YFTC 25777, n.v.                   | ✓ |   |
| Acropomatiformes | <i>Lateolabrax</i>   | <i>Lateolabrax japonicus</i>     | See NCBI SRA SAMN07680090*         |   |   |
| Acropomatiformes | <i>Lateolabrax</i>   | <i>Lateolabrax latus</i>         | KAUM 51068                         |   |   |
| Acropomatiformes | <i>Stereolepis</i>   | <i>Stereolepis gigas</i>         | SIO 03-74                          | ✓ |   |
| Acropomatiformes | <i>Banjos</i>        | <i>Banjos banjos</i>             | ASIZPO 801399                      | ✓ |   |
| Acropomatiformes | Pentacerotidae       | <i>Pentaceros japonicus</i>      | ASIZD 0800699                      |   |   |
| Acropomatiformes | Pentacerotidae       | <i>Pseudopentaceros wheeleri</i> | UW 116954                          |   |   |
| Acropomatiformes | Bathyclupeidae       | <i>Neobathyclupea argentea</i>   | YPM ICH 028270                     |   |   |
| Acropomatiformes | Bathyclupeidae       | <i>Neobathyclupea gracilis</i>   | NMV A 25118-003                    |   |   |
| Acropomatiformes | <i>Champsodon</i>    | <i>Champsodon sechellensis</i>   | SAIAB 84026                        |   |   |
| Acropomatiformes | <i>Champsodon</i>    | <i>Champsodon snyderi</i>        | ASIZPO 910951                      |   |   |
| Acropomatiformes | Creediidae           | <i>Limnichthys</i> sp.           | KU 782                             |   |   |
| Acropomatiformes | Creediidae           | <i>Tewara cranwellae</i>         | NMNZ<br>P.044479/TS1               |   |   |

|                  |                 |                                   |                                                 |               |   |   |
|------------------|-----------------|-----------------------------------|-------------------------------------------------|---------------|---|---|
| Acropomatiformes | Hemerocoetidae  | <i>Enigmapercis</i> sp.           | NSMT-P 114722                                   |               | ✓ |   |
| Acropomatiformes | Hemerocoetidae  | <i>Osopsaron formosensis</i>      | NSMT-P 77318                                    |               |   | ✓ |
| Acropomatiformes | Hemerocoetidae  | <i>Pteropsaron evolans</i>        | NSMT-P 77317                                    |               |   |   |
| Euperciformes    | Gerreidae       | <i>Eucinostomus jonesii</i>       | YPM ICH 24864                                   |               | ✓ | ✓ |
| Euperciformes    | Gerreidae       | <i>Gerres cinereus</i>            | YPM ICH 24843                                   |               | ✓ |   |
| Euperciformes    | Moronidae       | <i>Dicentrarchus labrax</i>       | Pers. Coll.: F.J. Sanchez Vazques, U. of Murica |               | ✓ |   |
| Euperciformes    | Moronidae       | <i>Morone saxatilis</i>           | YPM ICH 018448                                  |               | ✓ |   |
| Euperciformes    | Sillaginidae    | <i>Sillago chondropus</i>         | Pers. Coll.: W.L.Smith                          |               |   |   |
| Euperciformes    | Sillaginidae    | <i>Sillago sihama</i>             | SAIAB 77085                                     |               | ✓ |   |
| Euperciformes    | <i>Drepane</i>  | <i>Drepane punctata</i>           | ROM 69918                                       |               | ✓ |   |
| Euperciformes    | Ephippidae      | <i>Platax orbicularis</i>         | SAIAB 77666                                     |               | ✓ |   |
| Euperciformes    | Dinopercaidae   | <i>Dinoperca petersi</i>          | SAIAB 81789                                     |               | ✓ |   |
| Euperciformes    | Haemulidae      | <i>Haemulon album</i>             | CAS HAL01                                       | SAMN05915068  | ✓ |   |
| Euperciformes    | Haemulidae      | <i>Haemulon flavolineatum</i>     | CAS HFG04                                       | SAMN05915069  | ✓ |   |
| Euperciformes    | Haemulidae      | <i>Haemulon parra</i>             | CAS HPA01                                       | SAMN05915070  | ✓ |   |
| Euperciformes    | Sciaenidae      | <i>Collichthys lucidus</i>        | See NCBI SRA                                    | SAMN10225518* | ✓ |   |
| Euperciformes    | Sciaenidae      | <i>Larimichthys crocea</i>        | See NCBI SRA                                    | SAMN10434301* | ✓ |   |
| Euperciformes    | Sciaenidae      | <i>Micropogonias undulatus</i>    | YPM ICH 023546                                  | SAMN05915083  | ✓ |   |
| Euperciformes    | Sciaenidae      | <i>Miichthys miiuy</i>            | See NCBI SRA                                    | SAMN02486174* | ✓ |   |
| Euperciformes    | Sciaenidae      | <i>Nibea albiflora</i>            | See NCBI SRA                                    | SAMEA1067819* | ✓ |   |
| Euperciformes    | Sciaenidae      | <i>Pareques acuminatus</i>        | CAS PAC20                                       | SAMN05915094  | ✓ |   |
| Euperciformes    | Monodactylidae  | <i>Monodactylus sebae</i>         | YPM ICH 020540                                  |               | ✓ |   |
| Euperciformes    | Lobotidae       | <i>Hapalogenys dampieriensis</i>  | NMV Z 6535                                      |               |   |   |
| Euperciformes    | Lobotidae       | <i>Lobotes surinamensis</i>       | Pers. Coll.: P.Wainwright, PW2610               |               | ✓ |   |
| Euperciformes    | Emmelichthyidae | <i>Erythrocles schlegelii</i>     | KU 7270                                         |               | ✓ |   |
| Euperciformes    | Lutjanidae      | <i>Lutjanus goreensis</i>         | CAS LGO01                                       | SAMN05915081  | ✓ |   |
| Euperciformes    | Malacanthidae   | <i>Caulolatilus princeps</i>      | SIO 08-66                                       |               | ✓ |   |
| Euperciformes    | Malacanthidae   | <i>Malacanthus plumieri</i>       | Pers. Coll.: P.Wainwright, PW1198               |               | ✓ |   |
| Euperciformes    | Pomacanthidae   | <i>Centropyge flavissima</i>      | YPM ICH 026532                                  |               | ✓ |   |
| Euperciformes    | Pomacanthidae   | <i>Chaetodontoplus melanosoma</i> | Pers. Coll.: P.Wainwright, PW643                |               | ✓ | ✓ |
| Euperciformes    | Pomacanthidae   | <i>Holocanthus passer</i>         | Pers. Coll.: P.Wainwright, PW642                |               | ✓ | ✓ |
| Euperciformes    | Pomacanthidae   | <i>Pomacanthus paru</i>           | CAS PPA01                                       | SAMN05915105  | ✓ |   |
| Euperciformes    | Leiognathidae   | <i>Gazza minuta</i>               | YFTC 18187, n.v.                                |               | ✓ | ✓ |
| Euperciformes    | Leiognathidae   | <i>Karalla daura</i>              | LSUMZ 8791                                      |               | ✓ |   |
| Euperciformes    | Leiognathidae   | <i>Leiognathus equula</i>         | LSUMZ 8683                                      |               | ✓ | ✓ |
| Euperciformes    | Leiognathidae   | <i>Secutor nuconius</i>           | LSUMZ 8682                                      |               | ✓ |   |
| Euperciformes    | Chaetodontidae  | <i>Chaetodon kleinii</i>          | Pers. Coll.: P.Wainwright, PW2291B              | SAMN05915049  | ✓ |   |
| Euperciformes    | Chaetodontidae  | <i>Chaetodon leucopleura</i>      | See NCBI SRA                                    | SAMN09765312  |   |   |

|               |                |                                |                                                                          |              |   |   |
|---------------|----------------|--------------------------------|--------------------------------------------------------------------------|--------------|---|---|
| Euperciformes | Chaetodontidae | <i>Chaetodon melapterus</i>    | See NCBI SRA                                                             | SAMN09765325 |   |   |
| Euperciformes | Chaetodontidae | <i>Chaetodon ocellatus</i>     | CAS CAC01                                                                | SAMN05915050 | ✓ |   |
| Euperciformes | Chaetodontidae | <i>Chaetodon trichrous</i>     | See NCBI SRA                                                             | SAMN09765350 | ✓ | ✓ |
| Euperciformes | Chaetodontidae | <i>Chaetodon trifascialis</i>  | See NCBI SRA                                                             | SAMN09765353 | ✓ |   |
| Euperciformes | Chaetodontidae | <i>Chaetodon unimaculatus</i>  | See NCBI SRA                                                             | SAMN09765358 | ✓ |   |
| Euperciformes | Chaetodontidae | <i>Chaetodon vagabundus</i>    | See NCBI SRA                                                             | SAMN09765361 | ✓ |   |
| Euperciformes | Chaetodontidae | <i>Chaetodon xanthurus</i>     | See NCBI SRA                                                             | SAMN09765364 | ✓ |   |
| Euperciformes | Chaetodontidae | <i>Forcipiger longirostris</i> | See NCBI SRA                                                             | SAMN09765373 | ✓ | ✓ |
| Euperciformes | Chaetodontidae | <i>Heniochus acuminatus</i>    | See NCBI SRA                                                             | SAMN09765375 | ✓ |   |
| Euperciformes | Chaetodontidae | <i>Heniochus diphreutes</i>    | See NCBI SRA                                                             | SAMN09765376 | ✓ |   |
| Euperciformes | Chaetodontidae | <i>Prognathodes aculeatus</i>  | See NCBI SRA                                                             | SAMN09765385 | ✓ | ✓ |
| Euperciformes | Chaetodontidae | <i>Prognathodes marcellae</i>  | See NCBI SRA                                                             | SAMN09765386 | ✓ |   |
| Euperciformes |                | <i>Luvarus imperialis</i>      | MCZ 159566                                                               |              | ✓ |   |
| Euperciformes |                | <i>Zanclus cornutus</i>        | Pers. Coll.: P.Wainwright, PW1782B                                       |              | ✓ |   |
| Euperciformes | Acanthuridae   | <i>Acanthurus bahianus</i>     | ANSP 191513<br>Pers. Coll.:<br>M.Alfaro, Alfaro-                         | SAMN05915021 | ✓ |   |
| Euperciformes | Acanthuridae   | <i>Acanthurus bariene</i>      | 909                                                                      | SAMN05915022 |   |   |
| Euperciformes | Acanthuridae   | <i>Acanthurus chirurgus</i>    | Pers. Coll.: D.Bellwood M1523, n.v.                                      |              | ✓ |   |
| Euperciformes | Acanthuridae   | <i>Acanthurus coeruleus</i>    | Pers. Coll.: D.Bellwood M284, n.v.                                       |              | ✓ |   |
| Euperciformes | Acanthuridae   | <i>Acanthurus lineatus</i>     | Pers. Coll.: D.Bellwood M579, n.v.                                       |              | ✓ |   |
| Euperciformes | Acanthuridae   | <i>Acanthurus nigricans</i>    | Pers. Coll.: D.Bellwood M309, n.v.                                       |              | ✓ |   |
| Euperciformes | Acanthuridae   | <i>Acanthurus nigrofuscus</i>  | Pers. Coll.: D.Bellwood M1452, n.v.<br>Pers. Coll.:<br>M.Alfaro, Alfaro- |              | ✓ |   |
| Euperciformes | Acanthuridae   | <i>Acanthurus olivaceus</i>    | 878<br>Pers. Coll.:<br>M.Alfaro, Alfaro-                                 | SAMN05915023 | ✓ |   |
| Euperciformes | Acanthuridae   | <i>Acanthurus pyroferus</i>    | 907                                                                      | SAMN05915024 | ✓ |   |
| Euperciformes | Acanthuridae   | <i>Acanthurus triostegus</i>   | Pers. Coll.: D.Bellwood M677, n.v.                                       |              | ✓ |   |
| Euperciformes | Acanthuridae   | <i>Ctenochaetus striatus</i>   | Pers. Coll.: D.Bellwood M747, n.v.                                       |              | ✓ |   |
| Euperciformes | Acanthuridae   | <i>Ctenochaetus truncatus</i>  | Pers. Coll.: D.Bellwood M310, n.v.                                       |              |   |   |
| Euperciformes | Acanthuridae   | <i>Naso elegans</i>            | Pers. Coll.: D.Bellwood M1206, n.v.<br>Pers. Coll.:<br>M.Alfaro, Alfaro- |              |   |   |
| Euperciformes | Acanthuridae   | <i>Naso unicornis</i>          | mv010.12                                                                 | SAMN05915088 | ✓ |   |
| Euperciformes | Acanthuridae   | <i>Paracanthurus hepatus</i>   | Pers. Coll.: D.Bellwood M1432, n.v.                                      |              | ✓ |   |
| Euperciformes | Acanthuridae   | <i>Prionurus biafraensis</i>   | Pers. Coll.: D.Bellwood M1695, n.v.                                      |              | ✓ |   |
| Euperciformes | Acanthuridae   | <i>Zebrasoma desjardini</i>    | Pers. Coll.: D.Bellwood M1454, n.v.                                      |              |   |   |
| Euperciformes | Acanthuridae   | <i>Zebrasoma flavescens</i>    | Pers. Coll.: D.Bellwood M2031, n.v.                                      |              | ✓ |   |
| Euperciformes | Acanthuridae   | <i>Zebrasoma rostratum</i>     | Pers. Coll.: D.Bellwood M2030, n.v.<br>NMNZ                              |              |   |   |
| Euperciformes | Callanthiidae  | <i>Callanthias australis</i>   | P.052282/TS2                                                             |              |   |   |
| Euperciformes | Nemipteridae   | <i>Parascolopsis eriomma</i>   | SAIAB 80609                                                              |              | ✓ |   |
| Euperciformes | Nemipteridae   | <i>Scolopsis ghanam</i>        | SAIAB 80378                                                              |              |   |   |

|                   |                 |                                   |                                       |               |   |
|-------------------|-----------------|-----------------------------------|---------------------------------------|---------------|---|
| Euperciformes     | Nemipteridae    | <i>Scolopsis vosmeri</i>          | SAIAB 80713                           |               | ✓ |
| Euperciformes     | Lethrinidae     | <i>Lethrinus erythropterus</i>    | Pers. Coll.: P.Wainwright, PW2049B    |               | ✓ |
| Euperciformes     | Lethrinidae     | <i>Monotaxis grandoculis</i>      | Pers. Coll.: P.Wainwright, PW2159B    |               | ✓ |
| Euperciformes     | Sparidae        | <i>Calamus calamus</i>            | Pers. Coll.: P.Wainwright, PW102: 960 |               | ✓ |
| Euperciformes     | Sparidae        | <i>Pagrus major</i>               | See NCBI SRA                          | SAMD00076252* | ✓ |
| Euperciformes     | Sparidae        | <i>Sparus aurata</i>              | See NCBI SRA                          | SAMN09603368* | ✓ |
| Euperciformes     | Sparidae        | <i>Spicara australis</i>          | SAIAB 81795                           |               |   |
| Euperciformes     | Sparidae        | <i>Spicara smaris</i>             | SAIAB 81064                           |               | ✓ |
| Euperciformes     | Sparidae        | <i>Spondyliosoma cantharus</i>    | See NCBI SRA                          | SAMEA4028822* | ✓ |
| Euperciformes     | Sparidae        | <i>Stenotomus chrysops</i>        | YPM ICH 017360                        |               |   |
| Euperciformes     | <i>Siganus</i>  | <i>Siganus spinus</i>             | KU 4159                               |               | ✓ |
| Euperciformes     | <i>Siganus</i>  | <i>Siganus vulpinus</i>           | Pers. Coll.: P.Wainwright, PW1601     |               | ✓ |
| Euperciformes     | Scatophagidae   | <i>Scatophagus argus</i>          | YPM ICH 020538                        |               | ✓ |
| Euperciformes     | Priacanthidae   | <i>Priacanthus arenatus</i>       | KU 27012                              |               | ✓ |
| Euperciformes     | Cepolidae       | <i>Cepola schlegelii</i>          | ASIZPO 800615                         |               | ✓ |
| Euperciformes     | Cepolidae       | <i>Owstonia tosaensis</i>         | ASIZPO 801455                         |               |   |
| Euperciformes     | Caproidae       | <i>Antigonia capros</i>           | YPM ICH 25915                         | SAMN05915030  | ✓ |
| Tetraodontiformes |                 | <i>Triodon macropterus</i>        | Pers. Coll.: W.L. Smith               |               |   |
| Tetraodontiformes | Aracnidae       | <i>Aracana aurita</i>             | Pers. Coll.: P.Wainwright, PW1285     |               | ✓ |
| Tetraodontiformes | Ostraciidae     | <i>Lactophrys bicaudalis</i>      | YPM ICH 24800                         |               | ✓ |
| Tetraodontiformes | Triacanthodidae | <i>Triacanthodes ethiops</i>      | SAIAB 82125                           |               | ✓ |
| Tetraodontiformes | Triacanthidae   | <i>Triacanthus biaculeatus</i>    | NSMT 59287                            |               | ✓ |
| Tetraodontiformes | Balistidae      | <i>Balistes capriscus</i>         | Pers. Coll.: P.Wainwright, PW2623     | SAMN05915036  | ✓ |
| Tetraodontiformes | Monacanthidae   | <i>Acreichthys tomentosus</i>     | Pers. Coll.: P.Wainwright, PW1740B    |               |   |
| Tetraodontiformes | Monacanthidae   | <i>Aluterus monoceros</i>         | YPM ICH 027566                        |               | ✓ |
| Tetraodontiformes | Molidae         | <i>Masturus lanceolatus</i>       | KU 5252                               |               |   |
| Tetraodontiformes | Molidae         | <i>Mola mola</i>                  | ORIUT 910                             |               |   |
| Tetraodontiformes | Diodontidae     | <i>Chilomycterus schoepfi</i>     | Pers. Coll.: P.Wainwright, PW1225     |               | ✓ |
| Tetraodontiformes | Diodontidae     | <i>Cylichthys orbicularis</i>     | SAIAB 190092                          |               |   |
| Tetraodontiformes | Diodontidae     | <i>Diodon liturosus</i>           | SAIAB 78248                           |               | ✓ |
| Tetraodontiformes | Tetraodontidae  | <i>Canthigaster figueiredoi</i>   | Pers. Coll.: M.Alfaro, Alfaro-491     | SAMN05915041  | ✓ |
| Tetraodontiformes | Tetraodontidae  | <i>Canthigaster margaritata</i>   | CAS LR03                              | SAMN05915042  |   |
| Tetraodontiformes | Tetraodontidae  | <i>Canthigaster rostrata</i>      | CAS CRO42                             | SAMN05915043  | ✓ |
| Tetraodontiformes | Tetraodontidae  | <i>Dichotomycere nigroviridis</i> | See NCBI SRA                          | SAMEA3138311* |   |
| Tetraodontiformes | Tetraodontidae  | <i>Pao suvattii</i>               | Pers. Coll.: M.Alfaro, Alfaro-666     | SAMN05915133  |   |
| Tetraodontiformes | Tetraodontidae  | <i>Takifugu bimaculatus</i>       | See NCBI SRA                          | SAMN10524747* | ✓ |

|                   |                    |                                  |                                                                          |               |   |
|-------------------|--------------------|----------------------------------|--------------------------------------------------------------------------|---------------|---|
| Tetraodontiformes | Tetraodontidae     | <i>Takifugu flavidus</i>         | See NCBI SRA                                                             | SAMN10077091* |   |
| Tetraodontiformes | Tetraodontidae     | <i>Takifugu rubripes</i>         | See NCBI SRA                                                             | SAMEA3138310* | ✓ |
| Lophiiformes      | Lophiidae          | <i>Lophius gastrophysus</i>      | Pers. Coll.: J.Moore, JAM99-109<br>Pers. Coll.:<br>M.Alfaro, Alfaro-1152 |               | ✓ |
| Lophiiformes      | Ogcocephalidae     | <i>Ogcocephalus radiatus</i>     | Pers. Coll.:<br>M.Alfaro, Alfaro-961                                     | SAMN05915090  | ✓ |
| Lophiiformes      | Antennariidae      | <i>Antennarius striatus</i>      | See NCBI SRA                                                             | SAMN05915029  | ✓ |
| Lophiiformes      | Antennariidae      | <i>Antennarius striatus</i>      | See NCBI SRA                                                             | SAMEA4028823* |   |
| Lophiiformes      | Brachionichthyidae | <i>Brachionichthys australis</i> | CSIRO H 4465-01                                                          |               |   |
| Lophiiformes      | Tetrabrachiidae    | <i>Tetrabrachium ocellatum</i>   | UW A50                                                                   |               | ✓ |
| Lophiiformes      | Tetrabrachiidae    | <i>Tetrabrachium ocellatum</i>   | UW A67                                                                   |               |   |
| Lophiiformes      | Chaunacidae        | <i>Chaunax stigmaeus</i>         | MCZ 166061                                                               |               |   |
| Lophiiformes      | Chaunacidae        | <i>Chaunax suttkusi</i>          | MCZ 166070                                                               |               | ✓ |
| Lophiiformes      | Chaunacidae        | <i>Chaunax</i> sp.               | UW 25870<br>NMNZ                                                         |               |   |
| Lophiiformes      | Caulophryniidae    | <i>Caulophryne pelagica</i>      | P.043296/TS3                                                             |               |   |
| Lophiiformes      | Gigantactinidae    | <i>Gigantactis ios</i>           | MCZ 163303                                                               |               |   |
| Lophiiformes      | Gigantactinidae    | <i>Gigantactis vanhoeffeni</i>   | YPM ICH 027791                                                           |               |   |
| Lophiiformes      |                    | <i>Neoceratias spinifer</i>      | UW D17<br>NMNZ                                                           |               |   |
| Lophiiformes      | Linophryniidae     | <i>Haplophryne mollis</i>        | P.041209/TS3                                                             |               |   |
| Lophiiformes      | Ceratiidae         | <i>Cryptosaras couesii</i>       | YPM ICH 25702                                                            | SAMN05915058  | ✓ |
| Lophiiformes      | Oneirodidae        | <i>Chaenophryne longiceps</i>    | YPM ICH 25647                                                            |               |   |
| Lophiiformes      | Oneirodidae        | <i>Dolopichthys karsteni</i>     | MCZ 165969                                                               |               |   |
| Lophiiformes      | Oneirodidae        | <i>Lasiognathus intermedius</i>  | YPM ICH 25927                                                            |               |   |
| Lophiiformes      | Diceratiidae       | <i>Bufoceratias thele</i>        | UW D6                                                                    |               |   |
| Lophiiformes      | Diceratiidae       | <i>Diceratias pileatus</i>       | UW D7                                                                    |               |   |
| Lophiiformes      | Diceratiidae       | <i>Diceratias</i> sp.            | UW D27                                                                   |               |   |
| Lophiiformes      | Himantolophidae    | <i>Himantolophus albinareus</i>  | MCZ 161521                                                               |               |   |
| Lophiiformes      | Himantolophidae    | <i>Himantolophus sagamius</i>    | SIO 02-2                                                                 |               |   |
| Lophiiformes      | Melanocetidae      | <i>Melanocetus johnsonii</i>     | UW 115879                                                                |               | ✓ |
| Lophiiformes      | Melanocetidae      | <i>Melanocetus murrayi</i>       | YPM ICH 027583                                                           |               | ✓ |

092

093

094

095

096

097

098

099

Institutional Abbreviations: AMNH, American Museum of Natural History, New York; AMS, Australian Museum, Sydney; ANSP, Academy of Natural Sciences, Philadelphia; ASIZ, Academia Sinica, Biodiversity Research Museum, Taipei; CAS, California Academy of Sciences, San Francisco; CBM, Natural History Museum and Institute, Chiba; CSIRO, Commonwealth Scientific and Industrial Research Organisation, Division of Marine and Atmospheric Research, Australian National Fish Collection, Hobart; CUMV, Cornell University Museum of Vertebrates, Ithaca; FAKU, Kyoto University Museum, Kyoto University, Yoshida, Sakyo; FMNH, Field Museum of Natural History, Chicago; FRLM, Fish Collection of the Fisheries Research

100 Laboratory, Mie University, Wagu, Shima; HUMZ, The Hokkaido University Museum, Sapporo; INHS, Illinois  
101 Natural History Survey, Champaign; KAUM, Kagoshima University Museum, Korimoto; KU, University of  
102 Kansas Biodiversity Institute, Lawrence; LACM, Natural History Museum of Los Angeles County, Los  
103 Angeles; LBP, Laboratório de Biologia e Genética de Peixes, Departamento de Morfologia, Universidade  
104 Estadual Paulista “Júlio de Mesquita Filho”, Campus de Rio Claro, São Paulo; LSUMZ, Louisiana Museum of  
105 Natural History, Baton Rouge; MCZ, Museum of Comparative Zoology, Harvard University, Cambridge,  
106 Massachusetts; MNCN, Museo Nacional de Ciencias Naturales (CSIC), Madrid; MNHN, Museo Nacional de  
107 Historia Natural, Zoología, Santiago; NCSM, North Carolina Museum of Natural Sciences, Raleigh; NMND,  
108 National Museum of Natural History, New Delhi; NMNZ, Museum of New Zealand Te Papa Tongarewa,  
109 Wellington; NMV, Museum Victoria, Melbourne; NSMT, National Museum of Nature and Science, Ueno Park,  
110 Tokyo; NTM, Museums and Art Galleries of the Northern Territory, Darwin; ORIUT, University of Tokyo,  
111 Ocean Research Institute, Tokyo; QM, Queensland Museum, Centre for Biodiversity, Brisbane; ROM, Royal  
112 Ontario Museum, Department of Natural History, Toronto; SAIAB, South African Institute for Aquatic  
113 Biodiversity, Grahamstown; SAMA, South Australian Museum, Adelaide; SIO, Scripps Institution of  
114 Oceanography, Marine Vertebrate Collection, University of California, San Diego, La Jolla; SLU, Southeastern  
115 Louisiana University, Museum of Biology, Hammond; SNFR, Seikai National Fisheries Research Institute,  
116 Nagasaki; UF, University of Florida, Florida Museum of Natural History, Gainesville; USNM, National  
117 Museum of Natural History, Smithsonian Institution, Department of Vertebrate Zoology, Washington, D.C.; UT,  
118 University of Tennessee, Department of Ecology and Evolutionary Biology, David A. Etnier Ichthyological  
119 Collection, Knoxville; UW, University of Washington, Burke Museum of Natural History and Culture, Seattle;  
120 YFTC, Yale Fish Tissue Collection, Department of Ecology and Evolutionary Biology, Yale University, New  
121 Haven; YPM, Yale University, Peabody Museum of Natural History, New Haven; ZMUB, Universitetsmuseet i  
122 Bergen, Bergen, Hordaland; ZMUC, Zoological Museum, University of Copenhagen, Copenhagen.

123 **Supplementary Table 2: Summary of TOPD pairwise comparisons of tree topologies inferred using**  
 124 **different methods.**

|                                            | 702-taxon trees                         |                                    | 1,084-taxon trees              |                                |
|--------------------------------------------|-----------------------------------------|------------------------------------|--------------------------------|--------------------------------|
|                                            | Multiple-partition vs<br>IQ-TREEsingle* | IQ-TREEsingle* vs<br>IQ-TREEmulti† | IQ-TREEsingle* vs<br>RAxML     | IQ-TREEmulti† vs<br>RAxML      |
|                                            | <i>Acanthistius cinctus</i>             | <i>Acanthistius cinctus</i>        | <i>Acanthistius cinctus</i>    | <i>Apogon affinis</i>          |
|                                            | <i>Arripis trutta</i>                   | <i>Acanthurus triostegus</i>       | <i>Acanthurus triostegus</i>   | <i>Astrapogon stellatus</i>    |
|                                            | <i>Chloroscombrus orqueta</i>           | <i>Icosteus aenigmaticus</i>       | <i>Apogon affinis</i>          | <i>Cryptopsaras couesii</i>    |
|                                            | <i>Icosteus aenigmaticus</i>            |                                    | <i>Astrapogon stellatus</i>    | <i>Ectodus descampsii</i>      |
|                                            | <i>Lycodes concolor</i>                 |                                    | <i>Cryptopsaras couesii</i>    | <i>Haplotaxodon microlepis</i> |
|                                            | <i>Pomatomus saltatrix</i>              |                                    | <i>Ectodus descampsii</i>      | <i>Nomorhamphus celebensis</i> |
|                                            | <i>Pseudanthias squamipinnis</i>        |                                    | <i>Haplotaxodon microlepis</i> | <i>Phaeoptyx pigmentaria</i>   |
|                                            | <i>Selaroides leptolepis</i>            |                                    | <i>Icosteus aenigmaticus</i>   | <i>Xenentodon cancila</i>      |
|                                            | <i>Sillago sihama</i>                   |                                    | <i>Nomorhamphus celebensis</i> | <i>Zenarchopterus dispar</i>   |
|                                            |                                         |                                    | <i>Phaeoptyx pigmentaria</i>   |                                |
|                                            |                                         |                                    | <i>Xenentodon cancila</i>      |                                |
|                                            |                                         |                                    | <i>Zenarchopterus dispar</i>   |                                |
| <b>Robinson-Foulds split<br/>distances</b> | 0.033                                   | 0.006                              | 0.012                          | 0.007                          |
| <b># Disagreeing Splits / Total</b>        | 46 / 1398                               | 14 / 2212                          | 26 / 2212                      | 16 / 2212                      |
| <b>Nodal distance</b>                      | 1.05                                    | 0.49                               | 0.61                           | 0.51                           |

125 \*IQ-TREEsingle = tree resulting from an IQ-TREE analysis using an unpartitioned alignment  
 126 † “IQ-TREEmulti = tree resulting from an IQ-TREE analysis using the ModelFinder Plus option  
 127 Columns list taxa with different phylogenetic positions among the compared trees. Robinson-Foulds split  
 128 distances, the number of disagreeing splits, and nodal distances are provided at the bottom of each column. All  
 129 RAxML-ng analyses were performed on multiple-partition alignments that were partitioned with PartionFinder2.  
 130 The topologies of the 702-taxon trees inferred using multiple-partition alignments in IQ-TREE and RAxML-ng  
 131 were identical.  
 132

133  
 134  
 135  
 136  
 137  
 138

139 **Supplementary Table 3: Classification of Acanthomorpha.** The number of species in each taxonomic order  
 140 is offered in the second column. Though every family is classified in an order, not every family is classified in a  
 141 suborder or superfamily.

| Order            | Number of species | Suborder-Superfamily | Family                                                                                                                                                                                                                                                                 |
|------------------|-------------------|----------------------|------------------------------------------------------------------------------------------------------------------------------------------------------------------------------------------------------------------------------------------------------------------------|
| Polymixiiformes  | 10                |                      | Polymixiidae                                                                                                                                                                                                                                                           |
| Percopsiformes   | 12                |                      | Amblyopsidae<br>Aphredoderidae<br>Percopsidae                                                                                                                                                                                                                          |
| Zeiformes        | 33                |                      | Cyttidae<br>Grammicolepididae<br>Oreosomatidae<br>Parazenidae<br>Zeidae<br>Zeniontidae                                                                                                                                                                                 |
| Stylephoriformes | 1                 |                      | Stylephoridae                                                                                                                                                                                                                                                          |
| Gadiformes       | 615               |                      | Bathygadidae<br>Bregmacerotidae<br>Eulichthyidae<br>Gadidae<br>Gaidropsaridae<br>Lotidae<br>Lyconidae<br>Macrouridae<br>Macruronidae<br>Melanonidae<br>Merlucciidae<br>Moridae<br>Muraenolepididae<br>Phycidae<br>Ranicipitidae<br>Steindachneriidae<br>Trachyrincidae |
| Lampriformes     | 29                |                      |                                                                                                                                                                                                                                                                        |



|                            |           |                     |
|----------------------------|-----------|---------------------|
|                            |           | Lampridae           |
|                            |           | Lophotidae          |
|                            |           | Radiicephalidae     |
|                            |           | Regalecidae         |
|                            |           | Trachipteridae      |
|                            |           | Veliferidae         |
| Trachichthyiformes         | 66        |                     |
|                            |           | Anomalopidae        |
|                            |           | Anoplogasteridae    |
|                            |           | Diretmidae          |
|                            |           | Monocentridae       |
|                            |           | Trachichthyidae     |
| Beryciformes               | 211       |                     |
|                            |           | Holocentridae       |
|                            |           | Rondeletiidae       |
|                            |           | Stephanoberycidae   |
|                            |           | Barbourisiidae      |
|                            |           | Cetomimidae         |
|                            |           | Berycidae           |
|                            |           | Melamphaidae        |
|                            |           | Gibberichthyidae    |
|                            |           | Hispidoberycidae    |
| Ophidiiformes              | 545       |                     |
|                            |           | Bythitidae          |
|                            |           | Dinematichthyidae   |
|                            |           | Ophidiidae          |
| Batrachoidiformes          | 84        |                     |
|                            |           | Batrachoididae      |
| Gobiiformes<br>(=Gobiaria) | 2,638     |                     |
|                            | Gobioidei | Rhyacichthyidae     |
|                            | Gobioidei | Odontobutidae       |
|                            | Gobioidei | Butidae             |
|                            | Gobioidei | Eleotridae          |
|                            | Gobioidei | Milyeringidae       |
|                            | Gobioidei | Thalasseleotrididae |
|                            | Gobioidei | Oxudercidae         |
|                            | Gobioidei | Gobiidae            |

|                                    |       |                |                   |
|------------------------------------|-------|----------------|-------------------|
|                                    |       |                | Trichonotidae     |
|                                    |       |                | Kurtidae          |
|                                    |       |                | Apogonidae        |
| Scombriformes<br>(=Pelagiaria)     | 285   |                |                   |
|                                    |       |                | Amarsipidae       |
|                                    |       |                | Ariommatidae      |
|                                    |       |                | Arripidae         |
|                                    |       |                | Bramidae          |
|                                    |       |                | Caristiidae       |
|                                    |       |                | Centrolophidae    |
|                                    |       |                | Chiasmodontidae   |
|                                    |       |                | Gempylidae        |
|                                    |       |                | Icosteidae        |
|                                    |       |                | Lepidocybidae     |
|                                    |       |                | Nomeidae          |
|                                    |       |                | Pomatomidae       |
|                                    |       |                | Scombridae        |
|                                    |       |                | Scombrolabracidae |
|                                    |       |                | Stromateidae      |
|                                    |       |                | Tetragonuridae    |
|                                    |       |                | Trichiuridae      |
| Syngnathiformes<br>(=Syngnatharia) | 674   |                |                   |
|                                    |       | Syngnathoidei  | Aulostomidae      |
|                                    |       | Syngnathoidei  | Centriscidae      |
|                                    |       | Syngnathoidei  | Macroramphosidae  |
|                                    |       | Syngnathoidei  | Fistularidae      |
|                                    |       | Syngnathoidei  | Solenostomidae    |
|                                    |       | Syngnathoidei  | Syngnathidae      |
|                                    |       | Syngnathoidei  | Pegasidae         |
|                                    |       | Callionymoidei | Callionymidae     |
|                                    |       | Callionymoidei | Draconettidae     |
|                                    |       |                | Mullidae          |
|                                    |       |                | Dactylopteridae   |
| Blenniiformes<br>(=Ovalentaria)    | 5,865 |                |                   |
|                                    |       | Blennioidei    | Blenniidae        |

|                               |                  |
|-------------------------------|------------------|
| Blennioidei                   | Chaenopsidae     |
| Blennioidei                   | Clinidae         |
| Blennioidei                   | Dactyloscopidae  |
| Blennioidei                   | Gobiesocidae     |
| Blennioidei                   | Labrisomidae     |
| Blennioidei                   | Tripterygiidae   |
| Atherinoidei-Belonoidea       | Adrianichthyidae |
| Atherinoidei-Belonoidea       | Belonidae        |
| Atherinoidei-Belonoidea       | Exocoetidae      |
| Atherinoidei-Belonoidea       | Hemiramphidae    |
| Atherinoidei-Cyprinodontoidea | Anablepidae      |
| Atherinoidei-Cyprinodontoidea | Aphaniidae       |
| Atherinoidei-Cyprinodontoidea | Aplocheilidae    |
| Atherinoidei-Cyprinodontoidea | Rivulidae        |
| Atherinoidei-Cyprinodontoidea | Cyprinodontidae  |
| Atherinoidei-Cyprinodontoidea | Fluviphylacidae  |
| Atherinoidei-Cyprinodontoidea | Fundulidae       |
| Atherinoidei-Cyprinodontoidea | Goodeidae        |
| Atherinoidei-Cyprinodontoidea | Nothobranchiidae |
| Atherinoidei-Cyprinodontoidea | Pantodontidae    |
| Atherinoidei-Cyprinodontoidea | Poeciliidae      |
| Atherinoidei-Cyprinodontoidea | Profundulidae    |
| Atherinoidei-Cyprinodontoidea | Procatopodidae   |
| Atherinoidei-Cyprinodontoidea | Valenciidae      |
| Atherinoidei-Atherinoidea     | Atherinidae      |
| Atherinoidei-Atherinoidea     | Atherinopsidae   |
| Atherinoidei-Atherinoidea     | Atherionidae     |
| Atherinoidei-Atherinoidea     | Bedotiidae       |
| Atherinoidei-Atherinoidea     | Dentatherinidae  |
| Atherinoidei-Atherinoidea     | Isonidae         |
| Atherinoidei-Atherinoidea     | Melanotaeniidae  |
| Atherinoidei-Atherinoidea     | Phallostethidae  |
| Atherinoidei-Atherinoidea     | Pseudomugilidae  |
| Atherinoidei-Atherinoidea     | Telmatherinidae  |
| Cichloidei                    | Cichlidae        |
| Cichloidei                    | Pholidichthyidae |
|                               | Ambassidae       |
|                               | Embiotocidae     |

|                                    |       |                                 |                 |
|------------------------------------|-------|---------------------------------|-----------------|
|                                    |       |                                 | Grammatidae     |
|                                    |       |                                 | Mugilidae       |
|                                    |       |                                 | Opistognathidae |
|                                    |       |                                 | Plesiopidae     |
|                                    |       |                                 | Polycentridae   |
|                                    |       |                                 | Pomacentridae   |
|                                    |       |                                 | Pseudochromidae |
|                                    |       |                                 | Congrogadidae   |
|                                    |       |                                 | Plesiopidae     |
| Synbranchiformes<br>(=Anabantaria) | 400   |                                 |                 |
|                                    |       | Synbranchoidei                  | Indostomidae    |
|                                    |       | Synbranchoidei                  | Synbranchidae   |
|                                    |       | Synbranchoidei                  | Chaudhuriidae   |
|                                    |       | Synbranchoidei                  | Mastacembelidae |
|                                    |       | Anabantoidei                    | Anabantidae     |
|                                    |       | Anabantoidei                    | Helostomatidae  |
|                                    |       | Anabantoidei                    | Osphronemidae   |
|                                    |       | Anabantoidei                    | Channidae       |
|                                    |       | Anabantoidei                    | Badidae         |
|                                    |       | Anabantoidei                    | Nandidae        |
|                                    |       | Anabantoidei                    | Pristolepididae |
| Carangiformes<br>(=Carangaria)     | 1,100 |                                 |                 |
|                                    |       | Carangoidei-Carangoidea         | Carangidae      |
|                                    |       | Carangoidei-Carangoidea         | Trachinotidae   |
|                                    |       | Carangoidei-Carangoidea         | Coryphaenidae   |
|                                    |       | Carangoidei-Carangoidea         | Echeneidae      |
|                                    |       | Carangoidei-Carangoidea         | Rachycentridae  |
|                                    |       | Carangoidei-Xiphoidea           | Istiophoridae   |
|                                    |       | Carangoidei-Xiphoidea           | Xiphiidae       |
|                                    |       | Carangoidei                     | Leptobramidae   |
|                                    |       | Carangoidei                     | Menidae         |
|                                    |       | Carangoidei                     | Nemastiidae     |
|                                    |       | Carangoidei                     | Toxotidae       |
|                                    |       | Pleuronectoidei                 | Psettodidae     |
|                                    |       | Pleuronectoidei-Pleuronectoidea | Achiridae       |

|             |       |                                 |                  |
|-------------|-------|---------------------------------|------------------|
|             |       | Pleuronectoidei-Pleuronectoidea | Achiropsettidae  |
|             |       | Pleuronectoidei-Pleuronectoidea | Bothidae         |
|             |       | Pleuronectoidei-Pleuronectoidea | Citharidae       |
|             |       | Pleuronectoidei-Pleuronectoidea | Cyclopsettidae   |
|             |       | Pleuronectoidei-Pleuronectoidea | Cynoglossidae    |
|             |       | Pleuronectoidei-Pleuronectoidea | Oncopteridae     |
|             |       | Pleuronectoidei-Pleuronectoidea | Paralichthyidae  |
|             |       | Pleuronectoidei-Pleuronectoidea | Paralichthodidae |
|             |       | Pleuronectoidei-Pleuronectoidea | Pleuronectidae   |
|             |       | Pleuronectoidei-Pleuronectoidea | Poecilopsettidae |
|             |       | Pleuronectoidei-Pleuronectoidea | Rhombosoleidae   |
|             |       | Pleuronectoidei-Pleuronectoidea | Samaridae        |
|             |       | Pleuronectoidei-Pleuronectoidea | Scophthalmidae   |
|             |       | Pleuronectoidei-Pleuronectoidea | Soleidae         |
|             |       |                                 | Centropomidae    |
|             |       |                                 | Lactariidae      |
|             |       |                                 | Polynemidae      |
|             |       |                                 | Sphyaenidae      |
| Perciformes | 3,192 |                                 |                  |
|             |       | Percoidei                       | Percidae         |
|             |       | Percoidei                       | Trachinidae      |
|             |       | Percoidei                       | Niphonidae       |
|             |       |                                 | Epinephelidae    |
|             |       |                                 | Grammistidae     |
|             |       |                                 | Liopropomatidae  |
|             |       |                                 | Serranidae       |
|             |       |                                 | Anthiidae        |
|             |       |                                 | Bembropidae      |
|             |       | Notothenioidei                  | Percophidae      |
|             |       | Notothenioidei                  | Bovichtidae      |
|             |       | Notothenioidei                  | Pseudaphritidae  |
|             |       | Notothenioidei                  | Eleginopsidae    |
|             |       | Notothenioidei                  | Artedidraconidae |
|             |       | Notothenioidei                  | Bathydraconidae  |
|             |       | Notothenioidei                  | Channichthyidae  |
|             |       | Notothenioidei                  | Harpagiferidae   |
|             |       | Notothenioidei                  | Nototheniidae    |
|             |       | Scorpaenoidei                   | Platycephalidae  |

|               |                    |
|---------------|--------------------|
| Scorpaenoidei | Bembridae          |
| Scorpaenoidei | Congiopodidae      |
| Scorpaenoidei | Neosebastidae      |
| Scorpaenoidei | Hoplichthyidae     |
| Scorpaenoidei | Normanichthyidae   |
| Scorpaenoidei | Synanceiidae       |
| Scorpaenoidei | Triglidae          |
| Scorpaenoidei | Scorpaenidae       |
| Scorpaenoidei | Anoplopomatidae    |
| Scorpaenoidei | Hexagrammidae      |
| Scorpaenoidei | Zaniolepididae     |
| Scorpaenoidei | Trichodontidae     |
| Scorpaenoidei | Cyclopteridae      |
| Scorpaenoidei | Liparidae          |
| Scorpaenoidei | Scorpaenichthyidae |
| Scorpaenoidei | Agonidae           |
| Scorpaenoidei | Cottidae           |
| Scorpaenoidei | Psychrolutidae     |
| Scorpaenoidei | Rhamphocottidae    |
| Scorpaenoidei | Anarhichadidae     |
| Scorpaenoidei | Bathymasteridae    |
| Scorpaenoidei | Cryptacanthodidae  |
| Scorpaenoidei | Pholidae           |
| Scorpaenoidei | Ptilichthyidae     |
| Scorpaenoidei | Scytalinidae       |
| Scorpaenoidei | Stichaeidae        |
| Scorpaenoidei | Zaproridae         |
| Scorpaenoidei | Eulophiidae        |
| Scorpaenoidei | Opisthocentridae   |
| Scorpaenoidei | Lumpenidae         |
| Scorpaenoidei | Neozoarcidae       |
| Scorpaenoidei | Zoarcidae          |
| Scorpaenoidei | Aulorhynchidae     |
| Scorpaenoidei | Gasterosteidae     |
| Scorpaenoidei | Hypoptychidae      |

|                  |     |                |                    |
|------------------|-----|----------------|--------------------|
|                  |     |                | Cheilodactylidae   |
|                  |     |                | Chironemidae       |
|                  |     |                | Cirrhitidae        |
|                  |     |                | Dichistiidae       |
|                  |     |                | Enoplosidae        |
|                  |     |                | Girellidae         |
|                  |     |                | Kuhliidae          |
|                  |     |                | Kyphosidae         |
|                  |     |                | Microcanthidae     |
|                  |     |                | Scorpididae        |
|                  |     |                | Latridae           |
|                  |     |                | Oplegnathidae      |
|                  |     |                | Percichthyidae     |
|                  |     |                | Sinipercidae       |
|                  |     |                | Terapontidae       |
| Labriiformes     | 757 |                |                    |
|                  |     | Labroidei      | Labridae           |
|                  |     | Labroidei      | Centrogenyidae     |
|                  |     | Uranoscopoidei | Uranoscopidae      |
|                  |     | Uranoscopoidei | Cheimarrichthyidae |
|                  |     | Uranoscopoidei | Pinguipedidae      |
|                  |     | Uranoscopoidei | Ammodytidae        |
|                  |     | Uranoscopoidei | Leptoscopidae      |
| Acropomatiformes | 308 |                |                    |
|                  |     |                | Acropomatidae      |
|                  |     |                | Banjosidae         |
|                  |     |                | Bathyclupeidae     |
|                  |     |                | Champsodontidae    |
|                  |     |                | Creediidae         |
|                  |     |                | Dinolestidae       |
|                  |     |                | Epigonidae         |
|                  |     |                | Glaucosomatidae    |
|                  |     |                | Hemerocoetidae     |
|                  |     |                | Howellidae         |
|                  |     |                | Lateolabracidae    |
|                  |     |                | Leptoscopidae      |
|                  |     |                | Malakichthyidae    |
|                  |     |                | Ostracoberycidae   |

|                 |       |               |                    |
|-----------------|-------|---------------|--------------------|
|                 |       |               | Pempheridae        |
|                 |       |               | Pentacerotidae     |
|                 |       |               | Polyprionidae      |
|                 |       |               | Stereolepidae      |
|                 |       |               | Scombropidae       |
|                 |       |               | Synagropidae       |
|                 |       |               | Symphysanodontidae |
| Acanthuriformes | 2,350 |               |                    |
|                 |       | Acanthuroidei | Acanthuridae       |
|                 |       | Acanthuroidei | Zanclidae          |
|                 |       | Acanthuroidei | Luvaridae          |
|                 |       |               | Gerreidae          |
|                 |       |               | Moronidae          |
|                 |       |               | Sillaginidae       |
|                 |       |               | Drepaneidae        |
|                 |       |               | Ephippidae         |
|                 |       |               | Dinopercidae       |
|                 |       |               | Haemulidae         |
|                 |       |               | Sciaenidae         |
|                 |       |               | Monodactylidae     |
|                 |       |               | Lobotidae          |
|                 |       |               | Emmelichthyidae    |
|                 |       |               | Lutjanidae         |
|                 |       |               | Malacanthidae      |
|                 |       |               | Pomacanthidae      |
|                 |       |               | Leiognathidae      |
|                 |       |               | Chaetodontidae     |
|                 |       |               | Callanthiidae      |
|                 |       |               | Lethrinidae        |
|                 |       |               | Nemipteridae       |
|                 |       |               | Sparidae           |
|                 |       |               | Siganidae          |
|                 |       |               | Scatophagidae      |
|                 |       |               | Priacanthidae      |
|                 |       |               | Cepolidae          |
|                 |       |               | Caproidae          |
|                 |       | Lophioidei    | Antennariidae      |
|                 |       | Lophioidei    | Brachionichthyidae |



|                 |                 |
|-----------------|-----------------|
| Lophioidei      | Caulophrynidae  |
| Lophioidei      | Centrophrynidae |
| Lophioidei      | Ceratiidae      |
| Lophioidei      | Chaunacidae     |
| Lophioidei      | Diceratiidae    |
| Lophioidei      | Gigantactinidae |
| Lophioidei      | Himantolophidae |
| Lophioidei      | Linophrynidae   |
| Lophioidei      | Lophichthyidae  |
| Lophioidei      | Lophiidae       |
| Lophioidei      | Melanocetidae   |
| Lophioidei      | Neoceratiidae   |
| Lophioidei      | Ogcocephalidae  |
| Lophioidei      | Oneirodidae     |
| Lophioidei      | Tetrabrachiidae |
| Tetraodontoidei | Aracanidae      |
| Tetraodontoidei | Balistidae      |
| Tetraodontoidei | Diodontidae     |
| Tetraodontoidei | Molidae         |
| Tetraodontoidei | Monacanthidae   |
| Tetraodontoidei | Ostraciidae     |
| Tetraodontoidei | Tetraodontidae  |
| Tetraodontoidei | Triacanthidae   |
| Tetraodontoidei | Triacanthodidae |
| Tetraodontoidei | Triodontidae    |

---

142

143

144 **Supplementary Table 4: Divergence date estimates in millions of years (Mya) and 95% Highest Posterior**  
 145 **Densities (HPD) for major acanthomorph clades, generated using six alignments of 30 UCE loci in**  
 146 **BEAST.** Estimates from the 702-taxon and 1,084-taxon time trees are both represented. All stem and crown  
 147 ages are calculated from median node heights.

| Clade                 | # of Taxa | Loci Set      | Stem Age (Mya) | Stem 95% HPD (Mya) | Crown Age (Mya) | Crown 95% HPD (Mya) |
|-----------------------|-----------|---------------|----------------|--------------------|-----------------|---------------------|
| <b>Lampriformes</b>   | 1,084     | 30 loci set A | 131.28         | [112.28, 145.67]   | 58.09           | [55.84, 69.71]      |
|                       |           | 30 loci set B | 134.87         | [117.46, 147.27]   | 57.83           | [55.82, 67.74]      |
|                       |           | 30 loci set C | 133.75         | [116.00, 146.56]   | 58.15           | [55.82, 72.19]      |
|                       | 702       | 30 loci set D | 133.07         | [115.53, 145.96]   | 57.90           | [55.83, 69.38]      |
|                       |           | 30 loci set E | 137.30         | [123.25, 147.73]   | 57.99           | [55.81, 69.90]      |
|                       |           | 30 loci set F | 137.28         | [119.55, 152.47]   | 57.90           | [55.81, 69.26]      |
| <b>Polymixia</b>      | 1,084     | 30 loci set A | 96.79          | [93.96, 108.22]    |                 |                     |
|                       |           | 30 loci set B | 98.33          | [93.99, 120.28]    |                 |                     |
|                       |           | 30 loci set C | 97.52          | [93.96, 112.48]    |                 |                     |
|                       | 702       | 30 loci set D | 97.16          | [93.94, 111.95]    |                 |                     |
|                       |           | 30 loci set E | 96.69          | [93.92, 108.91]    |                 |                     |
|                       |           | 30 loci set F | 96.77          | [93.93, 109.90]    |                 |                     |
| <b>Percopsiformes</b> | 1,084     | 30 loci set A | 96.79          | [93.96, 108.22]    | 53.54           | [40.12, 72.36]      |
|                       |           | 30 loci set B | 98.33          | [93.99, 120.28]    | 53.04           | [38.36, 71.85]      |
|                       |           | 30 loci set C | 97.52          | [93.96, 112.48]    | 54.02           | [39.34, 75.18]      |
|                       | 702       | 30 loci set D | 97.16          | [93.94, 111.95]    | 36.57           | [34.12, 51.86]      |
|                       |           | 30 loci set E | 96.69          | [93.92, 108.91]    | 36.34           | [34.12, 46.72]      |
|                       |           | 30 loci set F | 96.77          | [93.93, 109.90]    | 36.40           | [34.12, 47.56]      |
| <b>Zeiformes</b>      | 1,084     | 30 loci set A | 105.92         | [88.81, 122.96]    | 49.98           | [37.33, 72.02]      |
|                       |           | 30 loci set B | 109.87         | [94.35, 129.43]    | 54.86           | [38.88, 77.00]      |
|                       |           | 30 loci set C | 109.41         | [94.58, 125.37]    | 50.10           | [37.46, 66.39]      |
|                       | 702       | 30 loci set D | 108.97         | [92.86, 124.77]    | 50.09           | [36.68, 72.93]      |
|                       |           | 30 loci set E | 112.40         | [97.33, 127.83]    | 52.23           | [36.27, 73.79]      |
|                       |           | 30 loci set F | 110.89         | [87.82, 127.33]    | 54.95           | [40.48, 79.84]      |
| <b>Stylephorus</b>    | 1,084     | 30 loci set A | 88.48          | [72.87, 105.39]    |                 |                     |
|                       |           | 30 loci set B | 92.97          | [75.31, 112.39]    |                 |                     |
|                       |           | 30 loci set C | 94.55          | [79.52, 110.80]    |                 |                     |
|                       | 702       | 30 loci set D | 94.04          | [78.07, 110.29]    |                 |                     |
|                       |           | 30 loci set E | 97.74          | [82.02, 113.36]    |                 |                     |
|                       |           | 30 loci set F | 93.74          | [73.39, 112.47]    |                 |                     |

|                           |              |                      |              |                        |              |                       |
|---------------------------|--------------|----------------------|--------------|------------------------|--------------|-----------------------|
| <b>Gadiformes</b>         | <b>1,084</b> | <b>30 loci set A</b> | <b>88.48</b> | <b>[72.87, 105.39]</b> | <b>77.01</b> | <b>[61.50, 92.18]</b> |
|                           |              | 30 loci set B        | 92.97        | [75.31, 112.39]        | 79.22        | [63.54, 97.57]        |
|                           |              | 30 loci set C        | 94.55        | [79.52, 110.80]        | 81.29        | [65.42, 97.97]        |
|                           | 702          | 30 loci set D        | 94.04        | [78.07, 110.29]        | 87.13        | [71.95, 103.23]       |
|                           |              | 30 loci set E        | 97.74        | [82.02, 113.36]        | 84.64        | [68.98, 99.22]        |
|                           |              | 30 loci set F        | 93.74        | [73.39, 112.47]        | 80.19        | [60.80, 99.93]        |
| <b>Trachichthyiformes</b> | 1,084        | 30 loci set A        | 137.42       | [129.12, 147.30]       | 46.58        | [24.68, 75.50]        |
|                           |              | 30 loci set B        | 136.40       | [127.79, 144.74]       | 42.47        | [24.82, 72.22]        |
|                           |              | 30 loci set C        | 138.07       | [129.74, 145.62]       | 44.99        | [25.20, 78.24]        |
|                           | 702          | 30 loci set D        | 138.73       | [129.73, 147.16]       | 46.53        | [20.28, 78.59]        |
|                           |              | 30 loci set E        | 138.45       | [129.72, 147.34]       | 46.02        | [23.89, 77.49]        |
|                           |              | 30 loci set F        | 138.55       | [125.63, 151.42]       | 51.89        | [27.55, 90.99]        |
| <b>Beryciformes</b>       | 1,084        | 30 loci set A        | 132.91       | [123.97, 143.13]       | 100.57       | [98.23, 107.44]       |
|                           |              | 30 loci set B        | 132.29       | [122.95, 141.24]       | 100.35       | [98.28, 107.45]       |
|                           |              | 30 loci set C        | 133.93       | [126.23, 141.83]       | 100.57       | [98.35, 107.08]       |
|                           | 702          | 30 loci set D        | 134.77       | [126.10, 144.04]       | 100.69       | [98.18, 108.19]       |
|                           |              | 30 loci set E        | 134.80       | [125.53, 143.44]       | 100.70       | [98.18, 108.29]       |
|                           |              | 30 loci set F        | 134.23       | [116.61, 148.64]       | 100.69       | [98.17, 108.06]       |
| <b>Ophidiiformes</b>      | 1,084        | 30 loci set A        | 126.76       | [116.96, 135.68]       | 84.50        | [59.31, 111.29]       |
|                           |              | 30 loci set B        | 126.31       | [117.66, 135.78]       | 88.86        | [66.89, 115.30]       |
|                           |              | 30 loci set C        | 127.63       | [120.65, 136.57]       | 92.32        | [65.49, 115.42]       |
|                           | 702          | 30 loci set D        | 128.36       | [119.08, 137.65]       | 85.49        | [57.95, 115.91]       |
|                           |              | 30 loci set E        | 127.61       | [117.49, 137.46]       | 83.87        | [58.20, 110.70]       |
|                           |              | 30 loci set F        | 127.09       | [105.34, 141.44]       | 80.24        | [53.46, 114.16]       |
| <b>Batrachoididae</b>     | 1,084        | 30 loci set A        | 121.85       | [113.37, 130.94]       | 49.09        | [25.28, 76.27]        |
|                           |              | 30 loci set B        | 121.66       | [111.66, 130.20]       | 50.84        | [29.93, 78.15]        |
|                           |              | 30 loci set C        | 123.25       | [114.82, 130.23]       | 43.56        | [23.91, 70.03]        |
|                           | 702          | 30 loci set D        | 123.43       | [114.13, 133.12]       | 43.41        | [19.20, 76.30]        |
|                           |              | 30 loci set E        | 123.23       | [113.51, 133.45]       | 43.46        | [18.07, 75.89]        |
|                           |              | 30 loci set F        | 121.76       | [104.77, 139.03]       | 50.55        | [27.08, 83.20]        |
| <b>Gobiiformes</b>        | 1,084        | 30 loci set A        | 117.81       | [108.89, 126.63]       | 109.64       | [98.88, 119.95]       |
|                           |              | 30 loci set B        | 118.22       | [107.12, 126.70]       | 111.01       | [99.69, 121.14]       |
|                           |              | 30 loci set C        | 119.73       | [111.67, 127.22]       | 112.57       | [103.28, 121.44]      |
|                           | 702          | 30 loci set D        | 119.80       | [110.41, 129.24]       | 111.76       | [100.58, 122.53]      |
|                           |              | 30 loci set E        | 119.71       | [108.92, 129.01]       | 111.91       | [99.63, 122.86]       |
|                           |              | 30 loci set F        | 117.80       | [97.66, 132.04]        | 110.32       | [94.89, 124.32]       |
| <b>Syngnathiformes</b>    | 1,084        | 30 loci set A        | 110.30       | [101.51, 120.65]       | 104.59       | [95.01, 114.75]       |

|                         |       |               |        |                  |        |                 |
|-------------------------|-------|---------------|--------|------------------|--------|-----------------|
|                         |       | 30 loci set B | 110.65 | [97.59, 119.08]  | 104.49 | [93.39, 114.84] |
|                         |       | 30 loci set C | 111.82 | [101.46, 120.96] | 105.30 | [92.93, 115.32] |
|                         | 702   | 30 loci set D | 109.82 | [99.69, 119.86]  | 102.66 | [91.04, 112.38] |
|                         |       | 30 loci set E | 109.64 | [98.89, 119.71]  | 101.48 | [88.91, 111.90] |
|                         |       | 30 loci set F | 107.73 | [87.68, 122.92]  | 98.93  | [80.57, 113.81] |
| <b>Scombriformes</b>    | 1,084 | 30 loci set A | 110.30 | [101.51, 120.65] | 65.83  | [59.72, 74.36]  |
|                         |       | 30 loci set B | 110.65 | [97.59, 119.08]  | 68.10  | [61.74, 79.89]  |
|                         |       | 30 loci set C | 111.82 | [101.46, 120.96] | 66.96  | [60.70, 76.91]  |
|                         | 702   | 30 loci set D | 109.82 | [99.69, 119.86]  | 63.99  | [58.44, 71.70]  |
|                         |       | 30 loci set E | 109.64 | [98.89, 119.71]  | 64.74  | [59.56, 70.85]  |
|                         |       | 30 loci set F | 107.73 | [87.68, 122.92]  | 63.05  | [58.28, 69.03]  |
| <b>Blenniiformes</b>    | 1,084 | 30 loci set A | 105.90 | [96.11, 115.30]  | 96.20  | [86.23, 105.98] |
|                         |       | 30 loci set B | 107.22 | [96.59, 118.94]  | 96.77  | [84.99, 108.06] |
|                         |       | 30 loci set C | 106.45 | [95.78, 117.40]  | 95.84  | [83.69, 106.66] |
|                         | 702   | 30 loci set D | 107.79 | [97.99, 120.19]  | 98.25  | [88.06, 109.92] |
|                         |       | 30 loci set E | 104.16 | [93.40, 114.87]  | 93.99  | [83.25, 104.93] |
|                         |       | 30 loci set F | 102.17 | [87.07, 117.66]  | 90.17  | [78.27, 104.02] |
| <b>Synbranchiformes</b> | 1,084 | 30 loci set A | 98.87  | [87.37, 110.69]  | 86.89  | [73.15, 100.03] |
|                         |       | 30 loci set B | 99.34  | [86.57, 113.26]  | 85.96  | [72.16, 98.73]  |
|                         |       | 30 loci set C | 98.46  | [85.78, 111.44]  | 88.14  | [75.77, 102.19] |
|                         | 702   | 30 loci set D | 99.93  | [85.23, 111.97]  | 87.17  | [72.00, 101.38] |
|                         |       | 30 loci set E | 95.32  | [81.12, 108.53]  | 81.86  | [66.73, 96.64]  |
|                         |       | 30 loci set F | 97.98  | [78.90, 112.10]  | 83.95  | [66.38, 100.05] |
| <b>Carangiformes</b>    | 1,084 | 30 loci set A | 98.87  | [87.37, 110.69]  | 75.72  | [66.44, 86.53]  |
|                         |       | 30 loci set B | 99.34  | [86.57, 113.26]  | 73.94  | [65.91, 85.40]  |
|                         |       | 30 loci set C | 98.46  | [85.78, 111.44]  | 73.12  | [65.15, 85.06]  |
|                         | 702   | 30 loci set D | 99.93  | [85.23, 111.97]  | 75.66  | [65.74, 88.17]  |
|                         |       | 30 loci set E | 95.32  | [81.12, 108.53]  | 73.30  | [64.89, 83.24]  |
|                         |       | 30 loci set F | 97.98  | [78.90, 112.10]  | 71.38  | [63.27, 81.47]  |
| <b>Perciformes</b>      | 1,084 | 30 loci set A | 93.73  | [81.70, 107.69]  | 66.86  | [55.18, 78.00]  |
|                         |       | 30 loci set B | 87.35  | [77.09, 101.56]  | 58.70  | [48.42, 71.23]  |
|                         |       | 30 loci set C | 86.31  | [76.71, 99.62]   | 61.77  | [51.99, 71.14]  |
|                         | 702   | 30 loci set D | 86.27  | [76.37, 98.52]   | 63.53  | [52.65, 77.01]  |
|                         |       | 30 loci set E | 87.27  | [76.89, 100.23]  | 59.84  | [48.61, 71.50]  |
|                         |       | 30 loci set F | 88.41  | [77.47, 104.10]  | 59.33  | [49.69, 72.02]  |
| <b>Centrarchiformes</b> | 1,084 | 30 loci set A | 83.17  | [75.26, 92.76]   | 53.26  | [35.65, 78.06]  |
|                         |       | 30 loci set B | 80.67  | [73.27, 90.20]   | 50.84  | [35.00, 77.08]  |

|                         |       |               |        |                  |        |                  |
|-------------------------|-------|---------------|--------|------------------|--------|------------------|
|                         |       | 30 loci set C | 80.55  | [73.40, 89.02]   | 78.34  | [59.02, 88.96]   |
|                         | 702   | 30 loci set D | 81.63  | [73.63, 91.51]   | 54.56  | [36.97, 79.62]   |
|                         |       | 30 loci set E | 80.75  | [73.11, 89.16]   | 61.09  | [38.33, 84.46]   |
|                         |       | 30 loci set F | 82.97  | [73.07, 93.94]   | 46.08  | [31.65, 71.94]   |
| <b>Labriformes</b>      | 1,084 | 30 loci set A | 81.03  | [73.25, 89.30]   | 76.07  | [66.21, 86.95]   |
|                         |       | 30 loci set B | 78.81  | [71.72, 87.07]   | 76.55  | [67.89, 85.94]   |
|                         |       | 30 loci set C | 79.34  | [72.06, 87.16]   | 75.25  | [65.80, 84.60]   |
|                         | 702   | 30 loci set D | 79.91  | [72.33, 88.93]   | 74.89  | [64.69, 85.59]   |
|                         |       | 30 loci set E | 79.06  | [71.80, 86.93]   | 76.45  | [73.11, 89.16]   |
|                         |       | 30 loci set F | 81.47  | [71.92, 91.68]   | 77.08  | [66.51, 88.21]   |
| <b>Acropomatiformes</b> | 1,084 | 30 loci set A | 80.09  | [73.10, 88.58]   | 46.53  | [32.55, 60.96]   |
|                         |       | 30 loci set B | 77.12  | [70.67, 84.95]   | 47.39  | [33.95, 65.12]   |
|                         |       | 30 loci set C | 78.32  | [71.11, 85.72]   | 46.24  | [33.17, 59.99]   |
|                         | 702   | 30 loci set D | 78.83  | [71.72, 87.89]   | 23.78  | [14.06, 35.85]   |
|                         |       | 30 loci set E | 77.45  | [70.87, 85.19]   | 22.06  | [13.60, 33.15]   |
|                         |       | 30 loci set F | 80.07  | [70.93, 89.84]   | 21.41  | [12.44, 31.76]   |
| <b>Acanthuriformes</b>  | 1,084 | 30 loci set A | 80.09  | [73.10, 88.58]   | 78.52  | [72.01, 86.64]   |
|                         |       | 30 loci set B | 77.12  | [70.67, 84.95]   | 75.78  | [69.13, 82.30]   |
|                         |       | 30 loci set C | 78.32  | [71.11, 85.72]   | 76.51  | [70.12, 84.05]   |
|                         | 702   | 30 loci set D | 78.83  | [71.72, 87.89]   | 76.39  | [69.95, 84.70]   |
|                         |       | 30 loci set E | 77.45  | [70.87, 85.19]   | 75.97  | [69.71, 83.28]   |
|                         |       | 30 loci set F | 80.07  | [70.93, 89.84]   | 78.16  | [69.59, 87.49]   |
| <b>Percomorpha</b>      | 1,084 | 30 loci set A | 132.91 | [123.97, 143.13] | 126.76 | [116.96, 135.68] |
|                         |       | 30 loci set B | 132.29 | [122.95, 141.24] | 126.31 | [117.66, 135.78] |
|                         |       | 30 loci set C | 133.93 | [126.23, 141.83] | 127.63 | [120.65, 136.57] |
|                         | 702   | 30 loci set D | 134.77 | [126.10, 144.04] | 128.36 | [119.08, 137.65] |
|                         |       | 30 loci set E | 134.80 | [125.53, 143.44] | 127.61 | [117.49, 137.46] |
|                         |       | 30 loci set F | 134.23 | [116.61, 148.64] | 127.09 | [105.34, 141.44] |

148

149

150

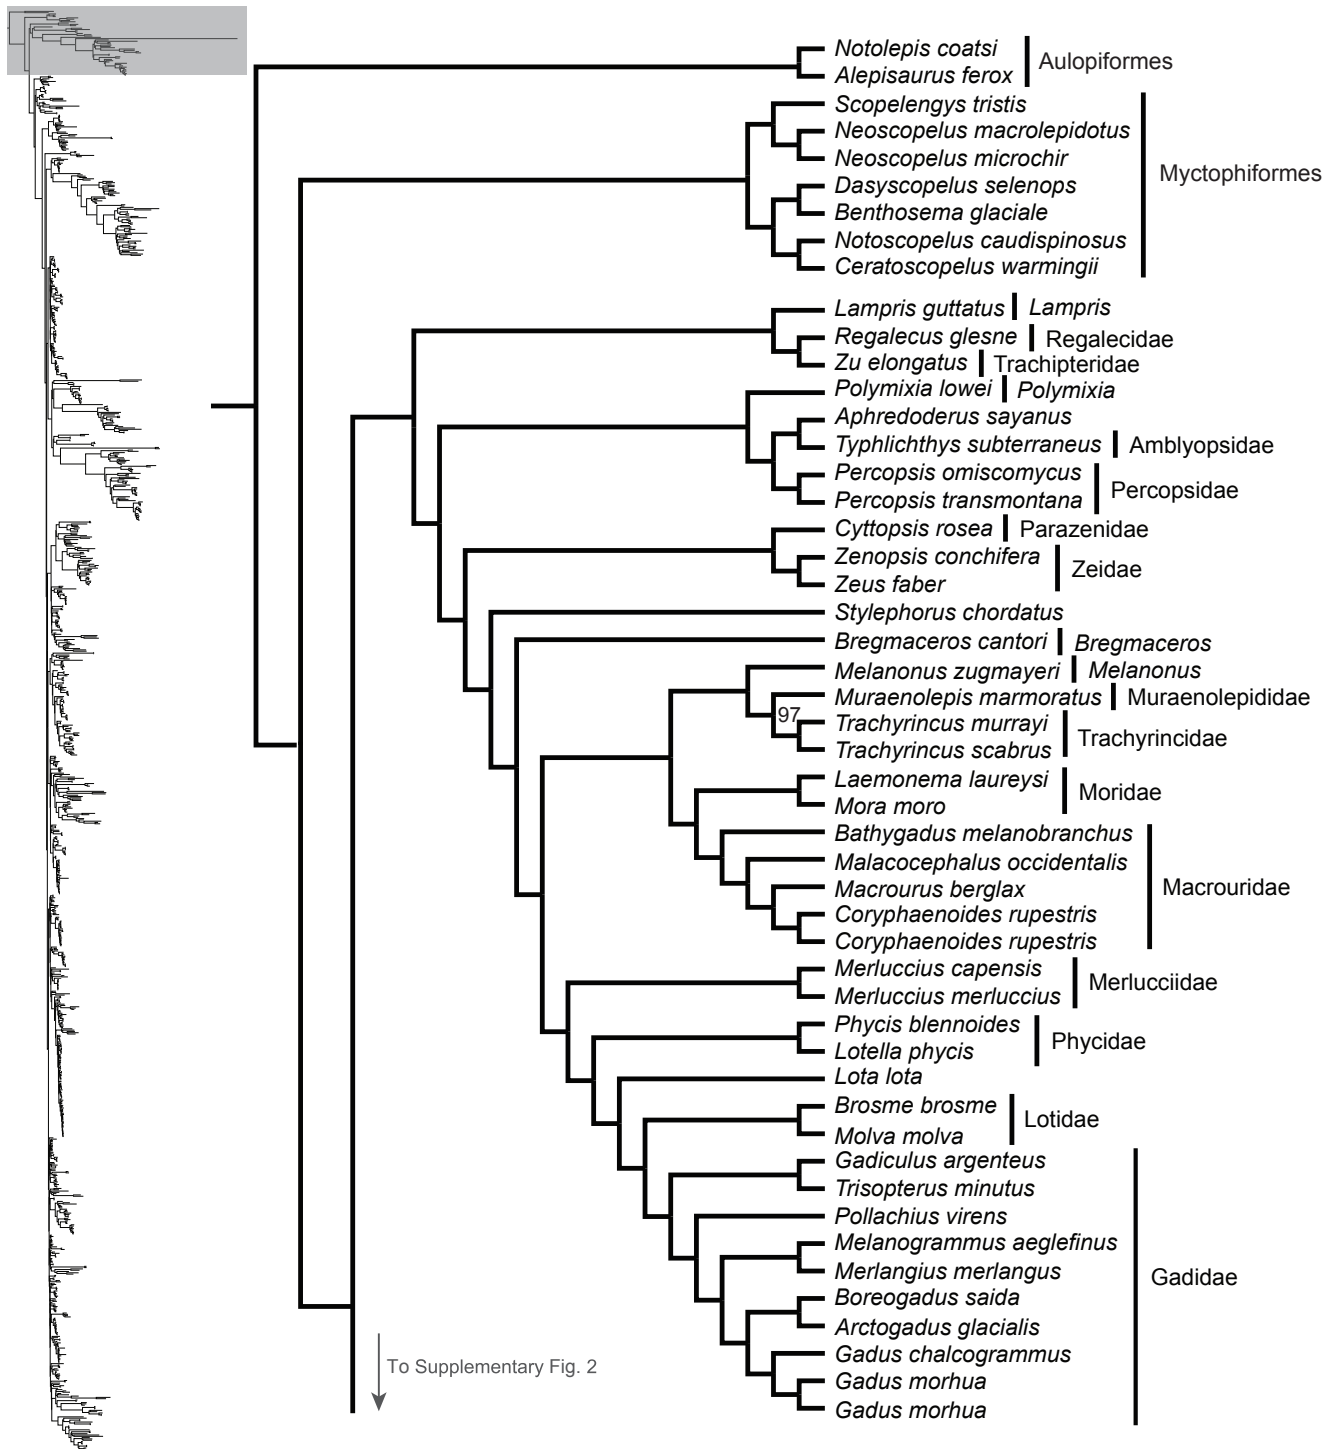

### Supplementary Fig. 1: Maximum likelihood phylogeny inferred in IQ-TREE.

A guide tree on the left marks (with a gray rectangle), the region of the acanthomorph tree represented in the figure. Numbers at nodes reflect bootstrap support values. All nodes without a numerical annotation have 100% bootstrap support. Orders, families or genera for taxa are listed to the right of the vertical black bars. Any tips left unassigned to a higher taxon are monotypic or monogeneric taxa.

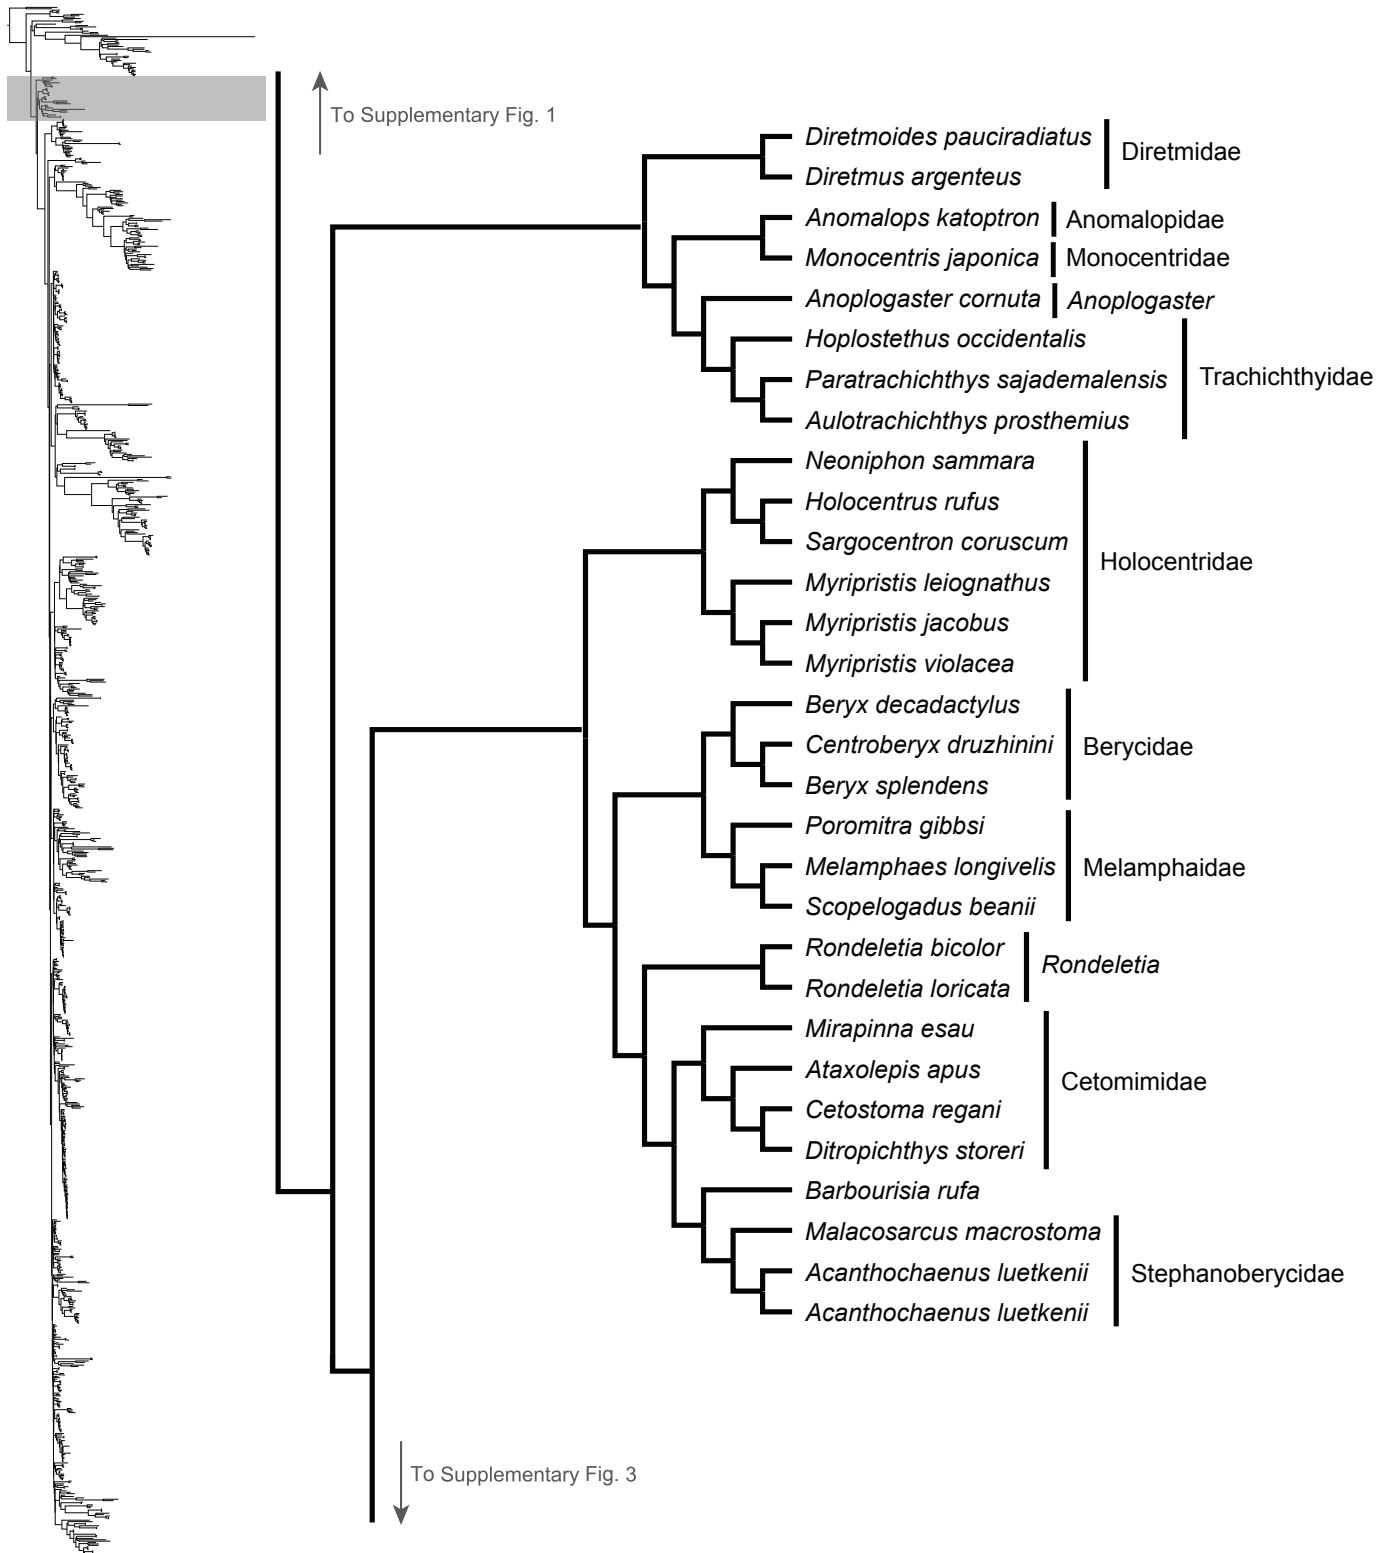

**Supplementary Fig. 2: Maximum likelihood phylogeny inferred in IQ-TREE.**

A guide tree on the left marks (with a gray rectangle), the region of the acanthomorph tree represented in the figure. All nodes have 100% bootstrap support. Orders, families or genera for taxa are listed to the right of the vertical black bars. Any tips left unassigned to a higher taxon are monotypic or monogeneric taxa.

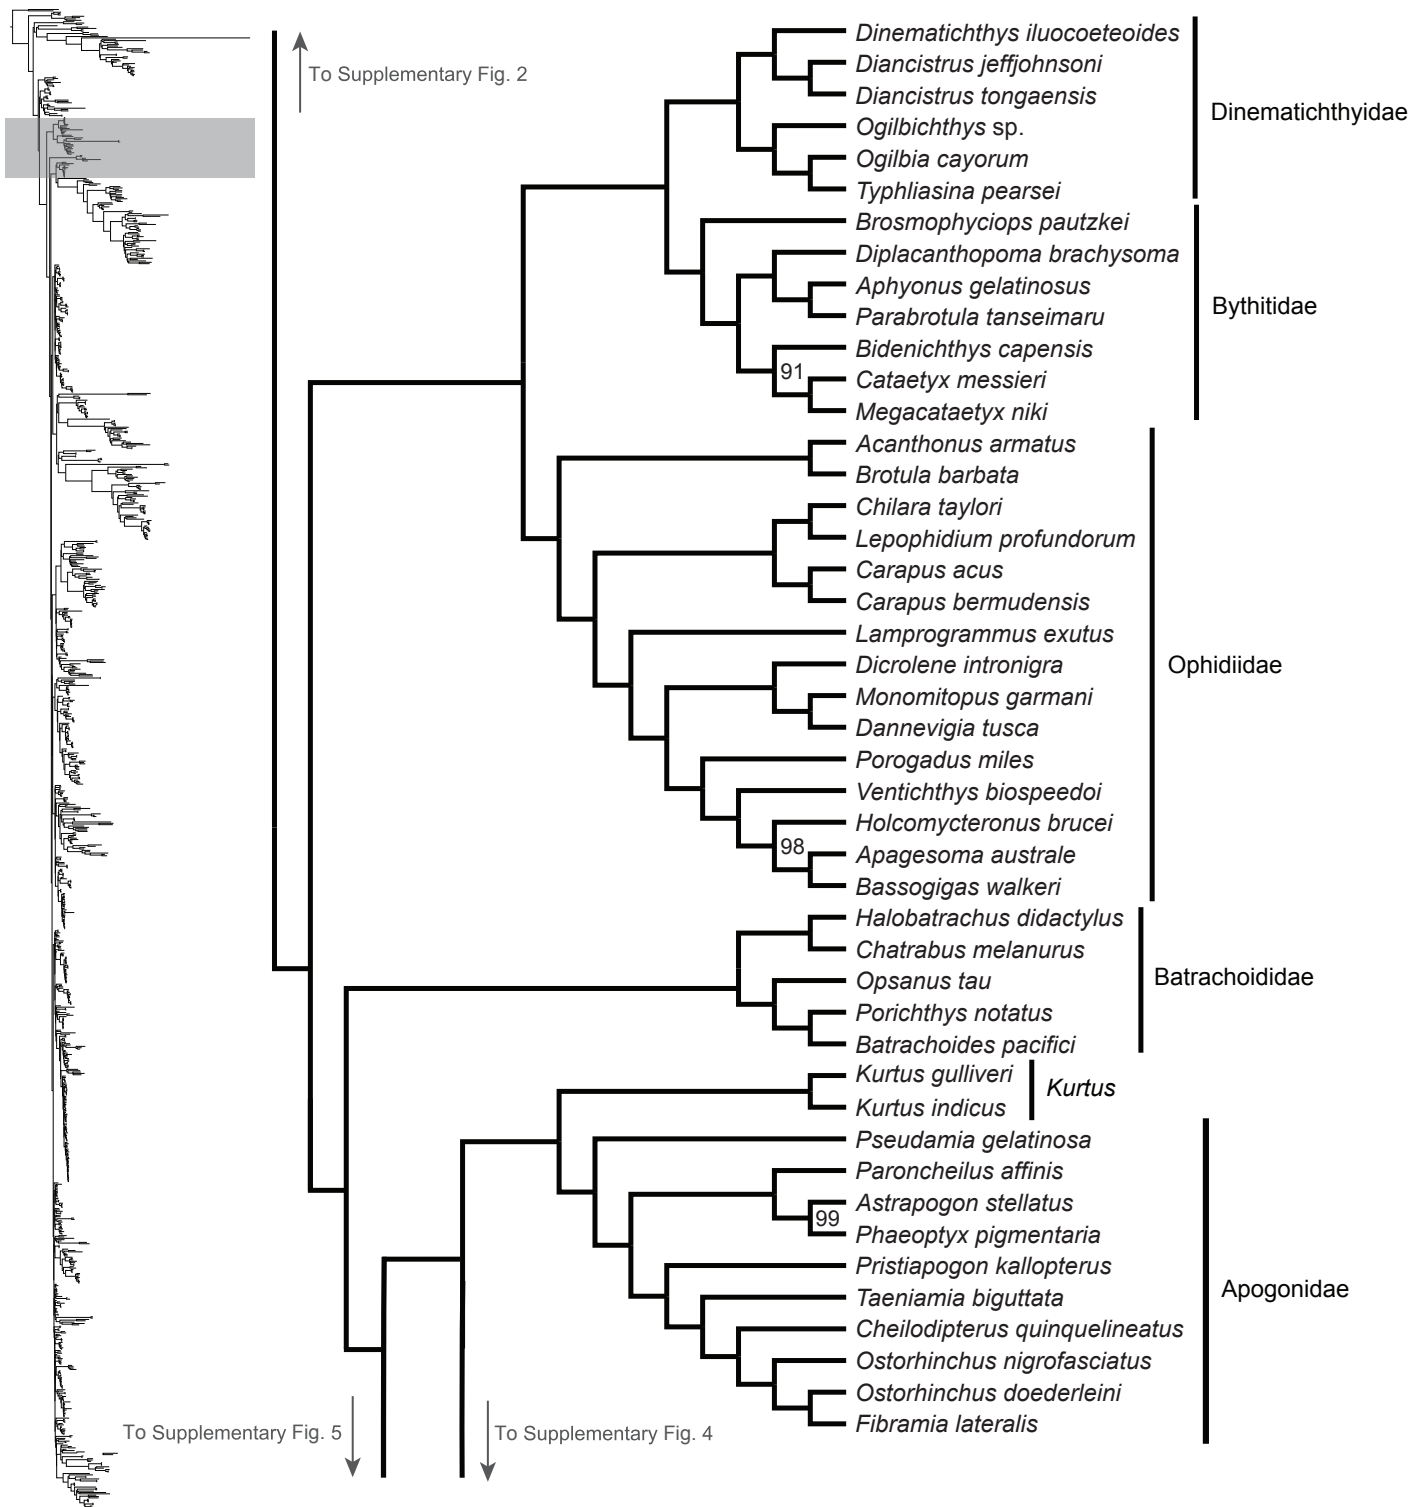

### Supplementary Fig. 3: Maximum likelihood phylogeny inferred in IQ-TREE.

A guide tree on the left marks (with a gray rectangle), the region of the acanthomorph tree represented in the figure. Numbers at nodes reflect bootstrap support values. All nodes without a numerical annotation have 100% bootstrap support. Orders, families or genera for taxa are listed to the right of the vertical black bars.



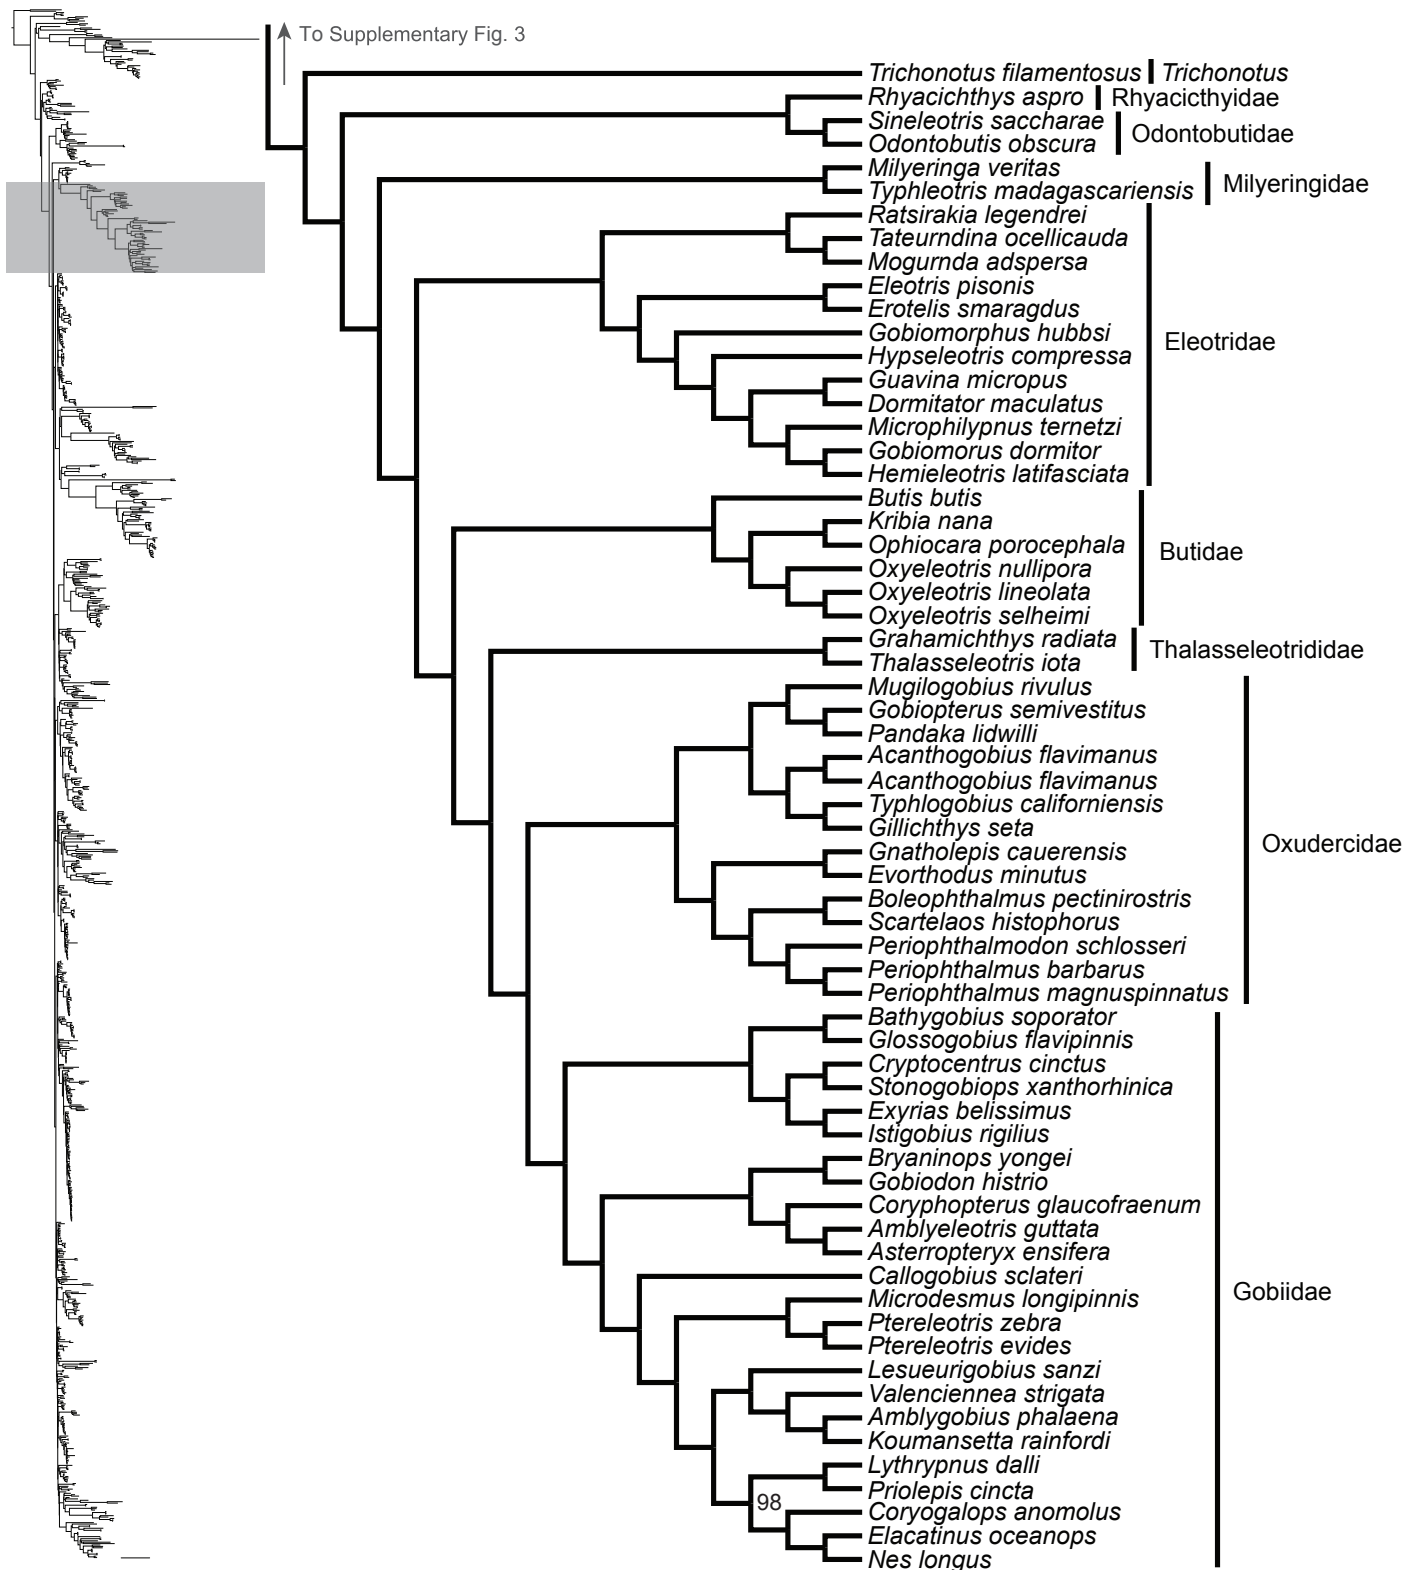

**Supplementary Fig. 4: Maximum likelihood phylogeny inferred in IQ-TREE.**

A guide tree on the left marks (with a gray rectangle), the region of the acanthomorph tree represented in the figure. Numbers at nodes reflect bootstrap support values. All nodes without a numerical annotation have 100% bootstrap support. Orders, families or genera for taxa are listed to the right of the vertical black bars.

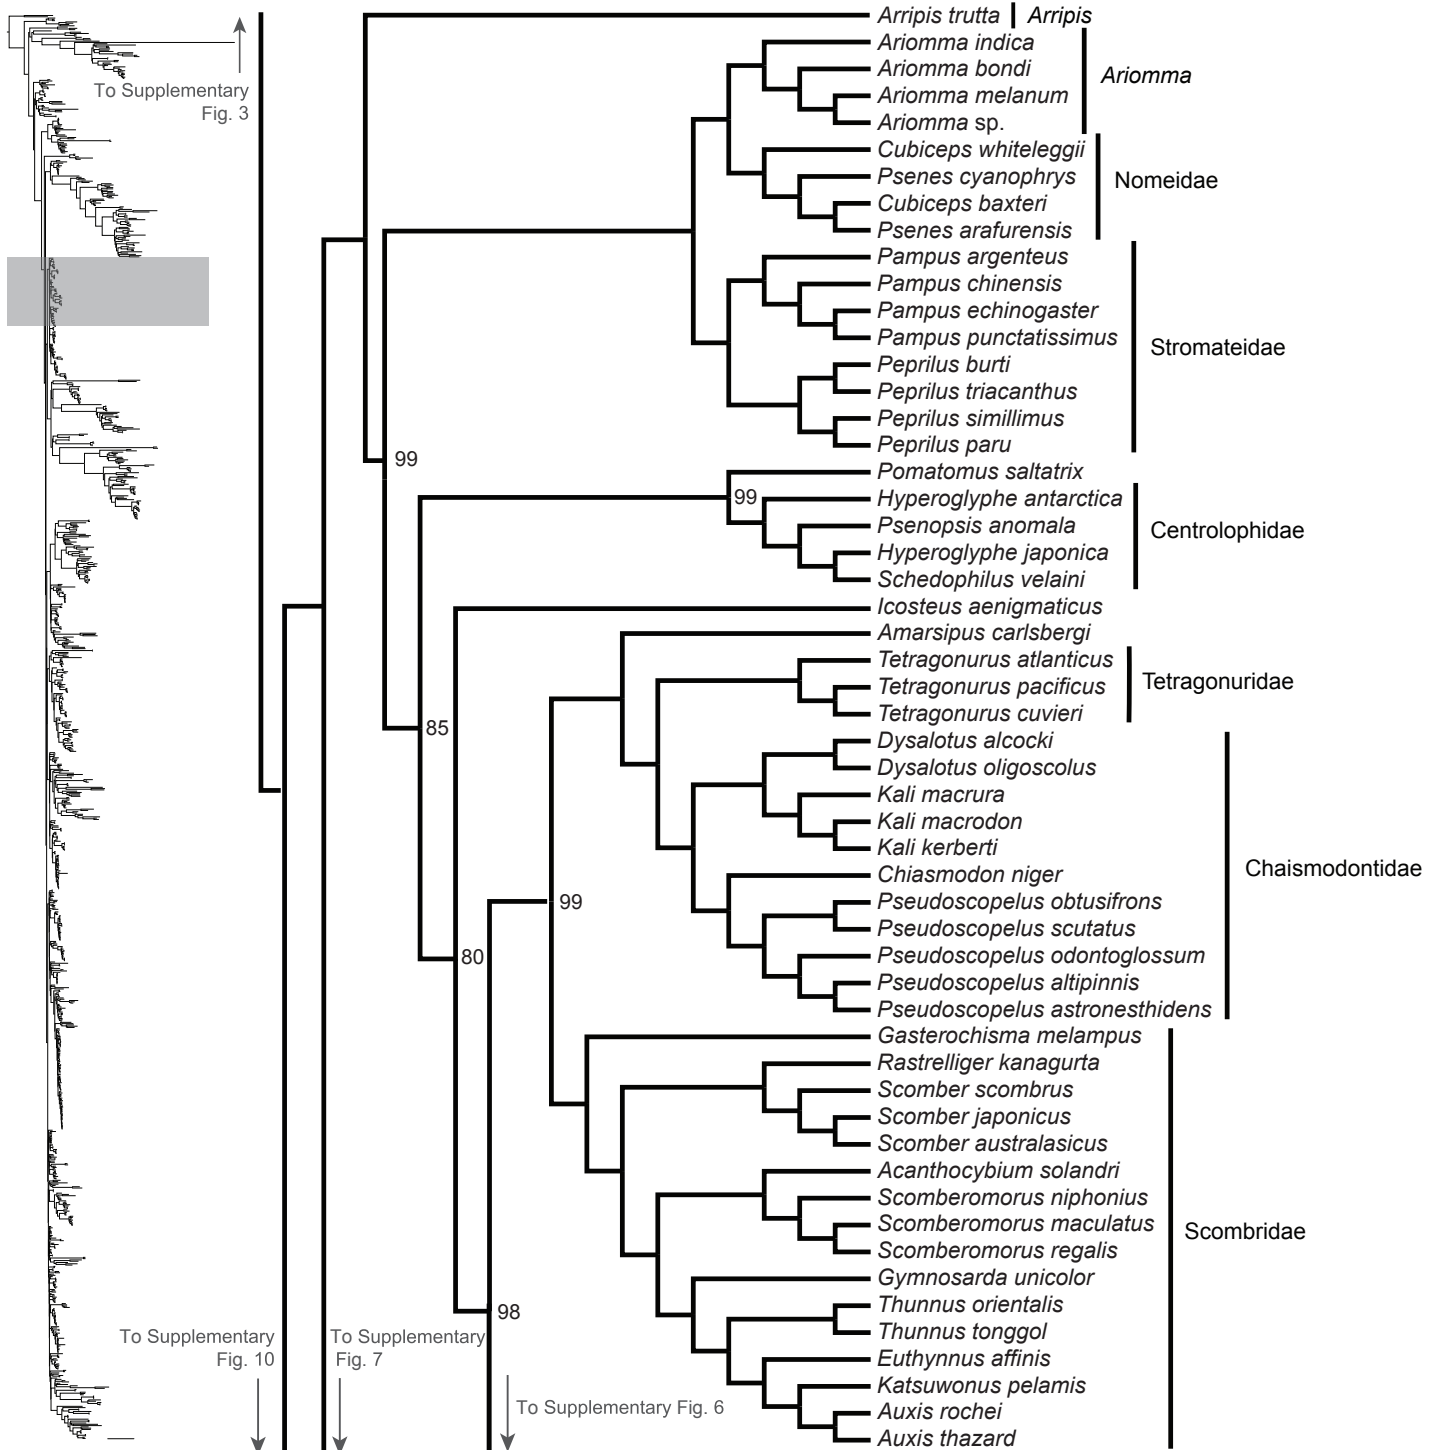

**Supplementary Fig. 5: Maximum likelihood phylogeny inferred in IQ-TREE.**

A guide tree on the left marks (with a gray rectangle), the region of the acanthomorph tree represented in the figure. Numbers at nodes reflect bootstrap support values. All nodes without a numerical annotation have 100% bootstrap support. Orders, families or genera for taxa are listed to the right of the vertical black bars. Any tips left unassigned to a higher taxon are monotypic or monogeneric taxa.

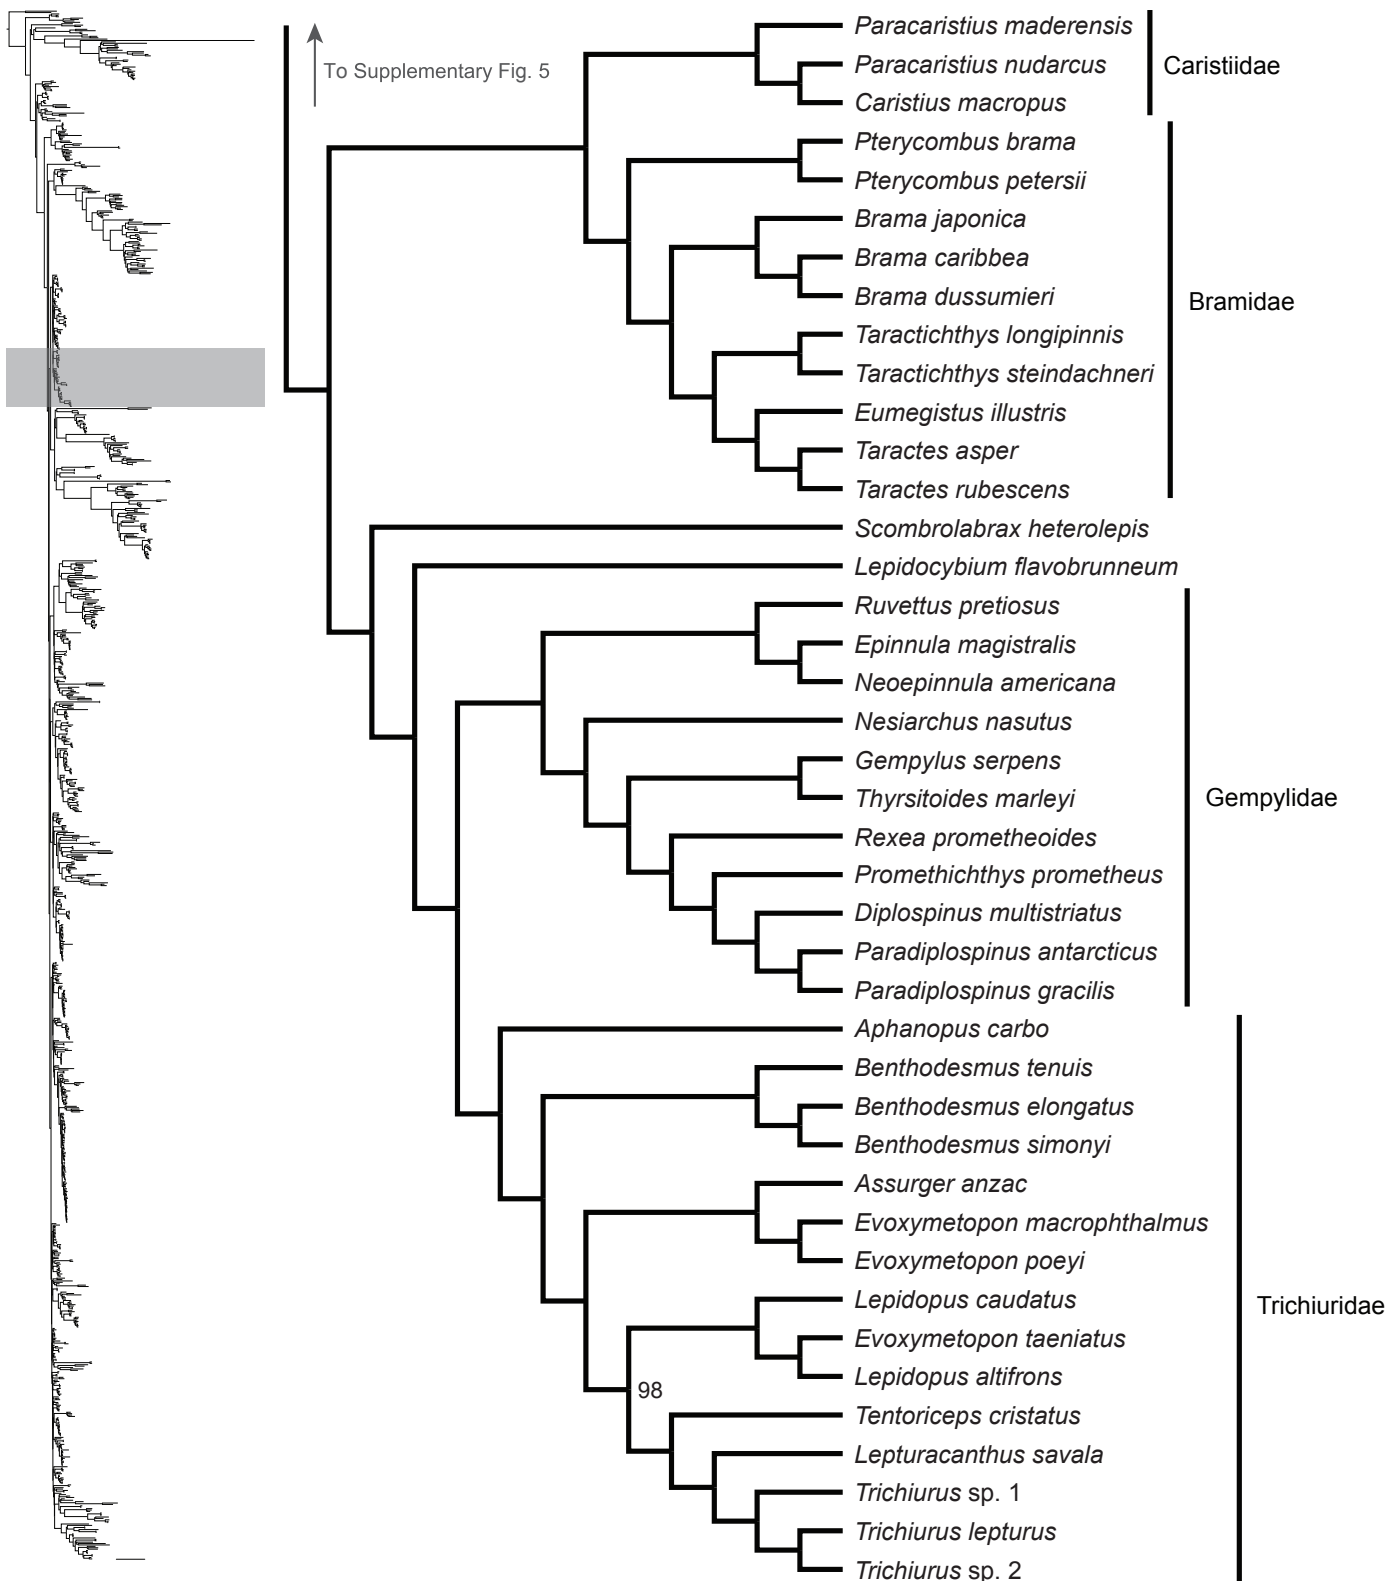

**Supplementary Fig. 6: Maximum likelihood phylogeny inferred in IQ-TREE.**

A guide tree on the left marks (with a gray rectangle), the region of the acanthomorph tree represented in the figure. Numbers at nodes reflect bootstrap support values. All nodes without a numerical annotation have 100% bootstrap support. Orders, families or genera for taxa are listed to the right of the vertical black bars. Any tips left unassigned to a higher taxon are monotypic or monogeneric taxa.

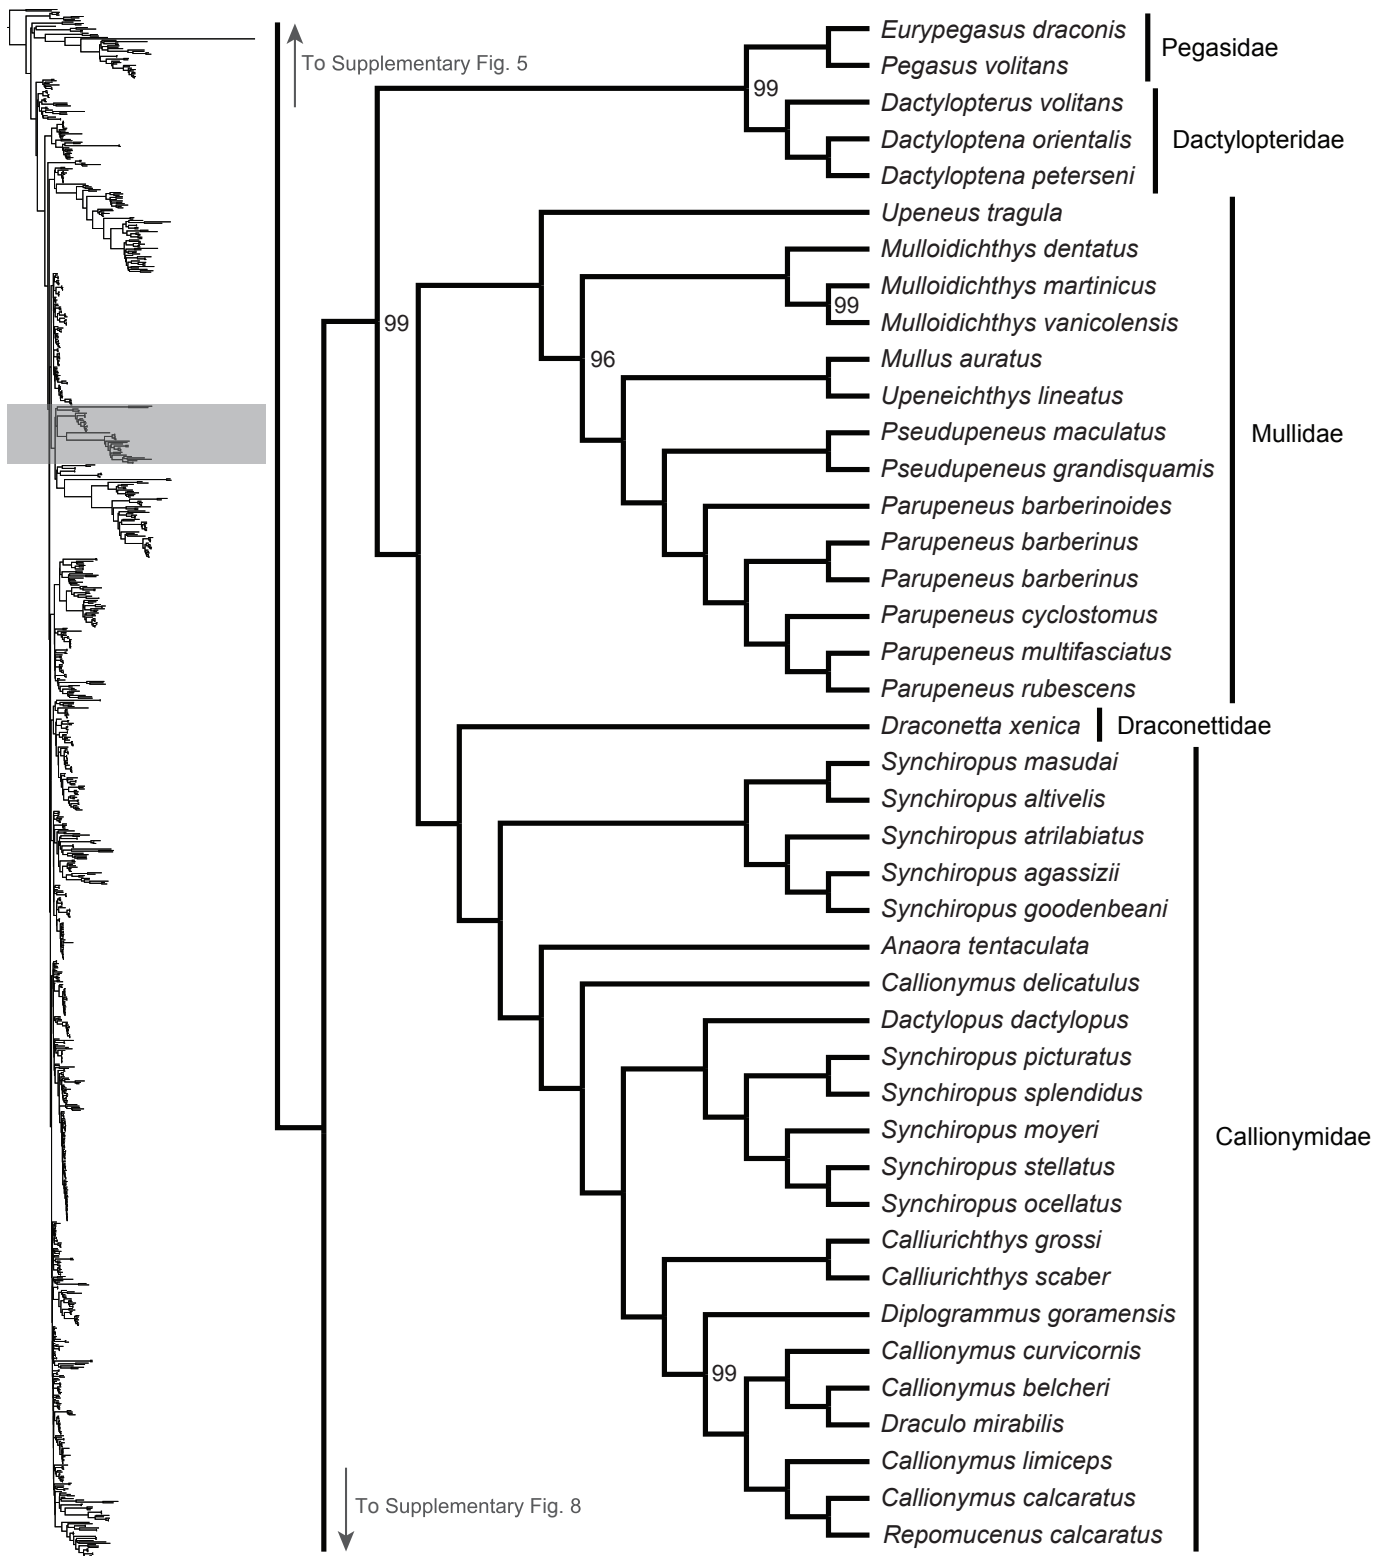

### Supplementary Fig. 7: Maximum likelihood phylogeny inferred in IQ-TREE.

A guide tree on the left marks (with a gray rectangle), the region of the acanthomorph tree represented in the figure. Numbers at nodes reflect bootstrap support values. All nodes without a numerical annotation have 100% bootstrap support. Orders, families or genera for taxa are listed to the right of the vertical black bars.

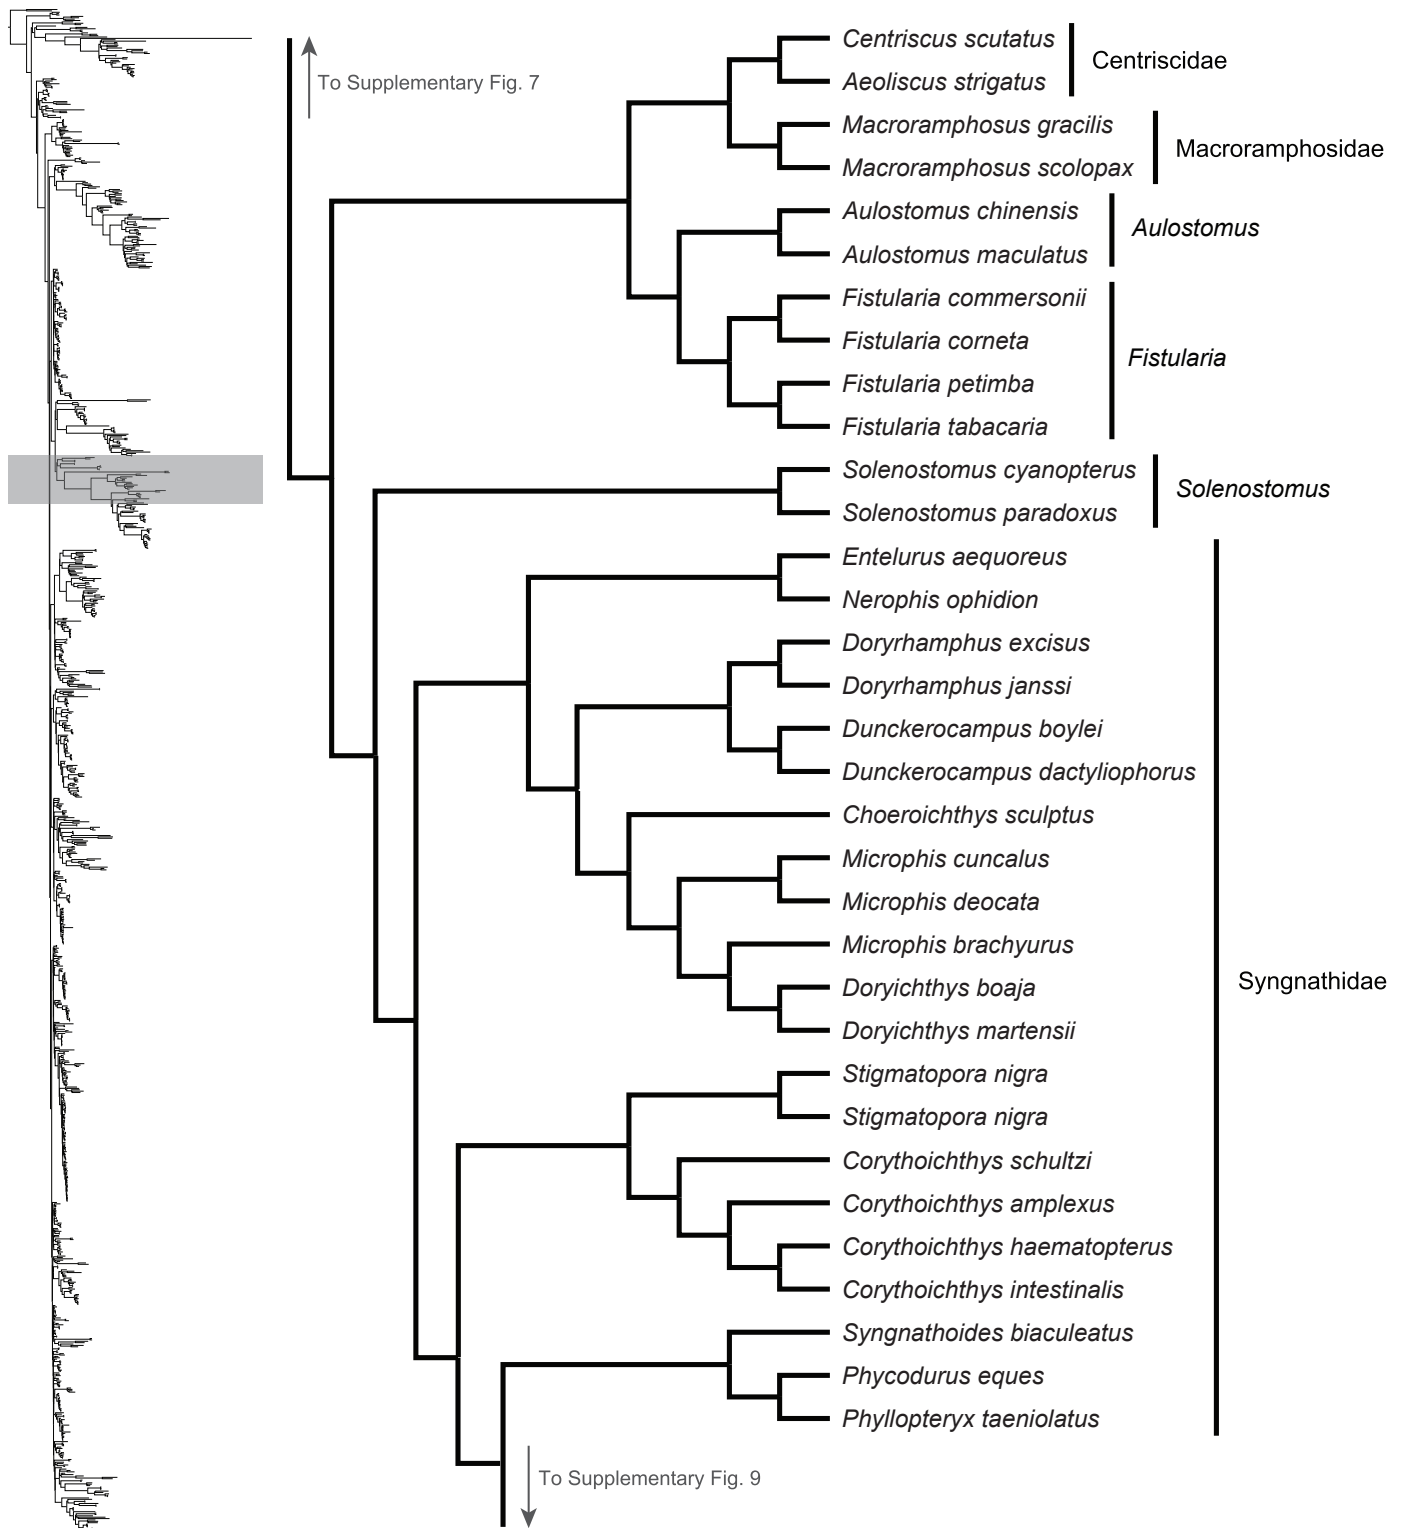

**Supplementary Fig. 8: Maximum likelihood phylogeny inferred in IQ-TREE.**

A guide tree on the left marks (with a gray rectangle), the region of the acanthomorph tree represented in the figure. All nodes have 100% bootstrap support. Orders, families or genera for taxa are listed to the right of the vertical black bars.

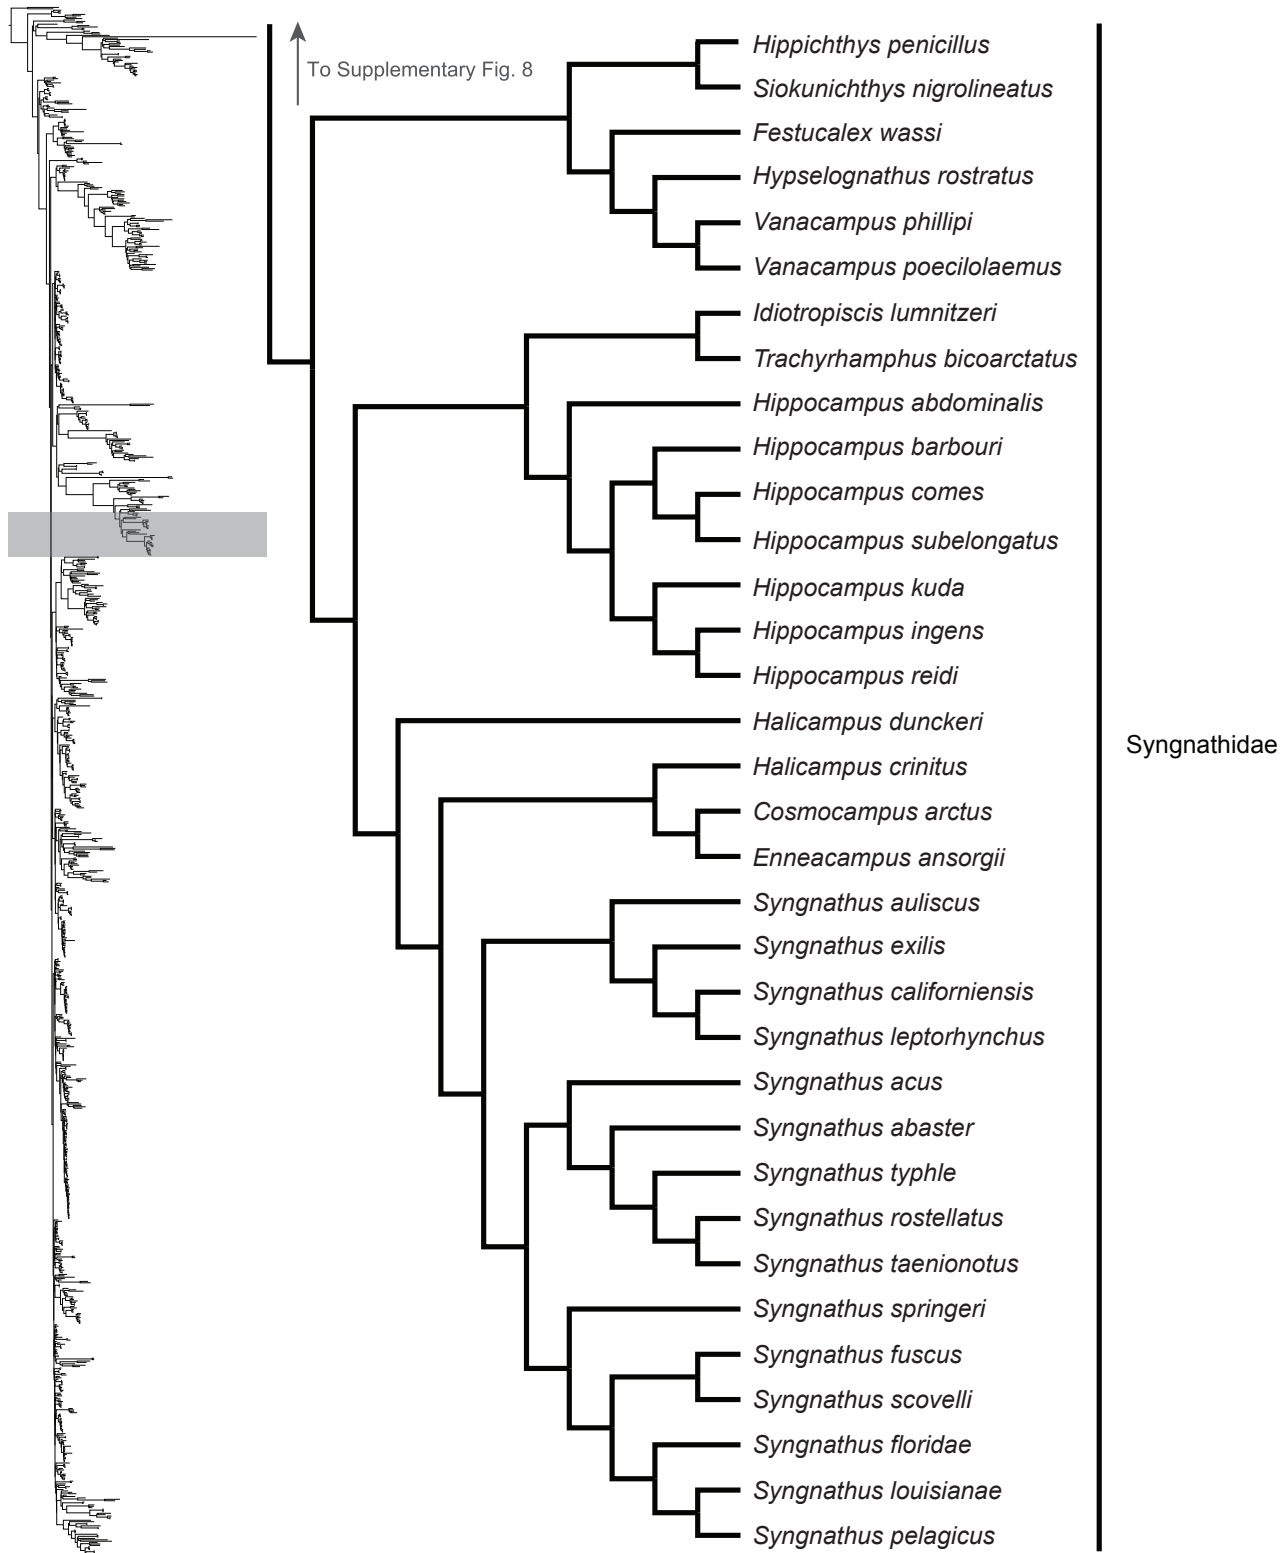

**Supplementary Fig. 9: Maximum likelihood phylogeny inferred in IQ-TREE.**

A guide tree on the left marks (with a gray rectangle), the region of the acanthomorph tree represented in the figure. All nodes have 100% bootstrap support. Orders, families or genera for taxa are listed to the right of the vertical black bars.

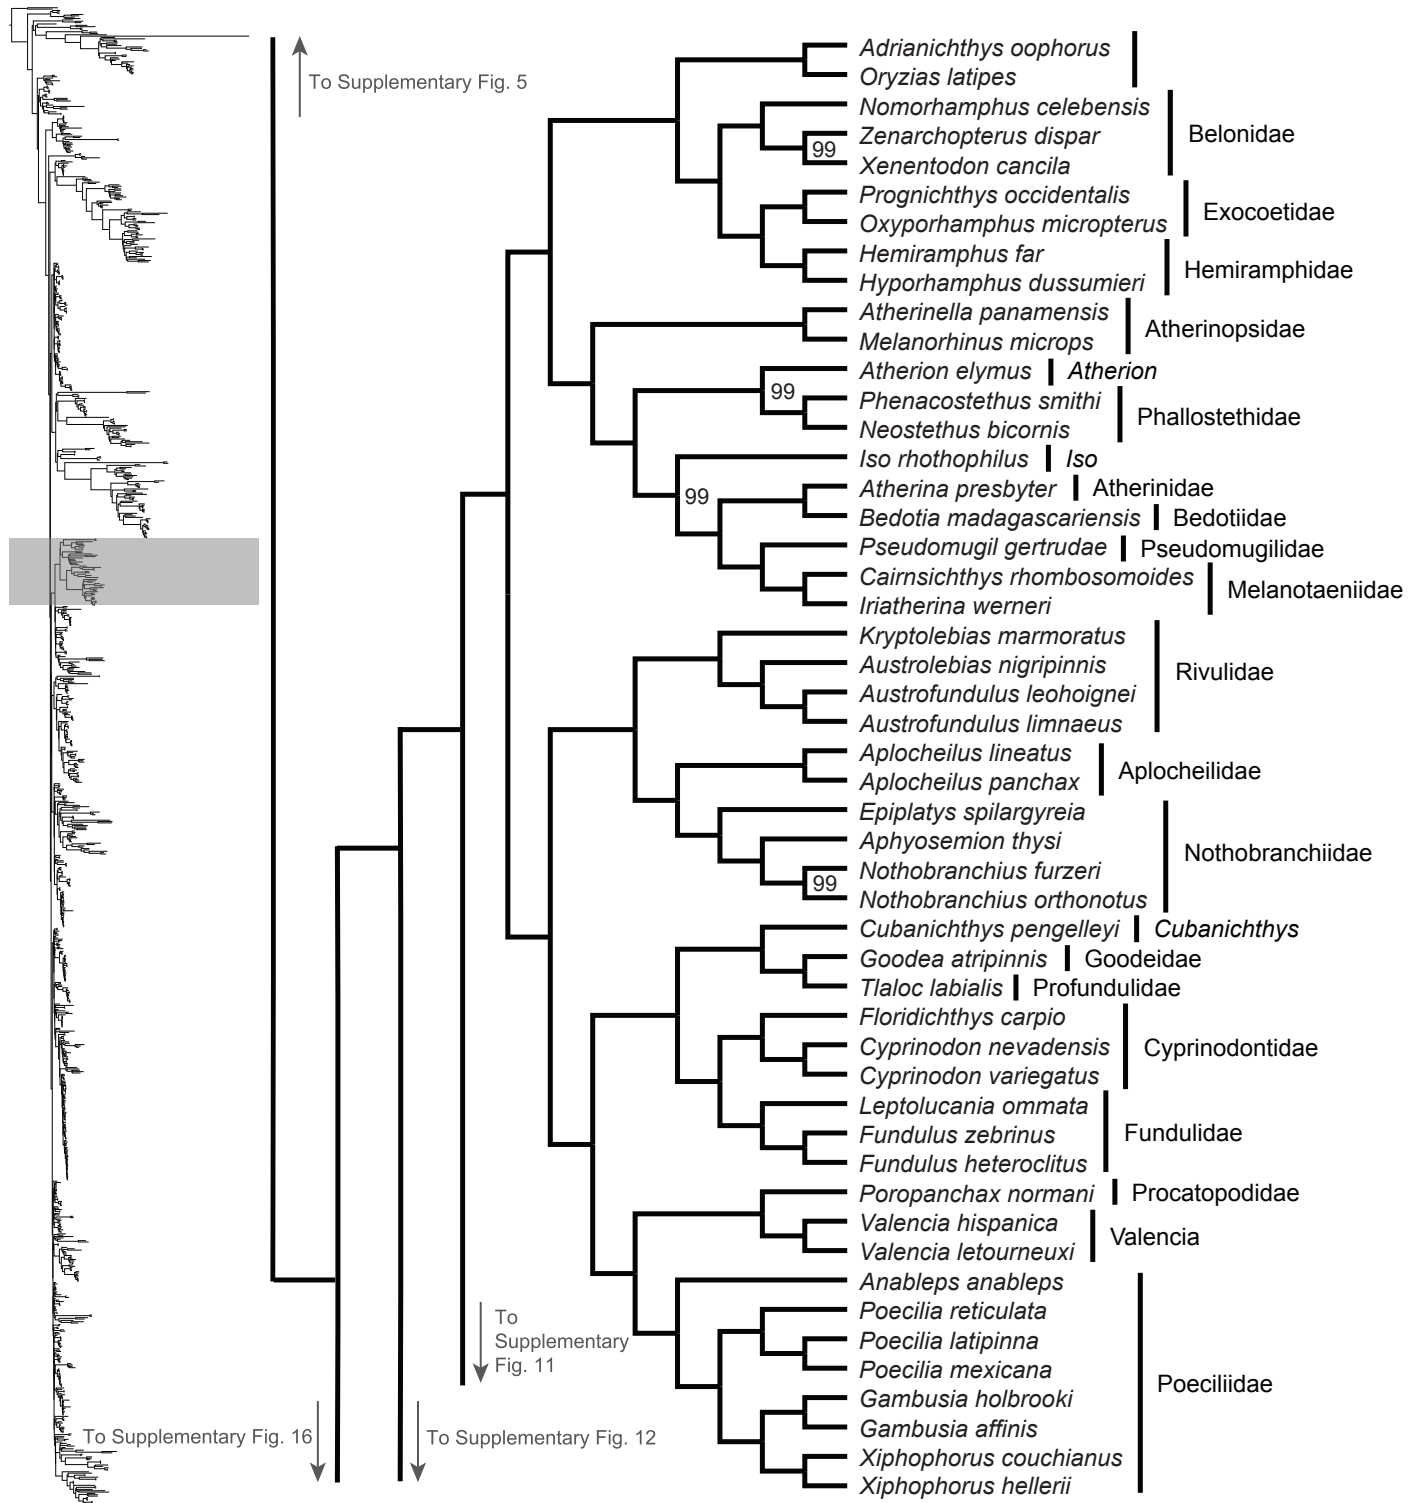

### Supplementary Fig. 10: Maximum likelihood phylogeny inferred in IQ-TREE.

A guide tree on the left marks (with a gray rectangle), the region of the acanthomorph tree represented in the figure. Numbers at nodes reflect bootstrap support values. All nodes without a numerical annotation have 100% bootstrap support. Orders, families or genera for taxa are listed to the right of the vertical black bars.

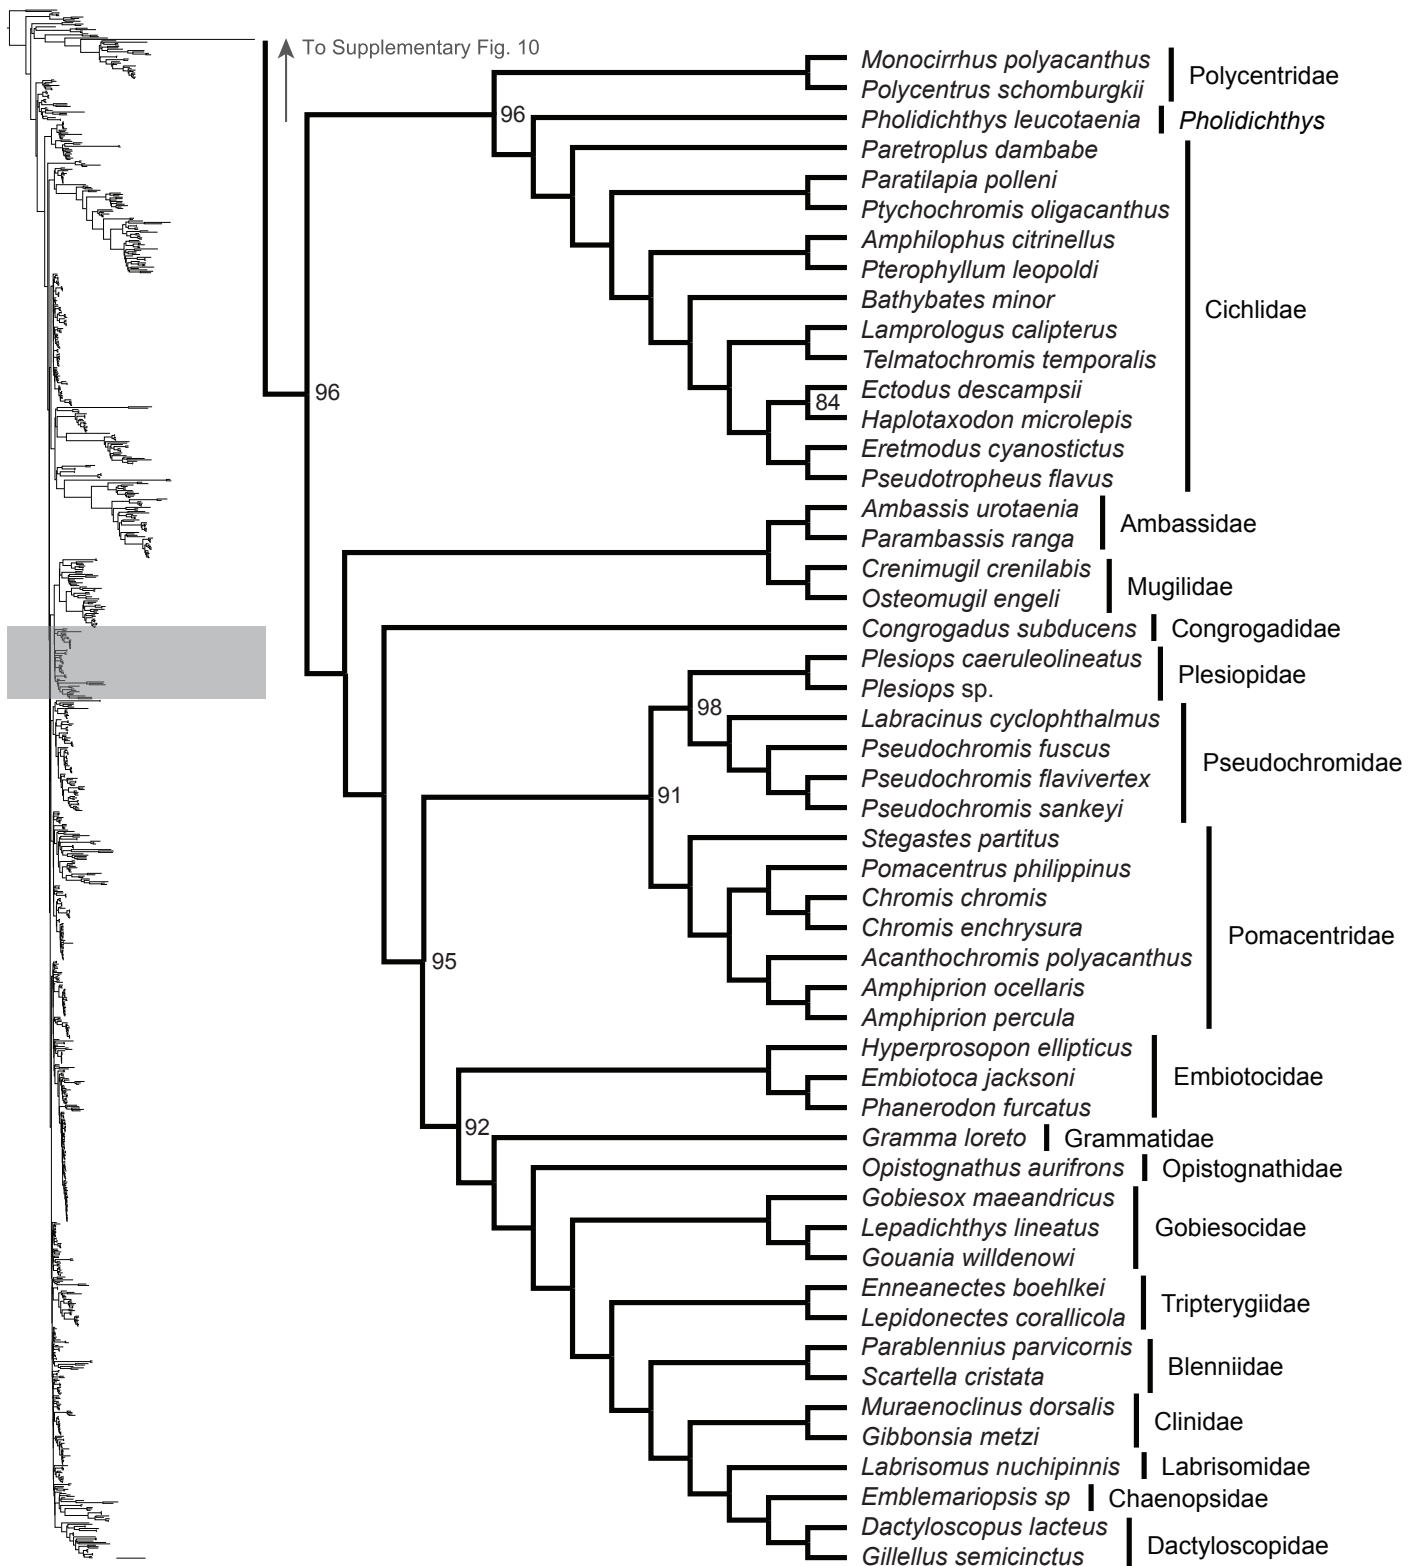

**Supplementary Fig. 11: Maximum likelihood phylogeny inferred in IQ-TREE.**

A guide tree on the left marks (with a gray rectangle), the region of the acanthomorph tree represented in the figure. Numbers at nodes reflect bootstrap support values. All nodes without a numerical annotation have 100% bootstrap support. Orders, families or genera for taxa are listed to the right of the vertical black bars.



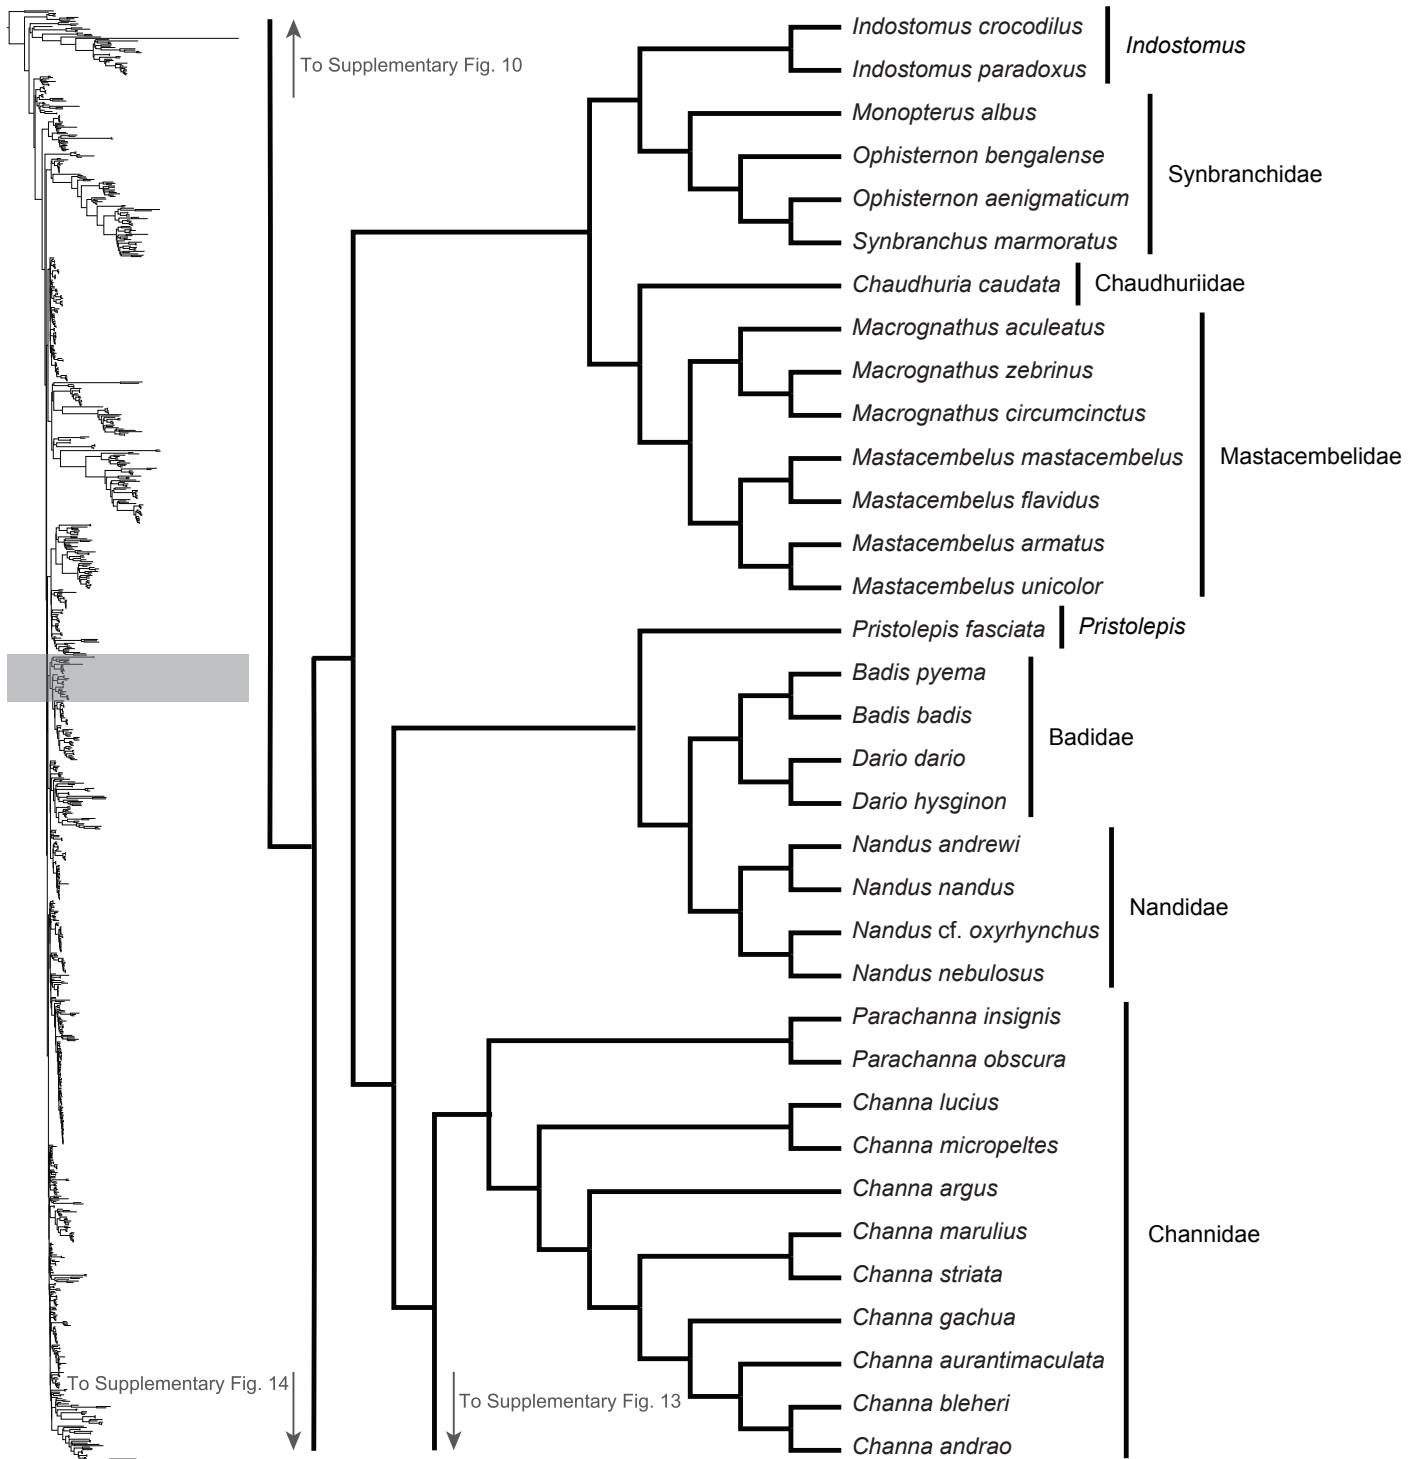

**Supplementary Fig. 12: Maximum likelihood phylogeny inferred in IQ-TREE.**

A guide tree on the left marks (with a gray rectangle), the region of the acanthomorph tree represented in the figure. All nodes have 100% bootstrap support. Orders, families or genera for taxa are listed to the right of the vertical black bars.

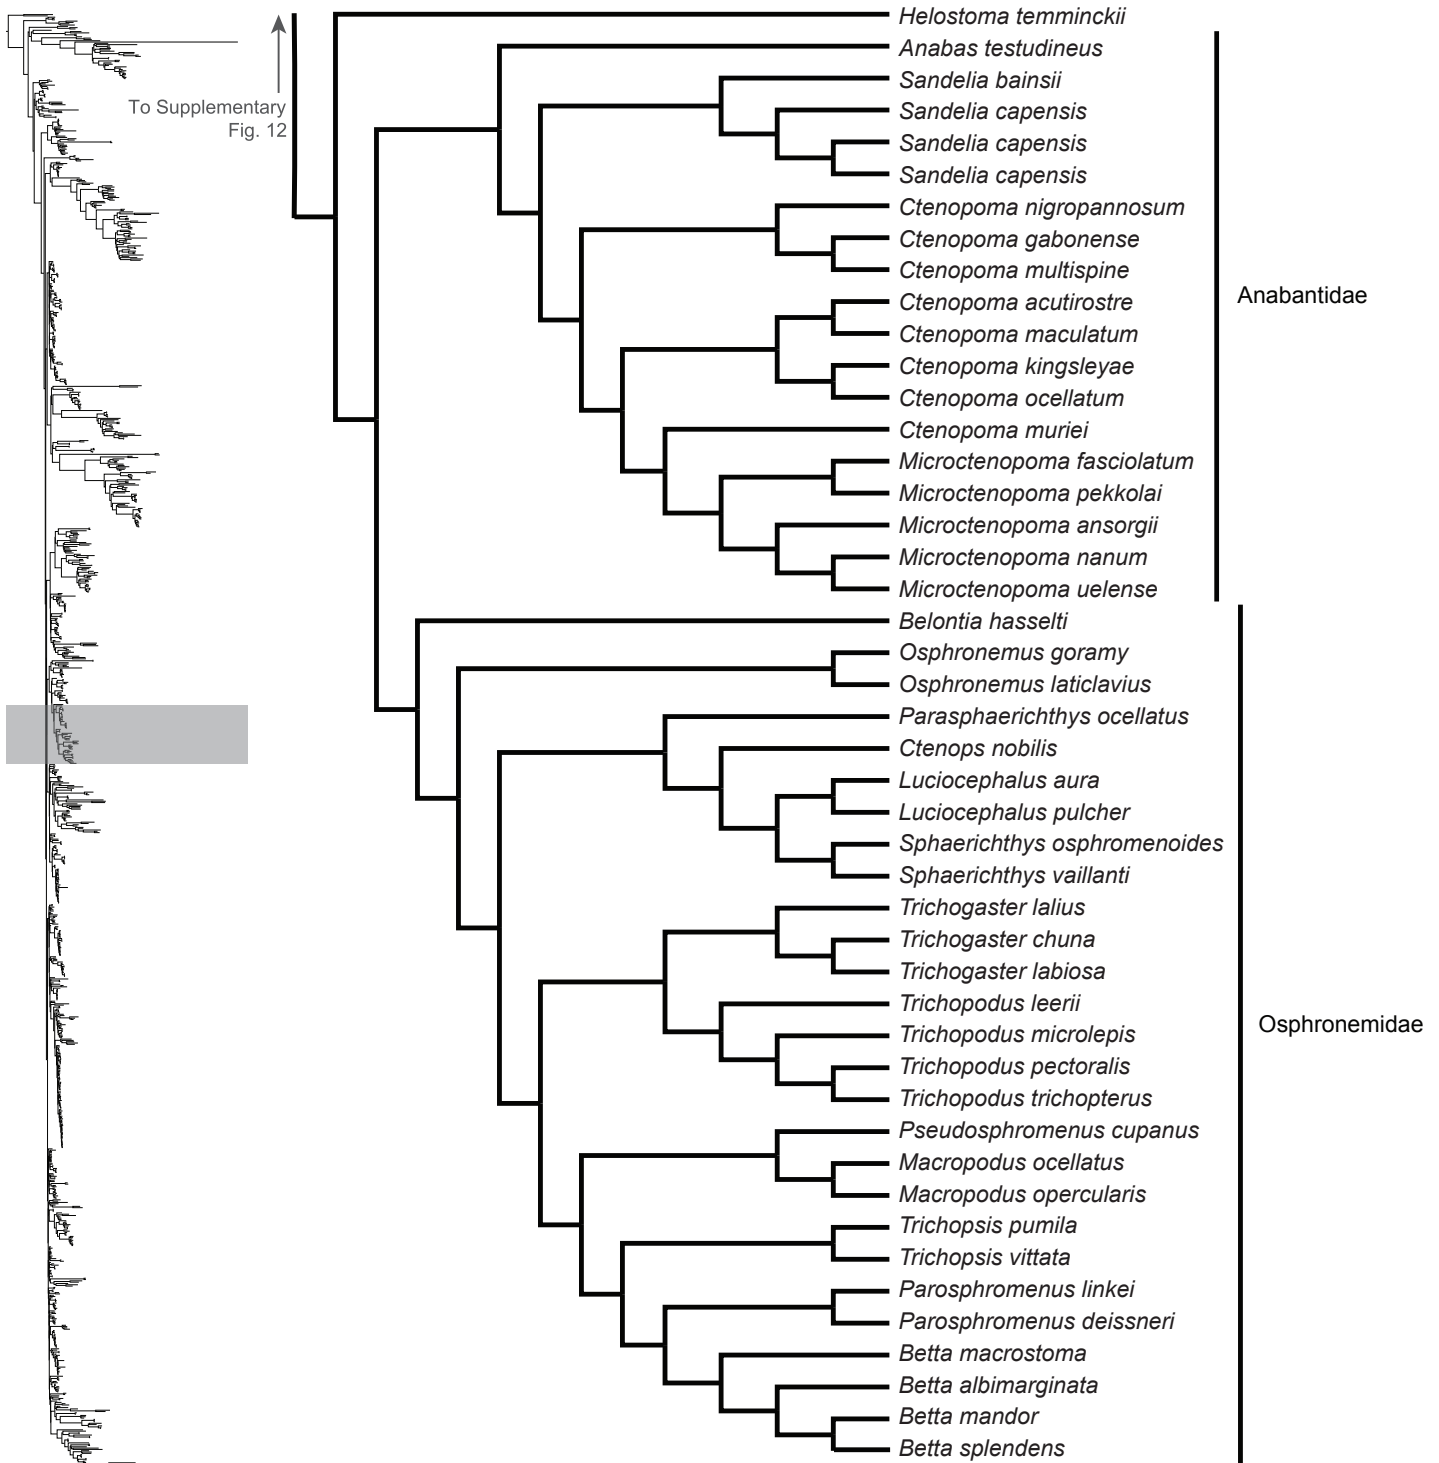

**Supplementary Fig. 13: Maximum likelihood phylogeny inferred in IQ-TREE.**

A guide tree on the left marks (with a gray rectangle), the region of the acanthomorph tree represented in the figure. All nodes have 100% bootstrap support. Orders, families or genera for taxa are listed to the right of the vertical black bars. Any tips left unassigned to a higher taxon are monotypic or monogeneric taxa.

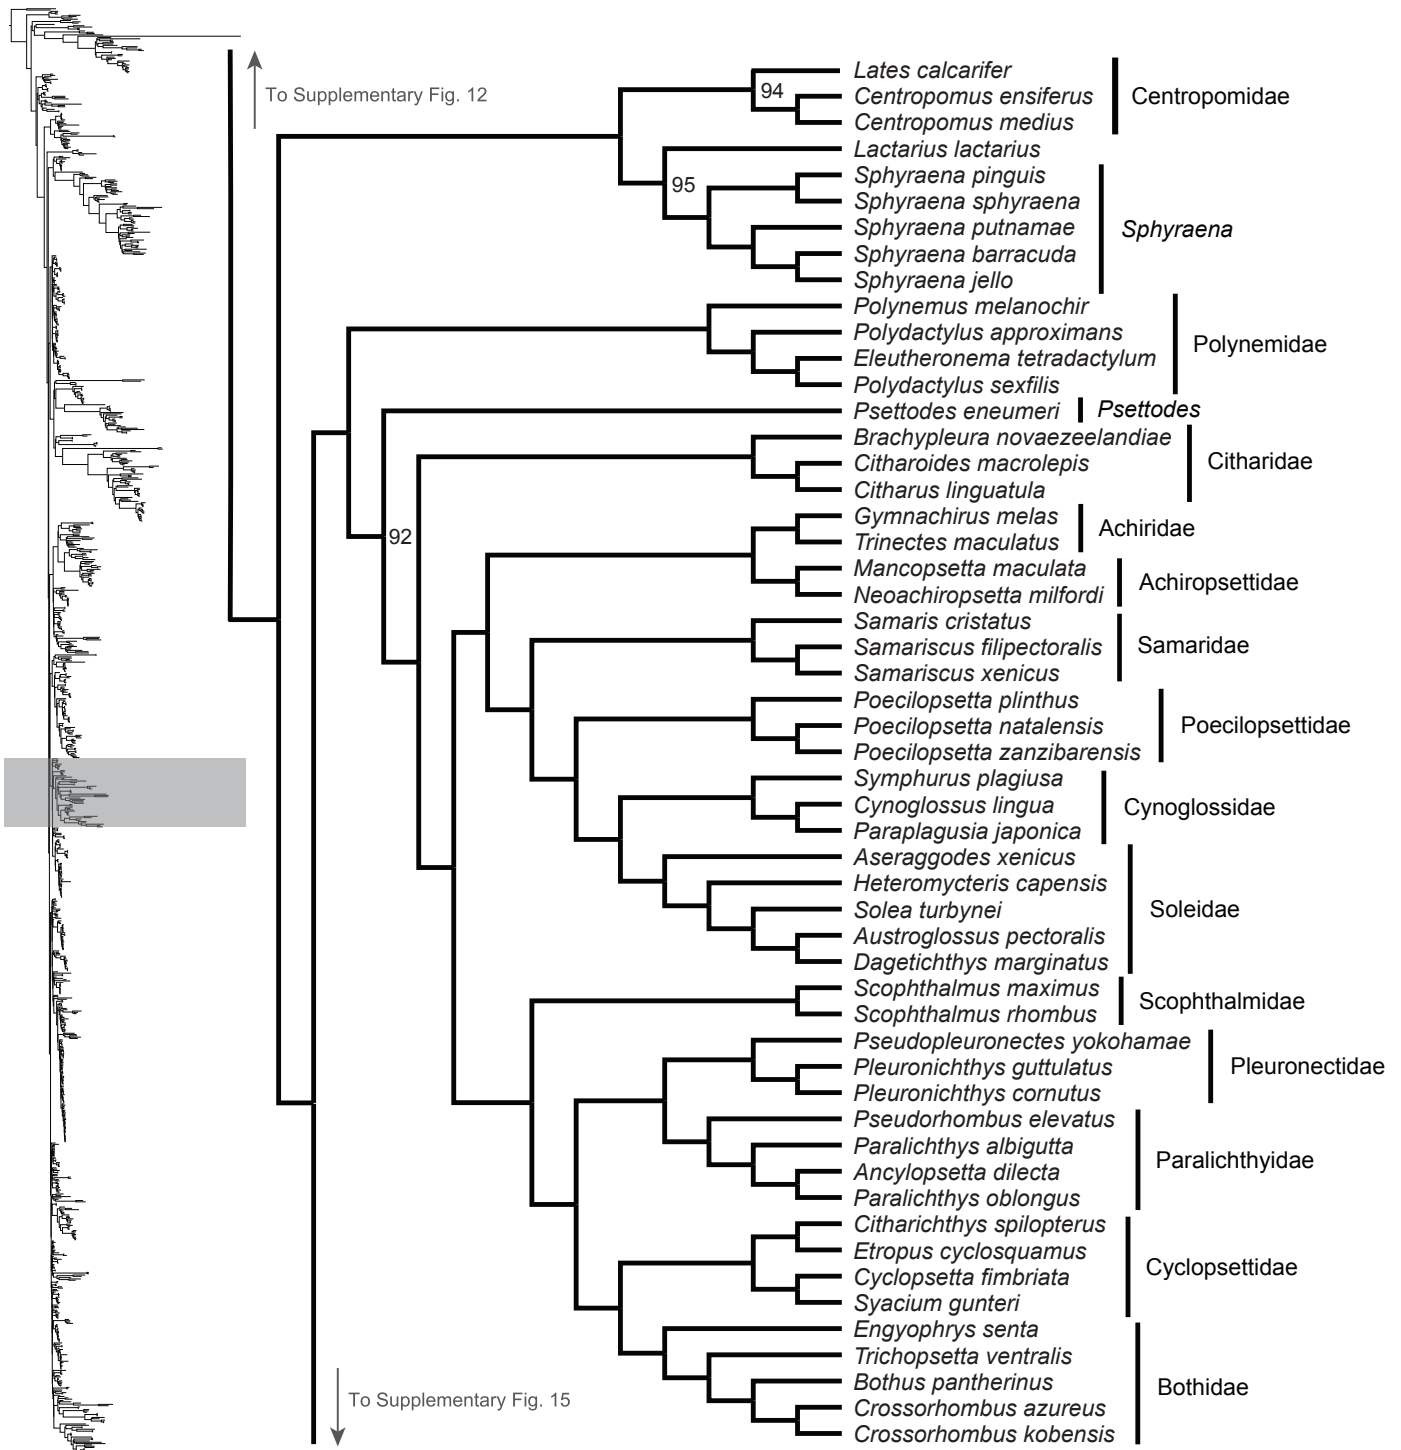

**Supplementary Fig. 14: Maximum likelihood phylogeny inferred in IQ-TREE.**

A guide tree on the left marks (with a gray rectangle), the region of the acanthomorph tree represented in the figure. Numbers at nodes reflect bootstrap support values. All nodes without a numerical annotation have 100% bootstrap support. Orders, families or genera for taxa are listed to the right of the vertical black bars. Any tips left unassigned to a higher taxon are monotypic or monogeneric taxa.

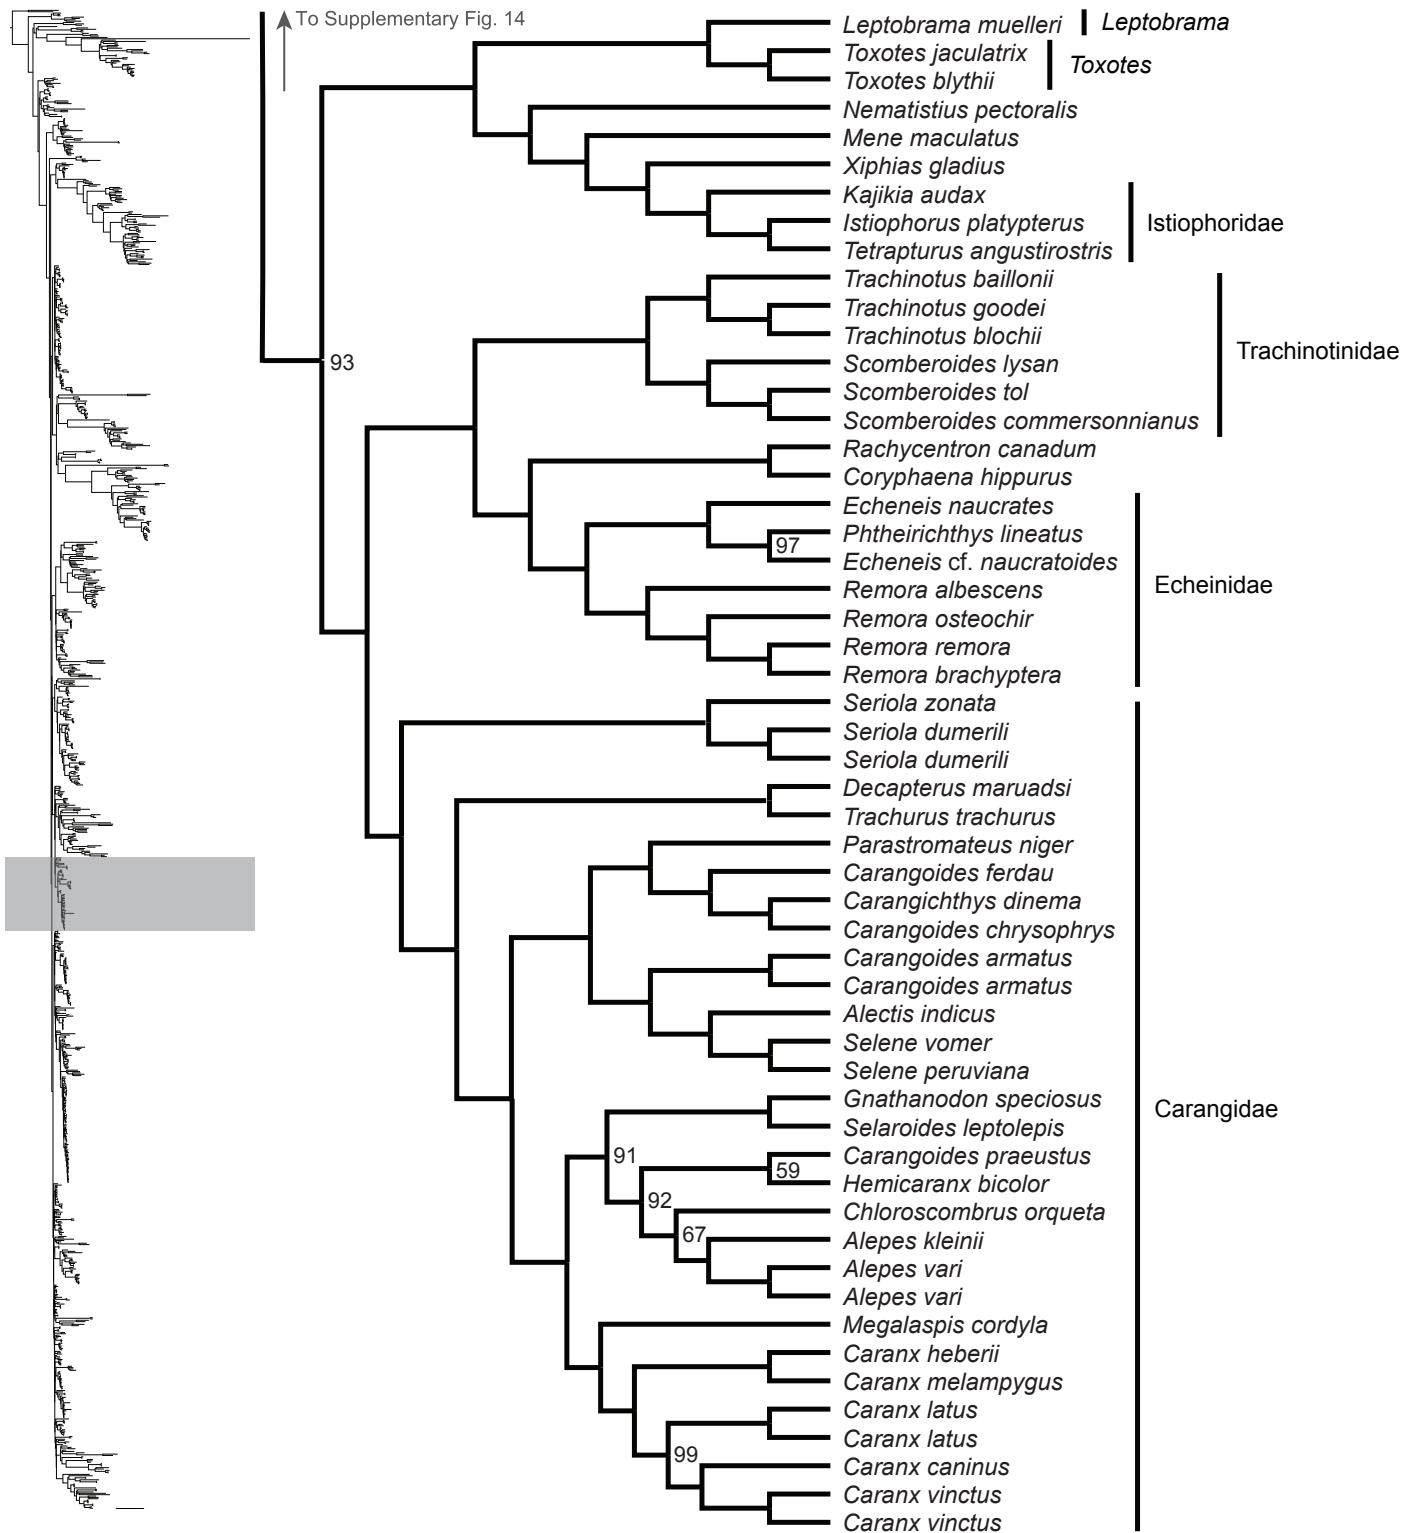

**Supplementary Fig. 15: Maximum likelihood phylogeny inferred in IQ-TREE.**

A guide tree on the left marks (with a gray rectangle), the region of the acanthomorph tree represented in the figure. Numbers at nodes reflect bootstrap support values. All nodes without a numerical annotation have 100% bootstrap support. Orders, families or genera for taxa are listed to the right of the vertical black bars. Any tips left unassigned to a higher taxon are monotypic or monogeneric taxa.

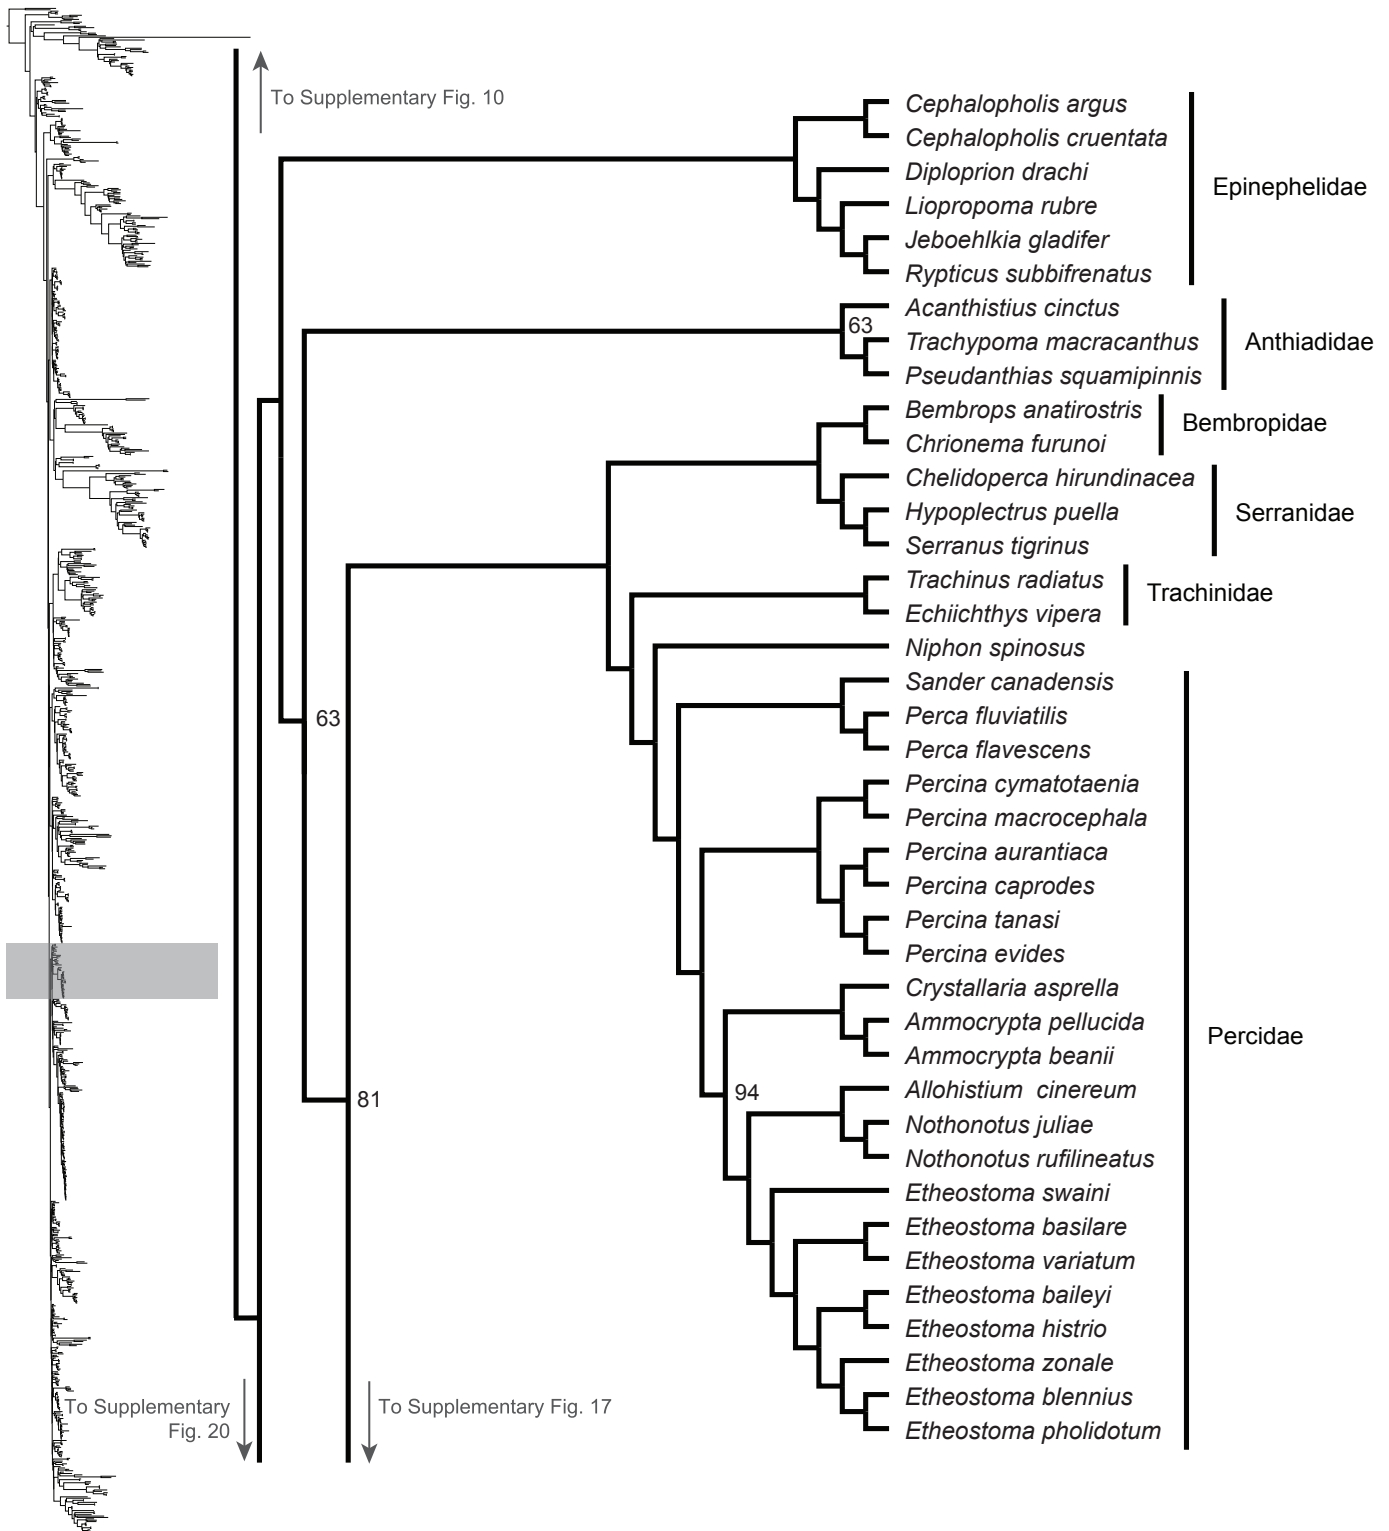

**Supplementary Fig. 16: Maximum likelihood phylogeny inferred in IQ-TREE.**

A guide tree on the left marks (with a gray rectangle), the region of the acanthomorph tree represented in the figure. Numbers at nodes reflect bootstrap support values. All nodes without a numerical annotation have 100% bootstrap support. Orders, families or genera for taxa are listed to the right of the vertical black bars. Any tips left unassigned to a higher taxon are monotypic or monogeneric taxa.

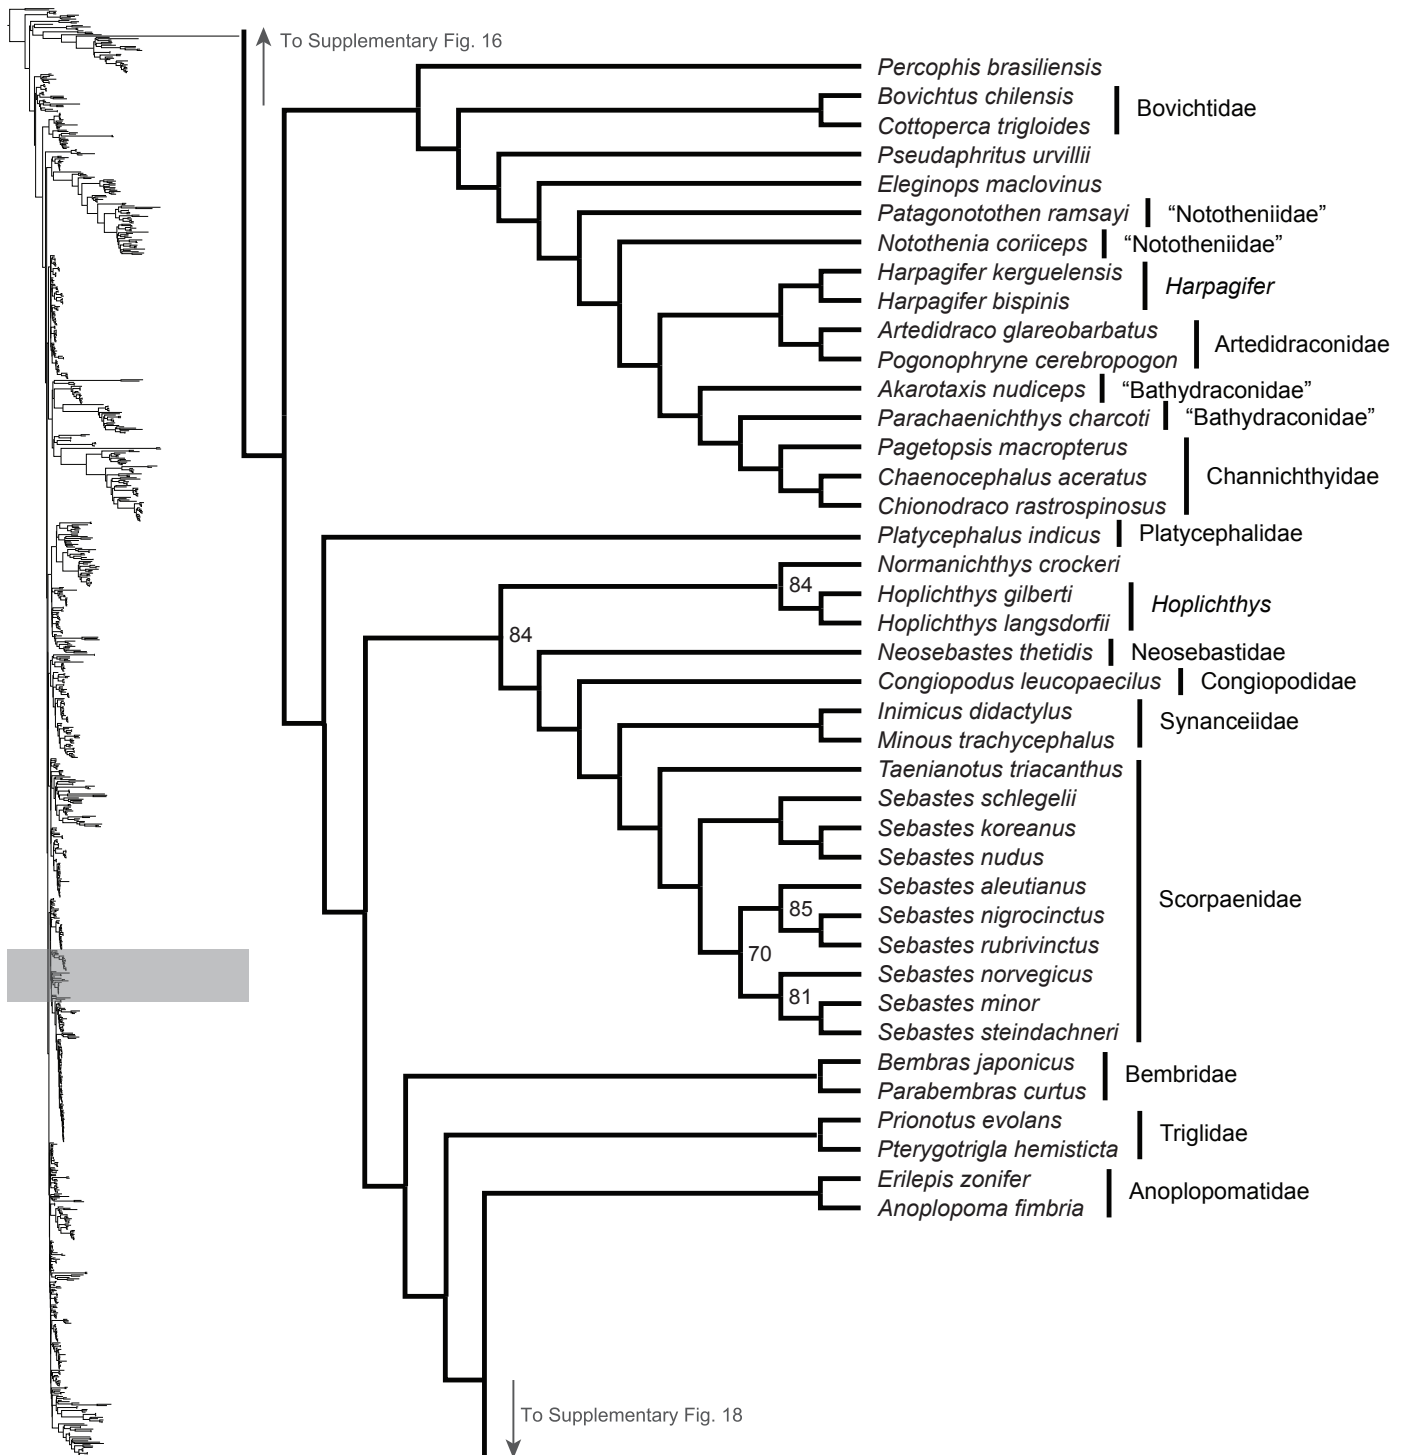

**Supplementary Fig. 17: Maximum likelihood phylogeny inferred in IQ-TREE.**

A guide tree on the left marks (with a gray rectangle), the region of the acanthomorph tree represented in the figure. Numbers at nodes reflect bootstrap support values. All nodes without a numerical annotation have 100% bootstrap support. Orders, families or genera for taxa are listed to the right of the vertical black bars. Any tips left unassigned to a higher taxon are monotypic or monogeneric taxa.

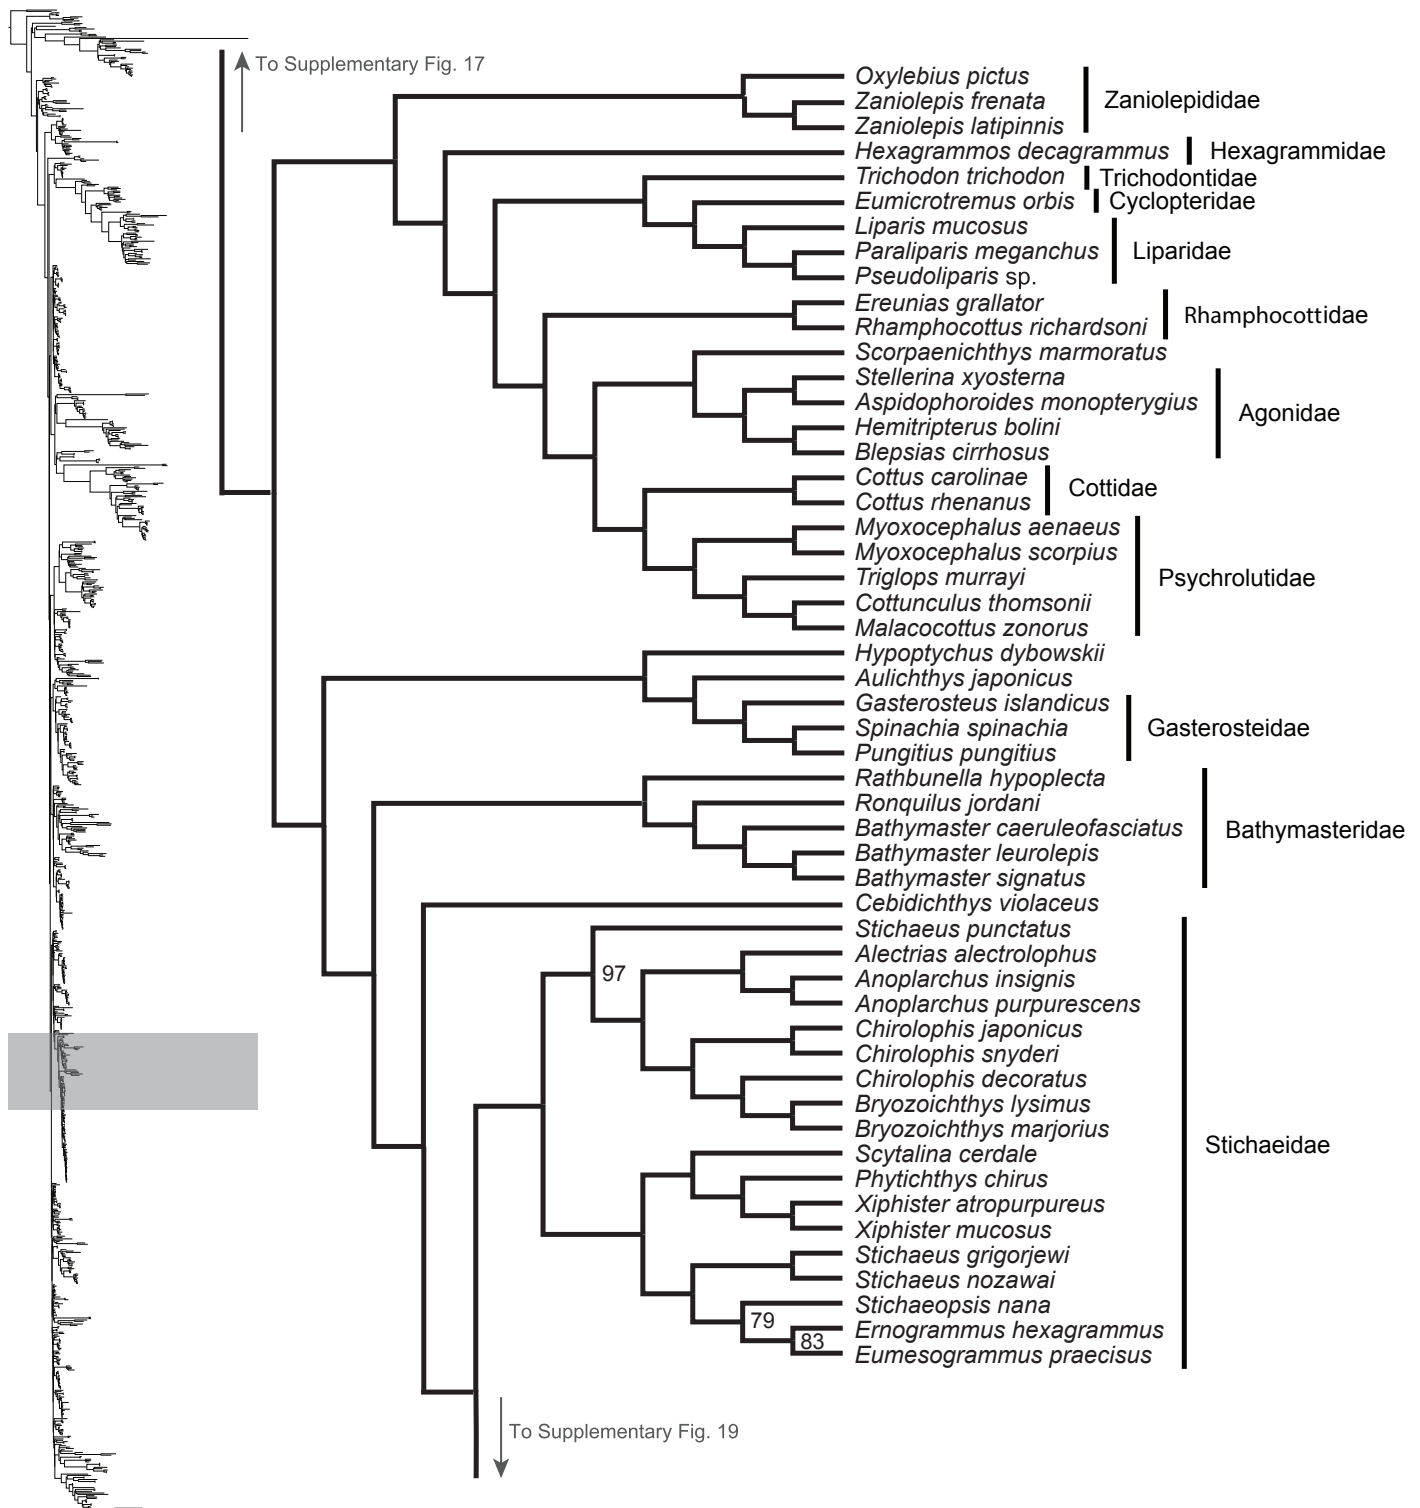

### Supplementary Fig. 18: Maximum likelihood phylogeny inferred in IQ-TREE.

A guide tree on the left marks (with a gray rectangle), the region of the acanthomorph tree represented in the figure. Numbers at nodes reflect bootstrap support values. All nodes without a numerical annotation have 100% bootstrap support. Orders, families or genera for taxa are listed to the right of the vertical black bars. Any tips left unassigned to a higher taxon are monotypic or monogeneric taxa.

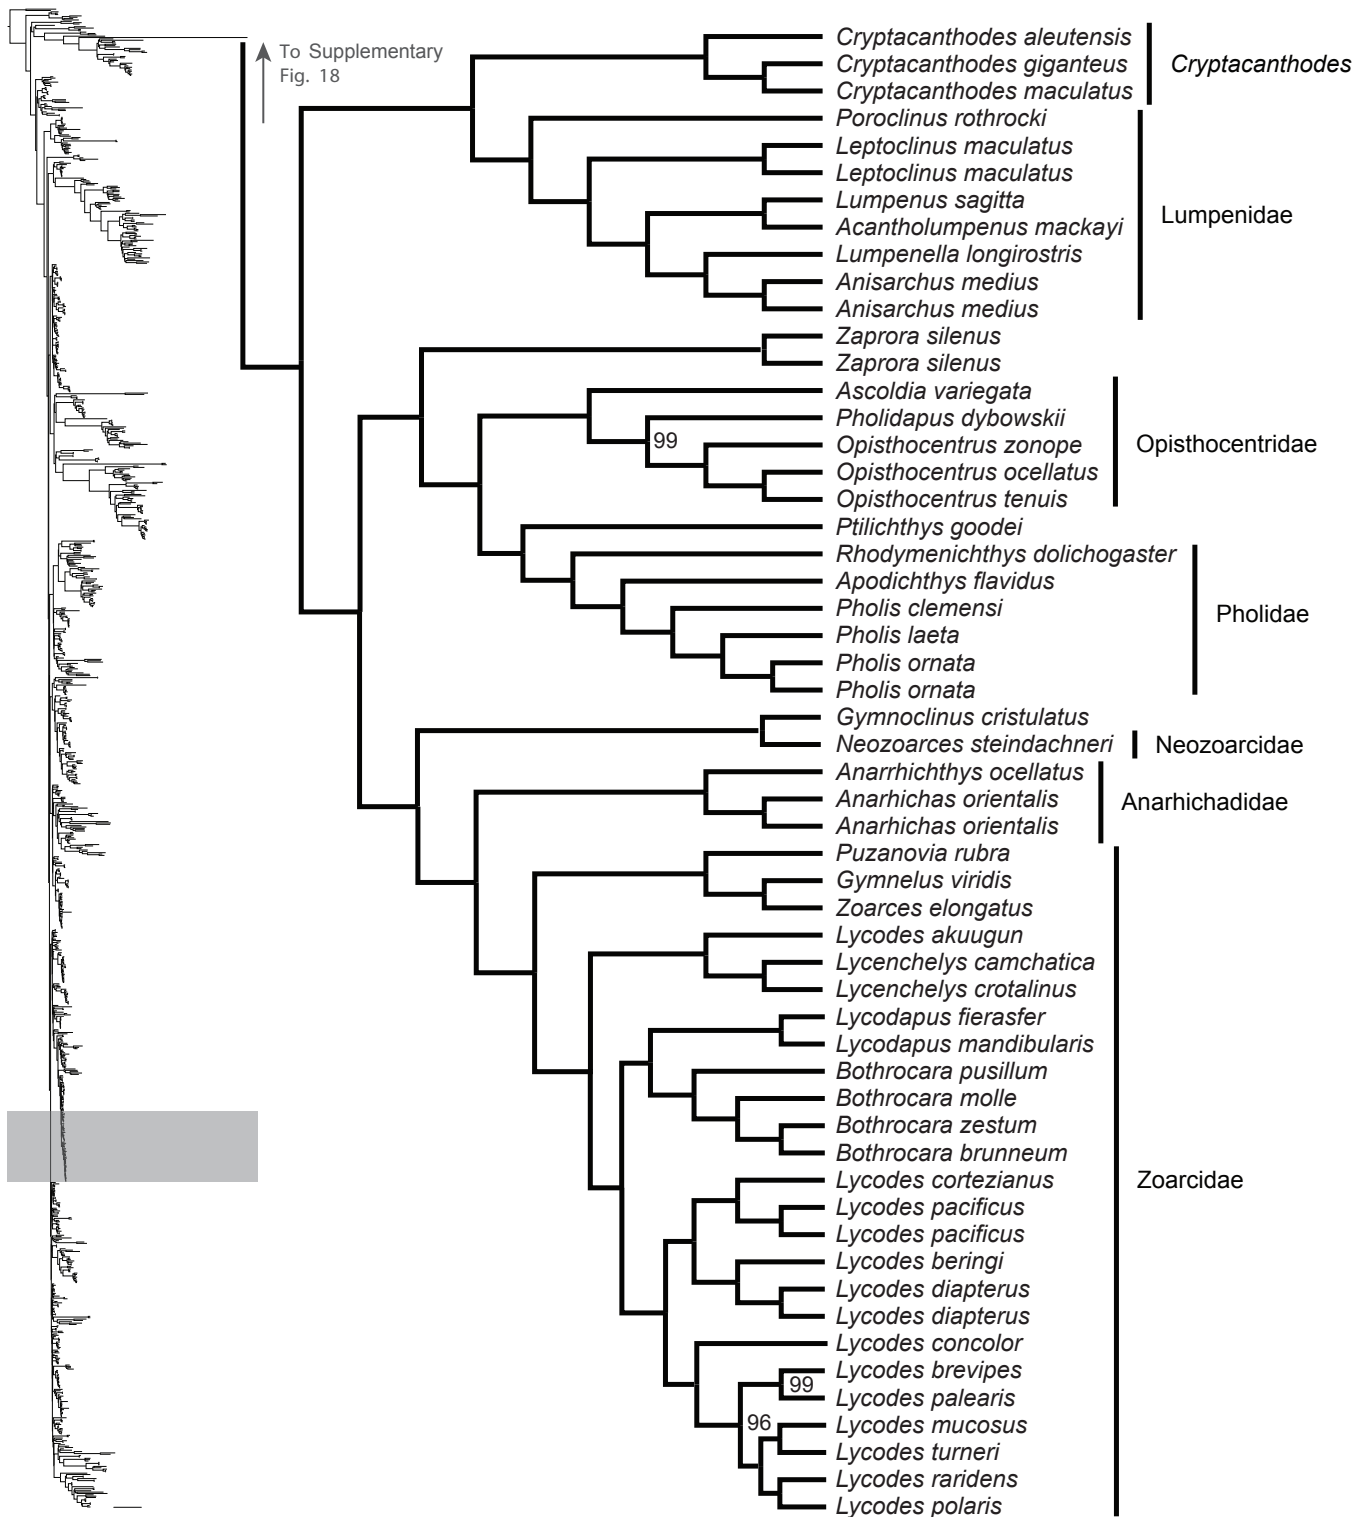

**Supplementary Fig. 19: Maximum likelihood phylogeny inferred in IQ-TREE.**

A guide tree on the left marks (with a gray rectangle), the region of the acanthomorph tree represented in the figure. Numbers at nodes reflect bootstrap support values. All nodes without a numerical annotation have 100% bootstrap support. Orders, families or genera for taxa are listed to the right of the vertical black bars. Any tips left unassigned to a higher taxon are monotypic or monogeneric taxa.



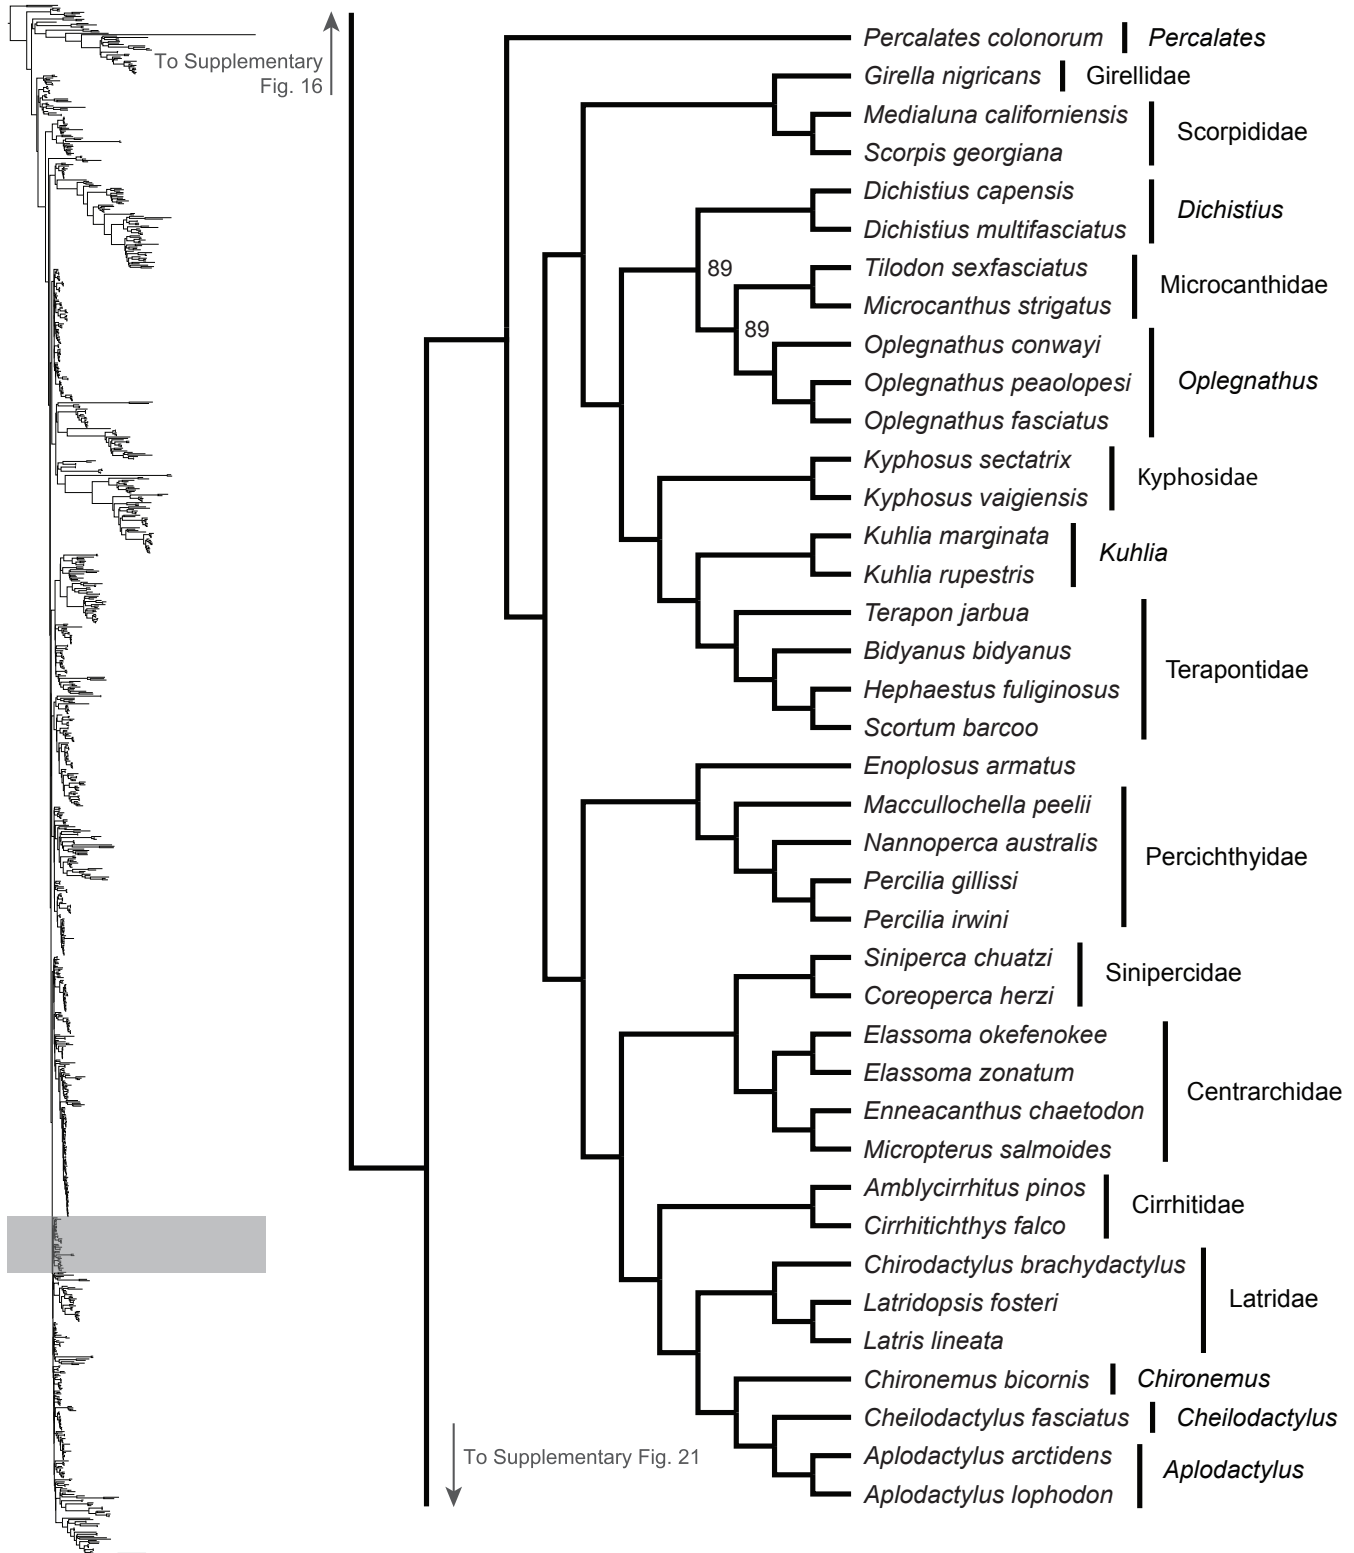

**Supplementary Fig. 20: Maximum likelihood phylogeny inferred in IQ-TREE.**

A guide tree on the left marks (with a gray rectangle), the region of the acanthomorph tree represented in the figure. Numbers at nodes reflect bootstrap support values. All nodes without a numerical annotation have 100% bootstrap support. Orders, families or genera for taxa are listed to the right of the vertical black bars. Any tips left unassigned to a higher taxon are monotypic or monogeneric taxa.

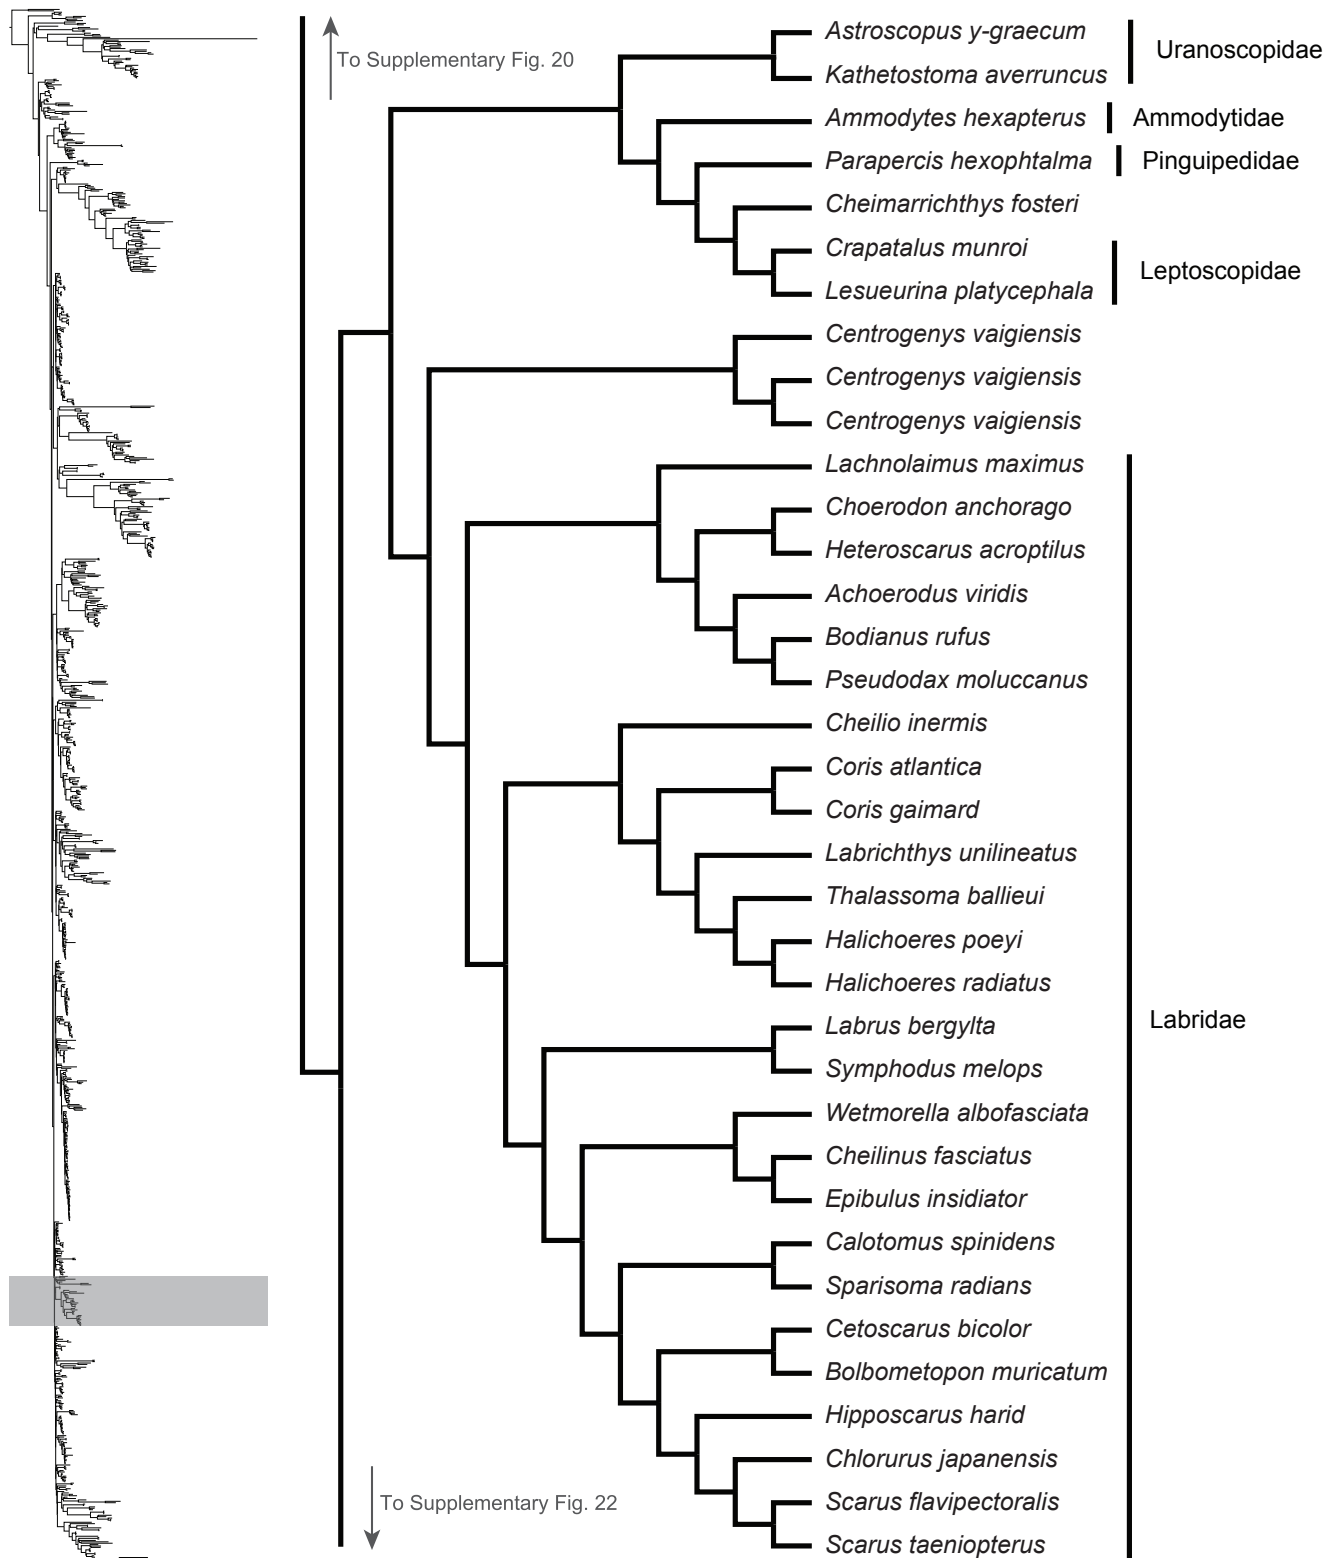

**Supplementary Fig. 21: Maximum likelihood phylogeny inferred in IQ-TREE.**

A guide tree on the left marks (with a gray rectangle), the region of the acanthomorph tree represented in the figure. All nodes have 100% bootstrap support. Orders, families or genera for taxa are listed to the right of the vertical black bars. Any tips left unassigned to a higher taxon are monotypic or monogeneric taxa.

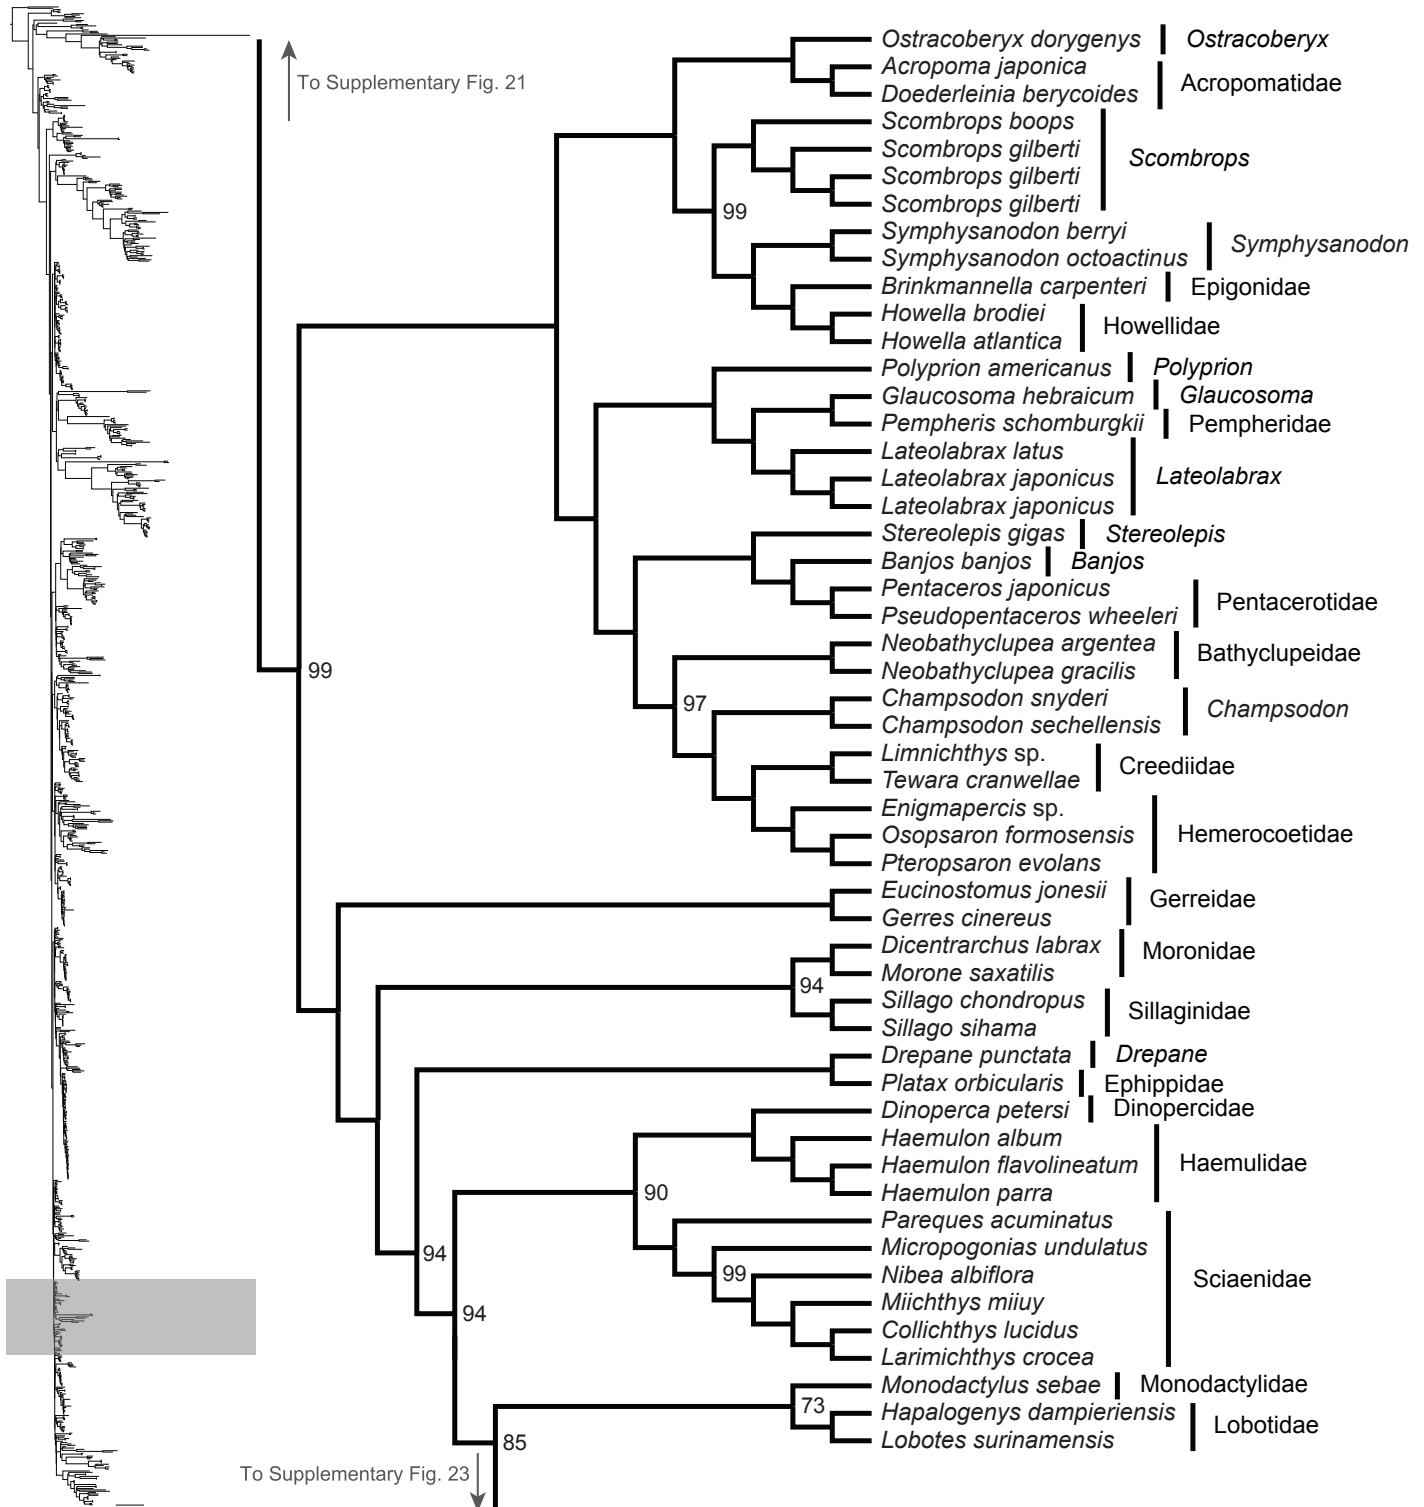

### Supplementary Fig. 22: Maximum likelihood phylogeny inferred in IQ-TREE.

A guide tree on the left marks (with a gray rectangle), the region of the acanthomorph tree represented in the figure. Numbers at nodes reflect bootstrap support values. All nodes without a numerical annotation have 100% bootstrap support. Orders, families or genera for taxa are listed to the right of the vertical black bars.

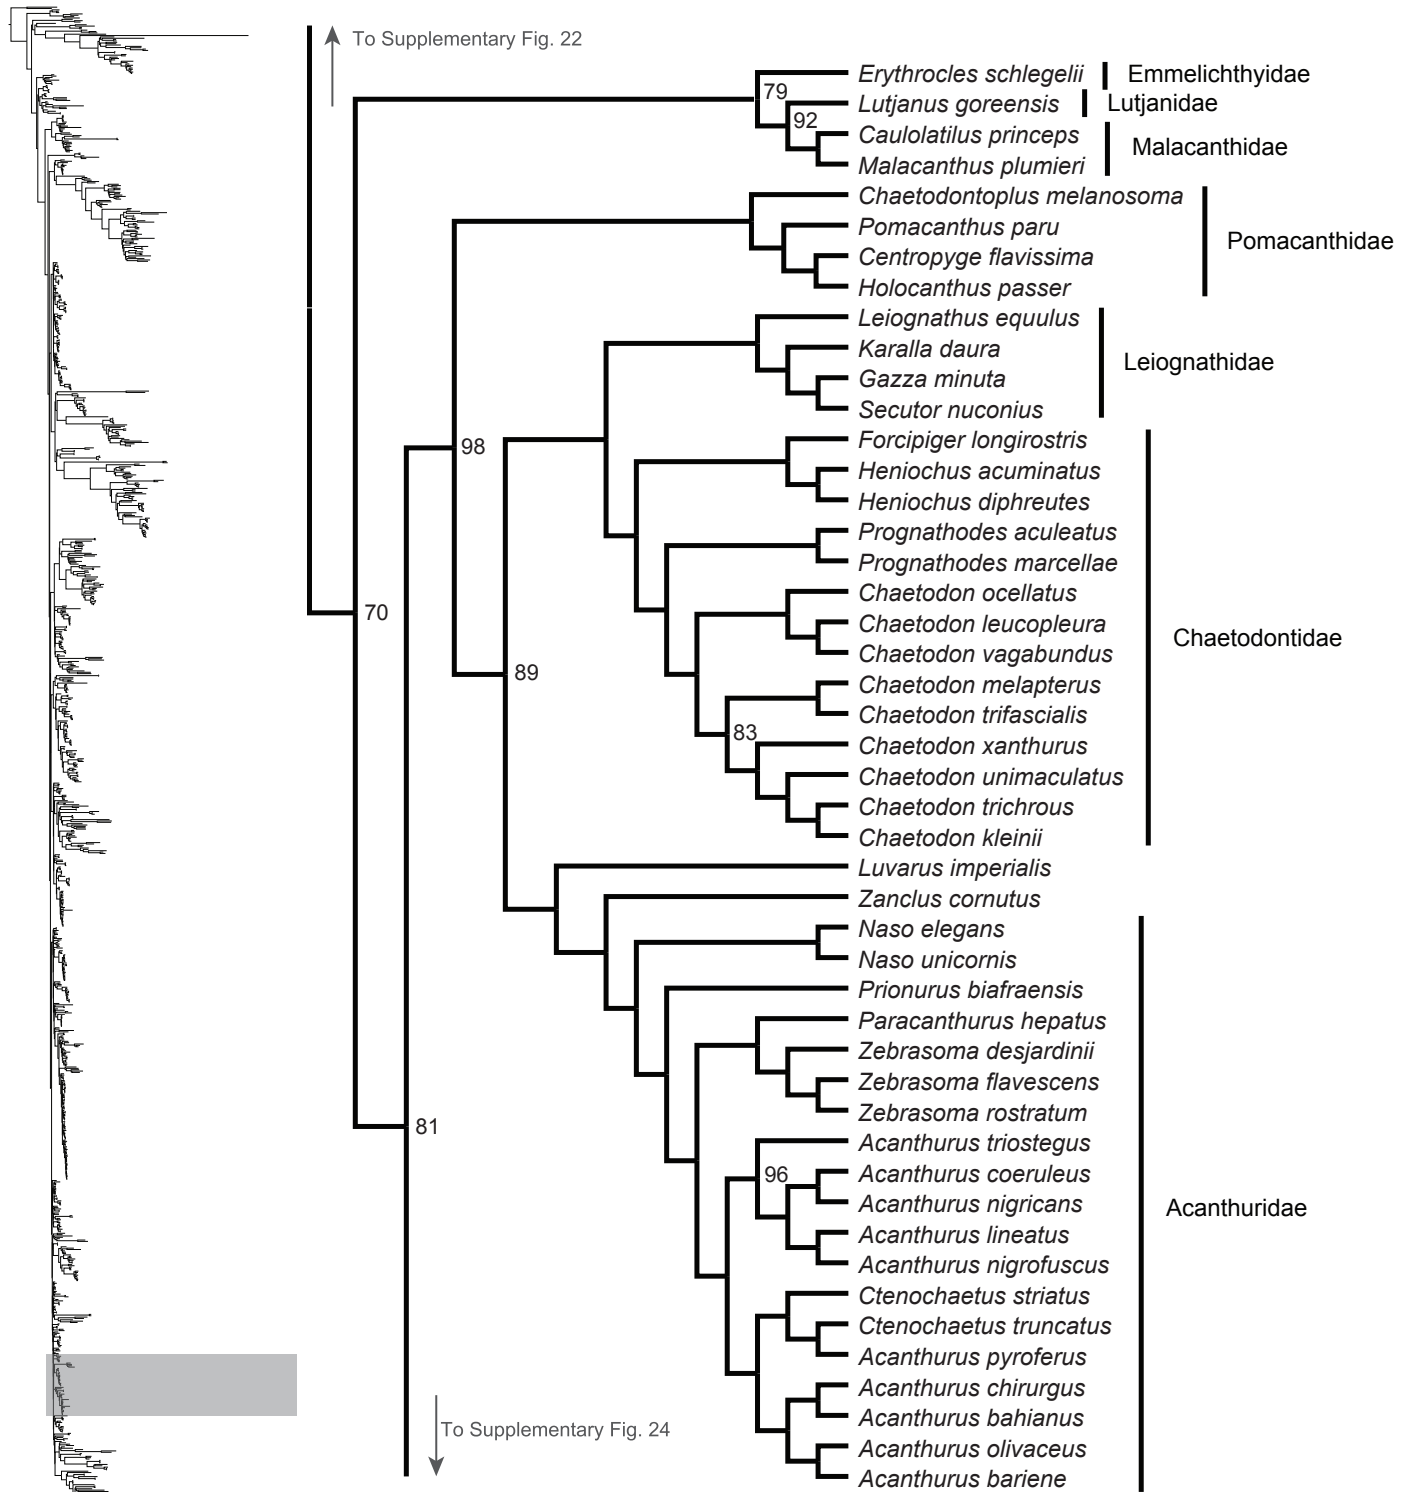

**Supplementary Fig. 23: Maximum likelihood phylogeny inferred in IQ-TREE.**

A guide tree on the left marks (with a gray rectangle), the region of the acanthomorph tree represented in the figure. Numbers at nodes reflect bootstrap support values. All nodes without a numerical annotation have 100% bootstrap support. Orders, families or genera for taxa are listed to the right of the vertical black bars. Any tips left unassigned to a higher taxon are monotypic or monogeneric taxa.

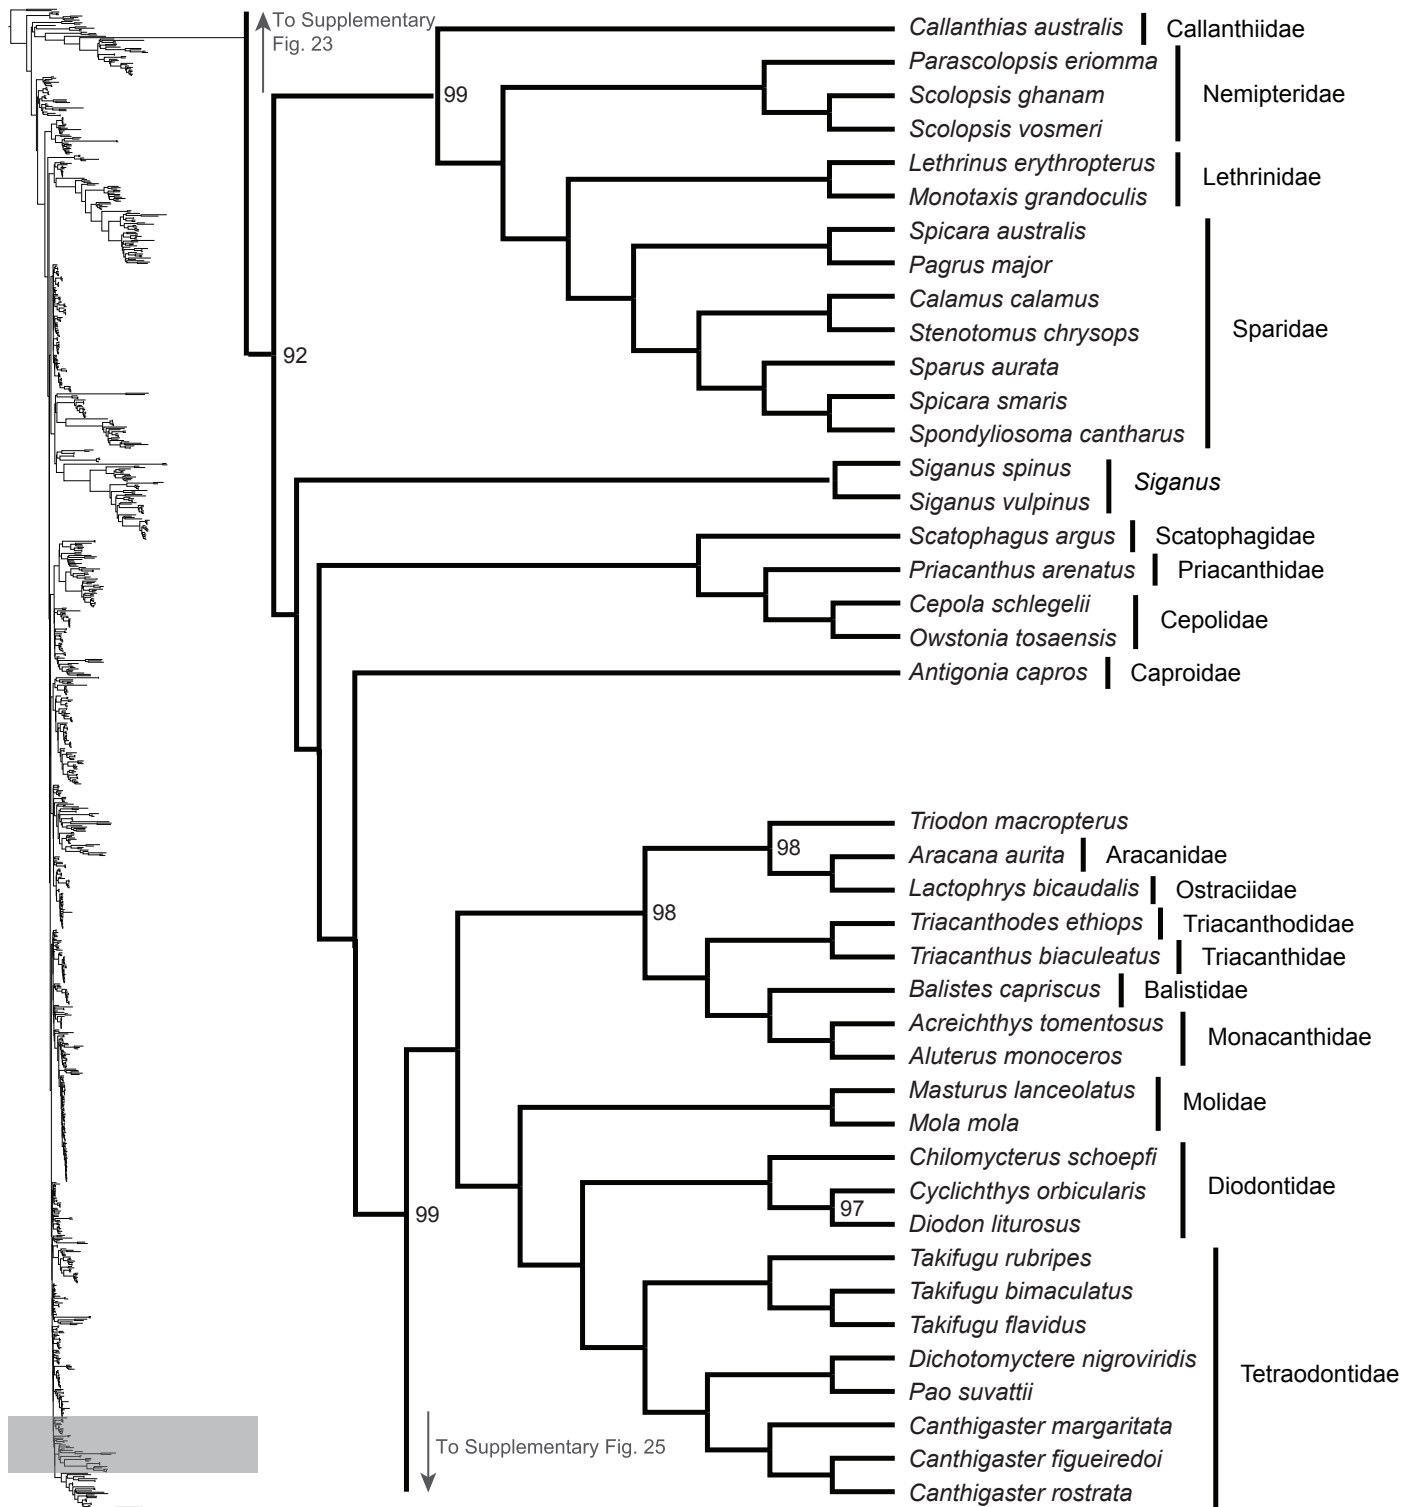

**Supplementary Fig. 24: Maximum likelihood phylogeny inferred in IQ-TREE.**

A guide tree on the left marks (with a gray rectangle), the region of the acanthomorph tree represented in the figure. Numbers at nodes reflect bootstrap support values. All nodes without a numerical annotation have 100% bootstrap support. Orders, families or genera for taxa are listed to the right of the vertical black bars. Any tips left unassigned to a higher taxon are monospecific taxa.

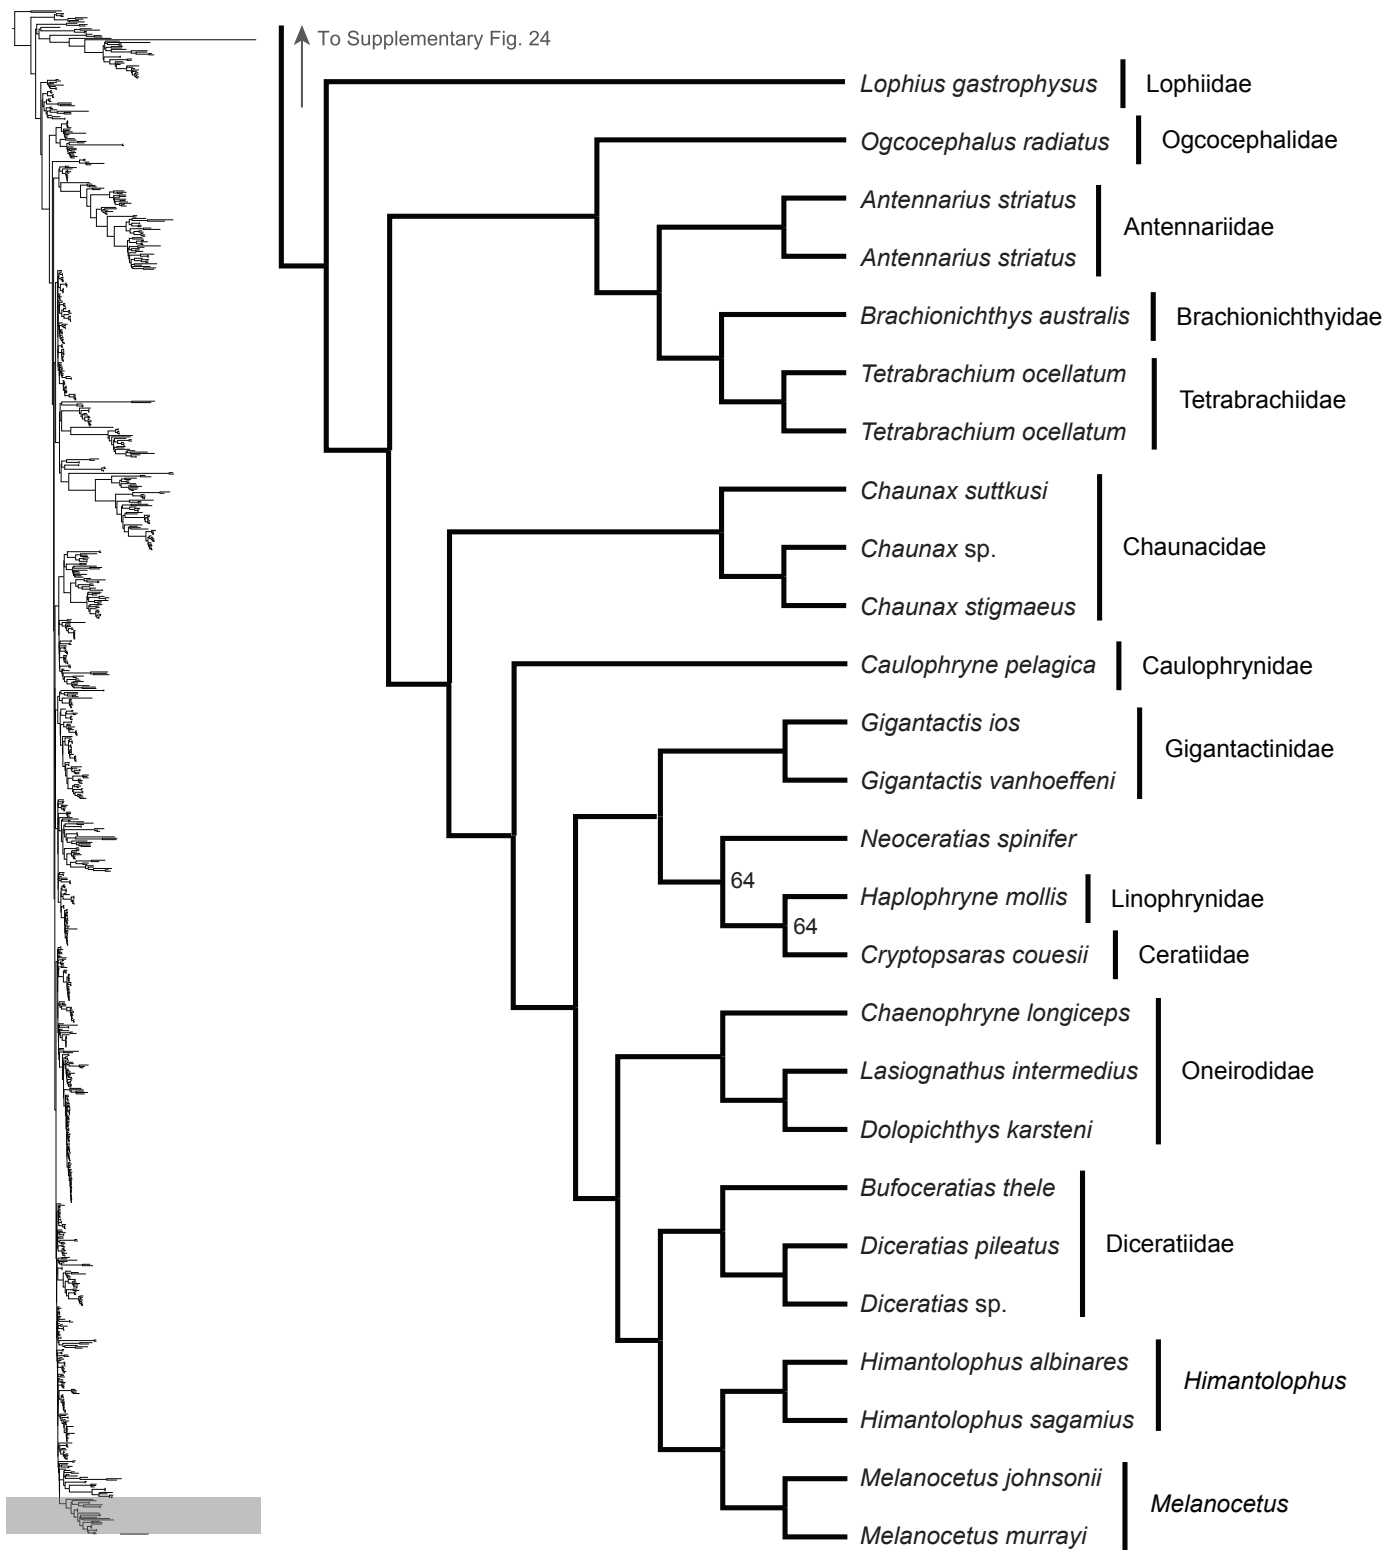

**Supplementary Fig. 25: Maximum likelihood phylogeny inferred in IQ-TREE.**

A guide tree on the left marks (with a gray rectangle), the region of the acanthomorph tree represented in the figure. Numbers at nodes reflect bootstrap support values. All nodes without a numerical annotation have 100% bootstrap support. Orders, families or genera for taxa are listed to the right of the vertical black bars. Any tips left unassigned to a higher taxon are monotypic or monogeneric taxa.

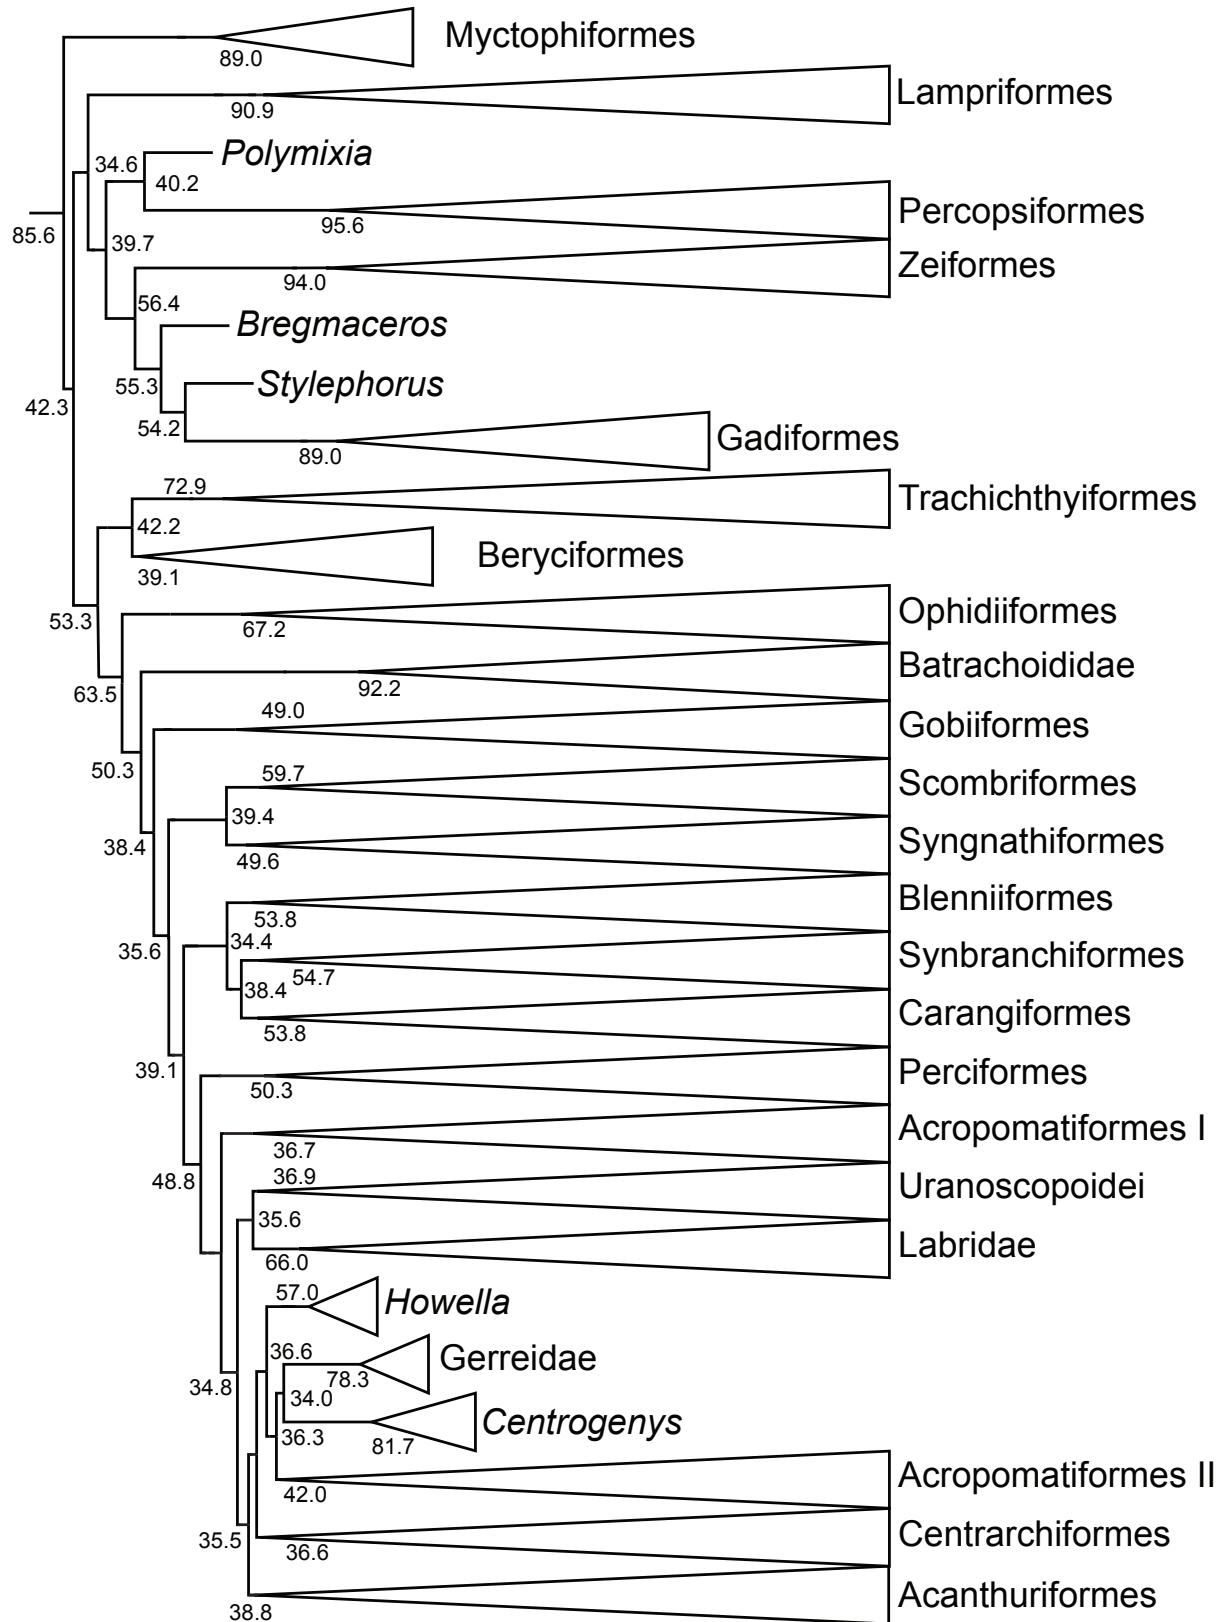

**Supplementary Fig. 26: ASTRAL-III inferred species tree.**

Collapsed species tree inferred under the multi-species coalescent model. Local posterior probability values at nodes do not measure support for bipartitions, but rather are a function of the frequencies of the shown quartet topologies among all gene trees.

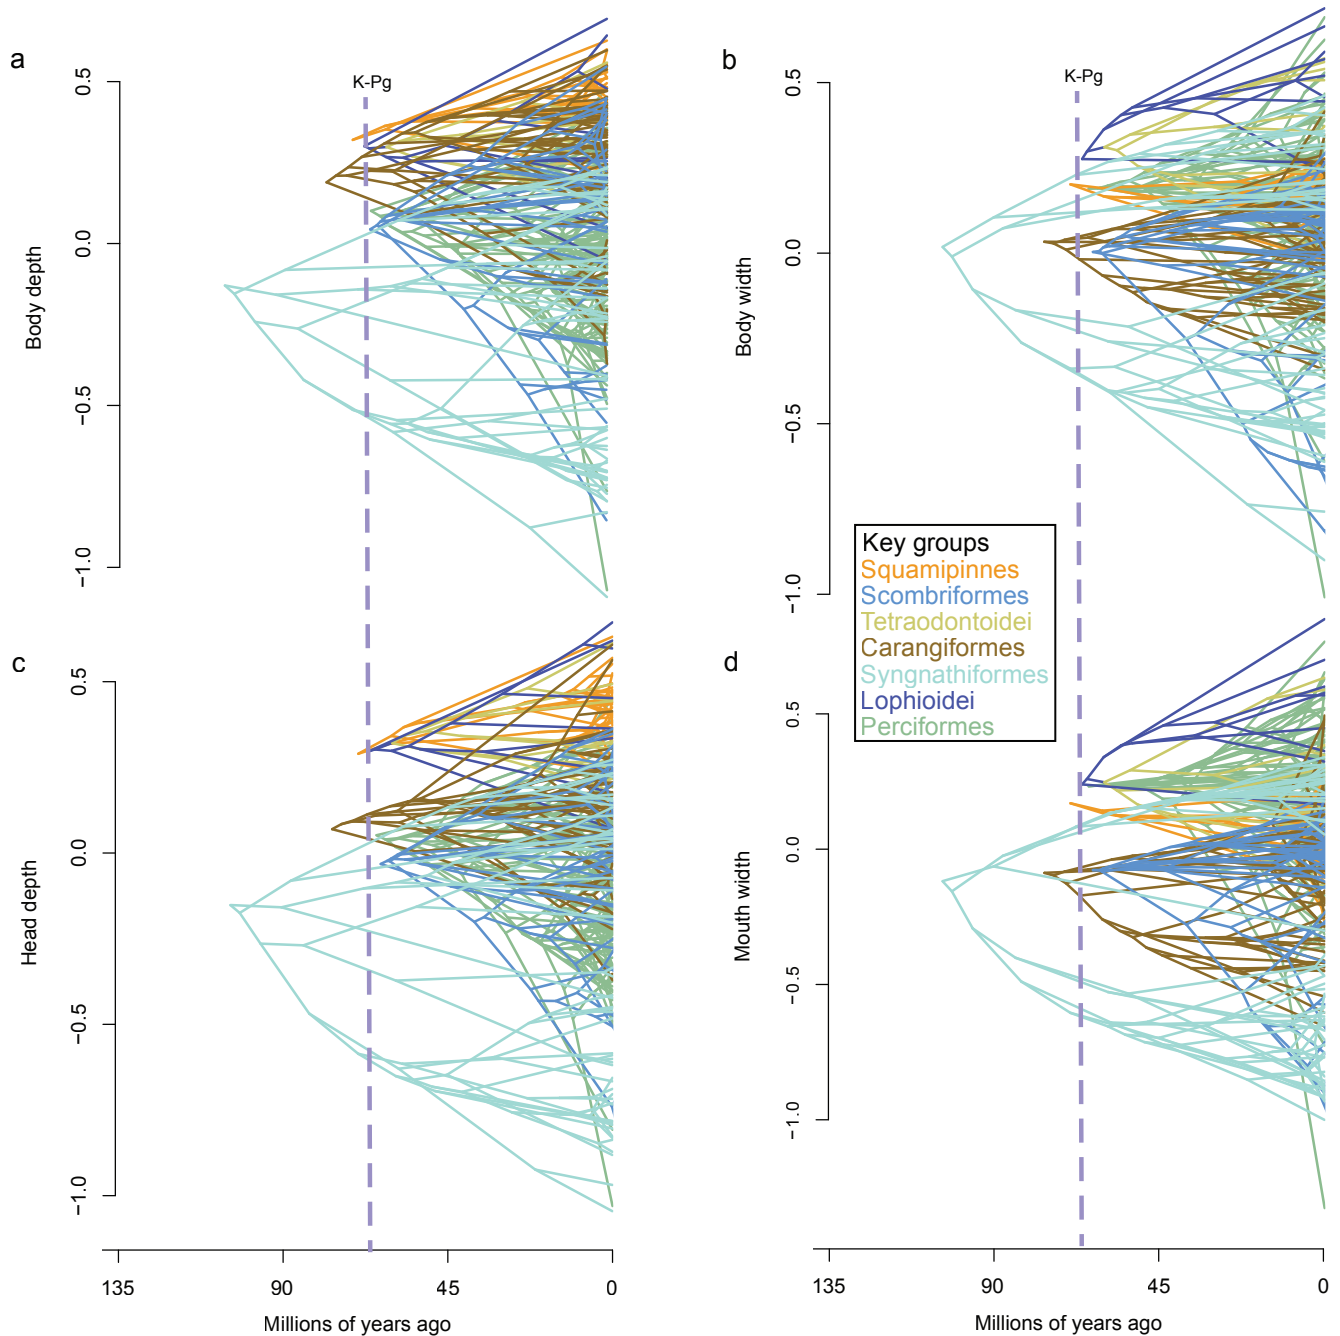

**Supplementary Fig. 27: Phenograms depicting the evolutionary history of four phenotypic traits (body depth and width, and head depth and width) across seven major lineages that arose around the K-Pg.**

The vertical dashed line marks the K-Pg boundary.



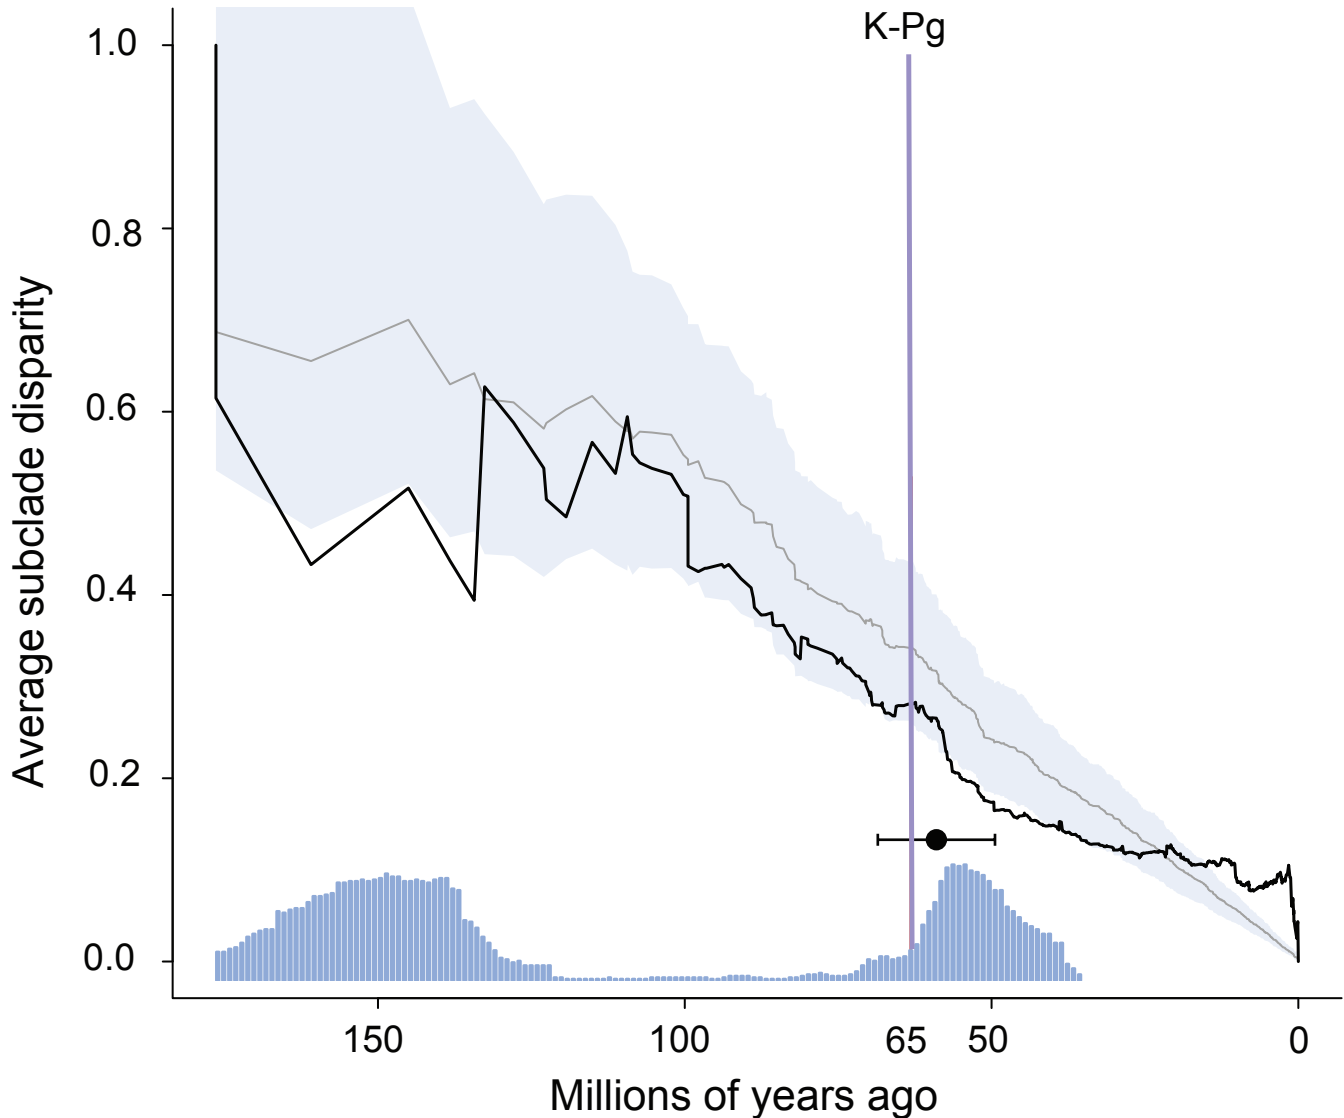

**Supplementary Fig. 28: Disparity through time (DTT) for the combined morphological data, repeated on a sample of 100 trees from the posterior distribution of time-trees.**

The gray line and blue shaded region indicate the median and 95% confidence interval (CI) expected under a Brownian motion model (BM) of evolution, respectively, and solid black line indicates observed pattern of disparity. This is the same plot visualized in Fig. 2, but note that the early portion of the DTT plot that includes the outgroup is not shown in Fig. 2. Acanthomorph body shapes radiated for approximately 20 million years in the aftermath of the K-Pg, followed by within-lineage phenotypic diversification. The blue histogram along the x-axis shows the proportion of time-calibrated trees for which observed disparity falls outside of the BM model's 95% CI in each one-million year interval. The inset, black box and whisker plot depicts the mean ( $\pm 95\%$  CI) of the initial time point at which the observed disparity dropped below that expected from BM following the K-Pg.

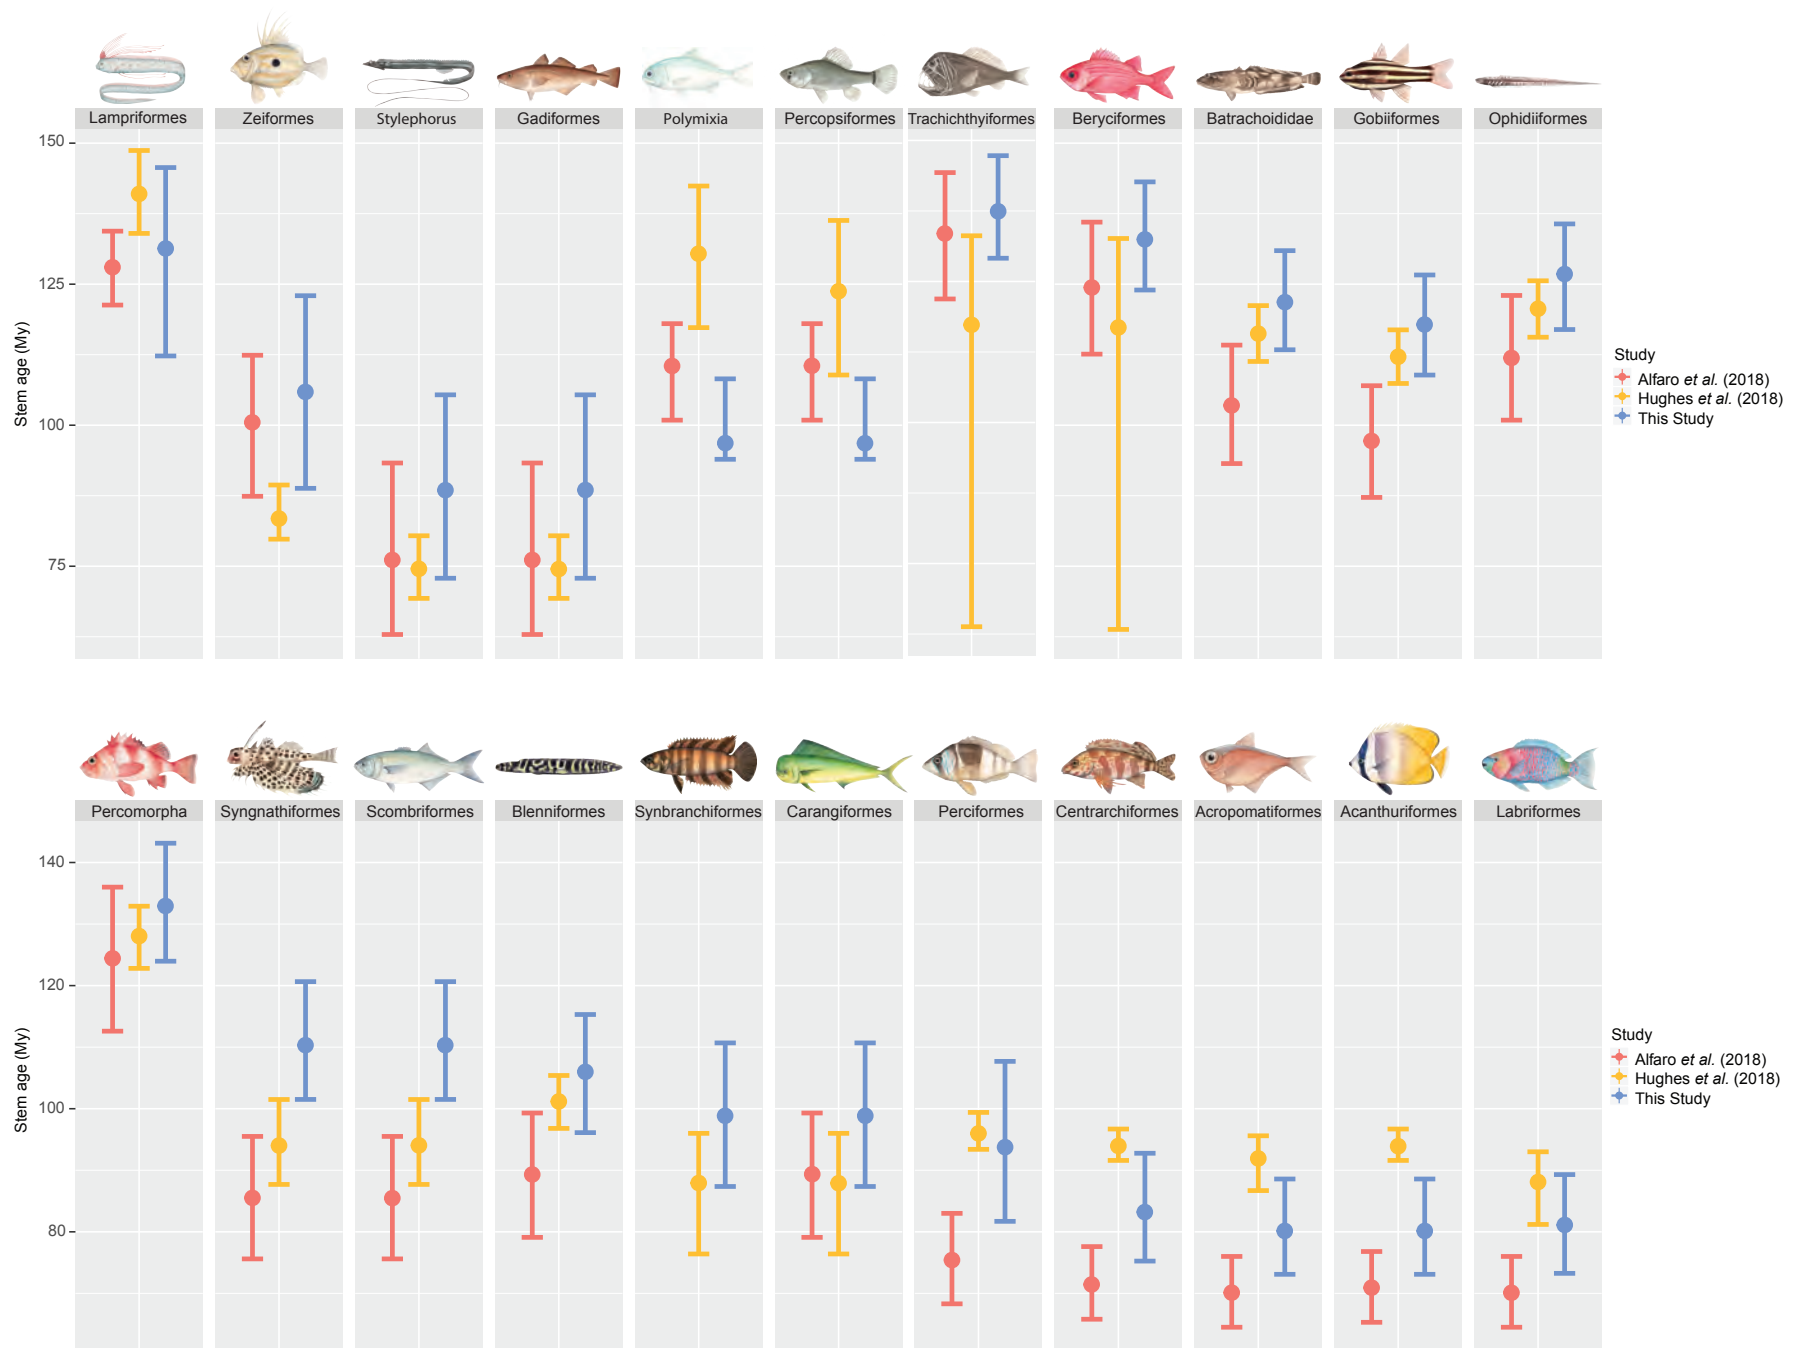

**Supplementary Fig. 29: Median stem age estimates and 95% Highest Posterior Densities (HPD) for 22 major acanthomorph clades, as reported in the following 3 phylogenomic studies: Alfaro et al. (2018), Hughes et al. (2018) and this study.**

Estimates for this study are the raw node heights reported in the 1,084-taxa time tree from Figs. 1 and 2. The 95% HPD of stem ages for most of the represented clades overlap with previous estimates, but we observe some major discrepancies, likely due to differences in tree topologies and taxon sampling.

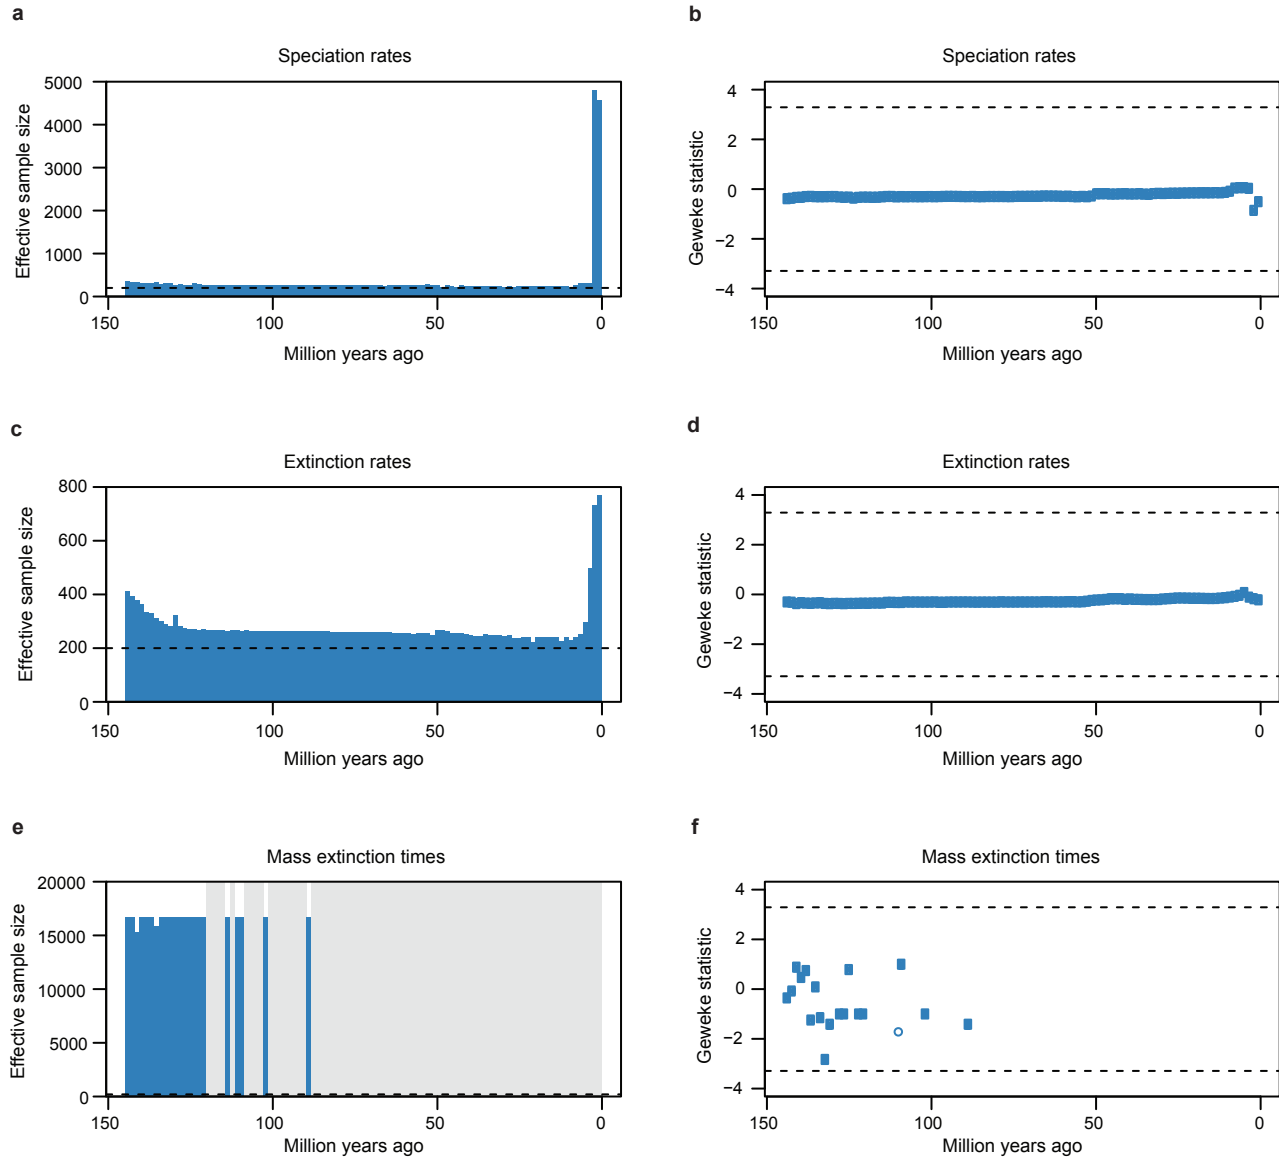

**Supplementary Fig. 30: Effective sample sizes (ESS) of parameters and Geweke diagnostics reflect within-chain convergence in the TESS-CoMET analysis depicted in Extended Data Fig.3.**

Blue bars and dots reflect that the run successfully converged for the parameter at a given time interval. Horizontal dashed lines reflect canonical, acceptable threshold values or 95% confidence intervals for the two diagnostics ( $ESS \geq 200$  for a, c, and e;  $P > 0.05$  for b, d, and f). a, Effective sample size for speciation rate estimates. b, Geweke statistic for post-burn-in speciation rate estimates. c, Effective sample size for extinction rate estimates. d, Geweke statistic for post-burn-in extinction rate estimates. e, Effective sample size for mass extinction times. f, Geweke statistic for post-burn-in mass extinction times.

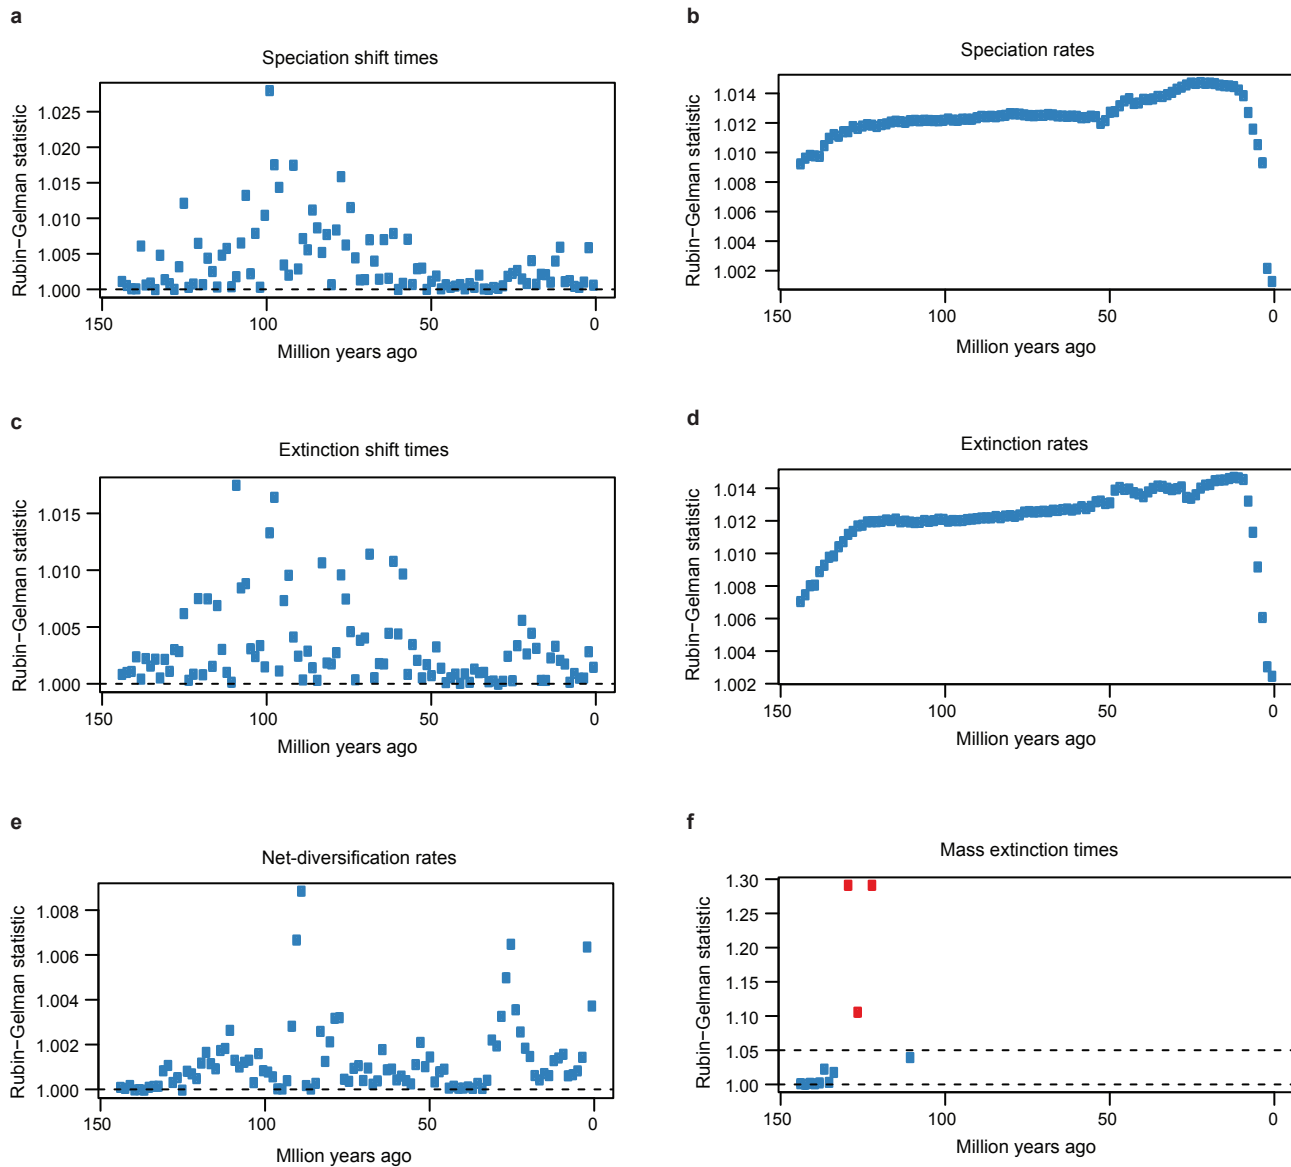

**Supplementary Fig. 31: Results of the Gelman-Rubin test show convergence of three independent replicates of the TESS-CoMET analysis represented in Extended Data Fig.3.** Blue dots indicate that the ratio of within-chain variance to between-chain variance is  $<1.05$ , suggesting the independent MCMC simulations have converged on the same distribution of parameter values. Red dots indicate failed convergence of runs for those time interval-specific parameter estimates. Horizontal dashed lines represent the ideal value (1.00) for the diagnostic. a, Rubin-Gelman statistic for speciation shift times. b, Rubin-Gelman statistic for speciation rates. c, Rubin-Gelman statistic for extinction shift times. d, Rubin-Gelman statistic for extinction rates. e, Rubin-Gelman statistic for net-diversification rates. f, Rubin-Gelman statistic for mass extinction time estimates. A second horizontal dashed line marks the critical value (1.05) above which the test is considered to have failed for that estimate.

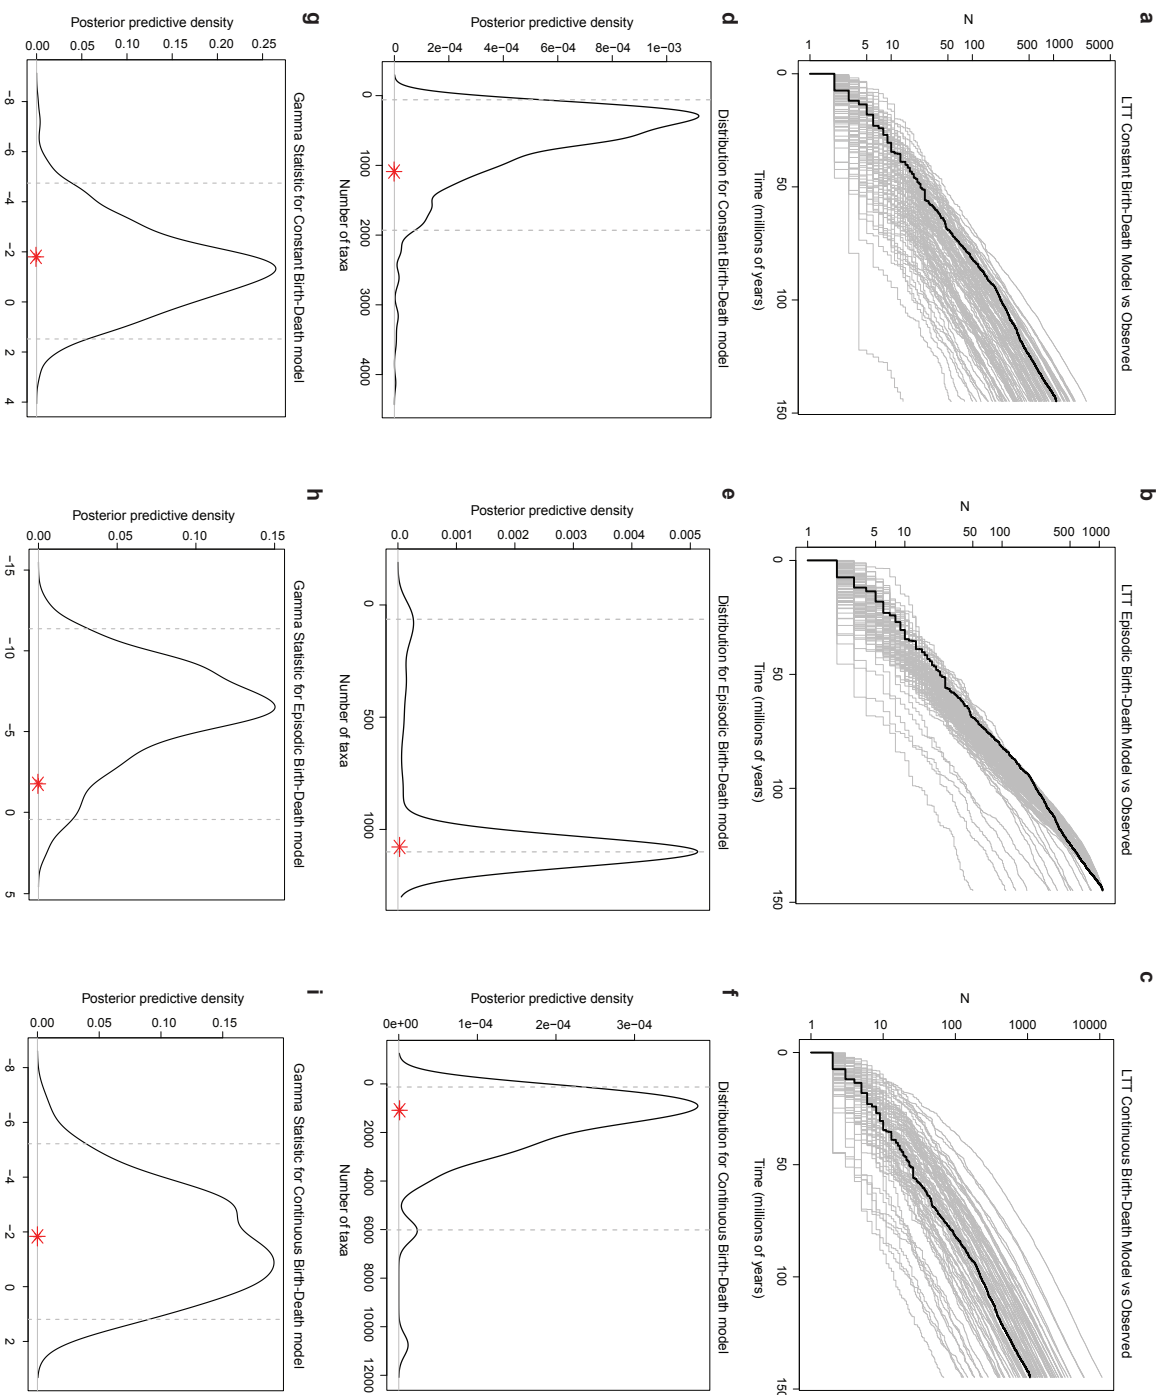

**Supplementary Fig. 32: Assessment of the absolute fit of three candidate birth-death (BD) models to the time-calibrated phylogeny of Acanthomorpha.**

Figures a-c compare lineage-through-time (LTT) curves for simulated trees under a given model (grey lines) to the LTT curve observed for the acanthomorph phylogeny (black line). Figures d-e plot the posterior-predictive distributions for the total number of species estimated to exist in the tree under each model. Dashed lines represent the 95% credible interval for the distribution and red asterisks indicate the total number of acanthomorph species (1,075) in the empirical data. Figures g-i plot the posterior-predictive distributions for the gamma statistic. Dashed lines represent the 95% credible interval for the distribution and red asterisks indicate the value of the gamma statistic empirically calculated for the acanthomorph phylogeny. Candidate models include: 1.) a constant rate birth-death model, 2.) an episodic birth-death model with a rate shift 50 Myra and 3.) a birth-death model with decreasing speciation rates through time. All three candidate models assume uniform (random) incomplete taxon sampling.

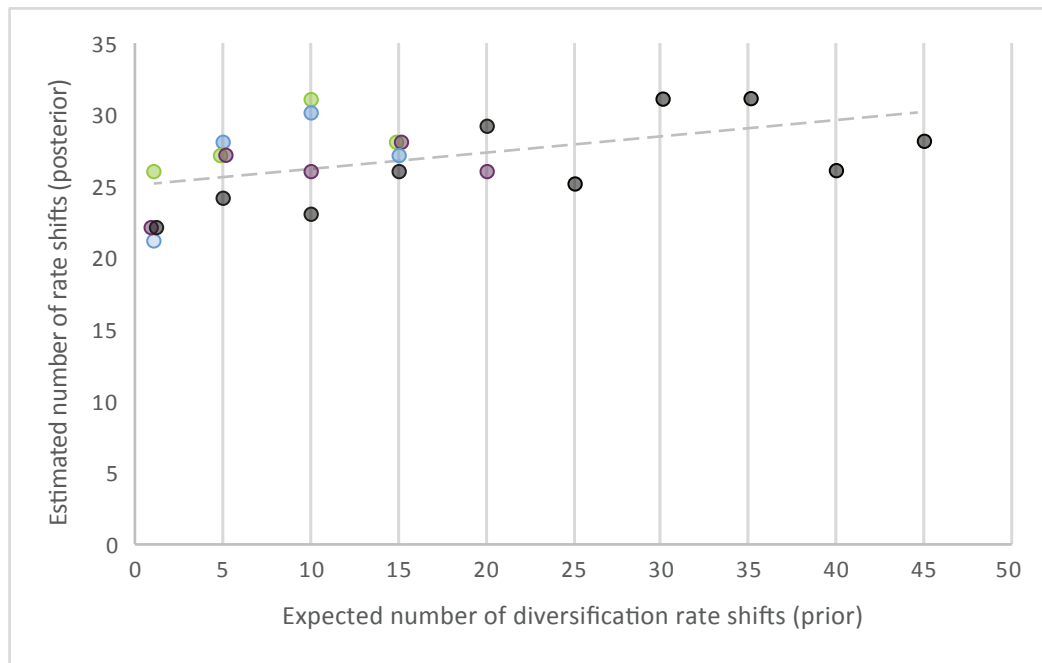

**Supplementary Fig. 33: The posterior number of shifts in speciation rates inferred in BAMM is weakly predicted by the prior.**

Our BAMM analyses used varying numbers of expected speciation rate shifts, and so the resulting maximum shift credibility (MSC) configurations displayed different numbers of estimated rate shifts, shown here as a scatterplot. The slope of the dashed, regression line (0.1049) suggests that changing the inputted prior parameter does not greatly affect the posterior prediction ( $y = 0.1049x + 25.063$ ; R-squared= 0.217). The standard error of the prior coefficient is 0.0436 and of the intercept is 0.8393. Colors of data points correspond to the settings used when running Markov Chain Monte Carlo (MCMC) simulations in BAMM: black corresponds to 4 MCMC chains in the analysis with a deltaT of 0.05, purple corresponds to 4 MCMC chains in the analysis with a deltaT of 0.1, blue corresponds to 2 MCMC chains in the analysis with a deltaT of 0.05, and green corresponds to 2 MCMC chains in the analysis with a deltaT of 0.1.
